# Supplementary material for: The gene expression landscape of the human locus coeruleus revealed by single-nucleus and spatially-resolved transcriptomics
Source: eLife. 2024 Jan 24;12:RP84628. doi: 10.7554/eLife.84628 (PMC10945708; doi:10.7554/eLife.84628)
Supplement: Supplementary file 2. — (A) Differential expression (DE) testing results in pseudobulked Visium SRT data. Columns include gene ID, gene name, mean log-transformed normalized counts (logcounts) in manually annotated LC and non-LC regions (‘mean_logcounts_LC’ and ‘mean_logcounts_nonLC’), log2 fold change (log2FC), p-value, false discovery rate (FDR), and columns identifying significant (FDR <0.05 and FC >2) and highly significant (FDR <10–3 and FC >3) genes. The table is provided as a .xlsx file sheet. (B) Spatially variable genes (SVGs) in Visium SRT data. Results for SVGs identified using nnSVG in Visium SRT data. Columns include gene ID, gene name, overall rank of SVGs identified in replicated tissue areas (‘replicated_overall_rank,’ i.e. top LC-associated SVGs; see Results), overall rank of identified SVGs according to average rank across tissue areas (‘overall_rank,’ i.e. including choroid plexus-associated SVGs from one donor; see Results), average rank of identified SVGs across individual tissue areas (‘average_rank’), number of times (tissue areas) identified within top 100 SVGs (‘n_withinTop100’), and ranks within each individual tissue area. The table is provided as a .xlsx file sheet. (C) DE testing results for NE neuron cluster vs. other neuronal clusters in snRNA-seq data. DE testing results comparing NE neuron cluster against other neuronal clusters in snRNA-seq data. Columns include gene ID, gene name, sum of UMI counts across all nuclei (‘sum_gene’), average logcounts within the NE neuron cluster (‘self_average’), average of average logcounts within other neuronal clusters (‘other_average’), combined p-value, FDR, summary log2 fold change in the pairwise comparison with the lowest p-value (‘summary_logFC’), and column identifying significant (FDR <0.05 and FC >2) genes. The table is provided as a .xlsx file sheet. (D) DE testing results for NE neuron cluster vs. all other clusters in snRNA-seq data. DE testing results comparing NE neuron cluster against all other clusters in [file elife-84628-supp2.xlsx]

## Sheet: A_Visium_pseudobulkDE
gene_id	gene_name	source	type	gene_version	gene_type	mean_logcounts_LC	mean_logcounts_nonLC	log2FC	p_value	FDR	significant	highly_significant
ENSG00000123454	DBH	HAVANA	gene	12	protein_coding	9.74018	6.78288	2.9573	7.33358e-10	9.40678e-06	TRUE	TRUE
ENSG00000170962	PDGFD	HAVANA	gene	13	protein_coding	6.17359	3.65532	2.51827	3.04391e-09	1.95221e-05	TRUE	TRUE
ENSG00000245870	LINC00682	HAVANA	gene	4	lncRNA	6.35542	3.71667	2.63875	6.99949e-09	2.19107e-05	TRUE	TRUE
ENSG00000105976	MET	HAVANA	gene	15	protein_coding	5.13828	2.46304	2.67523	7.84026e-09	2.19107e-05	TRUE	TRUE
ENSG00000150594	ADRA2A	HAVANA	gene	7	protein_coding	7.27865	5.37789	1.90076	8.54084e-09	2.19107e-05	TRUE	TRUE
ENSG00000103546	SLC6A2	HAVANA	gene	18	protein_coding	9.16933	6.25998	2.90935	1.05566e-08	2.25682e-05	TRUE	TRUE
ENSG00000180176	TH	HAVANA	gene	14	protein_coding	9.24437	6.53693	2.70744	1.42133e-08	2.27892e-05	TRUE	TRUE
ENSG00000008283	CYB561	HAVANA	gene	16	protein_coding	8.89221	6.60745	2.28476	1.38059e-08	2.27892e-05	TRUE	TRUE
ENSG00000133101	CCNA1	HAVANA	gene	10	protein_coding	5.75579	4.11256	1.64322	2.24566e-08	2.8805e-05	TRUE	TRUE
ENSG00000223573	TINCR	HAVANA	gene	7	protein_coding	4.66422	2.62838	2.03584	2.19435e-08	2.8805e-05	TRUE	TRUE
ENSG00000119508	NR4A3	HAVANA	gene	18	protein_coding	4.54824	2.71827	1.82997	2.83362e-08	2.93262e-05	TRUE	TRUE
ENSG00000189221	MAOA	HAVANA	gene	9	protein_coding	8.61355	6.81518	1.79836	2.97218e-08	2.93262e-05	TRUE	TRUE
ENSG00000102287	GABRE	HAVANA	gene	19	protein_coding	7.62198	4.87924	2.74275	2.78573e-08	2.93262e-05	TRUE	TRUE
ENSG00000165646	SLC18A2	HAVANA	gene	14	protein_coding	9.19997	6.57976	2.62021	6.11158e-08	5.22622e-05	TRUE	TRUE
ENSG00000108828	VAT1	HAVANA	gene	16	protein_coding	9.40409	7.55518	1.84891	5.97822e-08	5.22622e-05	TRUE	TRUE
ENSG00000057019	DCBLD2	HAVANA	gene	16	protein_coding	6.86378	5.03872	1.82506	6.62046e-08	5.30754e-05	TRUE	TRUE
ENSG00000159307	SCUBE1	HAVANA	gene	19	protein_coding	4.90283	2.58304	2.31979	1.49266e-07	0.000112626	TRUE	TRUE
ENSG00000115963	RND3	HAVANA	gene	13	protein_coding	5.94474	4.18018	1.76456	1.80216e-07	0.000128424	TRUE	TRUE
ENSG00000119125	GDA	HAVANA	gene	16	protein_coding	5.54742	3.85282	1.69459	2.34028e-07	0.000157994	TRUE	TRUE
ENSG00000134138	MEIS2	HAVANA	gene	20	protein_coding	6.65936	5.33576	1.32361	2.6051e-07	0.000167078	TRUE	FALSE
ENSG00000168268	NT5DC2	HAVANA	gene	11	protein_coding	7.7898	6.12345	1.66635	3.13727e-07	0.000191627	TRUE	TRUE
ENSG00000186642	PDE2A	HAVANA	gene	16	protein_coding	5.6191	4.2674	1.35169	3.44166e-07	0.000200664	TRUE	FALSE
ENSG00000180616	SSTR2	HAVANA	gene	9	protein_coding	7.26934	5.43659	1.83275	5.89315e-07	0.000302366	TRUE	TRUE
ENSG00000099994	SUSD2	HAVANA	gene	11	protein_coding	5.90964	3.8517	2.05794	5.72452e-07	0.000302366	TRUE	TRUE
ENSG00000147256	ARHGAP36	HAVANA	gene	12	protein_coding	8.3285	5.94935	2.37914	5.47274e-07	0.000302366	TRUE	TRUE
ENSG00000169860	P2RY1	HAVANA	gene	7	protein_coding	5.71664	4.10069	1.61595	7.41982e-07	0.000352496	TRUE	TRUE
ENSG00000109846	CRYAB	HAVANA	gene	9	protein_coding	8.61334	9.68468	-1.07134	7.41734e-07	0.000352496	TRUE	FALSE
ENSG00000100297	MCM5	HAVANA	gene	16	protein_coding	0.991592	3.12944	-2.13785	7.87511e-07	0.000360765	TRUE	TRUE
ENSG00000182836	PLCXD3	HAVANA	gene	10	protein_coding	7.02682	5.62177	1.40505	9.80238e-07	0.000433569	TRUE	FALSE
ENSG00000175471	MCTP1	HAVANA	gene	19	protein_coding	5.93601	4.30558	1.63042	1.1172e-06	0.000477678	TRUE	TRUE
ENSG00000165462	PHOX2A	HAVANA	gene	5	protein_coding	6.19161	3.28462	2.90699	1.22295e-06	0.000506025	TRUE	TRUE
ENSG00000189067	LITAF	HAVANA	gene	12	protein_coding	5.84167	6.68024	-0.838561	1.35613e-06	0.000543595	FALSE	FALSE
ENSG00000211445	GPX3	HAVANA	gene	12	protein_coding	9.20328	7.55099	1.65229	1.55896e-06	0.000588206	TRUE	TRUE
ENSG00000136868	SLC31A1	HAVANA	gene	11	protein_coding	5.6524	4.27155	1.38085	1.60499e-06	0.000588206	TRUE	FALSE
ENSG00000148826	NKX6-2	HAVANA	gene	9	protein_coding	5.9469	7.1327	-1.18581	1.56329e-06	0.000588206	TRUE	FALSE
ENSG00000109132	PHOX2B	HAVANA	gene	6	protein_coding	5.93543	3.75767	2.17776	1.80097e-06	0.000641695	TRUE	TRUE
ENSG00000162374	ELAVL4	HAVANA	gene	17	protein_coding	7.9882	6.59552	1.39268	1.99745e-06	0.000674246	TRUE	FALSE
ENSG00000138735	PDE5A	HAVANA	gene	16	protein_coding	3.98057	2.88828	1.09228	1.98981e-06	0.000674246	TRUE	FALSE
ENSG00000154645	CHODL	HAVANA	gene	14	protein_coding	6.91852	4.63664	2.28187	2.19213e-06	0.000720986	TRUE	TRUE
ENSG00000166091	CMTM5	HAVANA	gene	21	protein_coding	4.64872	5.93518	-1.28646	2.44616e-06	0.000765289	TRUE	FALSE
ENSG00000125355	TMEM255A	HAVANA	gene	15	protein_coding	7.81746	6.2461	1.57135	2.42699e-06	0.000765289	TRUE	FALSE
ENSG00000173598	NUDT4	HAVANA	gene	14	protein_coding	6.80866	5.41819	1.39047	2.61164e-06	0.000797607	TRUE	FALSE
ENSG00000068615	REEP1	HAVANA	gene	18	protein_coding	8.29857	7.01782	1.28074	2.90493e-06	0.000846852	TRUE	FALSE
ENSG00000167641	PPP1R14A	HAVANA	gene	11	protein_coding	7.01977	8.18522	-1.16545	2.85109e-06	0.000846852	TRUE	FALSE
ENSG00000063015	SEZ6	HAVANA	gene	20	protein_coding	8.01935	6.58401	1.43535	2.98173e-06	0.000849925	TRUE	FALSE
ENSG00000196118	CCDC189	HAVANA	gene	12	protein_coding	6.10192	4.33922	1.76269	3.05944e-06	0.000853117	TRUE	TRUE
ENSG00000066468	FGFR2	HAVANA	gene	22	protein_coding	6.11597	7.36977	-1.25379	3.2917e-06	0.000898354	TRUE	FALSE
ENSG00000168314	MOBP	HAVANA	gene	17	protein_coding	9.11588	10.2139	-1.09806	3.55554e-06	0.000950144	TRUE	FALSE
ENSG00000122012	SV2C	HAVANA	gene	14	protein_coding	7.93928	6.26173	1.67755	3.65121e-06	0.000955797	TRUE	TRUE
ENSG00000117266	CDK18	HAVANA	gene	15	protein_coding	5.88887	7.10093	-1.21206	3.78309e-06	0.000970515	TRUE	FALSE
ENSG00000163399	ATP1A1	HAVANA	gene	16	protein_coding	9.40565	8.00985	1.39579	4.80692e-06	0.00102174	TRUE	FALSE
ENSG00000169432	SCN9A	HAVANA	gene	16	protein_coding	5.99901	4.92105	1.07796	4.72961e-06	0.00102174	TRUE	FALSE
ENSG00000148180	GSN	HAVANA	gene	19	protein_coding	7.11524	8.04762	-0.932377	4.6269e-06	0.00102174	FALSE	FALSE
ENSG00000185567	AHNAK2	HAVANA	gene	7	protein_coding	6.88887	5.35504	1.53383	4.85899e-06	0.00102174	TRUE	FALSE
ENSG00000080644	CHRNA3	HAVANA	gene	16	protein_coding	5.69193	3.15932	2.5326	4.65275e-06	0.00102174	TRUE	FALSE
ENSG00000159720	ATP6V0D1	HAVANA	gene	12	protein_coding	9.00639	7.9186	1.08779	4.71337e-06	0.00102174	TRUE	FALSE
ENSG00000141349	G6PC3	HAVANA	gene	8	protein_coding	7.62627	6.74974	0.876529	4.8108e-06	0.00102174	FALSE	FALSE
ENSG00000105514	RAB3D	HAVANA	gene	8	protein_coding	5.2189	3.83057	1.38832	4.35903e-06	0.00102174	TRUE	FALSE
ENSG00000101265	RASSF2	HAVANA	gene	16	protein_coding	6.61387	7.80781	-1.19393	4.32495e-06	0.00102174	TRUE	FALSE
ENSG00000244274	DBNDD2	HAVANA	gene	7	protein_coding	8.22058	9.18288	-0.962301	4.06458e-06	0.00102174	FALSE	FALSE
ENSG00000165240	ATP7A	HAVANA	gene	20	protein_coding	4.75381	3.25535	1.49846	4.69132e-06	0.00102174	TRUE	FALSE
ENSG00000119714	GPR68	HAVANA	gene	11	protein_coding	4.19614	2.72517	1.47097	5.03081e-06	0.00104081	TRUE	FALSE
ENSG00000115155	OTOF	HAVANA	gene	17	protein_coding	4.8028	3.20898	1.59382	5.17055e-06	0.00105274	TRUE	FALSE
ENSG00000107902	LHPP	HAVANA	gene	14	protein_coding	6.98184	7.92715	-0.945312	5.42026e-06	0.0010707	FALSE	FALSE
ENSG00000129757	CDKN1C	HAVANA	gene	13	protein_coding	5.72347	6.9112	-1.18773	5.59265e-06	0.0010707	TRUE	FALSE
ENSG00000100867	DHRS2	HAVANA	gene	14	protein_coding	3.31556	1.92468	1.39088	5.56665e-06	0.0010707	TRUE	FALSE
ENSG00000100075	SLC25A1	HAVANA	gene	10	protein_coding	7.57412	6.50505	1.06907	5.50698e-06	0.0010707	TRUE	FALSE
ENSG00000185518	SV2B	HAVANA	gene	11	protein_coding	7.27501	5.81294	1.46207	5.84969e-06	0.00110344	TRUE	FALSE
ENSG00000188011	RTP5	HAVANA	gene	5	protein_coding	6.90389	5.82039	1.08349	6.27789e-06	0.00111796	TRUE	FALSE
ENSG00000250722	SELENOP	HAVANA	gene	6	protein_coding	7.79798	8.77986	-0.981879	6.44222e-06	0.00111796	FALSE	FALSE
ENSG00000203727	SAMD5	HAVANA	gene	4	protein_coding	4.87565	3.21314	1.66252	6.08033e-06	0.00111796	TRUE	FALSE
ENSG00000041515	MYO16	HAVANA	gene	16	protein_coding	4.83562	3.21586	1.61976	6.11892e-06	0.00111796	TRUE	FALSE
ENSG00000197971	MBP	HAVANA	gene	15	protein_coding	12.769	13.7916	-1.02257	6.30002e-06	0.00111796	TRUE	FALSE
ENSG00000169562	GJB1	HAVANA	gene	12	protein_coding	4.92419	6.11146	-1.18727	6.44958e-06	0.00111796	TRUE	FALSE
ENSG00000196352	CD55	HAVANA	gene	15	protein_coding	6.22041	5.25198	0.968434	6.869e-06	0.00115932	FALSE	FALSE
ENSG00000182379	NXPH4	HAVANA	gene	10	protein_coding	6.14152	4.72776	1.41376	6.86741e-06	0.00115932	TRUE	FALSE
ENSG00000206053	JPT2	HAVANA	gene	13	protein_coding	4.35285	5.44562	-1.09278	7.23296e-06	0.0012049	TRUE	FALSE
ENSG00000160767	FAM189B	HAVANA	gene	21	protein_coding	5.85206	4.79562	1.05643	7.49479e-06	0.00122758	TRUE	FALSE
ENSG00000156885	COX6A2	HAVANA	gene	6	protein_coding	3.33438	1.38389	1.95049	7.56051e-06	0.00122758	TRUE	FALSE
ENSG00000129682	FGF13	HAVANA	gene	16	protein_coding	8.22743	6.51136	1.71606	8.16177e-06	0.00130864	TRUE	FALSE
ENSG00000145248	SLC10A4	HAVANA	gene	7	protein_coding	7.4617	5.51323	1.94846	8.55659e-06	0.001355	TRUE	FALSE
ENSG00000164326	CARTPT	HAVANA	gene	5	protein_coding	6.81115	5.03665	1.7745	8.87512e-06	0.00137234	TRUE	FALSE
ENSG00000068903	SIRT2	HAVANA	gene	20	protein_coding	7.47992	8.21958	-0.739655	8.88003e-06	0.00137234	FALSE	FALSE
ENSG00000075420	FNDC3B	HAVANA	gene	13	protein_coding	5.3055	4.00383	1.30167	9.03334e-06	0.00137941	TRUE	FALSE
ENSG00000184156	KCNQ3	HAVANA	gene	17	protein_coding	6.71653	5.56447	1.15206	9.39767e-06	0.00141816	TRUE	FALSE
ENSG00000122679	RAMP3	HAVANA	gene	8	protein_coding	6.79003	5.77541	1.01462	9.58978e-06	0.00143033	TRUE	FALSE
ENSG00000137573	SULF1	HAVANA	gene	14	protein_coding	4.64116	3.61687	1.02429	9.79966e-06	0.00143396	TRUE	FALSE
ENSG00000182718	ANXA2	HAVANA	gene	16	protein_coding	7.53957	6.46199	1.07758	9.83772e-06	0.00143396	TRUE	FALSE
ENSG00000117419	ERI3	HAVANA	gene	16	protein_coding	8.20567	7.16538	1.04029	1.03414e-05	0.00149044	TRUE	FALSE
ENSG00000169554	ZEB2	HAVANA	gene	21	protein_coding	6.16355	7.06494	-0.901395	1.07845e-05	0.00153703	FALSE	FALSE
ENSG00000080822	CLDND1	HAVANA	gene	17	protein_coding	8.36954	9.15851	-0.788962	1.1618e-05	0.00163763	FALSE	FALSE
ENSG00000121764	HCRTR1	HAVANA	gene	11	protein_coding	3.76042	2.17254	1.58788	1.22418e-05	0.00168845	TRUE	FALSE
ENSG00000144868	TMEM108	HAVANA	gene	13	protein_coding	5.17475	3.82001	1.35473	1.21195e-05	0.00168845	TRUE	FALSE
ENSG00000242808	SOX2-OT	HAVANA	gene	9	lncRNA	7.46879	8.39559	-0.926801	1.26326e-05	0.00172382	FALSE	FALSE
ENSG00000160781	PAQR6	HAVANA	gene	17	protein_coding	8.53441	9.4392	-0.904792	1.4167e-05	0.00189849	FALSE	FALSE
ENSG00000156486	KCNS2	HAVANA	gene	8	protein_coding	3.5265	1.55128	1.97523	1.43559e-05	0.00189849	TRUE	FALSE
ENSG00000006116	CACNG3	HAVANA	gene	3	protein_coding	5.41101	3.95076	1.46025	1.43567e-05	0.00189849	TRUE	FALSE
ENSG00000167755	KLK6	HAVANA	gene	15	protein_coding	5.9531	7.01662	-1.06352	1.49122e-05	0.00195183	TRUE	FALSE
ENSG00000136541	ERMN	HAVANA	gene	14	protein_coding	7.02994	8.14416	-1.11422	1.51436e-05	0.00196209	TRUE	FALSE
ENSG00000183682	BMP8A	HAVANA	gene	8	protein_coding	1.0294	3.59561	-2.56621	1.55106e-05	0.00198955	TRUE	FALSE
ENSG00000013297	CLDN11	HAVANA	gene	11	protein_coding	6.95731	8.00012	-1.0428	1.57345e-05	0.00199401	TRUE	FALSE
ENSG00000152377	SPOCK1	HAVANA	gene	14	protein_coding	8.7759	7.68797	1.08793	1.58563e-05	0.00199401	TRUE	FALSE
ENSG00000132840	BHMT2	HAVANA	gene	10	protein_coding	3.81471	2.53169	1.28303	1.60832e-05	0.00200291	TRUE	FALSE
ENSG00000140479	PCSK6	HAVANA	gene	17	protein_coding	4.2457	5.66115	-1.41546	1.63791e-05	0.00202014	TRUE	FALSE
ENSG00000146555	SDK1	HAVANA	gene	19	protein_coding	3.79866	2.45572	1.34294	1.65595e-05	0.00202294	TRUE	FALSE
ENSG00000169116	PARM1	HAVANA	gene	11	protein_coding	7.21034	5.50844	1.7019	1.67459e-05	0.00202641	TRUE	FALSE
ENSG00000115353	TACR1	HAVANA	gene	11	protein_coding	5.12346	3.09865	2.0248	1.82485e-05	0.00218529	TRUE	FALSE
ENSG00000245293	AC096564.1	HAVANA	gene	3	lncRNA	3.37345	4.61556	-1.24211	1.88082e-05	0.00218529	TRUE	FALSE
ENSG00000173926	2023-03-03	HAVANA	gene	6	protein_coding	4.54762	3.71147	0.836155	1.85634e-05	0.00218529	FALSE	FALSE
ENSG00000277586	NEFL	HAVANA	gene	2	protein_coding	11.0971	9.68196	1.4151	1.89107e-05	0.00218529	TRUE	FALSE
ENSG00000176533	GNG7	HAVANA	gene	13	protein_coding	6.5192	7.31483	-0.795621	1.88677e-05	0.00218529	FALSE	FALSE
ENSG00000225206	MIR137HG	HAVANA	gene	10	lncRNA	3.65208	2.50843	1.14365	1.95459e-05	0.00223447	TRUE	FALSE
ENSG00000105808	RASA4	HAVANA	gene	17	protein_coding	2.32227	3.32709	-1.00482	1.96847e-05	0.00223447	TRUE	FALSE
ENSG00000171617	ENC1	HAVANA	gene	14	protein_coding	7.97588	6.55607	1.41982	2.00001e-05	0.00225037	TRUE	FALSE
ENSG00000128059	PPAT	HAVANA	gene	8	protein_coding	4.89622	4.0226	0.873626	2.04384e-05	0.00226064	FALSE	FALSE
ENSG00000126878	AIF1L	HAVANA	gene	13	protein_coding	6.47179	7.31736	-0.84557	2.0444e-05	0.00226064	FALSE	FALSE
ENSG00000104497	SNX16	HAVANA	gene	14	protein_coding	5.13265	3.94384	1.18881	2.07217e-05	0.00226863	TRUE	FALSE
ENSG00000149654	CDH22	HAVANA	gene	11	protein_coding	5.19854	3.7042	1.49434	2.08699e-05	0.00226863	TRUE	FALSE
ENSG00000152689	RASGRP3	HAVANA	gene	18	protein_coding	4.15186	5.28499	-1.13312	2.22795e-05	0.00231048	TRUE	FALSE
ENSG00000165424	ZCCHC24	HAVANA	gene	7	protein_coding	6.6297	7.33928	-0.709579	2.23187e-05	0.00231048	FALSE	FALSE
ENSG00000109099	PMP22	HAVANA	gene	15	protein_coding	6.88821	7.69441	-0.806204	2.19836e-05	0.00231048	FALSE	FALSE
ENSG00000108387	SEPTIN4	HAVANA	gene	15	protein_coding	7.56023	8.43194	-0.871708	2.17933e-05	0.00231048	FALSE	FALSE
ENSG00000125931	CITED1	HAVANA	gene	11	protein_coding	5.72324	3.83137	1.89186	2.23356e-05	0.00231048	TRUE	FALSE
ENSG00000123560	PLP1	HAVANA	gene	14	protein_coding	11.4109	12.4038	-0.992891	2.18249e-05	0.00231048	FALSE	FALSE
ENSG00000137575	SDCBP	HAVANA	gene	12	protein_coding	7.77802	7.02004	0.757987	2.29438e-05	0.0023544	FALSE	FALSE
ENSG00000100399	CHADL	HAVANA	gene	16	protein_coding	4.83578	5.7746	-0.938822	2.31472e-05	0.00235643	FALSE	FALSE
ENSG00000005513	SOX8	HAVANA	gene	10	protein_coding	6.07948	6.79599	-0.716512	2.34077e-05	0.00236418	FALSE	FALSE
ENSG00000171303	KCNK3	HAVANA	gene	7	protein_coding	6.56325	5.48011	1.08314	2.44515e-05	0.00243132	TRUE	FALSE
ENSG00000136867	SLC31A2	HAVANA	gene	11	protein_coding	4.79258	5.79426	-1.00168	2.43804e-05	0.00243132	TRUE	FALSE
ENSG00000108018	SORCS1	HAVANA	gene	15	protein_coding	4.13179	2.70704	1.42475	2.6119e-05	0.00257714	TRUE	FALSE
ENSG00000060982	BCAT1	HAVANA	gene	15	protein_coding	7.11788	5.93126	1.18663	2.73761e-05	0.00268056	TRUE	FALSE
ENSG00000138778	CENPE	HAVANA	gene	12	protein_coding	3.33718	1.6848	1.65238	2.87593e-05	0.00279467	TRUE	FALSE
ENSG00000169836	TACR3	HAVANA	gene	5	protein_coding	5.22535	4.00106	1.2243	2.90623e-05	0.00280287	TRUE	FALSE
ENSG00000065534	MYLK	HAVANA	gene	18	protein_coding	5.56284	6.55038	-0.987531	3.11237e-05	0.00285932	FALSE	FALSE
ENSG00000164124	TMEM144	HAVANA	gene	11	protein_coding	6.31172	7.34864	-1.03691	3.02976e-05	0.00285932	TRUE	FALSE
ENSG00000136099	PCDH8	HAVANA	gene	13	protein_coding	6.11499	4.69498	1.42001	2.99274e-05	0.00285932	TRUE	FALSE
ENSG00000128891	CCDC32	HAVANA	gene	15	protein_coding	5.64094	4.56429	1.07665	3.10103e-05	0.00285932	TRUE	FALSE
ENSG00000127511	SIN3B	HAVANA	gene	9	protein_coding	6.65718	5.7529	0.904272	3.09491e-05	0.00285932	FALSE	FALSE
ENSG00000183597	TANGO2	HAVANA	gene	16	protein_coding	6.03518	5.02725	1.00794	3.1138e-05	0.00285932	TRUE	FALSE
ENSG00000126950	TMEM35A	HAVANA	gene	8	protein_coding	7.60913	6.56567	1.04346	3.1208e-05	0.00285932	TRUE	FALSE
ENSG00000113734	BNIP1	HAVANA	gene	17	protein_coding	4.25666	3.28813	0.968528	3.20374e-05	0.00291449	FALSE	FALSE
ENSG00000132702	HAPLN2	HAVANA	gene	13	protein_coding	6.01116	7.31576	-1.3046	3.3068e-05	0.00294772	TRUE	FALSE
ENSG00000118242	MREG	HAVANA	gene	16	protein_coding	4.52754	3.07246	1.45508	3.3092e-05	0.00294772	TRUE	FALSE
ENSG00000114757	PEX5L	HAVANA	gene	19	protein_coding	5.3793	6.28163	-0.902335	3.27184e-05	0.00294772	FALSE	FALSE
ENSG00000160691	SHC1	HAVANA	gene	18	protein_coding	5.39908	4.46749	0.931587	3.41925e-05	0.0029779	FALSE	FALSE
ENSG00000081087	OSTM1	HAVANA	gene	15	protein_coding	6.44823	5.38436	1.06387	3.43595e-05	0.0029779	TRUE	FALSE
ENSG00000130707	ASS1	HAVANA	gene	18	protein_coding	6.77799	5.60281	1.17518	3.42079e-05	0.0029779	TRUE	FALSE
ENSG00000173786	CNP	HAVANA	gene	17	protein_coding	9.03385	9.86889	-0.835038	3.43489e-05	0.0029779	FALSE	FALSE
ENSG00000105695	MAG	HAVANA	gene	15	protein_coding	7.21523	8.35999	-1.14476	3.46058e-05	0.00297912	TRUE	FALSE
ENSG00000185909	KLHDC8B	HAVANA	gene	15	protein_coding	5.77833	4.70527	1.07306	3.50176e-05	0.00299447	TRUE	FALSE
ENSG00000092421	SEMA6A	HAVANA	gene	16	protein_coding	4.73958	5.4942	-0.754619	3.56815e-05	0.00303104	FALSE	FALSE
ENSG00000099960	SLC7A4	HAVANA	gene	13	protein_coding	5.41457	4.24296	1.17161	3.65102e-05	0.00308103	TRUE	FALSE
ENSG00000146352	CLVS2	HAVANA	gene	13	protein_coding	5.94009	4.89789	1.04219	3.70795e-05	0.00308521	TRUE	FALSE
ENSG00000170775	GPR37	HAVANA	gene	3	protein_coding	5.65927	6.61345	-0.954188	3.72814e-05	0.00308521	FALSE	FALSE
ENSG00000100644	HIF1A	HAVANA	gene	17	protein_coding	7.65539	6.94789	0.707495	3.7031e-05	0.00308521	FALSE	FALSE
ENSG00000183779	ZNF703	HAVANA	gene	7	protein_coding	5.15453	4.2647	0.889834	3.80134e-05	0.00310422	FALSE	FALSE
ENSG00000196730	DAPK1	HAVANA	gene	13	protein_coding	6.14883	4.96211	1.18672	3.8237e-05	0.00310422	TRUE	FALSE
ENSG00000102882	MAPK3	HAVANA	gene	12	protein_coding	8.29072	7.52731	0.763403	3.80647e-05	0.00310422	FALSE	FALSE
ENSG00000162852	CNST	HAVANA	gene	14	protein_coding	6.36706	5.27893	1.08813	3.93701e-05	0.00316139	TRUE	FALSE
ENSG00000235597	LINC01102	HAVANA	gene	2	lncRNA	1.56917	3.17782	-1.60865	3.99271e-05	0.00316139	TRUE	FALSE
ENSG00000106701	FSD1L	HAVANA	gene	12	protein_coding	5.89903	5.01784	0.88119	3.97936e-05	0.00316139	FALSE	FALSE
ENSG00000101282	RSPO4	HAVANA	gene	9	protein_coding	4.32579	3.03924	1.28654	3.96231e-05	0.00316139	TRUE	FALSE
ENSG00000109956	B3GAT1	HAVANA	gene	13	protein_coding	6.27809	7.14754	-0.86945	4.10451e-05	0.00322998	FALSE	FALSE
ENSG00000111907	TPD52L1	HAVANA	gene	21	protein_coding	6.5523	4.92412	1.62819	4.23981e-05	0.0033161	TRUE	FALSE
ENSG00000130962	PRRG1	HAVANA	gene	17	protein_coding	4.48412	5.33197	-0.847845	4.30541e-05	0.003347	FALSE	FALSE
ENSG00000160326	SLC2A6	HAVANA	gene	14	protein_coding	6.11785	5.181	0.936851	4.34294e-05	0.00335584	FALSE	FALSE
ENSG00000158859	ADAMTS4	HAVANA	gene	10	protein_coding	5.05625	6.2177	-1.16145	4.5179e-05	0.0034505	TRUE	FALSE
ENSG00000136237	RAPGEF5	HAVANA	gene	19	protein_coding	6.1341	6.91224	-0.778146	4.51925e-05	0.0034505	FALSE	FALSE
ENSG00000131386	GALNT15	HAVANA	gene	19	protein_coding	4.51122	5.47728	-0.966056	4.62263e-05	0.00348791	FALSE	FALSE
ENSG00000155506	LARP1	HAVANA	gene	17	protein_coding	8.31323	7.52036	0.79287	4.62185e-05	0.00348791	FALSE	FALSE
ENSG00000177551	NHLH2	HAVANA	gene	5	protein_coding	5.68406	4.56037	1.12369	4.78025e-05	0.00350378	TRUE	FALSE
ENSG00000139998	RAB15	HAVANA	gene	15	protein_coding	6.38562	5.06527	1.32034	4.77281e-05	0.00350378	TRUE	FALSE
ENSG00000186417	GLDN	HAVANA	gene	14	protein_coding	4.73035	5.61911	-0.888766	4.7213e-05	0.00350378	FALSE	FALSE
ENSG00000126860	EVI2A	HAVANA	gene	11	protein_coding	5.62625	6.55604	-0.92979	4.76243e-05	0.00350378	FALSE	FALSE
ENSG00000124302	CHST8	HAVANA	gene	13	protein_coding	5.13296	3.98637	1.14659	4.70967e-05	0.00350378	TRUE	FALSE
ENSG00000005884	ITGA3	HAVANA	gene	18	protein_coding	5.86081	4.95433	0.906481	4.88088e-05	0.00355722	FALSE	FALSE
ENSG00000186480	INSIG1	HAVANA	gene	13	protein_coding	8.138	7.35252	0.785481	5.07116e-05	0.00365103	FALSE	FALSE
ENSG00000148357	HMCN2	HAVANA	gene	16	protein_coding	3.81377	1.4066	2.40716	5.09499e-05	0.00365103	TRUE	FALSE
ENSG00000184221	OLIG1	HAVANA	gene	13	protein_coding	7.18378	8.10772	-0.923944	5.06311e-05	0.00365103	FALSE	FALSE
ENSG00000077522	ACTN2	HAVANA	gene	13	protein_coding	3.3222	4.39074	-1.06855	5.1799e-05	0.00367086	TRUE	FALSE
ENSG00000139641	ESYT1	HAVANA	gene	12	protein_coding	6.53196	5.57425	0.957708	5.17431e-05	0.00367086	FALSE	FALSE
ENSG00000197043	ANXA6	HAVANA	gene	14	protein_coding	8.81221	7.70956	1.10266	5.24059e-05	0.00367328	TRUE	FALSE
ENSG00000109084	TMEM97	HAVANA	gene	14	protein_coding	5.35727	4.27358	1.08369	5.22107e-05	0.00367328	TRUE	FALSE
ENSG00000160307	S100B	HAVANA	gene	10	protein_coding	9.92538	10.6312	-0.705774	5.32994e-05	0.00371561	FALSE	FALSE
ENSG00000140939	NOL3	HAVANA	gene	14	protein_coding	6.45119	5.43486	1.01633	5.37403e-05	0.00372609	TRUE	FALSE
ENSG00000196867	ZFP28	HAVANA	gene	8	protein_coding	4.95409	4.06539	0.888707	5.45252e-05	0.00376019	FALSE	FALSE
ENSG00000100884	CPNE6	HAVANA	gene	9	protein_coding	6.40549	5.58852	0.816974	5.53155e-05	0.00379429	FALSE	FALSE
ENSG00000196187	TMEM63A	HAVANA	gene	12	protein_coding	5.22718	6.31835	-1.09117	5.61183e-05	0.00380862	TRUE	FALSE
ENSG00000146122	DAAM2	HAVANA	gene	17	protein_coding	6.55231	7.47034	-0.918031	5.60793e-05	0.00380862	FALSE	FALSE
ENSG00000133083	DCLK1	HAVANA	gene	14	protein_coding	8.49252	7.49413	0.99839	5.68784e-05	0.00383989	FALSE	FALSE
ENSG00000169427	KCNK9	HAVANA	gene	8	protein_coding	5.95438	4.81888	1.13549	5.78013e-05	0.00386413	TRUE	FALSE
ENSG00000198431	TXNRD1	HAVANA	gene	16	protein_coding	6.70905	5.74398	0.965071	5.81412e-05	0.00386413	FALSE	FALSE
ENSG00000158865	SLC5A11	HAVANA	gene	12	protein_coding	3.58654	4.66027	-1.07373	5.78506e-05	0.00386413	TRUE	FALSE
ENSG00000076513	ANKRD13A	HAVANA	gene	17	protein_coding	3.25232	4.27614	-1.02382	5.87823e-05	0.00387474	TRUE	FALSE
ENSG00000124126	PREX1	HAVANA	gene	14	protein_coding	6.05499	6.79954	-0.744555	5.8905e-05	0.00387474	FALSE	FALSE
ENSG00000128283	CDC42EP1	HAVANA	gene	7	protein_coding	5.01156	5.98574	-0.974187	5.92476e-05	0.0038774	FALSE	FALSE
ENSG00000114993	RTKN	HAVANA	gene	17	protein_coding	4.73629	5.56266	-0.826371	6.0033e-05	0.00388911	FALSE	FALSE
ENSG00000136842	TMOD1	HAVANA	gene	14	protein_coding	4.64134	3.64084	1.0005	6.00214e-05	0.00388911	TRUE	FALSE
ENSG00000165152	TMEM246	HAVANA	gene	9	protein_coding	7.49122	6.55982	0.9314	6.18187e-05	0.00398467	FALSE	FALSE
ENSG00000106617	PRKAG2	HAVANA	gene	14	protein_coding	6.11213	5.16458	0.947557	6.23738e-05	0.00400034	FALSE	FALSE
ENSG00000012171	SEMA3B	HAVANA	gene	20	protein_coding	5.59831	6.58643	-0.988118	6.51782e-05	0.00415941	FALSE	FALSE
ENSG00000165349	SLC7A3	HAVANA	gene	12	protein_coding	3.44649	1.71119	1.7353	6.64003e-05	0.00421642	TRUE	FALSE
ENSG00000180834	MAP6D1	HAVANA	gene	7	protein_coding	5.30566	6.13952	-0.833866	6.70759e-05	0.00423834	FALSE	FALSE
ENSG00000159348	CYB5R1	HAVANA	gene	13	protein_coding	6.92824	5.85288	1.07536	6.92904e-05	0.00434579	TRUE	FALSE
ENSG00000078804	TP53INP2	HAVANA	gene	13	protein_coding	7.7016	8.61709	-0.915489	6.9454e-05	0.00434579	FALSE	FALSE
ENSG00000131979	GCH1	HAVANA	gene	19	protein_coding	5.77218	4.52272	1.24945	7.02726e-05	0.00437567	TRUE	FALSE
ENSG00000054690	PLEKHH1	HAVANA	gene	14	protein_coding	5.82426	6.71118	-0.886923	7.24139e-05	0.00448721	FALSE	FALSE
ENSG00000136267	DGKB	HAVANA	gene	13	protein_coding	5.24108	4.07142	1.16966	7.39172e-05	0.00452981	TRUE	FALSE
ENSG00000072041	SLC6A15	HAVANA	gene	17	protein_coding	7.1661	5.98653	1.17957	7.52201e-05	0.00452981	TRUE	FALSE
ENSG00000060709	RIMBP2	HAVANA	gene	15	protein_coding	6.10683	4.82515	1.28168	7.39687e-05	0.00452981	TRUE	FALSE
ENSG00000258986	TMEM179	HAVANA	gene	7	protein_coding	6.55667	5.38377	1.1729	7.50369e-05	0.00452981	TRUE	FALSE
ENSG00000011638	TMEM159	HAVANA	gene	10	protein_coding	4.41688	2.96652	1.45035	7.47932e-05	0.00452981	TRUE	FALSE
ENSG00000177469	CAVIN1	HAVANA	gene	13	protein_coding	4.86586	5.98259	-1.11673	7.41958e-05	0.00452981	TRUE	FALSE
ENSG00000184451	CCR10	HAVANA	gene	5	protein_coding	4.63359	2.85563	1.77796	7.61006e-05	0.00456142	TRUE	FALSE
ENSG00000174132	FAM174A	HAVANA	gene	9	protein_coding	6.48842	5.48984	0.99858	7.7956e-05	0.00462936	FALSE	FALSE
ENSG00000126803	HSPA2	HAVANA	gene	9	protein_coding	6.5502	7.43127	-0.881072	7.76867e-05	0.00462936	FALSE	FALSE
ENSG00000140105	WARS	HAVANA	gene	18	protein_coding	7.50087	6.35598	1.14489	7.93953e-05	0.00465465	TRUE	FALSE
ENSG00000267432	DNAH17-AS1	HAVANA	gene	6	lncRNA	1.90867	3.95742	-2.04876	7.94706e-05	0.00465465	TRUE	FALSE
ENSG00000198597	ZNF536	HAVANA	gene	9	protein_coding	3.63913	5.08053	-1.44139	7.87986e-05	0.00465465	TRUE	FALSE
ENSG00000139211	AMIGO2	HAVANA	gene	6	protein_coding	7.30123	6.00176	1.29948	7.98762e-05	0.00465714	TRUE	FALSE
ENSG00000181585	TMIE	HAVANA	gene	6	protein_coding	5.40785	4.20343	1.20442	8.09534e-05	0.00469859	TRUE	FALSE
ENSG00000078269	SYNJ2	HAVANA	gene	15	protein_coding	5.14195	6.21034	-1.06839	8.22177e-05	0.00470806	TRUE	FALSE
ENSG00000129538	RNASE1	HAVANA	gene	14	protein_coding	7.29722	8.25743	-0.960209	8.21813e-05	0.00470806	FALSE	FALSE
ENSG00000132205	EMILIN2	HAVANA	gene	11	protein_coding	2.92027	4.21501	-1.29473	8.22172e-05	0.00470806	TRUE	FALSE
ENSG00000106789	CORO2A	HAVANA	gene	13	protein_coding	4.57839	3.47886	1.09954	8.28696e-05	0.0047243	TRUE	FALSE
ENSG00000117115	PADI2	HAVANA	gene	13	protein_coding	6.84084	7.73199	-0.891147	8.53041e-05	0.00473747	FALSE	FALSE
ENSG00000153253	SCN3A	HAVANA	gene	18	protein_coding	6.57396	5.79924	0.774721	8.53969e-05	0.00473747	FALSE	FALSE
ENSG00000188848	BEND4	HAVANA	gene	16	protein_coding	3.61152	2.13421	1.47731	8.5743e-05	0.00473747	TRUE	FALSE
ENSG00000166348	USP54	HAVANA	gene	18	protein_coding	5.1465	5.89096	-0.74446	8.35331e-05	0.00473747	FALSE	FALSE
ENSG00000086205	FOLH1	HAVANA	gene	18	protein_coding	3.77557	4.9312	-1.15563	8.53705e-05	0.00473747	TRUE	FALSE
ENSG00000149295	DRD2	HAVANA	gene	14	protein_coding	5.21364	3.50534	1.7083	8.45518e-05	0.00473747	TRUE	FALSE
ENSG00000141526	SLC16A3	HAVANA	gene	16	protein_coding	6.02472	4.89042	1.1343	8.60553e-05	0.00473747	TRUE	FALSE
ENSG00000128335	APOL2	HAVANA	gene	14	protein_coding	6.77432	5.67764	1.09668	8.40822e-05	0.00473747	TRUE	FALSE
ENSG00000134115	CNTN6	HAVANA	gene	13	protein_coding	4.45985	3.01636	1.4435	8.68209e-05	0.0047592	TRUE	FALSE
ENSG00000259436	AC010247.2	HAVANA	gene	1	lncRNA	4.27926	2.60424	1.67502	8.85818e-05	0.00483506	TRUE	FALSE
ENSG00000091513	TF	HAVANA	gene	16	protein_coding	8.96344	9.92424	-0.960793	8.92397e-05	0.00485033	FALSE	FALSE
ENSG00000179178	TMEM125	HAVANA	gene	11	protein_coding	4.37009	5.41705	-1.04696	9.02673e-05	0.00486495	TRUE	FALSE
ENSG00000111667	USP5	HAVANA	gene	13	protein_coding	7.47902	6.67077	0.808248	8.99978e-05	0.00486495	FALSE	FALSE
ENSG00000165949	IFI27	HAVANA	gene	12	protein_coding	8.74291	7.62407	1.11884	9.11797e-05	0.00489356	TRUE	FALSE
ENSG00000102468	HTR2A	HAVANA	gene	10	protein_coding	4.97466	3.57527	1.39939	9.19627e-05	0.00491502	TRUE	FALSE
ENSG00000249242	TMEM150C	HAVANA	gene	8	protein_coding	5.65636	4.88629	0.770077	9.35703e-05	0.0049762	FALSE	FALSE
ENSG00000275074	NUDT18	HAVANA	gene	2	protein_coding	4.18278	2.81664	1.36614	9.38832e-05	0.0049762	TRUE	FALSE
ENSG00000100146	SOX10	HAVANA	gene	17	protein_coding	5.40779	6.31636	-0.908568	9.48003e-05	0.00500413	FALSE	FALSE
ENSG00000117984	CTSD	HAVANA	gene	14	protein_coding	9.75195	9.10194	0.650006	9.57637e-05	0.00502701	FALSE	FALSE
ENSG00000166912	MTMR10	HAVANA	gene	17	protein_coding	5.49395	6.23697	-0.743017	9.64261e-05	0.00502701	FALSE	FALSE
ENSG00000103089	FA2H	HAVANA	gene	9	protein_coding	5.30913	6.394	-1.08487	9.69975e-05	0.00502701	TRUE	FALSE
ENSG00000126247	CAPNS1	HAVANA	gene	11	protein_coding	8.89328	8.13269	0.760589	9.649e-05	0.00502701	FALSE	FALSE
ENSG00000120509	PDZD11	HAVANA	gene	10	protein_coding	6.64233	5.80155	0.840775	9.71932e-05	0.00502701	FALSE	FALSE
ENSG00000162188	GNG3	HAVANA	gene	6	protein_coding	8.92641	7.91966	1.00675	9.88605e-05	0.00508343	TRUE	FALSE
ENSG00000183044	ABAT	HAVANA	gene	12	protein_coding	9.06407	8.0841	0.979966	9.94731e-05	0.00508343	FALSE	FALSE
ENSG00000260664	AC004158.1	HAVANA	gene	2	lncRNA	2.60042	3.74811	-1.14769	9.9319e-05	0.00508343	TRUE	FALSE
ENSG00000100842	EFS	HAVANA	gene	13	protein_coding	4.53468	5.5097	-0.975029	0.000103767	0.00528183	FALSE	FALSE
ENSG00000143418	CERS2	HAVANA	gene	19	protein_coding	5.58286	6.53008	-0.947224	0.000106163	0.0053824	FALSE	FALSE
ENSG00000084731	KIF3C	HAVANA	gene	15	protein_coding	8.43459	7.37772	1.05687	0.000108239	0.00546054	TRUE	FALSE
ENSG00000005486	RHBDD2	HAVANA	gene	17	protein_coding	9.78248	9.0538	0.728676	0.000108915	0.00546054	FALSE	FALSE
ENSG00000106829	TLE4	HAVANA	gene	19	protein_coding	4.31285	5.30174	-0.988891	0.000108981	0.00546054	FALSE	FALSE
ENSG00000145526	CDH18	HAVANA	gene	12	protein_coding	6.02146	4.72215	1.29931	0.000111272	0.00548957	TRUE	FALSE
ENSG00000104435	STMN2	HAVANA	gene	13	protein_coding	10.7146	9.4673	1.24734	0.00011017	0.00548957	TRUE	FALSE
ENSG00000099282	TSPAN15	HAVANA	gene	10	protein_coding	4.16919	5.20496	-1.03576	0.00011072	0.00548957	TRUE	FALSE
ENSG00000070371	CLTCL1	HAVANA	gene	16	protein_coding	4.68075	3.4168	1.26396	0.000110987	0.00548957	TRUE	FALSE
ENSG00000226496	LINC00323	HAVANA	gene	3	lncRNA	3.05451	4.26718	-1.21268	0.000113089	0.0055578	TRUE	FALSE
ENSG00000266094	RASSF5	HAVANA	gene	8	protein_coding	4.3076	3.2544	1.05319	0.00011666	0.00562557	TRUE	FALSE
ENSG00000175416	CLTB	HAVANA	gene	13	protein_coding	8.35522	7.60741	0.747811	0.000116557	0.00562557	FALSE	FALSE
ENSG00000107562	CXCL12	HAVANA	gene	16	protein_coding	2.53327	4.13902	-1.60575	0.000116115	0.00562557	TRUE	FALSE
ENSG00000169181	GSG1L	HAVANA	gene	13	protein_coding	5.6258	4.58726	1.03855	0.000116057	0.00562557	TRUE	FALSE
ENSG00000004897	CDC27	HAVANA	gene	12	protein_coding	6.48699	5.69463	0.792363	0.000115982	0.00562557	FALSE	FALSE
ENSG00000080200	CRYBG3	HAVANA	gene	10	protein_coding	1.86037	3.68518	-1.82482	0.000117524	0.005646	TRUE	FALSE
ENSG00000086289	EPDR1	HAVANA	gene	12	protein_coding	8.37292	7.18792	1.185	0.000120023	0.00574456	TRUE	FALSE
ENSG00000015592	STMN4	HAVANA	gene	16	protein_coding	6.84554	7.65713	-0.811591	0.000121138	0.00577636	FALSE	FALSE
ENSG00000233639	PANTR1	HAVANA	gene	6	lncRNA	3.29634	4.42823	-1.13189	0.000124407	0.00582396	TRUE	FALSE
ENSG00000170153	RNF150	HAVANA	gene	11	protein_coding	5.40253	4.46989	0.932644	0.000123967	0.00582396	FALSE	FALSE
ENSG00000198478	SH3BGRL2	HAVANA	gene	8	protein_coding	6.89764	5.89216	1.00548	0.000123156	0.00582396	TRUE	FALSE
ENSG00000169122	FAM110B	HAVANA	gene	11	protein_coding	6.22742	5.36416	0.863261	0.000124276	0.00582396	FALSE	FALSE
ENSG00000196972	SMIM10L2B	HAVANA	gene	9	protein_coding	7.42041	6.52891	0.891501	0.000123843	0.00582396	FALSE	FALSE
ENSG00000072682	P4HA2	HAVANA	gene	18	protein_coding	5.10167	3.8998	1.20187	0.000126575	0.00588253	TRUE	FALSE
ENSG00000204323	SMIM5	HAVANA	gene	5	protein_coding	2.38117	3.82287	-1.4417	0.000126319	0.00588253	TRUE	FALSE
ENSG00000106211	HSPB1	HAVANA	gene	9	protein_coding	8.68251	7.98188	0.700623	0.000128511	0.00592952	FALSE	FALSE
ENSG00000150867	PIP4K2A	HAVANA	gene	14	protein_coding	6.68838	7.47063	-0.782253	0.000128198	0.00592952	FALSE	FALSE
ENSG00000221887	HMSD	HAVANA	gene	6	protein_coding	1.84579	3.37751	-1.53172	0.000130127	0.00596123	TRUE	FALSE
ENSG00000167037	SGSM1	HAVANA	gene	18	protein_coding	6.77737	5.69696	1.08041	0.000130116	0.00596123	TRUE	FALSE
ENSG00000057935	MTA3	HAVANA	gene	13	protein_coding	5.91915	4.8882	1.03095	0.000133479	0.00598379	TRUE	FALSE
ENSG00000112685	EXOC2	HAVANA	gene	14	protein_coding	5.08977	4.31513	0.774647	0.000132019	0.00598379	FALSE	FALSE
ENSG00000135525	MAP7	HAVANA	gene	18	protein_coding	5.4245	6.0923	-0.667792	0.000132762	0.00598379	FALSE	FALSE
ENSG00000196814	MVB12B	HAVANA	gene	15	protein_coding	5.75142	6.52411	-0.772688	0.000131879	0.00598379	FALSE	FALSE
ENSG00000011347	SYT7	HAVANA	gene	9	protein_coding	5.51265	4.68982	0.822838	0.000133885	0.00598379	FALSE	FALSE
ENSG00000135454	B4GALNT1	HAVANA	gene	14	protein_coding	6.3511	5.47231	0.878789	0.000132892	0.00598379	FALSE	FALSE
ENSG00000229891	LINC01315	HAVANA	gene	2	lncRNA	2.30309	3.89829	-1.59521	0.000133682	0.00598379	TRUE	FALSE
ENSG00000131016	AKAP12	HAVANA	gene	17	protein_coding	8.25667	7.19432	1.06235	0.000135219	0.0060224	TRUE	FALSE
ENSG00000239922	AC092958.1	HAVANA	gene	2	lncRNA	3.2941	4.46065	-1.16655	0.000142224	0.00631246	TRUE	FALSE
ENSG00000087116	ADAMTS2	HAVANA	gene	16	protein_coding	4.89539	3.38709	1.5083	0.000144451	0.00638922	TRUE	FALSE
ENSG00000157168	NRG1	HAVANA	gene	20	protein_coding	5.91262	4.82977	1.08285	0.000145661	0.00641298	TRUE	FALSE
ENSG00000183020	AP2A2	HAVANA	gene	13	protein_coding	7.6552	6.88993	0.765269	0.000145988	0.00641298	FALSE	FALSE
ENSG00000122126	OCRL	HAVANA	gene	17	protein_coding	7.16044	6.28683	0.873608	0.000146611	0.00641836	FALSE	FALSE
ENSG00000105245	NUMBL	HAVANA	gene	9	protein_coding	5.78983	5.06735	0.722489	0.000147286	0.006426	FALSE	FALSE
ENSG00000072274	TFRC	HAVANA	gene	13	protein_coding	6.50557	5.81266	0.692916	0.000149886	0.00645307	FALSE	FALSE
ENSG00000111846	GCNT2	HAVANA	gene	17	protein_coding	3.91282	2.634	1.27883	0.000149661	0.00645307	TRUE	FALSE
ENSG00000008441	NFIX	HAVANA	gene	16	protein_coding	6.18449	7.15106	-0.966565	0.000149045	0.00645307	FALSE	FALSE
ENSG00000147257	GPC3	HAVANA	gene	14	protein_coding	4.7051	3.09633	1.60877	0.000149919	0.00645307	TRUE	FALSE
ENSG00000132563	REEP2	HAVANA	gene	16	protein_coding	8.14544	7.29381	0.851632	0.00015115	0.0064843	FALSE	FALSE
ENSG00000165478	HEPACAM	HAVANA	gene	7	protein_coding	6.54331	7.37407	-0.830762	0.00015194	0.00649643	FALSE	FALSE
ENSG00000145362	ANK2	HAVANA	gene	19	protein_coding	9.4374	8.6556	0.781802	0.000153288	0.00653233	FALSE	FALSE
ENSG00000139116	KIF21A	HAVANA	gene	18	protein_coding	8.67788	7.77394	0.903939	0.000154218	0.0065502	FALSE	FALSE
ENSG00000159713	TPPP3	HAVANA	gene	11	protein_coding	7.97917	7.24062	0.738547	0.000154813	0.00655377	FALSE	FALSE
ENSG00000141522	ARHGDIA	HAVANA	gene	12	protein_coding	8.48376	7.80275	0.681008	0.000156642	0.00660937	FALSE	FALSE
ENSG00000109158	GABRA4	HAVANA	gene	11	protein_coding	1.37286	3.05781	-1.68495	0.000160873	0.00668457	TRUE	FALSE
ENSG00000104722	NEFM	HAVANA	gene	14	protein_coding	9.88955	8.65923	1.23033	0.000161927	0.00668457	TRUE	FALSE
ENSG00000107331	ABCA2	HAVANA	gene	17	protein_coding	7.23837	7.87333	-0.634963	0.000159671	0.00668457	FALSE	FALSE
ENSG00000059804	SLC2A3	HAVANA	gene	16	protein_coding	7.16984	6.27787	0.891976	0.000161771	0.00668457	FALSE	FALSE
ENSG00000198732	SMOC1	HAVANA	gene	10	protein_coding	5.5103	6.32287	-0.812567	0.000160483	0.00668457	FALSE	FALSE
ENSG00000105568	PPP2R1A	HAVANA	gene	18	protein_coding	9.32687	8.57287	0.754003	0.000162072	0.00668457	FALSE	FALSE
ENSG00000089199	CHGB	HAVANA	gene	10	protein_coding	9.11026	7.24474	1.86552	0.000161724	0.00668457	TRUE	FALSE
ENSG00000151491	EPS8	HAVANA	gene	14	protein_coding	5.55973	4.89887	0.660863	0.000162874	0.00669609	FALSE	FALSE
ENSG00000163513	TGFBR2	HAVANA	gene	18	protein_coding	4.05319	4.72611	-0.672918	0.000165155	0.00676818	FALSE	FALSE
ENSG00000100263	RHBDD3	HAVANA	gene	14	protein_coding	5.42047	4.51411	0.906369	0.000166235	0.00679075	FALSE	FALSE
ENSG00000177697	CD151	HAVANA	gene	19	protein_coding	6.63702	5.8932	0.743828	0.000166766	0.0067908	FALSE	FALSE
ENSG00000171094	ALK	HAVANA	gene	18	protein_coding	3.82302	2.3053	1.51773	0.000168125	0.00681055	TRUE	FALSE
ENSG00000224189	HAGLR	HAVANA	gene	8	lncRNA	2.62849	3.8985	-1.27002	0.000168843	0.00681055	TRUE	FALSE
ENSG00000127870	RNF6	HAVANA	gene	17	protein_coding	5.51379	4.82901	0.684779	0.000168801	0.00681055	FALSE	FALSE
ENSG00000177106	EPS8L2	HAVANA	gene	16	protein_coding	4.1162	5.07358	-0.95738	0.00017021	0.0068222	FALSE	FALSE
ENSG00000084453	SLCO1A2	HAVANA	gene	16	protein_coding	5.53619	6.31999	-0.7838	0.000170407	0.0068222	FALSE	FALSE
ENSG00000183454	GRIN2A	HAVANA	gene	17	protein_coding	5.6731	4.77106	0.902048	0.000170728	0.0068222	FALSE	FALSE
ENSG00000162456	KNCN	HAVANA	gene	9	protein_coding	3.34775	2.31127	1.03648	0.000172417	0.00685041	TRUE	FALSE
ENSG00000103154	NECAB2	HAVANA	gene	9	protein_coding	7.10246	5.94181	1.16066	0.000173036	0.00685041	TRUE	FALSE
ENSG00000142039	CCDC97	HAVANA	gene	4	protein_coding	2.85012	3.83478	-0.984659	0.000172559	0.00685041	FALSE	FALSE
ENSG00000070214	SLC44A1	HAVANA	gene	16	protein_coding	6.88615	7.66921	-0.78306	0.000174085	0.0068602	FALSE	FALSE
ENSG00000198382	UVRAG	HAVANA	gene	9	protein_coding	3.63723	4.51684	-0.879611	0.000174353	0.0068602	FALSE	FALSE
ENSG00000116584	ARHGEF2	HAVANA	gene	19	protein_coding	4.46885	5.21717	-0.748315	0.000178565	0.00699779	FALSE	FALSE
ENSG00000115468	EFHD1	HAVANA	gene	12	protein_coding	6.66002	7.19692	-0.536893	0.000178941	0.00699779	FALSE	FALSE
ENSG00000008196	TFAP2B	HAVANA	gene	13	protein_coding	5.69928	4.28211	1.41717	0.000180984	0.00705619	TRUE	FALSE
ENSG00000138593	SECISBP2L	HAVANA	gene	9	protein_coding	6.33913	6.9943	-0.655175	0.000182239	0.00708359	FALSE	FALSE
ENSG00000136068	FLNB	HAVANA	gene	14	protein_coding	4.56137	5.44191	-0.880534	0.000183005	0.00709187	FALSE	FALSE
ENSG00000141540	TTYH2	HAVANA	gene	11	protein_coding	6.78059	7.52079	-0.740205	0.000185725	0.00717557	FALSE	FALSE
ENSG00000104221	BRF2	HAVANA	gene	13	protein_coding	4.70612	3.84423	0.861894	0.000189176	0.00728695	FALSE	FALSE
ENSG00000081818	PCDHB4	HAVANA	gene	4	protein_coding	1.35926	2.99006	-1.6308	0.00019038	0.00731139	TRUE	FALSE
ENSG00000086300	SNX10	HAVANA	gene	15	protein_coding	8.50157	7.4765	1.02507	0.000193605	0.00740363	TRUE	FALSE
ENSG00000138835	RGS3	HAVANA	gene	22	protein_coding	6.10055	5.22969	0.870861	0.000193938	0.00740363	FALSE	FALSE
ENSG00000101220	C20orf27	HAVANA	gene	17	protein_coding	7.10169	6.27516	0.826532	0.000194513	0.00740363	FALSE	FALSE
ENSG00000162706	CADM3	HAVANA	gene	13	protein_coding	8.2983	7.57722	0.721087	0.000198406	0.00751467	FALSE	FALSE
ENSG00000107731	UNC5B	HAVANA	gene	12	protein_coding	3.4796	4.65914	-1.17954	0.000198743	0.00751467	TRUE	FALSE
ENSG00000127561	SYNGR3	HAVANA	gene	15	protein_coding	9.07598	8.13852	0.937459	0.000199774	0.00751467	FALSE	FALSE
ENSG00000103160	HSDL1	HAVANA	gene	12	protein_coding	7.22333	6.27345	0.949887	0.000199306	0.00751467	FALSE	FALSE
ENSG00000101958	GLRA2	HAVANA	gene	14	protein_coding	6.66137	5.48874	1.17263	0.00020052	0.00752069	TRUE	FALSE
ENSG00000116793	PHTF1	HAVANA	gene	16	protein_coding	5.57486	4.73228	0.842583	0.000203205	0.00755343	FALSE	FALSE
ENSG00000153250	RBMS1	HAVANA	gene	20	protein_coding	5.6441	4.82797	0.816127	0.000202438	0.00755343	FALSE	FALSE
ENSG00000112378	PERP	HAVANA	gene	12	protein_coding	5.39243	4.40143	0.991006	0.000203526	0.00755343	FALSE	FALSE
ENSG00000104093	DMXL2	HAVANA	gene	13	protein_coding	7.23297	6.23816	0.994809	0.000204338	0.00755343	FALSE	FALSE
ENSG00000128242	GAL3ST1	HAVANA	gene	13	protein_coding	4.85254	5.65402	-0.801478	0.000204126	0.00755343	FALSE	FALSE
ENSG00000231754	AL512380.1	HAVANA	gene	2	lncRNA	1.31601	2.78441	-1.4684	0.00020613	0.00757601	TRUE	FALSE
ENSG00000241697	TMEFF1	HAVANA	gene	5	protein_coding	7.19987	6.45984	0.740031	0.000205728	0.00757601	FALSE	FALSE
ENSG00000105355	PLIN3	HAVANA	gene	9	protein_coding	4.43305	5.45244	-1.01939	0.00020829	0.00763354	TRUE	FALSE
ENSG00000148082	SHC3	HAVANA	gene	10	protein_coding	4.68996	5.62638	-0.936414	0.000212069	0.00774987	FALSE	FALSE
ENSG00000173465	ZNRD2	HAVANA	gene	8	protein_coding	5.35911	4.30134	1.05777	0.000212957	0.00776023	TRUE	FALSE
ENSG00000006611	USH1C	HAVANA	gene	16	protein_coding	3.0344	4.63516	-1.60076	0.000213922	0.00777015	TRUE	FALSE
ENSG00000167588	GPD1	HAVANA	gene	13	protein_coding	4.30312	5.69152	-1.3884	0.000214441	0.00777015	TRUE	FALSE
ENSG00000213722	DDAH2	HAVANA	gene	9	protein_coding	4.45857	5.21461	-0.756038	0.000216574	0.00782533	FALSE	FALSE
ENSG00000162433	AK4	HAVANA	gene	15	protein_coding	6.76619	6.02631	0.739878	0.000219155	0.00789635	FALSE	FALSE
ENSG00000180440	SERTM1	HAVANA	gene	4	protein_coding	5.75081	4.02814	1.72266	0.000220174	0.00791085	TRUE	FALSE
ENSG00000105290	APLP1	HAVANA	gene	12	protein_coding	8.73963	9.39396	-0.654331	0.000225124	0.00806611	FALSE	FALSE
ENSG00000196368	NUDT11	HAVANA	gene	5	protein_coding	6.25466	5.34505	0.909608	0.000226106	0.00807873	FALSE	FALSE
ENSG00000184916	JAG2	HAVANA	gene	9	protein_coding	5.44875	4.77882	0.669926	0.000228825	0.00815317	FALSE	FALSE
ENSG00000164061	BSN	HAVANA	gene	5	protein_coding	6.32173	5.414	0.907728	0.000231248	0.00819399	FALSE	FALSE
ENSG00000175166	PSMD2	HAVANA	gene	17	protein_coding	8.07863	7.37647	0.702156	0.000230624	0.00819399	FALSE	FALSE
ENSG00000138107	ACTR1A	HAVANA	gene	13	protein_coding	7.86335	7.12579	0.737563	0.000232367	0.00821093	FALSE	FALSE
ENSG00000198835	GJC2	HAVANA	gene	4	protein_coding	4.81925	5.99827	-1.17903	0.00023557	0.00827266	TRUE	FALSE
ENSG00000119314	PTBP3	HAVANA	gene	15	protein_coding	4.9975	4.04788	0.949622	0.000236049	0.00827266	FALSE	FALSE
ENSG00000168589	DYNLRB2	HAVANA	gene	15	protein_coding	1.44448	3.40329	-1.95881	0.000235882	0.00827266	TRUE	FALSE
ENSG00000254656	RTL1	HAVANA	gene	2	protein_coding	4.31626	3.12029	1.19597	0.000239627	0.00837519	TRUE	FALSE
ENSG00000072201	LNX1	HAVANA	gene	14	protein_coding	4.46601	3.48644	0.979564	0.000241778	0.00842742	FALSE	FALSE
ENSG00000100379	KCTD17	HAVANA	gene	17	protein_coding	6.37392	5.65048	0.723439	0.000244412	0.00849614	FALSE	FALSE
ENSG00000054356	PTPRN	HAVANA	gene	14	protein_coding	9.00834	8.15353	0.854809	0.000247149	0.00854043	FALSE	FALSE
ENSG00000232352	SEMA3B-AS1	HAVANA	gene	1	lncRNA	1.99313	3.34304	-1.34991	0.000246772	0.00854043	TRUE	FALSE
ENSG00000172548	NIPAL4	HAVANA	gene	14	protein_coding	1.46653	3.08354	-1.61701	0.000247684	0.00854043	TRUE	FALSE
ENSG00000197586	ENTPD6	HAVANA	gene	13	protein_coding	7.40069	6.66548	0.735212	0.000249321	0.00857383	FALSE	FALSE
ENSG00000143324	XPR1	HAVANA	gene	14	protein_coding	6.16807	5.57633	0.591738	0.000253152	0.0086823	FALSE	FALSE
ENSG00000172508	CARNS1	HAVANA	gene	10	protein_coding	6.54409	7.56517	-1.02107	0.000255149	0.00872361	TRUE	FALSE
ENSG00000124145	SDC4	HAVANA	gene	6	protein_coding	6.6198	7.32069	-0.700888	0.000255717	0.00872361	FALSE	FALSE
ENSG00000184672	RALYL	HAVANA	gene	12	protein_coding	7.25355	6.41885	0.834708	0.000262743	0.00893955	FALSE	FALSE
ENSG00000124357	NAGK	HAVANA	gene	13	protein_coding	6.79982	6.0136	0.786223	0.000263479	0.00894085	FALSE	FALSE
ENSG00000104419	NDRG1	HAVANA	gene	14	protein_coding	7.4704	8.09743	-0.627028	0.000265151	0.00894263	FALSE	FALSE
ENSG00000185559	DLK1	HAVANA	gene	16	protein_coding	8.33036	6.9244	1.40595	0.000265623	0.00894263	TRUE	FALSE
ENSG00000268089	GABRQ	HAVANA	gene	3	protein_coding	6.44755	4.93421	1.51335	0.00026561	0.00894263	TRUE	FALSE
ENSG00000119922	IFIT2	HAVANA	gene	10	protein_coding	3.70561	4.50047	-0.794862	0.000267039	0.00896679	FALSE	FALSE
ENSG00000111799	COL12A1	HAVANA	gene	21	protein_coding	1.35766	3.09358	-1.73592	0.000269348	0.00899847	TRUE	FALSE
ENSG00000077782	FGFR1	HAVANA	gene	20	protein_coding	7.51571	6.60565	0.910054	0.000269386	0.00899847	FALSE	FALSE
ENSG00000141542	RAB40B	HAVANA	gene	11	protein_coding	5.87828	6.51317	-0.634889	0.000270222	0.00900295	FALSE	FALSE
ENSG00000144681	STAC	HAVANA	gene	10	protein_coding	4.24068	2.8456	1.39508	0.000275295	0.00905351	TRUE	FALSE
ENSG00000170271	FAXDC2	HAVANA	gene	11	protein_coding	5.52364	6.35711	-0.833475	0.000276442	0.00905351	FALSE	FALSE
ENSG00000147416	ATP6V1B2	HAVANA	gene	11	protein_coding	9.07239	8.02766	1.04472	0.000276309	0.00905351	TRUE	FALSE
ENSG00000171681	ATF7IP	HAVANA	gene	12	protein_coding	3.92441	4.84127	-0.916856	0.000276628	0.00905351	FALSE	FALSE
ENSG00000127324	TSPAN8	HAVANA	gene	9	protein_coding	1.77077	3.82424	-2.05348	0.00027668	0.00905351	TRUE	FALSE
ENSG00000065717	TLE2	HAVANA	gene	15	protein_coding	3.46384	4.51133	-1.04749	0.000275228	0.00905351	TRUE	FALSE
ENSG00000092758	COL9A3	HAVANA	gene	18	protein_coding	4.62295	5.5175	-0.894547	0.000273654	0.00905351	FALSE	FALSE
ENSG00000100034	PPM1F	HAVANA	gene	14	protein_coding	5.72678	5.09584	0.63094	0.00027997	0.00913784	FALSE	FALSE
ENSG00000010282	HHATL	HAVANA	gene	15	protein_coding	6.08301	6.8736	-0.790591	0.000285629	0.00922862	FALSE	FALSE
ENSG00000145730	PAM	HAVANA	gene	20	protein_coding	8.47913	7.46513	1.014	0.000285508	0.00922862	TRUE	FALSE
ENSG00000277494	GPIHBP1	HAVANA	gene	2	protein_coding	3.62407	4.72495	-1.10088	0.000284556	0.00922862	TRUE	FALSE
ENSG00000099814	CEP170B	HAVANA	gene	16	protein_coding	7.14754	6.42602	0.721522	0.000284208	0.00922862	FALSE	FALSE
ENSG00000204310	AGPAT1	HAVANA	gene	13	protein_coding	7.06821	6.44152	0.626694	0.000286705	0.00924012	FALSE	FALSE
ENSG00000198917	SPOUT1	HAVANA	gene	13	protein_coding	3.68377	4.48255	-0.79878	0.000288146	0.00926329	FALSE	FALSE
ENSG00000167775	CD320	HAVANA	gene	11	protein_coding	6.71591	6.05057	0.665347	0.000292281	0.00937271	FALSE	FALSE
ENSG00000207955	AL359091.1	HAVANA	gene	5	lncRNA	4.53979	5.71074	-1.17095	0.000293154	0.00937727	TRUE	FALSE
ENSG00000121410	A1BG	HAVANA	gene	12	protein_coding	3.70293	4.7081	-1.00518	0.000293997	0.00938086	TRUE	FALSE
ENSG00000119280	C1orf198	HAVANA	gene	16	protein_coding	6.05049	6.67355	-0.623062	0.00029724	0.00941408	FALSE	FALSE
ENSG00000180660	MAB21L1	HAVANA	gene	8	protein_coding	5.00621	3.87448	1.13173	0.000296456	0.00941408	TRUE	FALSE
ENSG00000103811	CTSH	HAVANA	gene	16	protein_coding	4.89968	5.48555	-0.585872	0.000297047	0.00941408	FALSE	FALSE
ENSG00000130477	UNC13A	HAVANA	gene	15	protein_coding	6.10756	5.1521	0.955465	0.000298882	0.00944275	FALSE	FALSE
ENSG00000172005	MAL	HAVANA	gene	11	protein_coding	6.49909	7.08219	-0.583097	0.000304181	0.00958655	FALSE	FALSE
ENSG00000108309	RUNDC3A	HAVANA	gene	14	protein_coding	8.06302	7.41241	0.650608	0.000304973	0.00958797	FALSE	FALSE
ENSG00000157368	IL34	HAVANA	gene	10	protein_coding	5.04045	4.06482	0.975625	0.000309542	0.0097078	FALSE	FALSE
ENSG00000182600	SNORC	HAVANA	gene	9	protein_coding	7.10655	7.9746	-0.868053	0.000314613	0.00972643	FALSE	FALSE
ENSG00000152503	TRIM36	HAVANA	gene	9	protein_coding	6.74335	5.82589	0.917469	0.000311847	0.00972643	FALSE	FALSE
ENSG00000065809	FAM107B	HAVANA	gene	13	protein_coding	5.17232	6.35424	-1.18191	0.000314685	0.00972643	TRUE	FALSE
ENSG00000168056	LTBP3	HAVANA	gene	16	protein_coding	5.70864	6.45087	-0.742227	0.000312682	0.00972643	FALSE	FALSE
ENSG00000102934	PLLP	HAVANA	gene	10	protein_coding	6.00727	6.8047	-0.797432	0.000312757	0.00972643	FALSE	FALSE
ENSG00000128285	MCHR1	HAVANA	gene	4	protein_coding	4.08056	2.67114	1.40942	0.00031331	0.00972643	TRUE	FALSE
ENSG00000166292	TMEM100	HAVANA	gene	12	protein_coding	4.29623	3.47278	0.823446	0.000315602	0.00973131	FALSE	FALSE
ENSG00000237491	LINC01409	HAVANA	gene	10	lncRNA	1.40879	2.85153	-1.44273	0.000319886	0.0097928	TRUE	FALSE
ENSG00000150510	FAM124A	HAVANA	gene	16	protein_coding	4.05745	4.95813	-0.900681	0.000319519	0.0097928	FALSE	FALSE
ENSG00000002919	SNX11	HAVANA	gene	14	protein_coding	5.03121	4.2357	0.795506	0.000318798	0.0097928	FALSE	FALSE
ENSG00000128567	PODXL	HAVANA	gene	17	protein_coding	4.8264	5.79389	-0.967493	0.000322402	0.00984632	FALSE	FALSE
ENSG00000162517	PEF1	HAVANA	gene	13	protein_coding	6.58725	5.85485	0.732397	0.000325602	0.00987353	FALSE	FALSE
ENSG00000204655	MOG	HAVANA	gene	12	protein_coding	5.2645	6.56418	-1.29968	0.000325537	0.00987353	TRUE	FALSE
ENSG00000107130	NCS1	HAVANA	gene	10	protein_coding	8.38719	7.66492	0.722268	0.000324601	0.00987353	FALSE	FALSE
ENSG00000162769	FLVCR1	HAVANA	gene	13	protein_coding	5.49499	4.76672	0.728266	0.000327175	0.00987452	FALSE	FALSE
ENSG00000176381	PRR18	HAVANA	gene	6	protein_coding	5.014	5.74631	-0.732311	0.000327069	0.00987452	FALSE	FALSE
ENSG00000101144	BMP7	HAVANA	gene	13	protein_coding	4.99097	5.69392	-0.702946	0.000329434	0.00991936	FALSE	FALSE
ENSG00000148356	LRSAM1	HAVANA	gene	13	protein_coding	5.64687	4.79847	0.848398	0.000330312	0.00992251	FALSE	FALSE
ENSG00000175182	FAM131A	HAVANA	gene	15	protein_coding	6.53127	5.71652	0.814746	0.000332326	0.00995968	FALSE	FALSE
ENSG00000123352	SPATS2	HAVANA	gene	17	protein_coding	4.86593	3.93515	0.930786	0.000334245	0.00999385	FALSE	FALSE
ENSG00000152932	RAB3C	HAVANA	gene	8	protein_coding	8.74642	7.51452	1.2319	0.000337805	0.010016	TRUE	FALSE
ENSG00000027847	B4GALT7	HAVANA	gene	14	protein_coding	5.50803	4.75325	0.754777	0.000337709	0.010016	FALSE	FALSE
ENSG00000152578	GRIA4	HAVANA	gene	13	protein_coding	7.42216	6.64952	0.77264	0.000336093	0.010016	FALSE	FALSE
ENSG00000232560	LINC01549	HAVANA	gene	7	lncRNA	2.19644	3.77661	-1.58017	0.000338109	0.010016	TRUE	FALSE
ENSG00000272398	CD24	HAVANA	gene	6	protein_coding	4.43131	5.58868	-1.15737	0.000339151	0.0100237	TRUE	FALSE
ENSG00000113805	CNTN3	HAVANA	gene	8	protein_coding	4.26353	3.40486	0.858672	0.000341994	0.0100845	FALSE	FALSE
ENSG00000166557	TMED3	HAVANA	gene	13	protein_coding	6.06061	5.2155	0.845115	0.00034411	0.0101236	FALSE	FALSE
ENSG00000157827	FMNL2	HAVANA	gene	20	protein_coding	6.81296	7.45143	-0.638463	0.000345819	0.0101506	FALSE	FALSE
ENSG00000177239	MAN1B1	HAVANA	gene	15	protein_coding	6.31891	5.80879	0.510121	0.000349792	0.0102204	FALSE	FALSE
ENSG00000046653	GPM6B	HAVANA	gene	15	protein_coding	9.39508	9.96961	-0.574529	0.000349695	0.0102204	FALSE	FALSE
ENSG00000187634	SAMD11	HAVANA	gene	12	protein_coding	4.77561	3.45197	1.32364	0.000352	0.0102277	TRUE	FALSE
ENSG00000185634	SHC4	HAVANA	gene	12	protein_coding	2.04886	3.56661	-1.51775	0.000352433	0.0102277	TRUE	FALSE
ENSG00000249709	ZNF564	HAVANA	gene	8	protein_coding	1.27407	2.93746	-1.6634	0.000352062	0.0102277	TRUE	FALSE
ENSG00000110888	CAPRIN2	HAVANA	gene	17	protein_coding	6.32435	5.38709	0.937265	0.000364604	0.0105096	FALSE	FALSE
ENSG00000139433	GLTP	HAVANA	gene	10	protein_coding	5.38715	6.2195	-0.832349	0.00036402	0.0105096	FALSE	FALSE
ENSG00000282885	AL627171.2	HAVANA	gene	2	lncRNA	8.47155	9.41242	-0.940873	0.000362974	0.0105096	FALSE	FALSE
ENSG00000081760	AACS	HAVANA	gene	17	protein_coding	5.38365	4.53211	0.851534	0.000366788	0.0105253	FALSE	FALSE
ENSG00000153406	NMRAL1	HAVANA	gene	13	protein_coding	5.9217	5.35616	0.565541	0.000366375	0.0105253	FALSE	FALSE
ENSG00000258947	TUBB3	HAVANA	gene	7	protein_coding	10.1149	8.9871	1.12777	0.000368362	0.0105468	TRUE	FALSE
ENSG00000140280	LYSMD2	HAVANA	gene	14	protein_coding	6.96581	6.11565	0.850155	0.000371241	0.0106056	FALSE	FALSE
ENSG00000138092	CENPO	HAVANA	gene	11	protein_coding	3.77523	2.67644	1.09879	0.000375881	0.0107118	TRUE	FALSE
ENSG00000198467	TPM2	HAVANA	gene	15	protein_coding	3.74271	4.9152	-1.17249	0.00037663	0.0107118	TRUE	FALSE
ENSG00000260788	AC009063.2	HAVANA	gene	6	lncRNA	1.27101	3.21967	-1.94867	0.00037928	0.0107633	TRUE	FALSE
ENSG00000137713	PPP2R1B	HAVANA	gene	16	protein_coding	4.49294	3.8101	0.682838	0.000382346	0.0108264	FALSE	FALSE
ENSG00000188342	GTF2F2	HAVANA	gene	12	protein_coding	4.64922	5.29544	-0.646223	0.000384635	0.0108672	FALSE	FALSE
ENSG00000154678	PDE1C	HAVANA	gene	18	protein_coding	3.6696	4.7397	-1.0701	0.000390498	0.0110086	TRUE	FALSE
ENSG00000134884	ARGLU1	HAVANA	gene	15	protein_coding	5.86933	6.70098	-0.831653	0.000400549	0.0112672	FALSE	FALSE
ENSG00000118785	SPP1	HAVANA	gene	14	protein_coding	8.18288	9.11006	-0.927172	0.000403982	0.0112697	FALSE	FALSE
ENSG00000105835	NAMPT	HAVANA	gene	12	protein_coding	6.47413	5.50139	0.972738	0.000402797	0.0112697	FALSE	FALSE
ENSG00000176485	PLAAT3	HAVANA	gene	11	protein_coding	6.75587	7.30675	-0.550883	0.000403397	0.0112697	FALSE	FALSE
ENSG00000261325	LINC02192	HAVANA	gene	1	lncRNA	4.5802	2.96786	1.61234	0.000404153	0.0112697	TRUE	FALSE
ENSG00000153933	DGKE	HAVANA	gene	10	protein_coding	5.11639	4.41943	0.696959	0.000406943	0.0113229	FALSE	FALSE
ENSG00000274015	AL136038.5	HAVANA	gene	2	lncRNA	3.10139	4.12751	-1.02611	0.000414435	0.011501	TRUE	FALSE
ENSG00000167969	ECI1	HAVANA	gene	13	protein_coding	5.52114	6.08652	-0.565384	0.000416032	0.011501	FALSE	FALSE
ENSG00000173482	PTPRM	HAVANA	gene	16	protein_coding	7.25268	6.45873	0.793948	0.000415864	0.011501	FALSE	FALSE
ENSG00000272573	MUSTN1	HAVANA	gene	6	protein_coding	4.10896	5.27886	-1.1699	0.00041891	0.0115556	TRUE	FALSE
ENSG00000133019	CHRM3	HAVANA	gene	11	protein_coding	2.13418	3.62486	-1.49069	0.000423654	0.0115868	TRUE	FALSE
ENSG00000144635	DYNC1LI1	HAVANA	gene	9	protein_coding	6.61771	5.62053	0.997172	0.000423327	0.0115868	FALSE	FALSE
ENSG00000127946	HIP1	HAVANA	gene	17	protein_coding	4.26236	4.96052	-0.69816	0.000422795	0.0115868	FALSE	FALSE
ENSG00000157224	CLDN12	HAVANA	gene	16	protein_coding	5.36055	4.70915	0.651404	0.000422303	0.0115868	FALSE	FALSE
ENSG00000104313	EYA1	HAVANA	gene	20	protein_coding	1.52985	2.94618	-1.41633	0.00042799	0.0116805	TRUE	FALSE
ENSG00000167972	ABCA3	HAVANA	gene	14	protein_coding	6.92751	6.28871	0.638802	0.000430272	0.0117178	FALSE	FALSE
ENSG00000244968	LIFR-AS1	HAVANA	gene	7	lncRNA	1.57089	2.9049	-1.33401	0.000438058	0.0118462	TRUE	FALSE
ENSG00000197355	UAP1L1	HAVANA	gene	11	protein_coding	2.50973	3.6039	-1.09417	0.000438164	0.0118462	TRUE	FALSE
ENSG00000151490	PTPRO	HAVANA	gene	14	protein_coding	5.49145	4.30477	1.18668	0.000438678	0.0118462	TRUE	FALSE
ENSG00000124191	TOX2	HAVANA	gene	18	protein_coding	5.37415	4.46524	0.908914	0.000436998	0.0118462	FALSE	FALSE
ENSG00000284642	AL139424.2	HAVANA	gene	1	lncRNA	4.42679	3.57856	0.848225	0.000440977	0.0118832	FALSE	FALSE
ENSG00000185519	FAM131C	HAVANA	gene	9	protein_coding	4.59018	5.46107	-0.870897	0.000444937	0.0119648	FALSE	FALSE
ENSG00000115232	ITGA4	HAVANA	gene	14	protein_coding	3.57003	2.17238	1.39766	0.000446028	0.0119691	TRUE	FALSE
ENSG00000148411	NACC2	HAVANA	gene	8	protein_coding	6.7192	7.33806	-0.618869	0.000454107	0.0121604	FALSE	FALSE
ENSG00000113161	HMGCR	HAVANA	gene	16	protein_coding	7.1055	6.30561	0.799892	0.000456752	0.0122058	FALSE	FALSE
ENSG00000130787	HIP1R	HAVANA	gene	14	protein_coding	6.01363	6.72334	-0.70971	0.000457801	0.0122084	FALSE	FALSE
ENSG00000176887	SOX11	HAVANA	gene	7	protein_coding	2.35884	3.61889	-1.26005	0.000463674	0.0122883	TRUE	FALSE
ENSG00000213523	SRA1	HAVANA	gene	10	protein_coding	6.14411	5.48375	0.660361	0.000463091	0.0122883	FALSE	FALSE
ENSG00000104490	NCALD	HAVANA	gene	18	protein_coding	7.50474	6.74265	0.762089	0.000462088	0.0122883	FALSE	FALSE
ENSG00000159363	ATP13A2	HAVANA	gene	18	protein_coding	8.20358	7.37149	0.832082	0.000473549	0.0125022	FALSE	FALSE
ENSG00000160570	DEDD2	HAVANA	gene	14	protein_coding	5.6776	4.82255	0.85505	0.000473692	0.0125022	FALSE	FALSE
ENSG00000198822	GRM3	HAVANA	gene	10	protein_coding	5.26187	5.96398	-0.702117	0.000477669	0.0125376	FALSE	FALSE
ENSG00000107282	APBA1	HAVANA	gene	8	protein_coding	7.20174	6.48648	0.715261	0.000477967	0.0125376	FALSE	FALSE
ENSG00000148606	POLR3A	HAVANA	gene	13	protein_coding	4.74787	3.85275	0.895119	0.000476712	0.0125376	FALSE	FALSE
ENSG00000008277	ADAM22	HAVANA	gene	14	protein_coding	6.62519	5.79633	0.828861	0.000481076	0.012547	FALSE	FALSE
ENSG00000004799	PDK4	HAVANA	gene	8	protein_coding	4.20654	5.26065	-1.05411	0.000481259	0.012547	TRUE	FALSE
ENSG00000103449	SALL1	HAVANA	gene	11	protein_coding	4.53313	5.36622	-0.833092	0.000480488	0.012547	FALSE	FALSE
ENSG00000092529	CAPN3	HAVANA	gene	24	protein_coding	5.72485	6.74005	-1.0152	0.000484184	0.0125976	TRUE	FALSE
ENSG00000158352	SHROOM4	HAVANA	gene	15	protein_coding	2.47797	3.83641	-1.35844	0.000487278	0.0126525	TRUE	FALSE
ENSG00000066322	ELOVL1	HAVANA	gene	15	protein_coding	6.35171	7.12896	-0.777249	0.000492162	0.0127278	FALSE	FALSE
ENSG00000135362	PRR5L	HAVANA	gene	14	protein_coding	2.7679	4.20394	-1.43604	0.000492014	0.0127278	TRUE	FALSE
ENSG00000130164	LDLR	HAVANA	gene	13	protein_coding	5.40698	4.84377	0.56321	0.000495899	0.0127986	FALSE	FALSE
ENSG00000019144	PHLDB1	HAVANA	gene	19	protein_coding	5.87586	6.53718	-0.661315	0.000496913	0.012799	FALSE	FALSE
ENSG00000100580	TMED8	HAVANA	gene	8	protein_coding	6.355	5.61294	0.74206	0.000503706	0.012948	FALSE	FALSE
ENSG00000184160	ADRA2C	HAVANA	gene	8	protein_coding	3.8341	2.76989	1.06421	0.000507537	0.0130203	TRUE	FALSE
ENSG00000164530	PI16	HAVANA	gene	15	protein_coding	2.89811	3.84356	-0.94545	0.000516477	0.0131969	FALSE	FALSE
ENSG00000124920	MYRF	HAVANA	gene	13	protein_coding	6.29874	7.2147	-0.915958	0.000515767	0.0131969	FALSE	FALSE
ENSG00000112972	HMGCS1	HAVANA	gene	15	protein_coding	8.46062	7.60282	0.857803	0.00051953	0.0132296	FALSE	FALSE
ENSG00000183864	TOB2	HAVANA	gene	5	protein_coding	4.61648	5.31117	-0.69469	0.000519818	0.0132296	FALSE	FALSE
ENSG00000092445	TYRO3	HAVANA	gene	12	protein_coding	5.25943	5.93957	-0.680136	0.000521564	0.0132343	FALSE	FALSE
ENSG00000069329	VPS35	HAVANA	gene	18	protein_coding	8.18477	7.42423	0.760547	0.000523097	0.0132343	FALSE	FALSE
ENSG00000125505	MBOAT7	HAVANA	gene	17	protein_coding	8.43667	7.78514	0.651523	0.000522819	0.0132343	FALSE	FALSE
ENSG00000119973	PRLHR	HAVANA	gene	6	protein_coding	5.12173	3.90921	1.21251	0.000525679	0.0132734	TRUE	FALSE
ENSG00000011677	GABRA3	HAVANA	gene	13	protein_coding	5.70892	4.67579	1.03313	0.000529943	0.0133548	TRUE	FALSE
ENSG00000141524	TMC6	HAVANA	gene	15	protein_coding	4.5307	5.27488	-0.74418	0.00053655	0.0134948	FALSE	FALSE
ENSG00000175305	CCNE2	HAVANA	gene	17	protein_coding	2.41169	3.81481	-1.40312	0.00053892	0.0135014	TRUE	FALSE
ENSG00000002834	LASP1	HAVANA	gene	18	protein_coding	7.11519	6.4668	0.648386	0.000538511	0.0135014	FALSE	FALSE
ENSG00000113657	DPYSL3	HAVANA	gene	13	protein_coding	7.7887	7.22288	0.565823	0.000541683	0.0135095	FALSE	FALSE
ENSG00000067715	SYT1	HAVANA	gene	14	protein_coding	9.72024	8.59294	1.1273	0.000543194	0.0135095	TRUE	FALSE
ENSG00000006042	TMEM98	HAVANA	gene	12	protein_coding	3.89714	5.13858	-1.24144	0.000541956	0.0135095	TRUE	FALSE
ENSG00000126947	ARMCX1	HAVANA	gene	13	protein_coding	6.36978	5.55535	0.814425	0.000543457	0.0135095	FALSE	FALSE
ENSG00000139737	SLAIN1	HAVANA	gene	22	protein_coding	6.59207	7.29404	-0.701974	0.00055141	0.0136807	FALSE	FALSE
ENSG00000162639	HENMT1	HAVANA	gene	16	protein_coding	5.4203	4.64903	0.771269	0.000555145	0.0137468	FALSE	FALSE
ENSG00000084710	EFR3B	HAVANA	gene	14	protein_coding	7.65171	6.85768	0.794029	0.000557567	0.0137537	FALSE	FALSE
ENSG00000100320	RBFOX2	HAVANA	gene	23	protein_coding	7.41996	6.71977	0.700196	0.000556704	0.0137537	FALSE	FALSE
ENSG00000075945	KIFAP3	HAVANA	gene	13	protein_coding	8.43004	7.63403	0.796014	0.00056048	0.013799	FALSE	FALSE
ENSG00000101844	ATG4A	HAVANA	gene	18	protein_coding	3.25449	1.89768	1.35681	0.000562065	0.0138115	TRUE	FALSE
ENSG00000064787	BCAS1	HAVANA	gene	13	protein_coding	7.98944	8.87283	-0.883393	0.000568716	0.0139216	FALSE	FALSE
ENSG00000185825	BCAP31	HAVANA	gene	17	protein_coding	8.18656	7.5731	0.613465	0.000567723	0.0139216	FALSE	FALSE
ENSG00000143248	RGS5	HAVANA	gene	13	protein_coding	6.22254	7.06232	-0.839781	0.000580768	0.0141895	FALSE	FALSE
ENSG00000154642	C21orf91	HAVANA	gene	11	protein_coding	3.93316	4.98337	-1.05021	0.000583748	0.0142352	TRUE	FALSE
ENSG00000179083	FAM133A	HAVANA	gene	6	protein_coding	5.27299	4.45418	0.818817	0.000589874	0.0143573	FALSE	FALSE
ENSG00000186522	SEPTIN10	HAVANA	gene	15	protein_coding	3.88378	5.04797	-1.16419	0.000594749	0.0144004	TRUE	FALSE
ENSG00000132549	VPS13B	HAVANA	gene	18	protein_coding	3.30295	4.04665	-0.743699	0.000593752	0.0144004	FALSE	FALSE
ENSG00000167508	MVD	HAVANA	gene	12	protein_coding	6.89361	6.18615	0.70746	0.000596133	0.0144004	FALSE	FALSE
ENSG00000100285	NEFH	HAVANA	gene	10	protein_coding	8.72878	7.59465	1.13414	0.000595553	0.0144004	TRUE	FALSE
ENSG00000105270	CLIP3	HAVANA	gene	15	protein_coding	9.07186	8.3918	0.68006	0.000600482	0.0144782	FALSE	FALSE
ENSG00000097021	ACOT7	HAVANA	gene	19	protein_coding	8.96041	7.90419	1.05622	0.000603717	0.0145289	TRUE	FALSE
ENSG00000197208	SLC22A4	HAVANA	gene	6	protein_coding	1.3121	2.93371	-1.62161	0.000605701	0.0145493	TRUE	FALSE
ENSG00000168000	BSCL2	HAVANA	gene	14	protein_coding	9.50191	8.59842	0.903494	0.000607219	0.0145585	FALSE	FALSE
ENSG00000172638	EFEMP2	HAVANA	gene	13	protein_coding	4.17291	4.98344	-0.810523	0.000608415	0.01456	FALSE	FALSE
ENSG00000106089	STX1A	HAVANA	gene	12	protein_coding	4.93637	4.25851	0.677863	0.000611038	0.0145955	FALSE	FALSE
ENSG00000084636	COL16A1	HAVANA	gene	18	protein_coding	4.85173	5.65541	-0.803671	0.000612879	0.0146123	FALSE	FALSE
ENSG00000125459	MSTO1	HAVANA	gene	15	protein_coding	4.80298	3.94509	0.857891	0.00061443	0.0146221	FALSE	FALSE
ENSG00000198121	LPAR1	HAVANA	gene	13	protein_coding	6.2174	6.85797	-0.640576	0.000615671	0.0146245	FALSE	FALSE
ENSG00000109771	LRP2BP	HAVANA	gene	15	protein_coding	1.97403	3.45489	-1.48086	0.000619654	0.0146378	TRUE	FALSE
ENSG00000024862	CCDC28A	HAVANA	gene	17	protein_coding	6.45726	5.64386	0.813397	0.000617965	0.0146378	FALSE	FALSE
ENSG00000149591	TAGLN	HAVANA	gene	17	protein_coding	4.14202	5.29104	-1.14902	0.000618826	0.0146378	TRUE	FALSE
ENSG00000075340	ADD2	HAVANA	gene	23	protein_coding	7.18907	6.27687	0.912197	0.000625423	0.0147198	FALSE	FALSE
ENSG00000175352	NRIP3	HAVANA	gene	11	protein_coding	7.108	6.1222	0.985804	0.000624338	0.0147198	FALSE	FALSE
ENSG00000178947	SMIM10L2A	HAVANA	gene	9	protein_coding	7.19996	6.51708	0.682885	0.000626648	0.0147216	FALSE	FALSE
ENSG00000213186	TRIM59	HAVANA	gene	8	protein_coding	2.10525	3.36386	-1.25861	0.000629931	0.0147447	TRUE	FALSE
ENSG00000204386	NEU1	HAVANA	gene	11	protein_coding	5.22521	4.37193	0.853277	0.000629207	0.0147447	FALSE	FALSE
ENSG00000246705	H2AFJ	HAVANA	gene	4	protein_coding	4.40821	5.08063	-0.672414	0.00063388	0.0147832	FALSE	FALSE
ENSG00000151176	PLBD2	HAVANA	gene	8	protein_coding	7.26703	6.59494	0.672085	0.000633227	0.0147832	FALSE	FALSE
ENSG00000169813	HNRNPF	HAVANA	gene	16	protein_coding	5.35006	5.9172	-0.567138	0.000635991	0.0148056	FALSE	FALSE
ENSG00000177628	GBA	HAVANA	gene	16	protein_coding	7.04893	6.41127	0.637662	0.000640181	0.0148761	FALSE	FALSE
ENSG00000247092	SNHG10	HAVANA	gene	7	lncRNA	3.1397	4.17754	-1.03784	0.000643078	0.0149164	TRUE	FALSE
ENSG00000147535	PLPP5	HAVANA	gene	17	protein_coding	4.47251	3.71544	0.757072	0.000644695	0.0149269	FALSE	FALSE
ENSG00000145545	SRD5A1	HAVANA	gene	12	protein_coding	5.7387	4.62613	1.11257	0.000646795	0.0149485	TRUE	FALSE
ENSG00000204580	DDR1	HAVANA	gene	13	protein_coding	7.18801	7.7861	-0.598082	0.000648616	0.0149637	FALSE	FALSE
ENSG00000125744	RTN2	HAVANA	gene	12	protein_coding	5.90542	4.82592	1.07949	0.000651792	0.0150099	TRUE	FALSE
ENSG00000135002	RFK	HAVANA	gene	12	protein_coding	7.66146	6.49502	1.16644	0.000657036	0.0151036	TRUE	FALSE
ENSG00000175426	PCSK1	HAVANA	gene	11	protein_coding	6.61629	5.68001	0.936285	0.000662257	0.0151964	FALSE	FALSE
ENSG00000185009	AP3M1	HAVANA	gene	12	protein_coding	5.53118	4.67355	0.857629	0.000668077	0.0153025	FALSE	FALSE
ENSG00000166619	BLCAP	HAVANA	gene	15	protein_coding	8.66364	7.9697	0.693945	0.000669564	0.0153093	FALSE	FALSE
ENSG00000166265	CYYR1	HAVANA	gene	13	protein_coding	1.43815	2.92963	-1.49148	0.000671205	0.0153195	TRUE	FALSE
ENSG00000182240	BACE2	HAVANA	gene	16	protein_coding	2.74037	3.64657	-0.9062	0.000672509	0.015322	FALSE	FALSE
ENSG00000163510	CWC22	HAVANA	gene	14	protein_coding	2.96041	3.77104	-0.810623	0.000677895	0.0153628	FALSE	FALSE
ENSG00000067057	PFKP	HAVANA	gene	17	protein_coding	8.50238	7.67362	0.828754	0.000677711	0.0153628	FALSE	FALSE
ENSG00000131473	ACLY	HAVANA	gene	17	protein_coding	8.02157	7.06453	0.957038	0.000676831	0.0153628	FALSE	FALSE
ENSG00000167565	SERTAD3	HAVANA	gene	13	protein_coding	1.95244	3.13368	-1.18124	0.000682886	0.0154486	TRUE	FALSE
ENSG00000112893	MAN2A1	HAVANA	gene	9	protein_coding	4.22101	5.03808	-0.817071	0.000686691	0.0155074	FALSE	FALSE
ENSG00000169855	ROBO1	HAVANA	gene	20	protein_coding	5.76054	4.97681	0.783729	0.000690442	0.0155102	FALSE	FALSE
ENSG00000169129	AFAP1L2	HAVANA	gene	15	protein_coding	3.42062	4.20622	-0.785594	0.000688791	0.0155102	FALSE	FALSE
ENSG00000141458	NPC1	HAVANA	gene	13	protein_coding	5.3431	5.88538	-0.542283	0.000690215	0.0155102	FALSE	FALSE
ENSG00000235098	ANKRD65	HAVANA	gene	8	protein_coding	3.85985	4.58113	-0.721282	0.000694344	0.0155527	FALSE	FALSE
ENSG00000112144	ICK	HAVANA	gene	15	protein_coding	3.51395	4.34018	-0.826227	0.000694762	0.0155527	FALSE	FALSE
ENSG00000111110	PPM1H	HAVANA	gene	12	protein_coding	5.8058	4.82708	0.978718	0.000706148	0.0157801	FALSE	FALSE
ENSG00000172650	AGAP5	HAVANA	gene	13	protein_coding	1.53282	2.82769	-1.29487	0.000708734	0.0158103	TRUE	FALSE
ENSG00000130821	SLC6A8	HAVANA	gene	16	protein_coding	5.57662	6.36108	-0.784464	0.000715971	0.015944	FALSE	FALSE
ENSG00000131149	GSE1	HAVANA	gene	19	protein_coding	5.09013	4.37508	0.715052	0.000718332	0.0159689	FALSE	FALSE
ENSG00000105402	NAPA	HAVANA	gene	8	protein_coding	7.7779	7.2282	0.5497	0.000725384	0.0160977	FALSE	FALSE
ENSG00000007402	CACNA2D2	HAVANA	gene	11	protein_coding	6.56495	5.65211	0.912833	0.000727861	0.0161248	FALSE	FALSE
ENSG00000188580	NKAIN2	HAVANA	gene	15	protein_coding	4.84951	5.54585	-0.696347	0.000730611	0.01613	FALSE	FALSE
ENSG00000170889	RPS9	HAVANA	gene	14	protein_coding	8.55407	9.06061	-0.506546	0.000730312	0.01613	FALSE	FALSE
ENSG00000117410	ATP6V0B	HAVANA	gene	14	protein_coding	9.10618	8.41796	0.688226	0.000735809	0.0161891	FALSE	FALSE
ENSG00000104472	CHRAC1	HAVANA	gene	10	protein_coding	2.0621	3.51147	-1.44938	0.000734696	0.0161891	TRUE	FALSE
ENSG00000119242	CCDC92	HAVANA	gene	8	protein_coding	8.07107	7.51308	0.557994	0.00073782	0.0162026	FALSE	FALSE
ENSG00000126214	KLC1	HAVANA	gene	21	protein_coding	9.62324	8.88248	0.740767	0.000738949	0.0162026	FALSE	FALSE
ENSG00000103249	CLCN7	HAVANA	gene	18	protein_coding	6.92544	6.37095	0.554494	0.000748229	0.0163502	FALSE	FALSE
ENSG00000100372	SLC25A17	HAVANA	gene	15	protein_coding	5.21904	4.63088	0.58816	0.000747435	0.0163502	FALSE	FALSE
ENSG00000185090	MANEAL	HAVANA	gene	14	protein_coding	5.80763	4.81718	0.990446	0.000761892	0.0165776	FALSE	FALSE
ENSG00000005249	PRKAR2B	HAVANA	gene	13	protein_coding	6.34342	5.60963	0.73379	0.000762244	0.0165776	FALSE	FALSE
ENSG00000149090	PAMR1	HAVANA	gene	11	protein_coding	4.16433	4.83032	-0.665986	0.000762514	0.0165776	FALSE	FALSE
ENSG00000171450	CDK5R2	HAVANA	gene	6	protein_coding	6.95262	6.09757	0.855056	0.000764919	0.0166017	FALSE	FALSE
ENSG00000130055	GDPD2	HAVANA	gene	13	protein_coding	4.89941	4.10345	0.795962	0.000781102	0.0169243	FALSE	FALSE
ENSG00000084764	MAPRE3	HAVANA	gene	12	protein_coding	8.44641	7.77335	0.673055	0.000785307	0.0169867	FALSE	FALSE
ENSG00000008118	CAMK1G	HAVANA	gene	10	protein_coding	5.3067	4.52587	0.78083	0.000792285	0.0170774	FALSE	FALSE
ENSG00000055163	CYFIP2	HAVANA	gene	20	protein_coding	7.8834	7.25585	0.627554	0.000791459	0.0170774	FALSE	FALSE
ENSG00000132437	DDC	HAVANA	gene	18	protein_coding	6.95222	5.16872	1.7835	0.000793492	0.0170774	TRUE	FALSE
ENSG00000116120	FARSB	HAVANA	gene	11	protein_coding	6.49537	5.54706	0.948311	0.000795638	0.0170949	FALSE	FALSE
ENSG00000104714	ERICH1	HAVANA	gene	14	protein_coding	4.60878	3.86538	0.7434	0.000800772	0.0171764	FALSE	FALSE
ENSG00000116127	ALMS1	HAVANA	gene	18	protein_coding	2.09705	3.47372	-1.37667	0.000807373	0.0172603	TRUE	FALSE
ENSG00000132199	ENOSF1	HAVANA	gene	20	protein_coding	2.58532	4.27511	-1.68979	0.000806377	0.0172603	TRUE	FALSE
ENSG00000184007	PTP4A2	HAVANA	gene	21	protein_coding	7.5802	8.09827	-0.518065	0.000816996	0.0173503	FALSE	FALSE
ENSG00000078140	UBE2K	HAVANA	gene	14	protein_coding	6.97776	6.43523	0.542531	0.000812987	0.0173503	FALSE	FALSE
ENSG00000136960	ENPP2	HAVANA	gene	12	protein_coding	6.538	7.3671	-0.8291	0.000816949	0.0173503	FALSE	FALSE
ENSG00000125779	PANK2	HAVANA	gene	22	protein_coding	5.91003	5.10307	0.806951	0.000815134	0.0173503	FALSE	FALSE
ENSG00000011426	ANLN	HAVANA	gene	11	protein_coding	6.0651	6.80977	-0.744676	0.000823772	0.0174653	FALSE	FALSE
ENSG00000172889	EGFL7	HAVANA	gene	16	protein_coding	7.26068	6.61724	0.643431	0.000826751	0.0174996	FALSE	FALSE
ENSG00000144597	EAF1	HAVANA	gene	14	protein_coding	5.47313	4.79492	0.678205	0.000834272	0.0176297	FALSE	FALSE
ENSG00000005243	COPZ2	HAVANA	gene	10	protein_coding	1.93836	3.67318	-1.73482	0.000839002	0.0177005	TRUE	FALSE
ENSG00000122484	RPAP2	HAVANA	gene	9	protein_coding	4.67223	3.94798	0.724247	0.000847687	0.017825	FALSE	FALSE
ENSG00000134333	LDHA	HAVANA	gene	14	protein_coding	9.13331	8.2262	0.907112	0.00084646	0.017825	FALSE	FALSE
ENSG00000018189	RUFY3	HAVANA	gene	13	protein_coding	8.36586	7.82516	0.540698	0.00084909	0.0178253	FALSE	FALSE
ENSG00000113312	TTC1	HAVANA	gene	11	protein_coding	7.24434	6.60786	0.636481	0.000852434	0.0178478	FALSE	FALSE
ENSG00000082641	NFE2L1	HAVANA	gene	16	protein_coding	8.01407	7.43755	0.576525	0.000852944	0.0178478	FALSE	FALSE
ENSG00000087253	LPCAT2	HAVANA	gene	13	protein_coding	5.60152	4.79963	0.801885	0.000864767	0.0180657	FALSE	FALSE
ENSG00000144283	PKP4	HAVANA	gene	21	protein_coding	7.08301	7.74627	-0.663263	0.000867384	0.0180909	FALSE	FALSE
ENSG00000196517	SLC6A9	HAVANA	gene	11	protein_coding	5.33567	6.04085	-0.705174	0.000878124	0.0182705	FALSE	FALSE
ENSG00000103264	FBXO31	HAVANA	gene	18	protein_coding	6.11364	5.30646	0.807176	0.00087884	0.0182705	FALSE	FALSE
ENSG00000112208	BAG2	HAVANA	gene	11	protein_coding	4.5884	3.28252	1.30588	0.000881934	0.0183051	TRUE	FALSE
ENSG00000158560	DYNC1I1	HAVANA	gene	14	protein_coding	8.2925	7.34196	0.950536	0.000884879	0.0183102	FALSE	FALSE
ENSG00000198513	ATL1	HAVANA	gene	11	protein_coding	7.68052	6.80368	0.876842	0.000885031	0.0183102	FALSE	FALSE
ENSG00000138018	SELENOI	HAVANA	gene	18	protein_coding	6.1235	5.4159	0.707598	0.00089168	0.0183941	FALSE	FALSE
ENSG00000168477	TNXB	HAVANA	gene	19	protein_coding	3.69365	4.60059	-0.906941	0.000892324	0.0183941	FALSE	FALSE
ENSG00000186469	GNG2	HAVANA	gene	8	protein_coding	8.01503	7.09649	0.918542	0.00089339	0.0183941	FALSE	FALSE
ENSG00000172667	ZMAT3	HAVANA	gene	11	protein_coding	7.04532	6.46147	0.583852	0.000895875	0.0184157	FALSE	FALSE
ENSG00000139726	DENR	HAVANA	gene	11	protein_coding	6.5929	6.03153	0.561371	0.000899931	0.0184695	FALSE	FALSE
ENSG00000115935	WIPF1	HAVANA	gene	17	protein_coding	5.05766	5.93422	-0.876565	0.000902709	0.0184969	FALSE	FALSE
ENSG00000189058	APOD	HAVANA	gene	9	protein_coding	8.36554	9.14876	-0.783221	0.0009053	0.0185204	FALSE	FALSE
ENSG00000116667	C1orf21	HAVANA	gene	14	protein_coding	6.21137	5.57295	0.638415	0.000909641	0.01855	FALSE	FALSE
ENSG00000115902	SLC1A4	HAVANA	gene	11	protein_coding	7.75366	7.1574	0.59626	0.000909409	0.01855	FALSE	FALSE
ENSG00000171714	ANO5	HAVANA	gene	11	protein_coding	4.97978	4.30246	0.677321	0.000919787	0.0187271	FALSE	FALSE
ENSG00000172086	KRCC1	HAVANA	gene	9	protein_coding	3.81582	4.55632	-0.740498	0.000925145	0.0188064	FALSE	FALSE
ENSG00000153815	CMIP	HAVANA	gene	16	protein_coding	7.675	6.97233	0.702663	0.00092851	0.0188449	FALSE	FALSE
ENSG00000138095	LRPPRC	HAVANA	gene	19	protein_coding	7.39476	6.59053	0.804228	0.000932198	0.0188601	FALSE	FALSE
ENSG00000134779	TPGS2	HAVANA	gene	15	protein_coding	7.92188	7.21777	0.704106	0.000931105	0.0188601	FALSE	FALSE
ENSG00000146859	TMEM140	HAVANA	gene	6	protein_coding	1.90721	3.10783	-1.20062	0.000940645	0.019001	TRUE	FALSE
ENSG00000273018	FAM106A	HAVANA	gene	6	lncRNA	3.04068	3.87014	-0.829465	0.000950459	0.0191691	FALSE	FALSE
ENSG00000149527	PLCH2	HAVANA	gene	18	protein_coding	3.60465	4.32991	-0.725251	0.000956719	0.0191747	FALSE	FALSE
ENSG00000132017	DCAF15	HAVANA	gene	10	protein_coding	4.25042	3.54439	0.706027	0.000953666	0.0191747	FALSE	FALSE
ENSG00000188039	NWD1	HAVANA	gene	14	protein_coding	2.60672	3.9979	-1.39118	0.000956031	0.0191747	TRUE	FALSE
ENSG00000128309	MPST	HAVANA	gene	16	protein_coding	4.36184	5.01901	-0.657173	0.000956271	0.0191747	FALSE	FALSE
ENSG00000231999	LRRC8C-DT	HAVANA	gene	7	lncRNA	1.58692	2.94859	-1.36168	0.000975352	0.0191828	TRUE	FALSE
ENSG00000155380	SLC16A1	HAVANA	gene	11	protein_coding	4.1478	5.13403	-0.986222	0.000963522	0.0191828	FALSE	FALSE
ENSG00000182901	RGS7	HAVANA	gene	16	protein_coding	5.78438	4.66974	1.11463	0.000978059	0.0191828	TRUE	FALSE
ENSG00000136732	GYPC	HAVANA	gene	16	protein_coding	2.07727	3.78762	-1.71035	0.000972581	0.0191828	TRUE	FALSE
ENSG00000135900	MRPL44	HAVANA	gene	4	protein_coding	5.79726	5.0652	0.732066	0.000967261	0.0191828	FALSE	FALSE
ENSG00000178722	C5orf64	HAVANA	gene	13	lncRNA	1.64376	3.25235	-1.60859	0.000971458	0.0191828	TRUE	FALSE
ENSG00000164403	SHROOM1	HAVANA	gene	14	protein_coding	4.12043	4.99873	-0.878297	0.000977753	0.0191828	FALSE	FALSE
ENSG00000164620	RELL2	HAVANA	gene	9	protein_coding	6.01745	5.18322	0.834236	0.000971749	0.0191828	FALSE	FALSE
ENSG00000137074	APTX	HAVANA	gene	19	protein_coding	5.2286	4.39922	0.829377	0.000972747	0.0191828	FALSE	FALSE
ENSG00000261340	LINC01616	HAVANA	gene	1	lncRNA	3.69367	2.46363	1.23004	0.000971897	0.0191828	TRUE	FALSE
ENSG00000111077	TNS2	HAVANA	gene	17	protein_coding	4.61981	5.26336	-0.643545	0.000969326	0.0191828	FALSE	FALSE
ENSG00000103042	SLC38A7	HAVANA	gene	9	protein_coding	4.90063	3.90687	0.99376	0.000973594	0.0191828	FALSE	FALSE
ENSG00000160111	CPAMD8	HAVANA	gene	13	protein_coding	4.68509	3.88117	0.803914	0.000966997	0.0191828	FALSE	FALSE
ENSG00000243978	RTL9	HAVANA	gene	8	protein_coding	3.66268	2.41119	1.25149	0.000964869	0.0191828	TRUE	FALSE
ENSG00000248019	FAM13A-AS1	HAVANA	gene	3	lncRNA	1.32407	2.83169	-1.50762	0.000980752	0.019183	TRUE	FALSE
ENSG00000011332	DPF1	HAVANA	gene	19	protein_coding	4.87535	4.19496	0.68039	0.000981058	0.019183	FALSE	FALSE
ENSG00000157734	SNX22	HAVANA	gene	14	protein_coding	4.16243	5.10793	-0.945493	0.000984308	0.019188	FALSE	FALSE
ENSG00000183570	PCBP3	HAVANA	gene	16	protein_coding	4.71294	3.98391	0.729032	0.000984171	0.019188	FALSE	FALSE
ENSG00000107105	ELAVL2	HAVANA	gene	15	protein_coding	7.4266	6.6891	0.737499	0.000986714	0.0192057	FALSE	FALSE
ENSG00000144320	LNPK	HAVANA	gene	14	protein_coding	6.13469	5.40897	0.725717	0.000991899	0.0192355	FALSE	FALSE
ENSG00000161281	COX7A1	HAVANA	gene	11	protein_coding	5.63777	6.29635	-0.658579	0.000992741	0.0192355	FALSE	FALSE
ENSG00000101158	NELFCD	HAVANA	gene	15	protein_coding	5.58541	4.89176	0.693657	0.000990814	0.0192355	FALSE	FALSE
ENSG00000158156	XKR8	HAVANA	gene	7	protein_coding	1.63202	3.1666	-1.53458	0.000995969	0.0192676	TRUE	FALSE
ENSG00000067191	CACNB1	HAVANA	gene	16	protein_coding	6.45879	5.7077	0.751091	0.000997736	0.0192676	FALSE	FALSE
ENSG00000165186	PTCHD1	HAVANA	gene	12	protein_coding	4.89758	4.13562	0.761961	0.000998904	0.0192676	FALSE	FALSE
ENSG00000155974	GRIP1	HAVANA	gene	12	protein_coding	3.52804	2.19684	1.3312	0.00100247	0.0192783	TRUE	FALSE
ENSG00000105643	ARRDC2	HAVANA	gene	10	protein_coding	4.18309	5.14955	-0.966467	0.00100212	0.0192783	FALSE	FALSE
ENSG00000174607	UGT8	HAVANA	gene	11	protein_coding	5.51684	6.71264	-1.1958	0.00100411	0.019281	TRUE	FALSE
ENSG00000075043	KCNQ2	HAVANA	gene	18	protein_coding	5.19473	6.18994	-0.995207	0.00100597	0.0192879	FALSE	FALSE
ENSG00000171840	NINJ2	HAVANA	gene	12	protein_coding	3.34299	4.28401	-0.941012	0.00101163	0.0193675	FALSE	FALSE
ENSG00000116205	TCEANC2	HAVANA	gene	14	protein_coding	2.09975	3.2401	-1.14035	0.00101526	0.0193791	TRUE	FALSE
ENSG00000205927	OLIG2	HAVANA	gene	5	protein_coding	4.98744	5.90593	-0.918489	0.00101397	0.0193791	FALSE	FALSE
ENSG00000140323	DISP2	HAVANA	gene	6	protein_coding	5.88196	5.22958	0.652381	0.00102382	0.0194844	FALSE	FALSE
ENSG00000162073	PAQR4	HAVANA	gene	14	protein_coding	4.71791	5.99592	-1.27801	0.00102255	0.0194844	TRUE	FALSE
ENSG00000132026	RTBDN	HAVANA	gene	13	protein_coding	4.5874	3.30665	1.28075	0.00103051	0.0195827	TRUE	FALSE
ENSG00000077380	DYNC1I2	HAVANA	gene	15	protein_coding	7.15015	7.62133	-0.471181	0.0010341	0.0195928	FALSE	FALSE
ENSG00000114541	FRMD4B	HAVANA	gene	15	protein_coding	3.20373	4.76363	-1.55989	0.00103259	0.0195928	TRUE	FALSE
ENSG00000172031	EPHX4	HAVANA	gene	7	protein_coding	3.53906	2.55138	0.987688	0.00104008	0.019663	FALSE	FALSE
ENSG00000148123	PLPPR1	HAVANA	gene	15	protein_coding	3.79706	4.72637	-0.929303	0.00104086	0.019663	FALSE	FALSE
ENSG00000110427	KIAA1549L	HAVANA	gene	16	protein_coding	5.75337	5.10096	0.652414	0.00104678	0.0196932	FALSE	FALSE
ENSG00000100462	PRMT5	HAVANA	gene	16	protein_coding	5.77521	5.007	0.768215	0.00104668	0.0196932	FALSE	FALSE
ENSG00000087086	FTL	HAVANA	gene	15	protein_coding	10.5321	10.9985	-0.466366	0.00104707	0.0196932	FALSE	FALSE
ENSG00000136928	GABBR2	HAVANA	gene	7	protein_coding	6.44584	5.76219	0.683649	0.00105127	0.0197433	FALSE	FALSE
ENSG00000196247	ZNF107	HAVANA	gene	11	protein_coding	2.18633	2.84286	-0.656528	0.00105653	0.0197552	FALSE	FALSE
ENSG00000175664	TEX26	HAVANA	gene	10	protein_coding	3.33788	1.76417	1.5737	0.00105501	0.0197552	TRUE	FALSE
ENSG00000103769	RAB11A	HAVANA	gene	10	protein_coding	8.20952	7.5141	0.695419	0.00105355	0.0197552	FALSE	FALSE
ENSG00000154917	RAB6B	HAVANA	gene	11	protein_coding	9.09715	8.33815	0.758999	0.00106302	0.0198309	FALSE	FALSE
ENSG00000131730	CKMT2	HAVANA	gene	16	protein_coding	1.81927	3.71042	-1.89115	0.00106366	0.0198309	TRUE	FALSE
ENSG00000185760	KCNQ5	HAVANA	gene	15	protein_coding	4.52197	3.37546	1.1465	0.00106557	0.0198375	TRUE	FALSE
ENSG00000050628	PTGER3	HAVANA	gene	20	protein_coding	3.04235	3.87631	-0.833965	0.00107156	0.0199202	FALSE	FALSE
ENSG00000186193	SAPCD2	HAVANA	gene	9	protein_coding	2.21708	3.74983	-1.53275	0.00107551	0.0199646	TRUE	FALSE
ENSG00000108239	TBC1D12	HAVANA	gene	9	protein_coding	4.71445	5.56597	-0.851517	0.00108302	0.0200749	FALSE	FALSE
ENSG00000085662	AKR1B1	HAVANA	gene	14	protein_coding	8.18416	7.48413	0.700029	0.0010866	0.020094	FALSE	FALSE
ENSG00000186318	BACE1	HAVANA	gene	16	protein_coding	6.61054	7.12868	-0.518143	0.00108718	0.020094	FALSE	FALSE
ENSG00000114383	TUSC2	HAVANA	gene	10	protein_coding	7.0593	6.46014	0.599157	0.00109432	0.0201003	FALSE	FALSE
ENSG00000154277	UCHL1	HAVANA	gene	13	protein_coding	11.696	10.5371	1.15889	0.00109692	0.0201003	TRUE	FALSE
ENSG00000111726	CMAS	HAVANA	gene	13	protein_coding	7.74246	6.87096	0.871493	0.00109294	0.0201003	FALSE	FALSE
ENSG00000065559	MAP2K4	HAVANA	gene	15	protein_coding	7.26857	6.54501	0.723561	0.00109321	0.0201003	FALSE	FALSE
ENSG00000078814	MYH7B	HAVANA	gene	15	protein_coding	2.42928	3.67926	-1.24998	0.00109576	0.0201003	TRUE	FALSE
ENSG00000161179	YDJC	HAVANA	gene	13	protein_coding	4.77637	3.89251	0.883862	0.00109344	0.0201003	FALSE	FALSE
ENSG00000197102	DYNC1H1	HAVANA	gene	12	protein_coding	8.79932	8.30386	0.495469	0.00110044	0.0201073	FALSE	FALSE
ENSG00000140848	CPNE2	HAVANA	gene	17	protein_coding	4.64744	5.35134	-0.703904	0.0010996	0.0201073	FALSE	FALSE
ENSG00000188976	NOC2L	HAVANA	gene	11	protein_coding	5.97936	5.42361	0.555745	0.00110624	0.0201274	FALSE	FALSE
ENSG00000264522	OTUD7B	HAVANA	gene	6	protein_coding	4.91578	5.60191	-0.686135	0.00110575	0.0201274	FALSE	FALSE
ENSG00000163485	ADORA1	HAVANA	gene	17	protein_coding	5.53836	6.27109	-0.732723	0.00110418	0.0201274	FALSE	FALSE
ENSG00000067606	PRKCZ	HAVANA	gene	17	protein_coding	7.96293	7.35658	0.606348	0.00111323	0.0201402	FALSE	FALSE
ENSG00000185955	C7orf61	HAVANA	gene	5	protein_coding	1.58199	2.86002	-1.27803	0.00111227	0.0201402	TRUE	FALSE
ENSG00000073910	FRY	HAVANA	gene	22	protein_coding	6.59586	5.91092	0.684936	0.00111008	0.0201402	FALSE	FALSE
ENSG00000126733	DACH2	HAVANA	gene	21	protein_coding	4.58571	3.67702	0.908693	0.00111023	0.0201402	FALSE	FALSE
ENSG00000143502	SUSD4	HAVANA	gene	15	protein_coding	5.93365	5.06817	0.865486	0.0011194	0.0201948	FALSE	FALSE
ENSG00000077942	FBLN1	HAVANA	gene	19	protein_coding	4.06064	4.86305	-0.802412	0.00111891	0.0201948	FALSE	FALSE
ENSG00000160678	S100A1	HAVANA	gene	11	protein_coding	7.53456	8.34578	-0.811219	0.00113731	0.0204605	FALSE	FALSE
ENSG00000187867	PALM3	HAVANA	gene	10	protein_coding	3.39789	2.40254	0.995352	0.00113639	0.0204605	FALSE	FALSE
ENSG00000198853	RUSC2	HAVANA	gene	12	protein_coding	6.73503	6.167	0.568025	0.0011424	0.0205232	FALSE	FALSE
ENSG00000124374	PAIP2B	HAVANA	gene	9	protein_coding	5.88574	6.58603	-0.70029	0.00115127	0.0205709	FALSE	FALSE
ENSG00000197756	RPL37A	HAVANA	gene	10	protein_coding	10.4864	11.0705	-0.584076	0.00115308	0.0205709	FALSE	FALSE
ENSG00000118402	ELOVL4	HAVANA	gene	6	protein_coding	6.31722	5.32032	0.996897	0.00114884	0.0205709	FALSE	FALSE
ENSG00000146592	CREB5	HAVANA	gene	17	protein_coding	4.04031	4.96862	-0.92831	0.00114885	0.0205709	FALSE	FALSE
ENSG00000177105	RHOG	HAVANA	gene	10	protein_coding	5.29718	5.96611	-0.668932	0.00115218	0.0205709	FALSE	FALSE
ENSG00000135097	MSI1	HAVANA	gene	7	protein_coding	3.19014	3.82526	-0.635124	0.00115553	0.020586	FALSE	FALSE
ENSG00000165548	TMEM63C	HAVANA	gene	11	protein_coding	5.98613	5.25712	0.729013	0.00115967	0.0206025	FALSE	FALSE
ENSG00000188215	DCUN1D3	HAVANA	gene	10	protein_coding	3.58559	2.64698	0.938616	0.00115898	0.0206025	FALSE	FALSE
ENSG00000155324	GRAMD2B	HAVANA	gene	10	protein_coding	4.74349	5.40608	-0.662591	0.00116625	0.0206809	FALSE	FALSE
ENSG00000137154	RPS6	HAVANA	gene	13	protein_coding	9.15412	9.70076	-0.546639	0.00116738	0.0206809	FALSE	FALSE
ENSG00000234899	SOX9-AS1	HAVANA	gene	10	lncRNA	3.10503	4.11705	-1.01202	0.00116891	0.0206809	TRUE	FALSE
ENSG00000108854	SMURF2	HAVANA	gene	16	protein_coding	3.83001	4.43099	-0.600977	0.00117055	0.0206813	FALSE	FALSE
ENSG00000078668	VDAC3	HAVANA	gene	14	protein_coding	8.29814	7.45484	0.843299	0.00118784	0.0209485	FALSE	FALSE
ENSG00000155304	HSPA13	HAVANA	gene	6	protein_coding	7.50941	6.93572	0.573688	0.00118894	0.0209485	FALSE	FALSE
ENSG00000182103	FAM181B	HAVANA	gene	5	protein_coding	5.60017	6.1912	-0.591025	0.00119297	0.0209908	FALSE	FALSE
ENSG00000175130	MARCKSL1	HAVANA	gene	7	protein_coding	8.11474	8.78007	-0.665331	0.00119739	0.0210257	FALSE	FALSE
ENSG00000184144	CNTN2	HAVANA	gene	12	protein_coding	7.27464	8.00159	-0.726949	0.00119988	0.0210257	FALSE	FALSE
ENSG00000137831	UACA	HAVANA	gene	15	protein_coding	2.98477	4.19752	-1.21274	0.00119952	0.0210257	TRUE	FALSE
ENSG00000169213	RAB3B	HAVANA	gene	7	protein_coding	7.91523	7.0298	0.885431	0.00120904	0.0211454	FALSE	FALSE
ENSG00000165868	HSPA12A	HAVANA	gene	14	protein_coding	7.4074	6.51013	0.897261	0.00121149	0.0211454	FALSE	FALSE
ENSG00000105472	CLEC11A	HAVANA	gene	13	protein_coding	4.38751	4.94349	-0.555978	0.00121165	0.0211454	FALSE	FALSE
ENSG00000160752	FDPS	HAVANA	gene	14	protein_coding	7.8355	7.00495	0.830552	0.00121698	0.0212095	FALSE	FALSE
ENSG00000147642	SYBU	HAVANA	gene	17	protein_coding	7.13213	6.43917	0.692968	0.00122639	0.0213157	FALSE	FALSE
ENSG00000101856	PGRMC1	HAVANA	gene	10	protein_coding	9.28678	8.51516	0.771618	0.00122556	0.0213157	FALSE	FALSE
ENSG00000106683	LIMK1	HAVANA	gene	15	protein_coding	7.38449	6.79079	0.593699	0.00122933	0.0213378	FALSE	FALSE
ENSG00000171316	CHD7	HAVANA	gene	12	protein_coding	3.87474	4.74187	-0.867127	0.00123888	0.0214455	FALSE	FALSE
ENSG00000139645	ANKRD52	HAVANA	gene	10	protein_coding	6.26576	5.45235	0.813409	0.00123816	0.0214455	FALSE	FALSE
ENSG00000214338	SOGA3	HAVANA	gene	10	protein_coding	3.39019	2.34116	1.04903	0.00124082	0.0214501	TRUE	FALSE
ENSG00000101400	SNTA1	HAVANA	gene	5	protein_coding	7.1516	7.7179	-0.566307	0.0012426	0.021452	FALSE	FALSE
ENSG00000117602	RCAN3	HAVANA	gene	12	protein_coding	5.43474	4.66854	0.766196	0.00124916	0.0215074	FALSE	FALSE
ENSG00000118263	KLF7	HAVANA	gene	15	protein_coding	5.70245	5.08122	0.621226	0.00124865	0.0215074	FALSE	FALSE
ENSG00000110906	KCTD10	HAVANA	gene	13	protein_coding	6.24542	5.50583	0.739587	0.00125277	0.0215193	FALSE	FALSE
ENSG00000235903	CPB2-AS1	HAVANA	gene	9	lncRNA	2.78275	4.29139	-1.50864	0.00125321	0.0215193	TRUE	FALSE
ENSG00000108061	SHOC2	HAVANA	gene	11	protein_coding	6.94949	6.31453	0.634955	0.00125851	0.0215526	FALSE	FALSE
ENSG00000283633	AP000547.3	HAVANA	gene	1	lncRNA	1.44123	2.7389	-1.29767	0.00125851	0.0215526	TRUE	FALSE
ENSG00000143367	TUFT1	HAVANA	gene	16	protein_coding	4.36355	3.51413	0.849412	0.00127058	0.0216437	FALSE	FALSE
ENSG00000185627	PSMD13	HAVANA	gene	18	protein_coding	6.77878	6.15949	0.619287	0.00127035	0.0216437	FALSE	FALSE
ENSG00000257303	AC073896.2	HAVANA	gene	2	lncRNA	2.41293	3.34587	-0.932937	0.00126867	0.0216437	FALSE	FALSE
ENSG00000165379	LRFN5	HAVANA	gene	13	protein_coding	5.4329	4.39917	1.03373	0.00126875	0.0216437	TRUE	FALSE
ENSG00000133226	SRRM1	HAVANA	gene	17	protein_coding	5.08602	5.68549	-0.599472	0.00127404	0.0216502	FALSE	FALSE
ENSG00000156966	B3GNT7	HAVANA	gene	7	protein_coding	1.67611	3.12065	-1.44455	0.00127602	0.0216502	TRUE	FALSE
ENSG00000102755	FLT1	HAVANA	gene	12	protein_coding	4.58771	5.20966	-0.621948	0.00127503	0.0216502	FALSE	FALSE
ENSG00000168297	PXK	HAVANA	gene	16	protein_coding	5.66417	6.42677	-0.762602	0.00127987	0.0216869	FALSE	FALSE
ENSG00000110921	MVK	HAVANA	gene	14	protein_coding	5.92209	5.17322	0.748873	0.00128928	0.0218174	FALSE	FALSE
ENSG00000100401	RANGAP1	HAVANA	gene	19	protein_coding	7.86538	7.35559	0.509788	0.00129146	0.0218255	FALSE	FALSE
ENSG00000186889	TMEM17	HAVANA	gene	10	protein_coding	5.0677	4.21925	0.848451	0.00129374	0.0218312	FALSE	FALSE
ENSG00000163686	ABHD6	HAVANA	gene	15	protein_coding	4.21165	5.14801	-0.936358	0.0012952	0.0218312	FALSE	FALSE
ENSG00000165476	REEP3	HAVANA	gene	14	protein_coding	5.31117	5.92808	-0.616909	0.00131033	0.0220572	FALSE	FALSE
ENSG00000175066	GK5	HAVANA	gene	16	protein_coding	3.66323	4.52593	-0.862703	0.00131958	0.0221838	FALSE	FALSE
ENSG00000071282	LMCD1	HAVANA	gene	12	protein_coding	3.15137	3.87442	-0.723055	0.00132534	0.0222294	FALSE	FALSE
ENSG00000125820	NKX2-2	HAVANA	gene	6	protein_coding	2.45499	3.97416	-1.51917	0.00132576	0.0222294	TRUE	FALSE
ENSG00000187775	DNAH17	HAVANA	gene	16	protein_coding	2.82781	4.31199	-1.48418	0.00133171	0.0223	TRUE	FALSE
ENSG00000106615	RHEB	HAVANA	gene	10	protein_coding	8.22007	7.54254	0.677531	0.00134087	0.0224242	FALSE	FALSE
ENSG00000111912	NCOA7	HAVANA	gene	20	protein_coding	7.69817	6.96373	0.734437	0.00134533	0.0224403	FALSE	FALSE
ENSG00000242802	AP5Z1	HAVANA	gene	9	protein_coding	4.86711	4.21874	0.648364	0.00134419	0.0224403	FALSE	FALSE
ENSG00000197747	S100A10	HAVANA	gene	9	protein_coding	7.32587	6.68374	0.642135	0.00135264	0.0224454	FALSE	FALSE
ENSG00000164303	ENPP6	HAVANA	gene	11	protein_coding	2.8421	4.1345	-1.2924	0.00134902	0.0224454	TRUE	FALSE
ENSG00000136888	ATP6V1G1	HAVANA	gene	7	protein_coding	8.01772	7.24542	0.772293	0.00135253	0.0224454	FALSE	FALSE
ENSG00000136425	CIB2	HAVANA	gene	14	protein_coding	4.93587	4.10124	0.834624	0.00135118	0.0224454	FALSE	FALSE
ENSG00000114480	GBE1	HAVANA	gene	13	protein_coding	5.35356	4.53435	0.819212	0.00136371	0.0225308	FALSE	FALSE
ENSG00000113552	GNPDA1	HAVANA	gene	16	protein_coding	5.93159	5.10219	0.829404	0.00136481	0.0225308	FALSE	FALSE
ENSG00000204052	LRRC73	HAVANA	gene	4	protein_coding	4.88572	4.06725	0.818473	0.00136131	0.0225308	FALSE	FALSE
ENSG00000140941	MAP1LC3B	HAVANA	gene	14	protein_coding	8.7191	8.04534	0.673762	0.00136129	0.0225308	FALSE	FALSE
ENSG00000203780	FANK1	HAVANA	gene	10	protein_coding	1.44451	2.88344	-1.43893	0.00136659	0.0225312	TRUE	FALSE
ENSG00000119227	PIGZ	HAVANA	gene	8	protein_coding	5.30278	4.42258	0.880199	0.00137626	0.0225588	FALSE	FALSE
ENSG00000113369	ARRDC3	HAVANA	gene	9	protein_coding	4.69042	5.2162	-0.525786	0.00137121	0.0225588	FALSE	FALSE
ENSG00000171720	HDAC3	HAVANA	gene	10	protein_coding	5.45856	4.85409	0.604471	0.00137882	0.0225588	FALSE	FALSE
ENSG00000069696	DRD4	HAVANA	gene	7	protein_coding	1.44958	2.73678	-1.2872	0.00137731	0.0225588	TRUE	FALSE
ENSG00000166250	CLMP	HAVANA	gene	12	protein_coding	3.66353	2.58216	1.08137	0.00137674	0.0225588	TRUE	FALSE
ENSG00000166377	ATP9B	HAVANA	gene	20	protein_coding	3.54497	4.31722	-0.772251	0.00137653	0.0225588	FALSE	FALSE
ENSG00000147488	ST18	HAVANA	gene	11	protein_coding	4.26247	5.32426	-1.06179	0.00138835	0.0226104	TRUE	FALSE
ENSG00000154127	UBASH3B	HAVANA	gene	10	protein_coding	5.26242	4.24328	1.01914	0.00138656	0.0226104	TRUE	FALSE
ENSG00000123178	SPRYD7	HAVANA	gene	15	protein_coding	6.45204	5.86547	0.586566	0.00138902	0.0226104	FALSE	FALSE
ENSG00000103056	SMPD3	HAVANA	gene	12	protein_coding	4.15233	3.13358	1.01874	0.00138849	0.0226104	TRUE	FALSE
ENSG00000146215	CRIP3	HAVANA	gene	13	protein_coding	1.43937	2.75903	-1.31966	0.00139709	0.0227129	TRUE	FALSE
ENSG00000213281	NRAS	HAVANA	gene	5	protein_coding	5.92669	5.15826	0.768425	0.00139905	0.022716	FALSE	FALSE
ENSG00000131459	GFPT2	HAVANA	gene	13	protein_coding	1.36449	2.92353	-1.55904	0.00141418	0.0229325	TRUE	FALSE
ENSG00000049089	COL9A2	HAVANA	gene	15	protein_coding	5.18905	5.81267	-0.623621	0.00142389	0.0230599	FALSE	FALSE
ENSG00000157423	HYDIN	HAVANA	gene	18	protein_coding	1.76344	3.03871	-1.27527	0.00142563	0.0230599	TRUE	FALSE
ENSG00000100526	CDKN3	HAVANA	gene	20	protein_coding	3.49032	2.23683	1.25349	0.00143603	0.0231727	TRUE	FALSE
ENSG00000065923	SLC9A7	HAVANA	gene	10	protein_coding	6.91791	6.27493	0.642971	0.00143621	0.0231727	FALSE	FALSE
ENSG00000197892	KIF13B	HAVANA	gene	13	protein_coding	4.42806	5.13324	-0.705175	0.00144267	0.0232476	FALSE	FALSE
ENSG00000162444	RBP7	HAVANA	gene	12	protein_coding	2.60826	4.02428	-1.41602	0.0014468	0.0232611	TRUE	FALSE
ENSG00000169231	THBS3	HAVANA	gene	13	protein_coding	3.31658	2.16619	1.15039	0.00144713	0.0232611	TRUE	FALSE
ENSG00000165966	PDZRN4	HAVANA	gene	16	protein_coding	3.56916	2.70847	0.860695	0.00145477	0.0232965	FALSE	FALSE
ENSG00000108370	RGS9	HAVANA	gene	17	protein_coding	4.68759	3.9143	0.773286	0.00145377	0.0232965	FALSE	FALSE
ENSG00000150656	CNDP1	HAVANA	gene	15	protein_coding	6.64541	7.37868	-0.733277	0.00145478	0.0232965	FALSE	FALSE
ENSG00000135636	DYSF	HAVANA	gene	14	protein_coding	5.21742	4.51608	0.701341	0.00145891	0.0233334	FALSE	FALSE
ENSG00000197063	MAFG	HAVANA	gene	11	protein_coding	6.54411	5.82023	0.723876	0.00146199	0.0233536	FALSE	FALSE
ENSG00000011021	CLCN6	HAVANA	gene	23	protein_coding	7.2449	6.52747	0.717434	0.00146509	0.023374	FALSE	FALSE
ENSG00000115828	QPCT	HAVANA	gene	17	protein_coding	6.34877	5.10916	1.23961	0.00147132	0.0234442	TRUE	FALSE
ENSG00000007264	MATK	HAVANA	gene	15	protein_coding	4.04947	5.10202	-1.05255	0.00148314	0.0236033	TRUE	FALSE
ENSG00000057757	PITHD1	HAVANA	gene	10	protein_coding	8.53232	7.71096	0.82136	0.00148766	0.0236432	FALSE	FALSE
ENSG00000112186	CAP2	HAVANA	gene	12	protein_coding	6.30114	5.49003	0.811116	0.00148933	0.0236432	FALSE	FALSE
ENSG00000185274	GALNT17	HAVANA	gene	12	protein_coding	5.68594	4.96037	0.72557	0.00149424	0.0236918	FALSE	FALSE
ENSG00000123240	OPTN	HAVANA	gene	17	protein_coding	8.11868	7.51666	0.602022	0.00150432	0.023797	FALSE	FALSE
ENSG00000130311	DDA1	HAVANA	gene	11	protein_coding	7.01534	6.39398	0.621364	0.00150459	0.023797	FALSE	FALSE
ENSG00000265763	ZNF488	HAVANA	gene	4	protein_coding	3.76192	4.77442	-1.0125	0.00150892	0.0238361	TRUE	FALSE
ENSG00000175567	UCP2	HAVANA	gene	10	protein_coding	3.61143	2.37643	1.23501	0.00151104	0.0238403	TRUE	FALSE
ENSG00000104897	SF3A2	HAVANA	gene	10	protein_coding	3.60164	4.375	-0.773369	0.00151652	0.0238974	FALSE	FALSE
ENSG00000052802	MSMO1	HAVANA	gene	13	protein_coding	7.83752	7.11065	0.726867	0.00152066	0.0239037	FALSE	FALSE
ENSG00000164615	CAMLG	HAVANA	gene	5	protein_coding	7.2842	6.71475	0.569455	0.00152016	0.0239037	FALSE	FALSE
ENSG00000138434	ITPRID2	HAVANA	gene	17	protein_coding	5.73587	6.43683	-0.700956	0.00152625	0.0239623	FALSE	FALSE
ENSG00000168439	STIP1	HAVANA	gene	16	protein_coding	6.74769	6.10999	0.637699	0.00153272	0.0240201	FALSE	FALSE
ENSG00000182963	GJC1	HAVANA	gene	10	protein_coding	1.41191	2.96691	-1.555	0.00153368	0.0240201	TRUE	FALSE
ENSG00000143153	ATP1B1	HAVANA	gene	13	protein_coding	11.15	10.1726	0.977333	0.00154038	0.0240957	FALSE	FALSE
ENSG00000119446	RBM18	HAVANA	gene	14	protein_coding	5.95653	5.25826	0.698269	0.00154763	0.0241796	FALSE	FALSE
ENSG00000110514	MADD	HAVANA	gene	19	protein_coding	7.20012	6.64389	0.556224	0.0015574	0.0243026	FALSE	FALSE
ENSG00000155097	ATP6V1C1	HAVANA	gene	12	protein_coding	7.59834	6.80504	0.793306	0.00156002	0.0243139	FALSE	FALSE
ENSG00000163162	RNF149	HAVANA	gene	9	protein_coding	5.6186	4.93601	0.682591	0.00156431	0.0243513	FALSE	FALSE
ENSG00000068366	ACSL4	HAVANA	gene	20	protein_coding	7.19986	6.42438	0.775473	0.00156797	0.0243786	FALSE	FALSE
ENSG00000230084	AC006059.1	HAVANA	gene	6	lncRNA	2.58528	3.92834	-1.34306	0.00158636	0.0246347	TRUE	FALSE
ENSG00000104375	STK3	HAVANA	gene	17	protein_coding	1.98421	3.39738	-1.41317	0.00159763	0.0247631	TRUE	FALSE
ENSG00000105767	CADM4	HAVANA	gene	3	protein_coding	6.75078	7.21928	-0.468499	0.00159849	0.0247631	FALSE	FALSE
ENSG00000026652	AGPAT4	HAVANA	gene	15	protein_coding	5.74793	6.34594	-0.59801	0.00160333	0.0248081	FALSE	FALSE
ENSG00000108830	RND2	HAVANA	gene	10	protein_coding	7.05565	7.74286	-0.68721	0.00161297	0.0249273	FALSE	FALSE
ENSG00000147862	NFIB	HAVANA	gene	17	protein_coding	5.76393	6.39659	-0.632666	0.00161571	0.0249296	FALSE	FALSE
ENSG00000189159	JPT1	HAVANA	gene	16	protein_coding	7.45135	6.41946	1.03189	0.00161701	0.0249296	TRUE	FALSE
ENSG00000139880	CDH24	HAVANA	gene	19	protein_coding	4.36256	3.31241	1.05015	0.00161908	0.0249314	TRUE	FALSE
ENSG00000175606	TMEM70	HAVANA	gene	11	protein_coding	6.09431	5.33278	0.761525	0.00162976	0.0250359	FALSE	FALSE
ENSG00000186862	PDZD7	HAVANA	gene	20	protein_coding	4.38557	3.62127	0.764301	0.00162908	0.0250359	FALSE	FALSE
ENSG00000052749	RRP12	HAVANA	gene	13	protein_coding	5.10087	4.51693	0.583939	0.00163516	0.0250887	FALSE	FALSE
ENSG00000228594	FNDC10	HAVANA	gene	4	protein_coding	6.66346	6.18806	0.475394	0.00163947	0.0250898	FALSE	FALSE
ENSG00000079819	EPB41L2	HAVANA	gene	19	protein_coding	5.91514	6.55421	-0.639069	0.00164028	0.0250898	FALSE	FALSE
ENSG00000146425	DYNLT1	HAVANA	gene	11	protein_coding	4.52926	5.23956	-0.710294	0.00164109	0.0250898	FALSE	FALSE
ENSG00000115657	ABCB6	HAVANA	gene	14	protein_coding	5.62374	4.84486	0.778883	0.00165251	0.0252342	FALSE	FALSE
ENSG00000175414	ARL10	HAVANA	gene	7	protein_coding	3.48237	4.2066	-0.724229	0.0016684	0.0254465	FALSE	FALSE
ENSG00000008056	SYN1	HAVANA	gene	14	protein_coding	8.49477	7.90478	0.589988	0.00167145	0.0254627	FALSE	FALSE
ENSG00000168175	MAPK1IP1L	HAVANA	gene	15	protein_coding	6.73047	6.19223	0.538239	0.00167463	0.025481	FALSE	FALSE
ENSG00000149243	KLHL35	HAVANA	gene	15	protein_coding	4.47865	3.48297	0.995678	0.00167783	0.0254856	FALSE	FALSE
ENSG00000197045	GMFB	HAVANA	gene	13	protein_coding	7.44166	6.9255	0.516168	0.0016789	0.0254856	FALSE	FALSE
ENSG00000213341	CHUK	HAVANA	gene	11	protein_coding	4.74301	4.02315	0.719854	0.00169391	0.0255106	FALSE	FALSE
ENSG00000133818	RRAS2	HAVANA	gene	14	protein_coding	4.50156	3.52229	0.979268	0.00169447	0.0255106	FALSE	FALSE
ENSG00000139182	CLSTN3	HAVANA	gene	15	protein_coding	7.68449	7.00759	0.676903	0.00168351	0.0255106	FALSE	FALSE
ENSG00000175322	ZNF519	HAVANA	gene	11	protein_coding	1.55582	2.97063	-1.41481	0.00169059	0.0255106	TRUE	FALSE
ENSG00000105676	ARMC6	HAVANA	gene	14	protein_coding	5.31771	4.66363	0.654076	0.00168522	0.0255106	FALSE	FALSE
ENSG00000171443	ZNF524	HAVANA	gene	7	protein_coding	2.22548	3.71681	-1.49133	0.00169247	0.0255106	TRUE	FALSE
ENSG00000169239	CA5B	HAVANA	gene	13	protein_coding	3.86102	4.72925	-0.868238	0.00168882	0.0255106	FALSE	FALSE
ENSG00000134444	RELCH	HAVANA	gene	14	protein_coding	5.686	5.01212	0.673884	0.00169959	0.0255576	FALSE	FALSE
ENSG00000185950	IRS2	HAVANA	gene	9	protein_coding	7.11094	6.44403	0.666906	0.0017156	0.0257434	FALSE	FALSE
ENSG00000086758	HUWE1	HAVANA	gene	16	protein_coding	7.38937	6.85856	0.530813	0.00171596	0.0257434	FALSE	FALSE
ENSG00000261675	AL022313.4	HAVANA	gene	1	lncRNA	4.17405	3.37194	0.802109	0.00174329	0.0261228	FALSE	FALSE
ENSG00000101457	DNTTIP1	HAVANA	gene	13	protein_coding	4.3891	4.96035	-0.571256	0.00174745	0.0261546	FALSE	FALSE
ENSG00000067221	STOML1	HAVANA	gene	14	protein_coding	6.96887	6.29474	0.674127	0.00175424	0.0262257	FALSE	FALSE
ENSG00000163618	CADPS	HAVANA	gene	18	protein_coding	8.08885	7.0172	1.07166	0.00175791	0.02625	TRUE	FALSE
ENSG00000061794	MRPS35	HAVANA	gene	13	protein_coding	6.09863	5.37939	0.719238	0.00176372	0.0262755	FALSE	FALSE
ENSG00000091157	WDR7	HAVANA	gene	13	protein_coding	7.11495	6.29342	0.821533	0.00176226	0.0262755	FALSE	FALSE
ENSG00000242861	AL591895.1	HAVANA	gene	1	lncRNA	1.42952	2.74895	-1.31944	0.00177299	0.0262915	TRUE	FALSE
ENSG00000130147	SH3BP4	HAVANA	gene	16	protein_coding	3.69716	4.32701	-0.629852	0.00177208	0.0262915	FALSE	FALSE
ENSG00000153233	PTPRR	HAVANA	gene	13	protein_coding	4.96989	4.19192	0.777966	0.00177137	0.0262915	FALSE	FALSE
ENSG00000101489	CELF4	HAVANA	gene	20	protein_coding	8.10718	7.46404	0.643142	0.00176925	0.0262915	FALSE	FALSE
ENSG00000106078	COBL	HAVANA	gene	19	protein_coding	4.87265	5.62634	-0.753695	0.00177916	0.0263525	FALSE	FALSE
ENSG00000158062	UBXN11	HAVANA	gene	20	protein_coding	3.17237	4.1992	-1.02683	0.00179197	0.0264506	TRUE	FALSE
ENSG00000213145	CRIP1	HAVANA	gene	10	protein_coding	3.55791	4.71249	-1.15458	0.00178991	0.0264506	TRUE	FALSE
ENSG00000141934	PLPP2	HAVANA	gene	10	protein_coding	4.42978	5.3337	-0.903922	0.00179035	0.0264506	FALSE	FALSE
ENSG00000136531	SCN2A	HAVANA	gene	16	protein_coding	7.29686	6.71029	0.586569	0.00179461	0.0264562	FALSE	FALSE
ENSG00000145882	PCYOX1L	HAVANA	gene	11	protein_coding	5.39937	4.64386	0.755516	0.00179647	0.0264562	FALSE	FALSE
ENSG00000134575	ACP2	HAVANA	gene	12	protein_coding	6.15433	5.4817	0.672628	0.00180042	0.0264839	FALSE	FALSE
ENSG00000225706	PTPRD-AS1	HAVANA	gene	2	lncRNA	2.10462	3.61556	-1.51094	0.0018043	0.0265107	TRUE	FALSE
ENSG00000115137	DNAJC27	HAVANA	gene	12	protein_coding	5.21114	4.50287	0.708276	0.00181356	0.0266161	FALSE	FALSE
ENSG00000085831	TTC39A	HAVANA	gene	15	protein_coding	5.37537	4.06713	1.30824	0.00182974	0.0267313	TRUE	FALSE
ENSG00000162378	ZYG11B	HAVANA	gene	13	protein_coding	7.24229	6.77075	0.471532	0.00182462	0.0267313	FALSE	FALSE
ENSG00000154096	THY1	HAVANA	gene	13	protein_coding	9.81495	9.02687	0.788076	0.00182708	0.0267313	FALSE	FALSE
ENSG00000180340	FZD2	HAVANA	gene	7	protein_coding	3.99668	3.22107	0.775611	0.00182896	0.0267313	FALSE	FALSE
ENSG00000138834	MAPK8IP3	HAVANA	gene	12	protein_coding	7.90621	7.43379	0.472423	0.00183536	0.026783	FALSE	FALSE
ENSG00000107643	MAPK8	HAVANA	gene	16	protein_coding	5.89602	5.20869	0.687327	0.00183802	0.0267913	FALSE	FALSE
ENSG00000248367	AC008610.1	HAVANA	gene	1	lncRNA	1.67351	2.64461	-0.971099	0.00186502	0.0270024	FALSE	FALSE
ENSG00000151208	DLG5	HAVANA	gene	17	protein_coding	3.17372	4.08704	-0.913323	0.00186552	0.0270024	FALSE	FALSE
ENSG00000021300	PLEKHB1	HAVANA	gene	14	protein_coding	9.19492	9.68595	-0.491033	0.00185582	0.0270024	FALSE	FALSE
ENSG00000214517	PPME1	HAVANA	gene	10	protein_coding	6.69957	6.10489	0.594677	0.0018607	0.0270024	FALSE	FALSE
ENSG00000149557	FEZ1	HAVANA	gene	14	protein_coding	8.22769	8.66774	-0.440056	0.00186935	0.0270024	FALSE	FALSE
ENSG00000122034	GTF3A	HAVANA	gene	15	protein_coding	6.22828	5.73404	0.494234	0.00186573	0.0270024	FALSE	FALSE
ENSG00000130208	APOC1	HAVANA	gene	9	protein_coding	7.97909	7.17555	0.803543	0.00186783	0.0270024	FALSE	FALSE
ENSG00000101210	EEF1A2	HAVANA	gene	12	protein_coding	9.39621	8.49368	0.902536	0.00185692	0.0270024	FALSE	FALSE
ENSG00000283462	AC008505.1	HAVANA	gene	2	lncRNA	1.76851	2.87448	-1.10597	0.00187446	0.0270154	TRUE	FALSE
ENSG00000151233	GXYLT1	HAVANA	gene	11	protein_coding	4.28632	3.40367	0.882647	0.00187259	0.0270154	FALSE	FALSE
ENSG00000250208	FZD10-AS1	HAVANA	gene	6	lncRNA	2.05095	3.32909	-1.27814	0.00187966	0.02706	TRUE	FALSE
ENSG00000182134	TDRKH	HAVANA	gene	16	protein_coding	4.8056	3.96915	0.836454	0.00188332	0.0270822	FALSE	FALSE
ENSG00000248285	AC122707.1	HAVANA	gene	1	lncRNA	1.78997	3.27508	-1.48511	0.00189101	0.0271624	TRUE	FALSE
ENSG00000005893	LAMP2	HAVANA	gene	15	protein_coding	7.02515	7.55553	-0.530384	0.00189416	0.0271771	FALSE	FALSE
ENSG00000100934	SEC23A	HAVANA	gene	15	protein_coding	6.85209	6.19968	0.652418	0.00191675	0.0274409	FALSE	FALSE
ENSG00000187135	VSTM2B	HAVANA	gene	7	protein_coding	3.41452	4.44474	-1.03022	0.00191682	0.0274409	TRUE	FALSE
ENSG00000114315	HES1	HAVANA	gene	4	protein_coding	4.85782	5.49333	-0.63551	0.00193169	0.027623	FALSE	FALSE
ENSG00000176407	KCMF1	HAVANA	gene	18	protein_coding	6.26205	5.69783	0.564221	0.00193781	0.0276796	FALSE	FALSE
ENSG00000121769	FABP3	HAVANA	gene	8	protein_coding	6.64825	5.98703	0.661222	0.00195528	0.0277761	FALSE	FALSE
ENSG00000132688	NES	HAVANA	gene	11	protein_coding	3.75513	4.6156	-0.860473	0.00195756	0.0277761	FALSE	FALSE
ENSG00000168348	INSM2	HAVANA	gene	4	protein_coding	2.99456	1.48802	1.50655	0.00195573	0.0277761	TRUE	FALSE
ENSG00000063761	ADCK1	HAVANA	gene	16	protein_coding	4.22422	3.49968	0.72454	0.00195319	0.0277761	FALSE	FALSE
ENSG00000129355	CDKN2D	HAVANA	gene	7	protein_coding	7.48147	6.68143	0.800041	0.00195606	0.0277761	FALSE	FALSE
ENSG00000077721	UBE2A	HAVANA	gene	16	protein_coding	5.72082	5.07386	0.646962	0.0019538	0.0277761	FALSE	FALSE
ENSG00000116983	HPCAL4	HAVANA	gene	13	protein_coding	7.45355	6.89843	0.555119	0.00196538	0.0277948	FALSE	FALSE
ENSG00000023909	GCLM	HAVANA	gene	10	protein_coding	5.80678	5.06532	0.74146	0.00196472	0.0277948	FALSE	FALSE
ENSG00000131437	KIF3A	HAVANA	gene	15	protein_coding	8.34041	7.62164	0.718765	0.0019617	0.0277948	FALSE	FALSE
ENSG00000060140	STYK1	HAVANA	gene	9	protein_coding	3.47668	2.3202	1.15648	0.00197298	0.0278537	TRUE	FALSE
ENSG00000103184	SEC14L5	HAVANA	gene	12	protein_coding	4.28032	5.23284	-0.952528	0.00197605	0.0278537	FALSE	FALSE
ENSG00000132872	SYT4	HAVANA	gene	12	protein_coding	9.02389	8.21427	0.809627	0.00197581	0.0278537	FALSE	FALSE
ENSG00000198952	SMG5	HAVANA	gene	8	protein_coding	6.12073	5.56752	0.55321	0.00199871	0.028019	FALSE	FALSE
ENSG00000188338	SLC38A3	HAVANA	gene	15	protein_coding	4.0905	5.2243	-1.1338	0.00199678	0.028019	TRUE	FALSE
ENSG00000166446	CDYL2	HAVANA	gene	15	protein_coding	5.34052	4.47866	0.861864	0.00199325	0.028019	FALSE	FALSE
ENSG00000103335	PIEZO1	HAVANA	gene	22	protein_coding	3.91592	4.53375	-0.617834	0.00199699	0.028019	FALSE	FALSE
ENSG00000184900	SUMO3	HAVANA	gene	15	protein_coding	8.10979	7.61523	0.494563	0.00199108	0.028019	FALSE	FALSE
ENSG00000253948	VPS13B-DT	HAVANA	gene	2	lncRNA	3.98565	4.90537	-0.919721	0.00201552	0.0281386	FALSE	FALSE
ENSG00000259953	AL138756.1	HAVANA	gene	2	lncRNA	4.20492	3.00345	1.20147	0.00201644	0.0281386	TRUE	FALSE
ENSG00000187688	TRPV2	HAVANA	gene	15	protein_coding	5.07923	4.13656	0.942677	0.00201178	0.0281386	FALSE	FALSE
ENSG00000131095	GFAP	HAVANA	gene	13	protein_coding	12.4834	13.0808	-0.597355	0.00201821	0.0281386	FALSE	FALSE
ENSG00000105193	RPS16	HAVANA	gene	9	protein_coding	8.48033	9.03325	-0.552914	0.00201251	0.0281386	FALSE	FALSE
ENSG00000111249	CUX2	HAVANA	gene	14	protein_coding	3.99071	2.94376	1.04695	0.00203271	0.0283101	TRUE	FALSE
ENSG00000139438	FAM222A	HAVANA	gene	5	protein_coding	4.74059	5.55602	-0.815428	0.00204001	0.0283809	FALSE	FALSE
ENSG00000157978	LDLRAP1	HAVANA	gene	11	protein_coding	3.69427	4.48093	-0.78666	0.00205105	0.0284727	FALSE	FALSE
ENSG00000187231	SESTD1	HAVANA	gene	14	protein_coding	4.83242	5.40018	-0.567766	0.0020507	0.0284727	FALSE	FALSE
ENSG00000157064	NMNAT2	HAVANA	gene	11	protein_coding	7.12854	6.42685	0.701693	0.00206127	0.0285676	FALSE	FALSE
ENSG00000196715	VKORC1L1	HAVANA	gene	7	protein_coding	6.24435	5.42656	0.817791	0.00207198	0.0285676	FALSE	FALSE
ENSG00000133878	DUSP26	HAVANA	gene	9	protein_coding	6.92919	6.18564	0.743542	0.00207347	0.0285676	FALSE	FALSE
ENSG00000165757	JCAD	HAVANA	gene	9	protein_coding	3.49628	4.27459	-0.77831	0.0020675	0.0285676	FALSE	FALSE
ENSG00000137692	DCUN1D5	HAVANA	gene	12	protein_coding	5.43179	4.58452	0.847269	0.00207243	0.0285676	FALSE	FALSE
ENSG00000092068	SLC7A8	HAVANA	gene	20	protein_coding	4.63255	3.5012	1.13136	0.00207194	0.0285676	TRUE	FALSE
ENSG00000115255	REEP6	HAVANA	gene	11	protein_coding	3.4835	4.38126	-0.89776	0.00206603	0.0285676	FALSE	FALSE
ENSG00000196743	GM2A	HAVANA	gene	9	protein_coding	4.55928	5.32399	-0.764711	0.00207955	0.0285899	FALSE	FALSE
ENSG00000104883	PEX11G	HAVANA	gene	8	protein_coding	2.0177	3.03895	-1.02125	0.00207788	0.0285899	TRUE	FALSE
ENSG00000162704	ARPC5	HAVANA	gene	16	protein_coding	7.16887	6.67766	0.491207	0.00208514	0.0286134	FALSE	FALSE
ENSG00000182287	AP1S2	HAVANA	gene	15	protein_coding	7.69141	6.94626	0.745151	0.00208572	0.0286134	FALSE	FALSE
ENSG00000096384	HSP90AB1	HAVANA	gene	20	protein_coding	10.8773	10.2673	0.610018	0.00208988	0.0286277	FALSE	FALSE
ENSG00000133805	AMPD3	HAVANA	gene	15	protein_coding	3.86577	4.6108	-0.745034	0.00209122	0.0286277	FALSE	FALSE
ENSG00000214548	MEG3	HAVANA	gene	18	lncRNA	9.00796	8.40788	0.600078	0.00209609	0.0286637	FALSE	FALSE
ENSG00000088881	EBF4	HAVANA	gene	20	protein_coding	4.14433	4.853	-0.708671	0.00211038	0.0288283	FALSE	FALSE
ENSG00000177954	RPS27	HAVANA	gene	14	protein_coding	9.91188	10.4198	-0.507935	0.00211279	0.0288306	FALSE	FALSE
ENSG00000099904	ZDHHC8	HAVANA	gene	15	protein_coding	5.73359	5.15667	0.576918	0.00211713	0.0288591	FALSE	FALSE
ENSG00000119782	FKBP1B	HAVANA	gene	14	protein_coding	6.2028	5.25186	0.950935	0.00212155	0.0288887	FALSE	FALSE
ENSG00000158856	DMTN	HAVANA	gene	18	protein_coding	7.65553	6.9917	0.663828	0.00213203	0.0289697	FALSE	FALSE
ENSG00000170581	STAT2	HAVANA	gene	14	protein_coding	5.7114	6.22237	-0.510972	0.00213428	0.0289697	FALSE	FALSE
ENSG00000147224	PRPS1	HAVANA	gene	11	protein_coding	7.11833	6.49105	0.627281	0.00213059	0.0289697	FALSE	FALSE
ENSG00000196230	TUBB	HAVANA	gene	13	protein_coding	9.61453	8.81327	0.801265	0.00213931	0.0290073	FALSE	FALSE
ENSG00000134324	LPIN1	HAVANA	gene	11	protein_coding	6.95511	6.42628	0.528831	0.00215091	0.0291031	FALSE	FALSE
ENSG00000072832	CRMP1	HAVANA	gene	15	protein_coding	7.4414	6.71282	0.72858	0.00215026	0.0291031	FALSE	FALSE
ENSG00000153113	CAST	HAVANA	gene	23	protein_coding	6.46088	5.90885	0.552026	0.00215891	0.0291805	FALSE	FALSE
ENSG00000164128	NPY1R	HAVANA	gene	7	protein_coding	1.7389	2.89751	-1.15861	0.00216629	0.0292494	TRUE	FALSE
ENSG00000145592	RPL37	HAVANA	gene	14	protein_coding	9.65544	10.238	-0.582588	0.00218352	0.0293943	FALSE	FALSE
ENSG00000105974	CAV1	HAVANA	gene	12	protein_coding	1.49437	3.04906	-1.55469	0.00218003	0.0293943	TRUE	FALSE
ENSG00000071859	FAM50A	HAVANA	gene	15	protein_coding	6.43662	5.93198	0.504631	0.00218389	0.0293943	FALSE	FALSE
ENSG00000151881	TMEM267	HAVANA	gene	14	protein_coding	3.92284	3.16428	0.758555	0.00219124	0.0294622	FALSE	FALSE
ENSG00000181638	ZFP41	HAVANA	gene	18	protein_coding	4.66557	3.9563	0.709271	0.00219743	0.0294837	FALSE	FALSE
ENSG00000167460	TPM4	HAVANA	gene	17	protein_coding	5.86221	6.52024	-0.658026	0.00219694	0.0294837	FALSE	FALSE
ENSG00000152910	CNTNAP4	HAVANA	gene	19	protein_coding	5.81141	6.60881	-0.797398	0.00220158	0.0295085	FALSE	FALSE
ENSG00000181826	RELL1	HAVANA	gene	10	protein_coding	4.67277	5.39375	-0.720983	0.00220758	0.0295533	FALSE	FALSE
ENSG00000112531	QKI	HAVANA	gene	17	protein_coding	9.01652	9.46986	-0.453346	0.00220952	0.0295533	FALSE	FALSE
ENSG00000188573	FBLL1	HAVANA	gene	8	protein_coding	7.29841	6.67256	0.625846	0.0022157	0.0295703	FALSE	FALSE
ENSG00000171766	GATM	HAVANA	gene	16	protein_coding	6.78734	7.47489	-0.687544	0.00221772	0.0295703	FALSE	FALSE
ENSG00000128989	ARPP19	HAVANA	gene	10	protein_coding	8.82963	8.3773	0.452332	0.00221573	0.0295703	FALSE	FALSE
ENSG00000125285	SOX21	HAVANA	gene	6	protein_coding	3.86363	4.73914	-0.875509	0.00222431	0.0296059	FALSE	FALSE
ENSG00000121064	SCPEP1	HAVANA	gene	12	protein_coding	6.13557	5.57368	0.561887	0.002225	0.0296059	FALSE	FALSE
ENSG00000243989	ACY1	HAVANA	gene	9	protein_coding	3.30403	4.08178	-0.777751	0.00223918	0.0297637	FALSE	FALSE
ENSG00000156471	PTDSS1	HAVANA	gene	13	protein_coding	6.85409	6.10563	0.748464	0.00224416	0.029799	FALSE	FALSE
ENSG00000011083	SLC6A7	HAVANA	gene	9	protein_coding	3.23808	4.03264	-0.794567	0.00224854	0.0298263	FALSE	FALSE
ENSG00000140332	TLE3	HAVANA	gene	16	protein_coding	5.52017	4.77205	0.748113	0.00225987	0.0299456	FALSE	FALSE
ENSG00000105778	AVL9	HAVANA	gene	19	protein_coding	5.99196	5.37656	0.615392	0.00227271	0.0300619	FALSE	FALSE
ENSG00000080824	HSP90AA1	HAVANA	gene	18	protein_coding	11.9271	11.3199	0.607199	0.00227333	0.0300619	FALSE	FALSE
ENSG00000160285	LSS	HAVANA	gene	15	protein_coding	7.16067	6.56411	0.596553	0.00228671	0.0301766	FALSE	FALSE
ENSG00000133424	LARGE1	HAVANA	gene	20	protein_coding	5.39374	4.61673	0.777001	0.00228498	0.0301766	FALSE	FALSE
ENSG00000135622	SEMA4F	HAVANA	gene	13	protein_coding	4.97914	4.42256	0.556572	0.00229442	0.0301852	FALSE	FALSE
ENSG00000157470	FAM81A	HAVANA	gene	12	protein_coding	4.40544	3.60523	0.800215	0.00229362	0.0301852	FALSE	FALSE
ENSG00000105698	USF2	HAVANA	gene	16	protein_coding	6.56276	7.07928	-0.516521	0.00229187	0.0301852	FALSE	FALSE
ENSG00000171488	LRRC8C	HAVANA	gene	15	protein_coding	4.27642	3.53246	0.743953	0.00230496	0.0302618	FALSE	FALSE
ENSG00000138772	ANXA3	HAVANA	gene	13	protein_coding	2.00946	3.31929	-1.30983	0.0023039	0.0302618	TRUE	FALSE
ENSG00000006831	ADIPOR2	HAVANA	gene	10	protein_coding	5.3147	6.02848	-0.713781	0.00230768	0.0302665	FALSE	FALSE
ENSG00000115665	SLC5A7	HAVANA	gene	9	protein_coding	3.91153	2.40264	1.50889	0.00231077	0.030276	TRUE	FALSE
ENSG00000058262	SEC61A1	HAVANA	gene	10	protein_coding	6.93316	6.31906	0.614092	0.00232117	0.0303813	FALSE	FALSE
ENSG00000120162	MOB3B	HAVANA	gene	10	protein_coding	4.27385	5.10858	-0.834722	0.00232638	0.0304184	FALSE	FALSE
ENSG00000164054	SHISA5	HAVANA	gene	15	protein_coding	7.18531	6.69727	0.488034	0.00233842	0.030527	FALSE	FALSE
ENSG00000061918	GUCY1B1	HAVANA	gene	13	protein_coding	8.12966	7.53482	0.59484	0.00233948	0.030527	FALSE	FALSE
ENSG00000278376	AP004609.3	HAVANA	gene	1	lncRNA	3.37764	4.42193	-1.04429	0.00234182	0.030527	TRUE	FALSE
ENSG00000146386	ABRACL	HAVANA	gene	8	protein_coding	4.15514	2.96028	1.19486	0.00234796	0.0305759	TRUE	FALSE
ENSG00000197965	MPZL1	HAVANA	gene	12	protein_coding	6.08759	5.53259	0.554996	0.00236119	0.0306577	FALSE	FALSE
ENSG00000134108	ARL8B	HAVANA	gene	13	protein_coding	7.66236	7.07146	0.590897	0.00236837	0.0306577	FALSE	FALSE
ENSG00000112306	RPS12	HAVANA	gene	8	protein_coding	9.59937	10.0951	-0.495701	0.00236544	0.0306577	FALSE	FALSE
ENSG00000066933	MYO9A	HAVANA	gene	16	protein_coding	5.88602	5.28041	0.605607	0.00236311	0.0306577	FALSE	FALSE
ENSG00000171953	ATPAF2	HAVANA	gene	16	protein_coding	4.43076	3.78161	0.649149	0.00236858	0.0306577	FALSE	FALSE
ENSG00000161714	PLCD3	HAVANA	gene	12	protein_coding	5.69528	6.25615	-0.560873	0.00236118	0.0306577	FALSE	FALSE
ENSG00000115091	ACTR3	HAVANA	gene	12	protein_coding	6.88273	6.26906	0.61367	0.00237561	0.0307177	FALSE	FALSE
ENSG00000174136	RGMB	HAVANA	gene	13	protein_coding	7.31798	6.55098	0.766999	0.00237979	0.0307407	FALSE	FALSE
ENSG00000223797	ENTPD3-AS1	HAVANA	gene	6	lncRNA	3.26619	4.14737	-0.881186	0.00238873	0.0308039	FALSE	FALSE
ENSG00000179144	GIMAP7	HAVANA	gene	5	protein_coding	1.81696	3.19094	-1.37399	0.00238948	0.0308039	TRUE	FALSE
ENSG00000104756	KCTD9	HAVANA	gene	16	protein_coding	5.37011	4.57003	0.800081	0.00239656	0.0308608	FALSE	FALSE
ENSG00000119138	KLF9	HAVANA	gene	4	protein_coding	4.97259	5.64379	-0.671202	0.00239871	0.0308608	FALSE	FALSE
ENSG00000258301	VASH1-AS1	HAVANA	gene	3	lncRNA	3.13797	3.65264	-0.514669	0.002404	0.0308979	FALSE	FALSE
ENSG00000150753	CCT5	HAVANA	gene	12	protein_coding	7.59667	6.92918	0.667492	0.00241006	0.0309163	FALSE	FALSE
ENSG00000198682	PAPSS2	HAVANA	gene	13	protein_coding	2.09892	3.06057	-0.961647	0.00241025	0.0309163	FALSE	FALSE
ENSG00000168214	RBPJ	HAVANA	gene	20	protein_coding	6.00492	6.44672	-0.441805	0.00242391	0.0310545	FALSE	FALSE
ENSG00000058091	CDK14	HAVANA	gene	17	protein_coding	6.58783	5.82875	0.759082	0.00243313	0.0310545	FALSE	FALSE
ENSG00000008311	AASS	HAVANA	gene	15	protein_coding	2.81219	4.44105	-1.62886	0.00242726	0.0310545	TRUE	FALSE
ENSG00000148120	AOPEP	HAVANA	gene	16	protein_coding	3.74184	4.49254	-0.750707	0.00243194	0.0310545	FALSE	FALSE
ENSG00000142197	DOP1B	HAVANA	gene	12	protein_coding	4.41128	3.67004	0.741242	0.00243234	0.0310545	FALSE	FALSE
ENSG00000184185	KCNJ12	HAVANA	gene	10	protein_coding	3.90054	2.91591	0.984633	0.00243905	0.0310991	FALSE	FALSE
ENSG00000065361	ERBB3	HAVANA	gene	15	protein_coding	4.76424	5.64043	-0.876182	0.00244806	0.031183	FALSE	FALSE
ENSG00000184584	TMEM173	HAVANA	gene	13	protein_coding	1.80864	3.30553	-1.49689	0.00245368	0.0311926	TRUE	FALSE
ENSG00000266402	SNHG25	HAVANA	gene	3	lncRNA	7.22255	7.72976	-0.507212	0.00245241	0.0311926	FALSE	FALSE
ENSG00000114923	SLC4A3	HAVANA	gene	17	protein_coding	7.00459	6.35945	0.64514	0.00245644	0.0311968	FALSE	FALSE
ENSG00000101972	STAG2	HAVANA	gene	18	protein_coding	5.41118	5.86615	-0.454967	0.0024638	0.0312593	FALSE	FALSE
ENSG00000039319	ZFYVE16	HAVANA	gene	17	protein_coding	5.28202	5.72467	-0.442655	0.00248791	0.0314718	FALSE	FALSE
ENSG00000075089	ACTR6	HAVANA	gene	9	protein_coding	6.13753	5.36433	0.773196	0.00248748	0.0314718	FALSE	FALSE
ENSG00000101463	SYNDIG1	HAVANA	gene	6	protein_coding	4.52087	5.45198	-0.931111	0.00248609	0.0314718	FALSE	FALSE
ENSG00000116299	KIAA1324	HAVANA	gene	17	protein_coding	4.66946	3.98115	0.688315	0.0024984	0.0315734	FALSE	FALSE
ENSG00000076555	ACACB	HAVANA	gene	15	protein_coding	3.46273	4.20108	-0.738348	0.00250478	0.0316229	FALSE	FALSE
ENSG00000163900	TMEM41A	HAVANA	gene	11	protein_coding	4.70404	4.0033	0.700737	0.00251342	0.0317007	FALSE	FALSE
ENSG00000215845	TSTD1	HAVANA	gene	11	protein_coding	4.30811	3.44437	0.863732	0.00254108	0.0319866	FALSE	FALSE
ENSG00000113231	PDE8B	HAVANA	gene	13	protein_coding	6.01244	5.36726	0.645178	0.00254075	0.0319866	FALSE	FALSE
ENSG00000167513	CDT1	HAVANA	gene	9	protein_coding	2.10212	3.19437	-1.09225	0.00255231	0.0320966	TRUE	FALSE
ENSG00000138639	ARHGAP24	HAVANA	gene	18	protein_coding	5.11748	4.249	0.868475	0.00256007	0.032109	FALSE	FALSE
ENSG00000125170	DOK4	HAVANA	gene	11	protein_coding	4.45249	3.71793	0.734557	0.00255636	0.032109	FALSE	FALSE
ENSG00000159753	CARMIL2	HAVANA	gene	14	protein_coding	5.4611	4.82605	0.63505	0.00256262	0.032109	FALSE	FALSE
ENSG00000102096	PIM2	HAVANA	gene	9	protein_coding	4.7729	4.10816	0.664737	0.00256332	0.032109	FALSE	FALSE
ENSG00000206530	CFAP44	HAVANA	gene	11	protein_coding	1.5125	2.73934	-1.22684	0.00257866	0.0322383	TRUE	FALSE
ENSG00000106105	GARS	HAVANA	gene	14	protein_coding	6.43108	5.51148	0.919608	0.00257696	0.0322383	FALSE	FALSE
ENSG00000158079	PTPDC1	HAVANA	gene	16	protein_coding	3.64559	4.2064	-0.560816	0.00258173	0.0322452	FALSE	FALSE
ENSG00000033627	ATP6V0A1	HAVANA	gene	16	protein_coding	8.65013	8.10891	0.541228	0.00259389	0.0323374	FALSE	FALSE
ENSG00000261409	AL035425.3	HAVANA	gene	1	lncRNA	4.13478	3.03595	1.09883	0.00259415	0.0323374	TRUE	FALSE
ENSG00000173166	RAPH1	HAVANA	gene	18	protein_coding	5.80842	5.11762	0.690803	0.00259948	0.0323724	FALSE	FALSE
ENSG00000069482	GAL	HAVANA	gene	7	protein_coding	4.2246	2.84713	1.37747	0.00261291	0.032508	TRUE	FALSE
ENSG00000163946	TASOR	HAVANA	gene	13	protein_coding	4.38822	4.89592	-0.507703	0.0026309	0.0327001	FALSE	FALSE
ENSG00000169291	SHE	HAVANA	gene	10	protein_coding	1.5312	2.7182	-1.18701	0.00263624	0.0327031	TRUE	FALSE
ENSG00000188706	ZDHHC9	HAVANA	gene	13	protein_coding	5.20436	6.11336	-0.908997	0.002635	0.0327031	FALSE	FALSE
ENSG00000179364	PACS2	HAVANA	gene	13	protein_coding	6.86349	7.39984	-0.536356	0.00264646	0.0327982	FALSE	FALSE
ENSG00000071462	BUD23	HAVANA	gene	11	protein_coding	6.04348	5.52215	0.521324	0.00266048	0.0329083	FALSE	FALSE
ENSG00000079435	LIPE	HAVANA	gene	10	protein_coding	4.881	5.53955	-0.658543	0.00265938	0.0329083	FALSE	FALSE
ENSG00000167930	FAM234A	HAVANA	gene	17	protein_coding	5.52236	6.08068	-0.558315	0.00266671	0.0329536	FALSE	FALSE
ENSG00000182809	CRIP2	HAVANA	gene	10	protein_coding	7.81663	7.28399	0.532638	0.00267677	0.0330144	FALSE	FALSE
ENSG00000103145	HCFC1R1	HAVANA	gene	10	protein_coding	8.22682	7.68722	0.539601	0.00267435	0.0330144	FALSE	FALSE
ENSG00000065154	OAT	HAVANA	gene	11	protein_coding	8.10516	7.46423	0.640934	0.00268821	0.0331236	FALSE	FALSE
ENSG00000237172	B3GNT9	HAVANA	gene	4	protein_coding	2.27132	3.2065	-0.935183	0.00270812	0.0333369	FALSE	FALSE
ENSG00000139597	N4BP2L1	HAVANA	gene	18	protein_coding	3.86912	4.86231	-0.993196	0.00271135	0.0333446	FALSE	FALSE
ENSG00000124493	GRM4	HAVANA	gene	13	protein_coding	4.24768	2.9388	1.30888	0.00274581	0.0336716	TRUE	FALSE
ENSG00000008513	ST3GAL1	HAVANA	gene	16	protein_coding	1.17414	2.37901	-1.20487	0.00274486	0.0336716	TRUE	FALSE
ENSG00000139629	GALNT6	HAVANA	gene	16	protein_coding	2.7206	4.13012	-1.40952	0.00274581	0.0336716	TRUE	FALSE
ENSG00000132780	NASP	HAVANA	gene	17	protein_coding	4.96146	5.64231	-0.680852	0.00275998	0.0337868	FALSE	FALSE
ENSG00000171763	SPATA5L1	HAVANA	gene	19	protein_coding	2.31226	3.01593	-0.703673	0.0027631	0.0337868	FALSE	FALSE
ENSG00000266844	AC093330.1	HAVANA	gene	1	lncRNA	2.51221	4.15628	-1.64407	0.00276118	0.0337868	TRUE	FALSE
ENSG00000099256	PRTFDC1	HAVANA	gene	19	protein_coding	3.98675	4.73902	-0.752272	0.00278156	0.03398	FALSE	FALSE
ENSG00000254585	MAGEL2	HAVANA	gene	5	protein_coding	4.84911	3.85004	0.999067	0.00279745	0.0341417	FALSE	FALSE
ENSG00000257337	AC068888.1	HAVANA	gene	7	lncRNA	3.73725	4.5461	-0.808851	0.00280335	0.0341811	FALSE	FALSE
ENSG00000044115	CTNNA1	HAVANA	gene	21	protein_coding	6.78112	7.31385	-0.532733	0.00280719	0.0341954	FALSE	FALSE
ENSG00000186577	SMIM29	HAVANA	gene	14	protein_coding	7.63411	7.02879	0.605316	0.00281605	0.0342384	FALSE	FALSE
ENSG00000167699	GLOD4	HAVANA	gene	13	protein_coding	6.47377	5.84366	0.630112	0.00281434	0.0342384	FALSE	FALSE
ENSG00000167995	BEST1	HAVANA	gene	16	protein_coding	3.94383	4.67914	-0.735311	0.00282006	0.0342547	FALSE	FALSE
ENSG00000160145	KALRN	HAVANA	gene	15	protein_coding	2.64788	3.90184	-1.25396	0.00283365	0.0343547	TRUE	FALSE
ENSG00000106772	PRUNE2	HAVANA	gene	18	protein_coding	6.90431	6.26113	0.643177	0.00283309	0.0343547	FALSE	FALSE
ENSG00000109458	GAB1	HAVANA	gene	8	protein_coding	4.30715	5.32461	-1.01746	0.00283677	0.03436	TRUE	FALSE
ENSG00000240230	COX19	HAVANA	gene	6	protein_coding	5.11802	4.50387	0.614149	0.00285197	0.0345115	FALSE	FALSE
ENSG00000132305	IMMT	HAVANA	gene	20	protein_coding	6.80779	6.22139	0.586407	0.00285553	0.034522	FALSE	FALSE
ENSG00000013293	SLC7A14	HAVANA	gene	6	protein_coding	7.09349	6.25868	0.834803	0.00287379	0.03471	FALSE	FALSE
ENSG00000171033	PKIA	HAVANA	gene	13	protein_coding	7.72557	7.01826	0.707308	0.00287968	0.0347158	FALSE	FALSE
ENSG00000213741	RPS29	HAVANA	gene	10	protein_coding	9.82826	10.3487	-0.52045	0.00287898	0.0347158	FALSE	FALSE
ENSG00000118971	CCND2	HAVANA	gene	8	protein_coding	4.83237	5.8043	-0.971936	0.00289209	0.0348327	FALSE	FALSE
ENSG00000247596	TWF2	HAVANA	gene	9	protein_coding	5.71598	4.86085	0.855128	0.00289944	0.0348335	FALSE	FALSE
ENSG00000118322	ATP10B	HAVANA	gene	14	protein_coding	2.75478	3.89921	-1.14443	0.00290178	0.0348335	TRUE	FALSE
ENSG00000122203	KIAA1191	HAVANA	gene	15	protein_coding	7.41218	6.82006	0.592117	0.00290845	0.0348335	FALSE	FALSE
ENSG00000150760	DOCK1	HAVANA	gene	12	protein_coding	4.96327	5.55693	-0.593662	0.00290802	0.0348335	FALSE	FALSE
ENSG00000140262	TCF12	HAVANA	gene	17	protein_coding	4.74159	5.33628	-0.594696	0.00290626	0.0348335	FALSE	FALSE
ENSG00000100362	PVALB	HAVANA	gene	13	protein_coding	4.34947	5.54961	-1.20014	0.00289725	0.0348335	TRUE	FALSE
ENSG00000110801	PSMD9	HAVANA	gene	14	protein_coding	5.30071	4.74201	0.558697	0.00291432	0.0348712	FALSE	FALSE
ENSG00000169085	VXN	HAVANA	gene	13	protein_coding	5.54551	6.08822	-0.542709	0.00292232	0.0349344	FALSE	FALSE
ENSG00000135049	AGTPBP1	HAVANA	gene	15	protein_coding	6.15833	5.46693	0.691399	0.0029272	0.0349601	FALSE	FALSE
ENSG00000120029	ARMH3	HAVANA	gene	13	protein_coding	5.10971	4.40237	0.707343	0.00293466	0.0350166	FALSE	FALSE
ENSG00000114770	ABCC5	HAVANA	gene	17	protein_coding	6.31984	5.77257	0.547271	0.00295059	0.035174	FALSE	FALSE
ENSG00000204160	ZDHHC18	HAVANA	gene	12	protein_coding	5.52147	4.76562	0.755848	0.00295784	0.0352276	FALSE	FALSE
ENSG00000164972	C9orf24	HAVANA	gene	13	protein_coding	4.25461	5.14402	-0.889406	0.00296734	0.0352427	FALSE	FALSE
ENSG00000140488	CELF6	HAVANA	gene	16	protein_coding	6.39491	5.63313	0.761782	0.00296228	0.0352427	FALSE	FALSE
ENSG00000103148	NPRL3	HAVANA	gene	16	protein_coding	5.73904	5.15295	0.586087	0.0029673	0.0352427	FALSE	FALSE
ENSG00000134490	TMEM241	HAVANA	gene	14	protein_coding	3.02633	2.18855	0.837778	0.00297093	0.0352526	FALSE	FALSE
ENSG00000114948	ADAM23	HAVANA	gene	13	protein_coding	6.30221	5.4347	0.867509	0.00298317	0.0352674	FALSE	FALSE
ENSG00000176018	LYSMD3	HAVANA	gene	13	protein_coding	3.84962	2.67141	1.17821	0.00297865	0.0352674	TRUE	FALSE
ENSG00000146966	DENND2A	HAVANA	gene	13	protein_coding	3.8715	4.44403	-0.572534	0.00298238	0.0352674	FALSE	FALSE
ENSG00000188153	COL4A5	HAVANA	gene	13	protein_coding	3.99098	4.85458	-0.863597	0.0029826	0.0352674	FALSE	FALSE
ENSG00000166024	R3HCC1L	HAVANA	gene	13	protein_coding	1.84043	2.84391	-1.00348	0.00299913	0.0354234	TRUE	FALSE
ENSG00000133256	PDE6B	HAVANA	gene	12	protein_coding	3.7538	4.38244	-0.628642	0.00301673	0.0355332	FALSE	FALSE
ENSG00000097007	ABL1	HAVANA	gene	19	protein_coding	4.89751	5.52027	-0.622764	0.00301516	0.0355332	FALSE	FALSE
ENSG00000108590	MED31	HAVANA	gene	11	protein_coding	5.67688	4.92306	0.753822	0.00301584	0.0355332	FALSE	FALSE
ENSG00000078902	TOLLIP	HAVANA	gene	16	protein_coding	7.50123	6.92797	0.573254	0.00303096	0.035668	FALSE	FALSE
ENSG00000144712	CAND2	HAVANA	gene	12	protein_coding	4.3305	3.6011	0.729397	0.0030557	0.0359157	FALSE	FALSE
ENSG00000083290	ULK2	HAVANA	gene	20	protein_coding	5.15294	5.6294	-0.476459	0.00305761	0.0359157	FALSE	FALSE
ENSG00000168259	DNAJC7	HAVANA	gene	16	protein_coding	6.87092	6.36051	0.510406	0.00306056	0.0359175	FALSE	FALSE
ENSG00000116251	RPL22	HAVANA	gene	11	protein_coding	8.4688	8.94068	-0.471877	0.0030646	0.035932	FALSE	FALSE
ENSG00000115419	GLS	HAVANA	gene	12	protein_coding	7.66385	6.69475	0.969106	0.00307534	0.0359537	FALSE	FALSE
ENSG00000185774	KCNIP4	HAVANA	gene	16	protein_coding	7.04225	6.0307	1.01155	0.00310063	0.0359537	TRUE	FALSE
ENSG00000105855	ITGB8	HAVANA	gene	10	protein_coding	5.94751	6.68283	-0.735315	0.00309416	0.0359537	FALSE	FALSE
ENSG00000166167	BTRC	HAVANA	gene	18	protein_coding	6.23783	5.73821	0.499613	0.00309091	0.0359537	FALSE	FALSE
ENSG00000198805	PNP	HAVANA	gene	11	protein_coding	4.40851	3.48658	0.921927	0.00310289	0.0359537	FALSE	FALSE
ENSG00000140015	KCNH5	HAVANA	gene	20	protein_coding	1.87388	3.27841	-1.40454	0.00307757	0.0359537	TRUE	FALSE
ENSG00000153048	CARHSP1	HAVANA	gene	11	protein_coding	4.66131	5.22762	-0.566303	0.00309862	0.0359537	FALSE	FALSE
ENSG00000003249	DBNDD1	HAVANA	gene	13	protein_coding	6.62191	5.99506	0.62685	0.00308342	0.0359537	FALSE	FALSE
ENSG00000197170	PSMD12	HAVANA	gene	10	protein_coding	6.93614	6.23385	0.702288	0.00308612	0.0359537	FALSE	FALSE
ENSG00000177337	DLGAP1-AS1	HAVANA	gene	8	lncRNA	2.53736	3.68726	-1.1499	0.00307973	0.0359537	TRUE	FALSE
ENSG00000105137	SYDE1	HAVANA	gene	13	protein_coding	1.68741	2.9782	-1.29079	0.00309243	0.0359537	TRUE	FALSE
ENSG00000159082	SYNJ1	HAVANA	gene	17	protein_coding	7.46972	6.70464	0.765081	0.00310003	0.0359537	FALSE	FALSE
ENSG00000100300	TSPO	HAVANA	gene	18	protein_coding	5.10499	5.70358	-0.598593	0.00310188	0.0359537	FALSE	FALSE
ENSG00000242173	ARHGDIG	HAVANA	gene	10	protein_coding	7.97656	7.23283	0.743727	0.00310689	0.0359675	FALSE	FALSE
ENSG00000103353	UBFD1	HAVANA	gene	16	protein_coding	6.18207	5.50607	0.676	0.00311347	0.0360113	FALSE	FALSE
ENSG00000166479	TMX3	HAVANA	gene	10	protein_coding	6.10138	5.41527	0.686113	0.00311938	0.0360471	FALSE	FALSE
ENSG00000073670	ADAM11	HAVANA	gene	14	protein_coding	3.482	4.41102	-0.929024	0.00314505	0.0363111	FALSE	FALSE
ENSG00000169241	SLC50A1	HAVANA	gene	19	protein_coding	4.57372	3.73704	0.836676	0.00315044	0.0363405	FALSE	FALSE
ENSG00000166407	LMO1	HAVANA	gene	14	protein_coding	2.30337	4.00851	-1.70514	0.00315926	0.0363768	TRUE	FALSE
ENSG00000091039	OSBPL8	HAVANA	gene	17	protein_coding	5.99131	5.43861	0.552708	0.00315866	0.0363768	FALSE	FALSE
ENSG00000114346	ECT2	HAVANA	gene	13	protein_coding	3.91751	3.09472	0.822791	0.00317501	0.0365007	FALSE	FALSE
ENSG00000135324	MRAP2	HAVANA	gene	6	protein_coding	5.66325	4.75944	0.903818	0.00317571	0.0365007	FALSE	FALSE
ENSG00000125703	ATG4C	HAVANA	gene	15	protein_coding	3.90222	4.58731	-0.685092	0.00320466	0.0367879	FALSE	FALSE
ENSG00000135905	DOCK10	HAVANA	gene	19	protein_coding	4.82884	5.41849	-0.589652	0.00320643	0.0367879	FALSE	FALSE
ENSG00000164076	CAMKV	HAVANA	gene	17	protein_coding	6.42917	5.78893	0.640238	0.00321849	0.0368839	FALSE	FALSE
ENSG00000036672	USP2	HAVANA	gene	16	protein_coding	3.9986	4.62664	-0.628036	0.00323065	0.0368839	FALSE	FALSE
ENSG00000166073	GPR176	HAVANA	gene	10	protein_coding	5.75418	5.09937	0.654811	0.00322548	0.0368839	FALSE	FALSE
ENSG00000196547	MAN2A2	HAVANA	gene	15	protein_coding	6.07332	6.60709	-0.533776	0.00322267	0.0368839	FALSE	FALSE
ENSG00000104998	IL27RA	HAVANA	gene	4	protein_coding	1.58537	2.82339	-1.23802	0.00323205	0.0368839	TRUE	FALSE
ENSG00000063180	CA11	HAVANA	gene	9	protein_coding	5.35482	6.02392	-0.669101	0.00322639	0.0368839	FALSE	FALSE
ENSG00000106070	GRB10	HAVANA	gene	19	protein_coding	6.49818	5.85786	0.640316	0.00324156	0.0368881	FALSE	FALSE
ENSG00000186897	C1QL4	HAVANA	gene	5	protein_coding	3.9737	2.86411	1.10958	0.00324392	0.0368881	TRUE	FALSE
ENSG00000139514	SLC7A1	HAVANA	gene	13	protein_coding	6.21469	5.6406	0.574089	0.00324077	0.0368881	FALSE	FALSE
ENSG00000140403	DNAJA4	HAVANA	gene	12	protein_coding	7.89432	7.09859	0.795731	0.0032438	0.0368881	FALSE	FALSE
ENSG00000013619	MAMLD1	HAVANA	gene	14	protein_coding	4.9302	4.09685	0.833359	0.00325571	0.0369893	FALSE	FALSE
ENSG00000251442	LINC01094	HAVANA	gene	6	lncRNA	2.15906	3.85459	-1.69553	0.00326462	0.0370578	TRUE	FALSE
ENSG00000248473	LINC01962	HAVANA	gene	2	lncRNA	3.75018	4.78145	-1.03127	0.00326963	0.0370818	TRUE	FALSE
ENSG00000075651	PLD1	HAVANA	gene	16	protein_coding	2.71723	4.02646	-1.30924	0.00329428	0.0373284	TRUE	FALSE
ENSG00000114933	INO80D	HAVANA	gene	16	protein_coding	2.75441	3.88826	-1.13385	0.00330878	0.0373584	TRUE	FALSE
ENSG00000112367	FIG4	HAVANA	gene	10	protein_coding	5.39593	4.06166	1.33427	0.00331149	0.0373584	TRUE	FALSE
ENSG00000165792	METTL17	HAVANA	gene	17	protein_coding	3.3483	4.09968	-0.751371	0.0033013	0.0373584	FALSE	FALSE
ENSG00000137814	HAUS2	HAVANA	gene	11	protein_coding	4.91122	4.34502	0.566199	0.00330321	0.0373584	FALSE	FALSE
ENSG00000140694	PARN	HAVANA	gene	17	protein_coding	5.74277	5.09974	0.64303	0.00330697	0.0373584	FALSE	FALSE
ENSG00000117305	HMGCL	HAVANA	gene	15	protein_coding	4.26379	4.87186	-0.608075	0.0033323	0.0373733	FALSE	FALSE
ENSG00000126067	PSMB2	HAVANA	gene	12	protein_coding	7.48321	6.88948	0.593731	0.0033189	0.0373733	FALSE	FALSE
ENSG00000116574	RHOU	HAVANA	gene	6	protein_coding	5.27534	6.04455	-0.769207	0.00332844	0.0373733	FALSE	FALSE
ENSG00000283183	AC116565.1	HAVANA	gene	2	lncRNA	3.51513	2.70844	0.806686	0.00334087	0.0373733	FALSE	FALSE
ENSG00000113356	POLR3G	HAVANA	gene	12	protein_coding	4.21358	3.10094	1.11264	0.00333055	0.0373733	TRUE	FALSE
ENSG00000064393	HIPK2	HAVANA	gene	16	protein_coding	7.90511	8.36743	-0.462318	0.00331934	0.0373733	FALSE	FALSE
ENSG00000139292	LGR5	HAVANA	gene	13	protein_coding	4.49	3.61297	0.877029	0.00334194	0.0373733	FALSE	FALSE
ENSG00000088826	SMOX	HAVANA	gene	18	protein_coding	5.33155	5.84342	-0.511868	0.0033386	0.0373733	FALSE	FALSE
ENSG00000177663	IL17RA	HAVANA	gene	13	protein_coding	3.36207	4.28379	-0.92172	0.00333438	0.0373733	FALSE	FALSE
ENSG00000180957	PITPNB	HAVANA	gene	18	protein_coding	6.46813	5.87903	0.589092	0.00332755	0.0373733	FALSE	FALSE
ENSG00000067334	DNTTIP2	HAVANA	gene	14	protein_coding	5.66414	5.13211	0.532032	0.00335079	0.0374395	FALSE	FALSE
ENSG00000071242	RPS6KA2	HAVANA	gene	12	protein_coding	7.13861	6.46814	0.670475	0.00336099	0.0375081	FALSE	FALSE
ENSG00000110011	DNAJC4	HAVANA	gene	13	protein_coding	4.86681	5.51212	-0.645304	0.00336278	0.0375081	FALSE	FALSE
ENSG00000249853	HS3ST5	HAVANA	gene	7	protein_coding	4.50546	3.74672	0.758741	0.00337417	0.0375372	FALSE	FALSE
ENSG00000165355	FBXO33	HAVANA	gene	7	protein_coding	5.82199	5.22851	0.59348	0.00337174	0.0375372	FALSE	FALSE
ENSG00000136490	LIMD2	HAVANA	gene	9	protein_coding	4.15197	3.33984	0.812124	0.00337201	0.0375372	FALSE	FALSE
ENSG00000140090	SLC24A4	HAVANA	gene	17	protein_coding	3.22333	4.07697	-0.853644	0.0033973	0.0377618	FALSE	FALSE
ENSG00000129055	ANAPC13	HAVANA	gene	12	protein_coding	6.85076	6.12579	0.724969	0.00342619	0.0377717	FALSE	FALSE
ENSG00000138231	DBR1	HAVANA	gene	13	protein_coding	2.35541	3.3755	-1.02009	0.00342801	0.0377717	TRUE	FALSE
ENSG00000285051	SLC7A14-AS1	HAVANA	gene	2	lncRNA	2.0677	3.29272	-1.22501	0.00341318	0.0377717	TRUE	FALSE
ENSG00000136271	DDX56	HAVANA	gene	10	protein_coding	5.47192	5.02073	0.451185	0.00341618	0.0377717	FALSE	FALSE
ENSG00000273297	AC009275.1	HAVANA	gene	2	lncRNA	3.02687	2.13588	0.89099	0.00341916	0.0377717	FALSE	FALSE
ENSG00000153317	ASAP1	HAVANA	gene	15	protein_coding	6.22394	5.64664	0.577296	0.00342117	0.0377717	FALSE	FALSE
ENSG00000197119	SLC25A29	HAVANA	gene	13	protein_coding	5.76308	6.30383	-0.540754	0.00342194	0.0377717	FALSE	FALSE
ENSG00000129932	DOHH	HAVANA	gene	9	protein_coding	5.51505	6.00538	-0.490335	0.00340575	0.0377717	FALSE	FALSE
ENSG00000123146	ADGRE5	HAVANA	gene	20	protein_coding	3.00113	3.78083	-0.779702	0.00341197	0.0377717	FALSE	FALSE
ENSG00000181191	PJA1	HAVANA	gene	11	protein_coding	6.6088	6.03193	0.576871	0.0034182	0.0377717	FALSE	FALSE
ENSG00000123570	RAB9B	HAVANA	gene	4	protein_coding	5.68466	4.85177	0.832892	0.00343058	0.0377717	FALSE	FALSE
ENSG00000213190	MLLT11	HAVANA	gene	3	protein_coding	9.08973	8.27529	0.814438	0.0034357	0.0377956	FALSE	FALSE
ENSG00000148408	CACNA1B	HAVANA	gene	13	protein_coding	5.78967	4.99083	0.798842	0.00345253	0.0379157	FALSE	FALSE
ENSG00000149541	B3GAT3	HAVANA	gene	10	protein_coding	6.51288	6.02562	0.487256	0.00344962	0.0379157	FALSE	FALSE
ENSG00000117475	BLZF1	HAVANA	gene	14	protein_coding	4.01486	3.24612	0.768743	0.00348272	0.0382146	FALSE	FALSE
ENSG00000132589	FLOT2	HAVANA	gene	16	protein_coding	7.01463	6.4039	0.610729	0.00349979	0.0383691	FALSE	FALSE
ENSG00000134030	CTIF	HAVANA	gene	14	protein_coding	7.03056	6.53913	0.491433	0.0035062	0.0383917	FALSE	FALSE
ENSG00000101222	SPEF1	HAVANA	gene	12	protein_coding	2.37456	3.45347	-1.07891	0.00350784	0.0383917	TRUE	FALSE
ENSG00000165731	RET	HAVANA	gene	20	protein_coding	5.84138	4.50359	1.33779	0.00353547	0.0386315	TRUE	FALSE
ENSG00000100804	PSMB5	HAVANA	gene	19	protein_coding	7.87186	7.23652	0.635343	0.00353823	0.0386315	FALSE	FALSE
ENSG00000130540	SULT4A1	HAVANA	gene	14	protein_coding	8.09062	7.27635	0.814277	0.00353879	0.0386315	FALSE	FALSE
ENSG00000172260	NEGR1	HAVANA	gene	15	protein_coding	7.31325	6.63885	0.674401	0.00354329	0.0386477	FALSE	FALSE
ENSG00000179454	KLHL28	HAVANA	gene	13	protein_coding	4.60599	4.01212	0.593865	0.00357383	0.0389477	FALSE	FALSE
ENSG00000154864	PIEZO2	HAVANA	gene	12	protein_coding	2.28863	3.74717	-1.45854	0.00358967	0.0390872	TRUE	FALSE
ENSG00000082684	SEMA5B	HAVANA	gene	16	protein_coding	3.33055	2.62008	0.710464	0.00361379	0.0392831	FALSE	FALSE
ENSG00000139722	VPS37B	HAVANA	gene	7	protein_coding	3.54356	4.01625	-0.472692	0.00361371	0.0392831	FALSE	FALSE
ENSG00000267890	AC010624.2	HAVANA	gene	1	lncRNA	4.03065	3.06958	0.961066	0.00363276	0.0394559	FALSE	FALSE
ENSG00000173692	PSMD1	HAVANA	gene	13	protein_coding	7.59138	7.02954	0.561836	0.00364375	0.0395418	FALSE	FALSE
ENSG00000102781	KATNAL1	HAVANA	gene	14	protein_coding	5.5996	4.93195	0.667655	0.00365	0.0395761	FALSE	FALSE
ENSG00000183960	KCNH8	HAVANA	gene	9	protein_coding	2.40438	3.80698	-1.4026	0.00365736	0.0396224	TRUE	FALSE
ENSG00000159792	PSKH1	HAVANA	gene	10	protein_coding	3.63279	4.48846	-0.855675	0.00366082	0.0396265	FALSE	FALSE
ENSG00000072958	AP1M1	HAVANA	gene	8	protein_coding	7.23665	6.7744	0.462243	0.00368691	0.0398752	FALSE	FALSE
ENSG00000157152	SYN2	HAVANA	gene	17	protein_coding	7.89301	7.0687	0.824306	0.00369502	0.0398957	FALSE	FALSE
ENSG00000286755	AC135893.1	HAVANA	gene	1	lncRNA	1.79203	3.05751	-1.26548	0.00369476	0.0398957	TRUE	FALSE
ENSG00000171824	EXOSC10	HAVANA	gene	14	protein_coding	4.55153	5.14701	-0.595487	0.00372059	0.0401042	FALSE	FALSE
ENSG00000011198	ABHD5	HAVANA	gene	10	protein_coding	4.00109	4.76555	-0.764459	0.00371755	0.0401042	FALSE	FALSE
ENSG00000114631	PODXL2	HAVANA	gene	11	protein_coding	8.11746	7.61241	0.50505	0.00372713	0.0401409	FALSE	FALSE
ENSG00000146587	RBAK	HAVANA	gene	18	protein_coding	2.48595	3.61453	-1.12858	0.0037391	0.0402362	TRUE	FALSE
ENSG00000182636	NDN	HAVANA	gene	8	protein_coding	8.14601	7.49887	0.647138	0.00375019	0.0403216	FALSE	FALSE
ENSG00000173898	SPTBN2	HAVANA	gene	13	protein_coding	6.88351	6.25226	0.63125	0.00376632	0.0404611	FALSE	FALSE
ENSG00000144134	RABL2A	HAVANA	gene	18	protein_coding	2.80935	3.64961	-0.840265	0.0037792	0.0405063	FALSE	FALSE
ENSG00000167996	FTH1	HAVANA	gene	16	protein_coding	11.2077	11.6459	-0.438174	0.00377528	0.0405063	FALSE	FALSE
ENSG00000101557	USP14	HAVANA	gene	15	protein_coding	6.86409	6.29576	0.568332	0.00378004	0.0405063	FALSE	FALSE
ENSG00000131263	RLIM	HAVANA	gene	13	protein_coding	6.94741	6.43586	0.511548	0.00378316	0.0405063	FALSE	FALSE
ENSG00000136280	CCM2	HAVANA	gene	16	protein_coding	6.75284	6.26169	0.491148	0.00379026	0.0405485	FALSE	FALSE
ENSG00000143847	PPFIA4	HAVANA	gene	15	protein_coding	5.43238	4.70902	0.72336	0.00379394	0.0405541	FALSE	FALSE
ENSG00000055147	FAM114A2	HAVANA	gene	19	protein_coding	4.11611	3.36481	0.751305	0.00379976	0.0405824	FALSE	FALSE
ENSG00000145907	G3BP1	HAVANA	gene	15	protein_coding	6.29472	5.72498	0.569741	0.00380582	0.0406133	FALSE	FALSE
ENSG00000164031	DNAJB14	HAVANA	gene	17	protein_coding	6.7244	6.22116	0.503244	0.00383603	0.0409017	FALSE	FALSE
ENSG00000257365	FNTB	HAVANA	gene	8	protein_coding	5.17543	5.91706	-0.741626	0.00384964	0.0410127	FALSE	FALSE
ENSG00000119899	SLC17A5	HAVANA	gene	13	protein_coding	5.11277	4.41259	0.700183	0.00385848	0.0410728	FALSE	FALSE
ENSG00000046889	PREX2	HAVANA	gene	19	protein_coding	5.23956	5.95286	-0.713298	0.00386277	0.0410844	FALSE	FALSE
ENSG00000163870	TPRA1	HAVANA	gene	16	protein_coding	5.40012	4.86444	0.53568	0.00387255	0.0411543	FALSE	FALSE
ENSG00000144369	FAM171B	HAVANA	gene	13	protein_coding	7.04427	6.45062	0.593646	0.00387674	0.0411647	FALSE	FALSE
ENSG00000129968	ABHD17A	HAVANA	gene	15	protein_coding	6.60825	7.28749	-0.679234	0.00389906	0.0413675	FALSE	FALSE
ENSG00000069424	KCNAB2	HAVANA	gene	15	protein_coding	7.10838	6.33458	0.773797	0.00392102	0.0415458	FALSE	FALSE
ENSG00000114626	ABTB1	HAVANA	gene	18	protein_coding	4.28762	5.04166	-0.754037	0.00392235	0.0415458	FALSE	FALSE
ENSG00000085719	CPNE3	HAVANA	gene	13	protein_coding	6.24416	5.7922	0.451959	0.00393302	0.0415902	FALSE	FALSE
ENSG00000122026	RPL21	HAVANA	gene	10	protein_coding	9.6465	10.0837	-0.437253	0.00393214	0.0415902	FALSE	FALSE
ENSG00000165271	NOL6	HAVANA	gene	17	protein_coding	4.82172	4.28437	0.537355	0.00394412	0.0416731	FALSE	FALSE
ENSG00000139324	TMTC3	HAVANA	gene	12	protein_coding	5.09787	4.16484	0.933026	0.00394926	0.0416931	FALSE	FALSE
ENSG00000159176	CSRP1	HAVANA	gene	14	protein_coding	8.45858	8.93961	-0.481028	0.00395385	0.0417073	FALSE	FALSE
ENSG00000187764	SEMA4D	HAVANA	gene	11	protein_coding	7.01272	7.58038	-0.567659	0.00395961	0.0417337	FALSE	FALSE
ENSG00000135655	USP15	HAVANA	gene	16	protein_coding	4.95113	4.18348	0.767652	0.00396321	0.0417374	FALSE	FALSE
ENSG00000162434	JAK1	HAVANA	gene	13	protein_coding	6.66517	6.11786	0.547314	0.00400279	0.0421196	FALSE	FALSE
ENSG00000112562	SMOC2	HAVANA	gene	18	protein_coding	2.26441	3.49299	-1.22858	0.00401323	0.0421948	TRUE	FALSE
ENSG00000138795	LEF1	HAVANA	gene	10	protein_coding	2.40324	3.43962	-1.03638	0.00402264	0.0422592	TRUE	FALSE
ENSG00000180155	LYNX1	HAVANA	gene	20	protein_coding	7.83926	7.22035	0.618909	0.00402911	0.0422924	FALSE	FALSE
ENSG00000170571	EMB	HAVANA	gene	12	protein_coding	4.53944	3.36092	1.17852	0.00403254	0.0422938	TRUE	FALSE
ENSG00000161791	FMNL3	HAVANA	gene	14	protein_coding	2.72761	4.22578	-1.49817	0.00404193	0.0423577	TRUE	FALSE
ENSG00000178802	MPI	HAVANA	gene	18	protein_coding	6.42516	5.8793	0.545859	0.00405027	0.0424105	FALSE	FALSE
ENSG00000104218	CSPP1	HAVANA	gene	14	protein_coding	3.17593	4.45764	-1.28171	0.00406487	0.0424593	TRUE	FALSE
ENSG00000170677	SOCS6	HAVANA	gene	6	protein_coding	3.74107	4.34254	-0.601466	0.00406124	0.0424593	FALSE	FALSE
ENSG00000167747	C19orf48	HAVANA	gene	14	protein_coding	3.64792	4.31035	-0.662424	0.00406205	0.0424593	FALSE	FALSE
ENSG00000171533	MAP6	HAVANA	gene	11	protein_coding	7.38481	6.7793	0.605514	0.00407778	0.0425595	FALSE	FALSE
ENSG00000140092	FBLN5	HAVANA	gene	14	protein_coding	2.90361	3.67134	-0.767729	0.00408716	0.0425946	FALSE	FALSE
ENSG00000105255	FSD1	HAVANA	gene	11	protein_coding	6.10239	5.44733	0.655059	0.00408778	0.0425946	FALSE	FALSE
ENSG00000164933	SLC25A32	HAVANA	gene	12	protein_coding	5.53301	4.76324	0.769769	0.00411682	0.0428623	FALSE	FALSE
ENSG00000164949	GEM	HAVANA	gene	8	protein_coding	3.28613	2.03728	1.24884	0.00412334	0.0428955	TRUE	FALSE
ENSG00000150347	ARID5B	HAVANA	gene	16	protein_coding	3.66026	4.50925	-0.848981	0.00412732	0.042902	FALSE	FALSE
ENSG00000164008	C1orf50	HAVANA	gene	16	protein_coding	4.89278	4.19077	0.702015	0.00413092	0.0429047	FALSE	FALSE
ENSG00000134255	CEPT1	HAVANA	gene	14	protein_coding	5.21721	4.65777	0.559443	0.00413516	0.042914	FALSE	FALSE
ENSG00000260260	SNHG19	HAVANA	gene	1	lncRNA	4.5559	5.44258	-0.886681	0.00413994	0.0429289	FALSE	FALSE
ENSG00000161904	LEMD2	HAVANA	gene	12	protein_coding	4.48867	5.17327	-0.684604	0.00415233	0.0430226	FALSE	FALSE
ENSG00000145979	TBC1D7	HAVANA	gene	18	protein_coding	4.41138	3.73092	0.680462	0.0041601	0.0430683	FALSE	FALSE
ENSG00000139637	C12orf10	HAVANA	gene	14	protein_coding	6.81987	6.16123	0.658645	0.00416491	0.0430833	FALSE	FALSE
ENSG00000196961	AP2A1	HAVANA	gene	12	protein_coding	6.78628	6.1661	0.620178	0.00417014	0.0431026	FALSE	FALSE
ENSG00000157500	APPL1	HAVANA	gene	12	protein_coding	5.9456	5.45632	0.489278	0.00418864	0.0432148	FALSE	FALSE
ENSG00000180537	RNF182	HAVANA	gene	13	protein_coding	5.05149	4.39675	0.654738	0.0041911	0.0432148	FALSE	FALSE
ENSG00000090054	SPTLC1	HAVANA	gene	15	protein_coding	5.91588	5.3596	0.55628	0.0041897	0.0432148	FALSE	FALSE
ENSG00000115129	TP53I3	HAVANA	gene	14	protein_coding	3.26498	2.36283	0.902149	0.00419676	0.0432384	FALSE	FALSE
ENSG00000089847	ANKRD24	HAVANA	gene	12	protein_coding	2.20671	3.46595	-1.25924	0.00420514	0.04329	TRUE	FALSE
ENSG00000005700	IBTK	HAVANA	gene	15	protein_coding	4.66931	5.25513	-0.585816	0.00424018	0.0435808	FALSE	FALSE
ENSG00000103485	QPRT	HAVANA	gene	19	protein_coding	6.01851	5.27628	0.742226	0.00423955	0.0435808	FALSE	FALSE
ENSG00000160991	ORAI2	HAVANA	gene	16	protein_coding	6.60457	5.9655	0.639063	0.00425865	0.0437356	FALSE	FALSE
ENSG00000065609	SNAP91	HAVANA	gene	14	protein_coding	7.9719	7.27502	0.696875	0.00426341	0.0437494	FALSE	FALSE
ENSG00000096093	EFHC1	HAVANA	gene	16	protein_coding	3.4801	4.17639	-0.696286	0.00427224	0.04377	FALSE	FALSE
ENSG00000101574	METTL4	HAVANA	gene	15	protein_coding	2.85335	3.44996	-0.596616	0.00427195	0.04377	FALSE	FALSE
ENSG00000115556	PLCD4	HAVANA	gene	14	protein_coding	2.98973	2.0067	0.983034	0.00427917	0.043806	FALSE	FALSE
ENSG00000139163	ETNK1	HAVANA	gene	16	protein_coding	7.02259	6.34609	0.676508	0.00429337	0.0439163	FALSE	FALSE
ENSG00000092871	RFFL	HAVANA	gene	16	protein_coding	5.15464	5.63293	-0.478292	0.00430984	0.0440496	FALSE	FALSE
ENSG00000260807	AC009041.2	HAVANA	gene	7	lncRNA	5.01347	5.87238	-0.858916	0.00431945	0.0441127	FALSE	FALSE
ENSG00000112406	HECA	HAVANA	gene	5	protein_coding	5.27393	4.59334	0.68059	0.00433391	0.0442252	FALSE	FALSE
ENSG00000161970	RPL26	HAVANA	gene	15	protein_coding	8.707	9.31207	-0.605069	0.00434084	0.0442607	FALSE	FALSE
ENSG00000106976	DNM1	HAVANA	gene	20	protein_coding	9.18821	8.48257	0.705638	0.00435127	0.0443024	FALSE	FALSE
ENSG00000079337	RAPGEF3	HAVANA	gene	16	protein_coding	4.65377	5.20466	-0.550892	0.0043521	0.0443024	FALSE	FALSE
ENSG00000140157	NIPA2	HAVANA	gene	14	protein_coding	5.78995	5.11036	0.679585	0.00435529	0.0443024	FALSE	FALSE
ENSG00000164050	PLXNB1	HAVANA	gene	13	protein_coding	6.77955	7.31059	-0.531045	0.00436275	0.0443431	FALSE	FALSE
ENSG00000020181	ADGRA2	HAVANA	gene	18	protein_coding	2.38608	3.43483	-1.04875	0.0043697	0.0443786	TRUE	FALSE
ENSG00000235034	C19orf81	HAVANA	gene	7	protein_coding	2.78254	3.60879	-0.826241	0.00440024	0.0446534	FALSE	FALSE
ENSG00000152154	TMEM178A	HAVANA	gene	11	protein_coding	6.59302	5.93067	0.662355	0.00441425	0.0447601	FALSE	FALSE
ENSG00000110092	CCND1	HAVANA	gene	3	protein_coding	4.14447	4.95491	-0.810441	0.00442655	0.0448494	FALSE	FALSE
ENSG00000100902	PSMA6	HAVANA	gene	11	protein_coding	7.14512	6.63744	0.507678	0.0044436	0.0449866	FALSE	FALSE
ENSG00000136247	ZDHHC4	HAVANA	gene	14	protein_coding	5.92045	5.3564	0.564049	0.00446131	0.0451224	FALSE	FALSE
ENSG00000166965	RCCD1	HAVANA	gene	12	protein_coding	4.2782	3.21763	1.06057	0.00446405	0.0451224	TRUE	FALSE
ENSG00000177807	KCNJ10	HAVANA	gene	10	protein_coding	6.79026	7.34529	-0.555023	0.00447989	0.0452469	FALSE	FALSE
ENSG00000164970	FAM219A	HAVANA	gene	15	protein_coding	7.01683	6.38335	0.633479	0.00449012	0.0453146	FALSE	FALSE
ENSG00000115993	TRAK2	HAVANA	gene	13	protein_coding	6.28543	6.71293	-0.4275	0.00451346	0.0454428	FALSE	FALSE
ENSG00000235652	AL356599.1	HAVANA	gene	8	lncRNA	2.84432	3.7449	-0.900585	0.00451168	0.0454428	FALSE	FALSE
ENSG00000169933	FRMPD4	HAVANA	gene	15	protein_coding	4.31787	3.5692	0.748678	0.00450816	0.0454428	FALSE	FALSE
ENSG00000117298	ECE1	HAVANA	gene	16	protein_coding	4.24119	4.92053	-0.679333	0.00453392	0.0454673	FALSE	FALSE
ENSG00000116704	SLC35D1	HAVANA	gene	8	protein_coding	2.50094	3.56717	-1.06623	0.00453899	0.0454673	TRUE	FALSE
ENSG00000197386	HTT	HAVANA	gene	12	protein_coding	5.71398	5.09437	0.619608	0.00454187	0.0454673	FALSE	FALSE
ENSG00000228408	AL031056.1	HAVANA	gene	6	lncRNA	1.51457	3.1259	-1.61134	0.00453042	0.0454673	TRUE	FALSE
ENSG00000112541	PDE10A	HAVANA	gene	15	protein_coding	2.30695	3.59005	-1.2831	0.00452461	0.0454673	TRUE	FALSE
ENSG00000079459	FDFT1	HAVANA	gene	13	protein_coding	8.05587	7.48433	0.571537	0.00453338	0.0454673	FALSE	FALSE
ENSG00000167123	CERCAM	HAVANA	gene	19	protein_coding	5.76785	6.46974	-0.701892	0.00454425	0.0454673	FALSE	FALSE
ENSG00000023734	STRAP	HAVANA	gene	11	protein_coding	7.77548	7.12532	0.650153	0.00453861	0.0454673	FALSE	FALSE
ENSG00000178385	PLEKHM3	HAVANA	gene	15	protein_coding	5.27956	4.50225	0.777311	0.00455329	0.0455223	FALSE	FALSE
ENSG00000133422	MORC2	HAVANA	gene	13	protein_coding	4.31967	3.78655	0.533118	0.00456846	0.0456384	FALSE	FALSE
ENSG00000164188	RANBP3L	HAVANA	gene	8	protein_coding	1.5157	2.84104	-1.32534	0.00458689	0.0456931	TRUE	FALSE
ENSG00000184349	EFNA5	HAVANA	gene	13	protein_coding	4.21209	3.46411	0.747974	0.0045925	0.0456931	FALSE	FALSE
ENSG00000113327	GABRG2	HAVANA	gene	16	protein_coding	7.94206	7.16276	0.779302	0.00459531	0.0456931	FALSE	FALSE
ENSG00000233452	STXBP5-AS1	HAVANA	gene	7	lncRNA	2.34142	3.29331	-0.951891	0.00458725	0.0456931	FALSE	FALSE
ENSG00000204442	FAM155A	HAVANA	gene	4	protein_coding	6.17055	5.52468	0.645865	0.00458922	0.0456931	FALSE	FALSE
ENSG00000267532	MIR497HG	HAVANA	gene	5	lncRNA	2.03707	3.32561	-1.28854	0.00458716	0.0456931	TRUE	FALSE
ENSG00000129194	SOX15	HAVANA	gene	8	protein_coding	3.49571	4.36799	-0.872273	0.0046022	0.0457261	FALSE	FALSE
ENSG00000048540	LMO3	HAVANA	gene	15	protein_coding	6.65305	6.09007	0.562989	0.00461696	0.0458371	FALSE	FALSE
ENSG00000151320	AKAP6	HAVANA	gene	11	protein_coding	7.33536	6.8468	0.488559	0.00462051	0.0458371	FALSE	FALSE
ENSG00000129219	PLD2	HAVANA	gene	14	protein_coding	3.64665	4.32658	-0.679936	0.00462505	0.0458466	FALSE	FALSE
ENSG00000165233	CARD19	HAVANA	gene	18	protein_coding	5.74107	5.15318	0.587898	0.00463598	0.0459083	FALSE	FALSE
ENSG00000119684	MLH3	HAVANA	gene	15	protein_coding	3.42512	4.21145	-0.786337	0.00463843	0.0459083	FALSE	FALSE
ENSG00000260412	AL353746.1	HAVANA	gene	1	lncRNA	1.32693	2.56795	-1.24102	0.00464317	0.0459197	TRUE	FALSE
ENSG00000233396	LINC01719	HAVANA	gene	8	lncRNA	1.87143	2.89934	-1.02791	0.00466031	0.0460538	TRUE	FALSE
ENSG00000165194	PCDH19	HAVANA	gene	15	protein_coding	5.52655	4.91828	0.608267	0.00467422	0.0461557	FALSE	FALSE
ENSG00000027001	MIPEP	HAVANA	gene	10	protein_coding	1.76167	3.06249	-1.30082	0.00469892	0.0463639	TRUE	FALSE
ENSG00000072401	UBE2D1	HAVANA	gene	15	protein_coding	5.64137	4.93802	0.703342	0.00470706	0.0464085	FALSE	FALSE
ENSG00000138400	MDH1B	HAVANA	gene	13	protein_coding	2.53567	3.63934	-1.10367	0.0047257	0.0465565	TRUE	FALSE
ENSG00000151348	EXT2	HAVANA	gene	14	protein_coding	5.52677	4.99392	0.532847	0.00474595	0.0467201	FALSE	FALSE
ENSG00000135679	MDM2	HAVANA	gene	25	protein_coding	5.21812	5.65616	-0.438044	0.004757	0.046793	FALSE	FALSE
ENSG00000166311	SMPD1	HAVANA	gene	10	protein_coding	6.39755	5.9747	0.422853	0.00476583	0.046844	FALSE	FALSE
ENSG00000120088	CRHR1	HAVANA	gene	14	protein_coding	3.25709	2.40901	0.848077	0.00477203	0.0468689	FALSE	FALSE
ENSG00000198836	OPA1	HAVANA	gene	10	protein_coding	7.04184	6.26316	0.778679	0.00478614	0.0469357	FALSE	FALSE
ENSG00000266714	MYO15B	HAVANA	gene	9	protein_coding	3.06326	4.24953	-1.18627	0.00478352	0.0469357	TRUE	FALSE
ENSG00000106538	RARRES2	HAVANA	gene	10	protein_coding	4.68839	5.50012	-0.811731	0.00479288	0.0469658	FALSE	FALSE
ENSG00000164818	DNAAF5	HAVANA	gene	16	protein_coding	2.67629	3.89241	-1.21613	0.00481647	0.047161	TRUE	FALSE
ENSG00000131711	MAP1B	HAVANA	gene	15	protein_coding	11.3375	10.6775	0.660016	0.00483993	0.0473546	FALSE	FALSE
ENSG00000126934	MAP2K2	HAVANA	gene	13	protein_coding	7.92104	7.41359	0.507456	0.00484915	0.0474086	FALSE	FALSE
ENSG00000070010	UFD1	HAVANA	gene	19	protein_coding	5.98217	5.47525	0.506925	0.00487892	0.0476633	FALSE	FALSE
ENSG00000010270	STARD3NL	HAVANA	gene	13	protein_coding	6.90169	6.28243	0.619264	0.00488852	0.0477139	FALSE	FALSE
ENSG00000151572	ANO4	HAVANA	gene	18	protein_coding	4.10504	3.29297	0.812062	0.00489526	0.0477139	FALSE	FALSE
ENSG00000101019	UQCC1	HAVANA	gene	22	protein_coding	6.19747	5.50248	0.694995	0.00489398	0.0477139	FALSE	FALSE
ENSG00000272702	AC010913.1	HAVANA	gene	1	lncRNA	3.03051	3.87757	-0.847053	0.00490061	0.0477298	FALSE	FALSE
ENSG00000136098	NEK3	HAVANA	gene	17	protein_coding	2.04355	3.16741	-1.12386	0.00490755	0.0477612	TRUE	FALSE
ENSG00000070018	LRP6	HAVANA	gene	9	protein_coding	3.98096	4.68183	-0.700864	0.00492562	0.0479006	FALSE	FALSE
ENSG00000138101	DTNB	HAVANA	gene	18	protein_coding	5.45453	5.95487	-0.500341	0.00494464	0.047904	FALSE	FALSE
ENSG00000176788	BASP1	HAVANA	gene	9	protein_coding	9.47161	8.84	0.631615	0.00493945	0.047904	FALSE	FALSE
ENSG00000113758	DBN1	HAVANA	gene	13	protein_coding	5.8395	5.31539	0.524105	0.00494084	0.047904	FALSE	FALSE
ENSG00000090661	CERS4	HAVANA	gene	12	protein_coding	4.65185	5.15426	-0.502405	0.00494435	0.047904	FALSE	FALSE
ENSG00000101444	AHCY	HAVANA	gene	13	protein_coding	6.04598	5.61534	0.430646	0.00493926	0.047904	FALSE	FALSE
ENSG00000168005	SPINDOC	HAVANA	gene	9	protein_coding	4.58139	3.91223	0.669161	0.00495664	0.0479553	FALSE	FALSE
ENSG00000068650	ATP11A	HAVANA	gene	18	protein_coding	4.05375	4.83458	-0.780832	0.00495741	0.0479553	FALSE	FALSE
ENSG00000225140	AL358216.1	HAVANA	gene	1	lncRNA	2.03894	3.45546	-1.41652	0.00497237	0.0480427	TRUE	FALSE
ENSG00000101363	MANBAL	HAVANA	gene	12	protein_coding	6.7993	6.29991	0.49939	0.00497393	0.0480427	FALSE	FALSE
ENSG00000189127	ANKRD34B	HAVANA	gene	8	protein_coding	1.79489	3.37058	-1.57569	0.00497979	0.0480509	TRUE	FALSE
ENSG00000198176	TFDP1	HAVANA	gene	13	protein_coding	4.66442	5.26045	-0.59603	0.00498228	0.0480509	FALSE	FALSE
ENSG00000066248	NGEF	HAVANA	gene	15	protein_coding	2.85303	4.0592	-1.20617	0.00499284	0.0480804	TRUE	FALSE
ENSG00000155966	AFF2	HAVANA	gene	14	protein_coding	4.94625	4.33122	0.61503	0.00499187	0.0480804	FALSE	FALSE
ENSG00000014919	COX15	HAVANA	gene	12	protein_coding	5.29485	4.79911	0.49574	0.00500196	0.0481322	FALSE	FALSE
ENSG00000134748	PRPF38A	HAVANA	gene	13	protein_coding	4.36694	5.00214	-0.635198	0.0050161	0.0481574	FALSE	FALSE
ENSG00000143179	UCK2	HAVANA	gene	16	protein_coding	4.98808	4.16859	0.819488	0.00501884	0.0481574	FALSE	FALSE
ENSG00000153786	ZDHHC7	HAVANA	gene	12	protein_coding	5.12168	4.56308	0.558596	0.00501954	0.0481574	FALSE	FALSE
ENSG00000130520	LSM4	HAVANA	gene	10	protein_coding	7.43559	6.92259	0.513001	0.0050196	0.0481574	FALSE	FALSE
ENSG00000198797	BRINP2	HAVANA	gene	7	protein_coding	3.9835	4.5493	-0.565799	0.00505321	0.0483789	FALSE	FALSE
ENSG00000175274	TP53I11	HAVANA	gene	18	protein_coding	5.91759	5.43559	0.481999	0.005054	0.0483789	FALSE	FALSE
ENSG00000167772	ANGPTL4	HAVANA	gene	12	protein_coding	3.96023	4.86309	-0.902862	0.00504798	0.0483789	FALSE	FALSE
ENSG00000134243	SORT1	HAVANA	gene	12	protein_coding	7.23598	7.74772	-0.511742	0.0050639	0.0484374	FALSE	FALSE
ENSG00000125814	NAPB	HAVANA	gene	17	protein_coding	9.20147	8.50269	0.698781	0.00507606	0.0484814	FALSE	FALSE
ENSG00000100983	GSS	HAVANA	gene	12	protein_coding	5.5342	4.77883	0.755375	0.00507469	0.0484814	FALSE	FALSE
ENSG00000151229	SLC2A13	HAVANA	gene	13	protein_coding	6.43645	5.63839	0.798062	0.00508697	0.0485495	FALSE	FALSE
ENSG00000106799	TGFBR1	HAVANA	gene	13	protein_coding	5.27485	4.65351	0.621337	0.00509938	0.0486317	FALSE	FALSE
ENSG00000249115	HAUS5	HAVANA	gene	9	protein_coding	1.60789	2.81747	-1.20958	0.00513608	0.0489454	TRUE	FALSE
ENSG00000119812	FAM98A	HAVANA	gene	19	protein_coding	5.78545	5.22598	0.559475	0.00515104	0.0490515	FALSE	FALSE
ENSG00000171540	OTP	HAVANA	gene	7	protein_coding	1.99407	3.93108	-1.93702	0.00516152	0.0490784	TRUE	FALSE
ENSG00000166816	LDHD	HAVANA	gene	14	protein_coding	5.17533	4.57645	0.59888	0.00516036	0.0490784	FALSE	FALSE
ENSG00000180354	MTURN	HAVANA	gene	16	protein_coding	9.33889	9.82423	-0.485339	0.0051736	0.0491262	FALSE	FALSE
ENSG00000255717	SNHG1	HAVANA	gene	7	lncRNA	3.89036	4.53255	-0.64219	0.00517803	0.0491262	FALSE	FALSE
ENSG00000159202	UBE2Z	HAVANA	gene	18	protein_coding	7.28673	6.78382	0.502905	0.00517562	0.0491262	FALSE	FALSE
ENSG00000166750	SLFN5	HAVANA	gene	10	protein_coding	2.25768	3.14112	-0.883436	0.00522389	0.0495209	FALSE	FALSE
ENSG00000080845	DLGAP4	HAVANA	gene	17	protein_coding	6.17504	5.76479	0.410253	0.00522735	0.0495209	FALSE	FALSE
ENSG00000198420	TCAF1	HAVANA	gene	10	protein_coding	6.84067	6.15934	0.681329	0.00523283	0.0495361	FALSE	FALSE
ENSG00000264364	DYNLL2	HAVANA	gene	3	protein_coding	9.63416	9.09104	0.543122	0.00524964	0.0496587	FALSE	FALSE
ENSG00000197430	OPALIN	HAVANA	gene	11	protein_coding	5.13593	6.16773	-1.0318	0.00526004	0.0497204	TRUE	FALSE
ENSG00000172354	GNB2	HAVANA	gene	10	protein_coding	7.36864	6.92486	0.443779	0.00526717	0.0497511	FALSE	FALSE
ENSG00000185100	ADSSL1	HAVANA	gene	10	protein_coding	2.90879	3.71101	-0.80222	0.00528261	0.0498235	FALSE	FALSE
ENSG00000042753	AP2S1	HAVANA	gene	11	protein_coding	7.97991	7.41821	0.5617	0.00528113	0.0498235	FALSE	FALSE
ENSG00000165916	PSMC3	HAVANA	gene	8	protein_coding	7.55983	7.13244	0.427393	0.00530197	0.0499694	FALSE	FALSE
ENSG00000101412	E2F1	HAVANA	gene	13	protein_coding	3.28213	2.60938	0.672752	0.00531655	0.0500701	FALSE	FALSE
ENSG00000106404	CLDN15	HAVANA	gene	13	protein_coding	1.73051	2.96118	-1.23067	0.00533477	0.0502047	FALSE	FALSE
ENSG00000011523	CEP68	HAVANA	gene	14	protein_coding	5.25521	4.70379	0.551421	0.00534898	0.0503016	FALSE	FALSE
ENSG00000166197	NOLC1	HAVANA	gene	16	protein_coding	6.20143	5.62739	0.574037	0.00536318	0.0503982	FALSE	FALSE
ENSG00000176749	CDK5R1	HAVANA	gene	9	protein_coding	6.57814	6.00045	0.577691	0.00538183	0.0505365	FALSE	FALSE
ENSG00000137845	ADAM10	HAVANA	gene	15	protein_coding	5.35377	5.83673	-0.482958	0.00539125	0.0505717	FALSE	FALSE
ENSG00000160179	ABCG1	HAVANA	gene	18	protein_coding	3.31804	3.96243	-0.644395	0.00539348	0.0505717	FALSE	FALSE
ENSG00000122694	GLIPR2	HAVANA	gene	16	protein_coding	4.11777	4.73508	-0.617313	0.00540516	0.0506355	FALSE	FALSE
ENSG00000214575	CPEB1	HAVANA	gene	9	protein_coding	6.73017	6.08901	0.641152	0.00540818	0.0506355	FALSE	FALSE
ENSG00000166387	PPFIBP2	HAVANA	gene	13	protein_coding	2.60724	3.46299	-0.855751	0.00541612	0.0506729	FALSE	FALSE
ENSG00000146433	TMEM181	HAVANA	gene	8	protein_coding	6.16449	5.71106	0.453434	0.00543289	0.0507928	FALSE	FALSE
ENSG00000136546	SCN7A	HAVANA	gene	16	protein_coding	4.97307	4.28345	0.689625	0.00545042	0.0508085	FALSE	FALSE
ENSG00000187672	ERC2	HAVANA	gene	13	protein_coding	5.78808	5.10277	0.685314	0.00544766	0.0508085	FALSE	FALSE
ENSG00000273238	TMEM271	HAVANA	gene	2	protein_coding	5.45231	4.82257	0.629739	0.00544974	0.0508085	FALSE	FALSE
ENSG00000156482	RPL30	HAVANA	gene	11	protein_coding	9.10128	9.5503	-0.449015	0.00544032	0.0508085	FALSE	FALSE
ENSG00000223572	CKMT1A	HAVANA	gene	9	protein_coding	6.51917	5.59517	0.923999	0.0054566	0.0508292	FALSE	FALSE
ENSG00000026025	VIM	HAVANA	gene	16	protein_coding	5.86539	6.53341	-0.668025	0.00546171	0.0508398	FALSE	FALSE
ENSG00000109680	TBC1D19	HAVANA	gene	11	protein_coding	4.02004	3.18502	0.835024	0.00553251	0.0514254	FALSE	FALSE
ENSG00000185386	MAPK11	HAVANA	gene	15	protein_coding	4.97212	4.01195	0.960173	0.00553263	0.0514254	FALSE	FALSE
ENSG00000166924	NYAP1	HAVANA	gene	9	protein_coding	5.13323	4.41609	0.717139	0.00553934	0.0514504	FALSE	FALSE
ENSG00000133392	MYH11	HAVANA	gene	18	protein_coding	1.89143	3.43894	-1.54751	0.00554747	0.0514887	FALSE	FALSE
ENSG00000004777	ARHGAP33	HAVANA	gene	18	protein_coding	4.04246	4.65871	-0.616249	0.00556619	0.0516251	FALSE	FALSE
ENSG00000177425	PAWR	HAVANA	gene	11	protein_coding	4.58472	3.86418	0.720541	0.00558996	0.0518081	FALSE	FALSE
ENSG00000011105	TSPAN9	HAVANA	gene	14	protein_coding	4.25327	3.44446	0.808814	0.00561021	0.0519583	FALSE	FALSE
ENSG00000085433	WDR47	HAVANA	gene	15	protein_coding	6.7147	6.1552	0.559501	0.00563642	0.0520132	FALSE	FALSE
ENSG00000115459	ELMOD3	HAVANA	gene	18	protein_coding	2.63212	3.762	-1.12988	0.00562767	0.0520132	FALSE	FALSE
ENSG00000175229	GAL3ST3	HAVANA	gene	7	protein_coding	2.13667	3.42119	-1.28453	0.00563604	0.0520132	FALSE	FALSE
ENSG00000158470	B4GALT5	HAVANA	gene	5	protein_coding	6.37599	5.87969	0.496299	0.00562851	0.0520132	FALSE	FALSE
ENSG00000225110	PNMA6F	HAVANA	gene	3	protein_coding	6.01808	5.28249	0.735596	0.00563331	0.0520132	FALSE	FALSE
ENSG00000143321	HDGF	HAVANA	gene	19	protein_coding	5.54085	6.04765	-0.506803	0.00565596	0.0521393	FALSE	FALSE
ENSG00000158806	NPM2	HAVANA	gene	14	protein_coding	5.55297	4.84072	0.712253	0.00565821	0.0521393	FALSE	FALSE
ENSG00000109184	DCUN1D4	HAVANA	gene	15	protein_coding	7.10214	6.46087	0.641268	0.00568163	0.05228	FALSE	FALSE
ENSG00000109062	SLC9A3R1	HAVANA	gene	12	protein_coding	6.20732	6.62954	-0.422215	0.00567822	0.05228	FALSE	FALSE
ENSG00000136813	ECPAS	HAVANA	gene	14	protein_coding	6.29721	5.66775	0.629456	0.00569558	0.0523029	FALSE	FALSE
ENSG00000101986	ABCD1	HAVANA	gene	12	protein_coding	3.87066	2.52804	1.34262	0.00569635	0.0523029	FALSE	FALSE
ENSG00000278817	AC007325.4	ENSEMBL	gene	1	protein_coding	5.65203	5.06483	0.587196	0.00569155	0.0523029	FALSE	FALSE
ENSG00000157219	HTR5A	HAVANA	gene	5	protein_coding	5.21387	4.32643	0.887447	0.00570748	0.0523676	FALSE	FALSE
ENSG00000179403	VWA1	HAVANA	gene	12	protein_coding	5.5233	6.1946	-0.671304	0.00576071	0.0524325	FALSE	FALSE
ENSG00000083444	PLOD1	HAVANA	gene	17	protein_coding	5.47247	5.02852	0.443955	0.00576274	0.0524325	FALSE	FALSE
ENSG00000164300	SERINC5	HAVANA	gene	17	protein_coding	3.98438	5.37908	-1.3947	0.00575369	0.0524325	FALSE	FALSE
ENSG00000164402	SEPTIN8	HAVANA	gene	14	protein_coding	7.75552	8.18021	-0.424694	0.00574302	0.0524325	FALSE	FALSE
ENSG00000270021	AC026691.1	HAVANA	gene	1	lncRNA	2.29976	3.04729	-0.747533	0.00572945	0.0524325	FALSE	FALSE
ENSG00000173715	C11orf80	HAVANA	gene	16	protein_coding	3.16985	2.28836	0.881487	0.00576075	0.0524325	FALSE	FALSE
ENSG00000006534	ALDH3B1	HAVANA	gene	16	protein_coding	2.03235	3.03983	-1.00747	0.00575486	0.0524325	FALSE	FALSE
ENSG00000150768	DLAT	HAVANA	gene	15	protein_coding	6.38392	5.71464	0.66928	0.00574337	0.0524325	FALSE	FALSE
ENSG00000139687	RB1	HAVANA	gene	15	protein_coding	5.31628	4.83152	0.484759	0.00576361	0.0524325	FALSE	FALSE
ENSG00000088451	TGDS	HAVANA	gene	11	protein_coding	1.42872	2.71175	-1.28303	0.00573441	0.0524325	FALSE	FALSE
ENSG00000170537	TMC7	HAVANA	gene	13	protein_coding	2.60208	3.58311	-0.981026	0.00574833	0.0524325	FALSE	FALSE
ENSG00000175931	UBE2O	HAVANA	gene	13	protein_coding	5.85312	5.2582	0.594928	0.00575271	0.0524325	FALSE	FALSE
ENSG00000138686	BBS7	HAVANA	gene	10	protein_coding	5.51006	4.71398	0.796082	0.00577932	0.0525382	FALSE	FALSE
ENSG00000165633	VSTM4	HAVANA	gene	13	protein_coding	3.59374	4.30759	-0.713847	0.0057868	0.0525689	FALSE	FALSE
ENSG00000163041	H3F3A	HAVANA	gene	11	protein_coding	7.58962	8.06543	-0.475817	0.0058112	0.0527532	FALSE	FALSE
ENSG00000151322	NPAS3	HAVANA	gene	18	protein_coding	4.93319	5.46498	-0.531788	0.00582643	0.0528541	FALSE	FALSE
ENSG00000136451	VEZF1	HAVANA	gene	9	protein_coding	4.65146	5.16945	-0.517989	0.0058364	0.052907	FALSE	FALSE
ENSG00000164161	HHIP	HAVANA	gene	10	protein_coding	4.65646	5.31403	-0.657561	0.00585373	0.0529163	FALSE	FALSE
ENSG00000186468	RPS23	HAVANA	gene	13	protein_coding	9.33634	9.82091	-0.484567	0.00586255	0.0529163	FALSE	FALSE
ENSG00000180190	TDRP	HAVANA	gene	11	protein_coding	5.16609	4.71353	0.452562	0.00585772	0.0529163	FALSE	FALSE
ENSG00000275342	PRAG1	HAVANA	gene	5	protein_coding	3.53729	3.03396	0.503335	0.00586562	0.0529163	FALSE	FALSE
ENSG00000120992	LYPLA1	HAVANA	gene	18	protein_coding	5.48453	4.91522	0.569309	0.00585908	0.0529163	FALSE	FALSE
ENSG00000088832	FKBP1A	HAVANA	gene	17	protein_coding	7.09655	6.61413	0.482422	0.0058663	0.0529163	FALSE	FALSE
ENSG00000125871	MGME1	HAVANA	gene	14	protein_coding	3.13882	2.31856	0.820262	0.00584241	0.0529163	FALSE	FALSE
ENSG00000204576	PRR3	HAVANA	gene	11	protein_coding	3.9976	3.39595	0.601649	0.00589041	0.053022	FALSE	FALSE
ENSG00000102007	PLP2	HAVANA	gene	11	protein_coding	2.02762	3.09793	-1.07031	0.00588848	0.053022	FALSE	FALSE
ENSG00000256045	MTRNR2L10	HAVANA	gene	3	protein_coding	7.99469	8.43135	-0.436659	0.00588426	0.053022	FALSE	FALSE
ENSG00000165566	AMER2	HAVANA	gene	12	protein_coding	6.22637	6.75454	-0.528173	0.00589753	0.0530488	FALSE	FALSE
ENSG00000164924	YWHAZ	HAVANA	gene	18	protein_coding	9.70497	9.05629	0.648673	0.00591431	0.0531625	FALSE	FALSE
ENSG00000127824	TUBA4A	HAVANA	gene	14	protein_coding	8.55811	7.69776	0.860345	0.00592022	0.0531783	FALSE	FALSE
ENSG00000116954	RRAGC	HAVANA	gene	8	protein_coding	6.34549	5.82217	0.523318	0.00593401	0.0532649	FALSE	FALSE
ENSG00000080815	PSEN1	HAVANA	gene	19	protein_coding	5.77731	6.28913	-0.511824	0.00594447	0.0533215	FALSE	FALSE
ENSG00000114999	TTL	HAVANA	gene	8	protein_coding	5.77391	5.35092	0.42299	0.00596451	0.0534639	FALSE	FALSE
ENSG00000167114	SLC27A4	HAVANA	gene	13	protein_coding	6.35395	5.8784	0.475549	0.00598274	0.0535898	FALSE	FALSE
ENSG00000105220	GPI	HAVANA	gene	17	protein_coding	9.16101	8.60068	0.560325	0.00598866	0.0536054	FALSE	FALSE
ENSG00000167536	DHRS13	HAVANA	gene	14	protein_coding	5.58628	5.02849	0.557797	0.00599542	0.0536285	FALSE	FALSE
ENSG00000112365	ZBTB24	HAVANA	gene	4	protein_coding	2.6809	3.32752	-0.646623	0.00604184	0.0540061	FALSE	FALSE
ENSG00000198919	DZIP3	HAVANA	gene	13	protein_coding	6.36012	5.8011	0.559022	0.0060499	0.0540404	FALSE	FALSE
ENSG00000161671	EMC10	HAVANA	gene	16	protein_coding	6.55555	6.97908	-0.423537	0.0060593	0.0540867	FALSE	FALSE
ENSG00000100284	TOM1	HAVANA	gene	21	protein_coding	6.52095	6.03454	0.486407	0.00608489	0.0542773	FALSE	FALSE
ENSG00000173947	PIFO	HAVANA	gene	14	protein_coding	2.83589	3.71706	-0.881174	0.0060984	0.0543103	FALSE	FALSE
ENSG00000116117	PARD3B	HAVANA	gene	18	protein_coding	2.24315	3.35943	-1.11628	0.00613191	0.0543103	FALSE	FALSE
ENSG00000115661	STK16	HAVANA	gene	14	protein_coding	5.29402	4.8315	0.462521	0.00611508	0.0543103	FALSE	FALSE
ENSG00000182903	ZNF721	HAVANA	gene	16	protein_coding	4.16345	4.61691	-0.453462	0.00611062	0.0543103	FALSE	FALSE
ENSG00000183783	KCTD8	HAVANA	gene	7	protein_coding	4.80653	4.15439	0.652147	0.00612408	0.0543103	FALSE	FALSE
ENSG00000145335	SNCA	HAVANA	gene	15	protein_coding	7.90113	7.0947	0.806436	0.00609747	0.0543103	FALSE	FALSE
ENSG00000183665	TRMT12	HAVANA	gene	5	protein_coding	3.14029	1.99132	1.14897	0.00613516	0.0543103	FALSE	FALSE
ENSG00000095397	WHRN	HAVANA	gene	14	protein_coding	5.10677	4.61289	0.493878	0.00612578	0.0543103	FALSE	FALSE
ENSG00000167965	MLST8	HAVANA	gene	18	protein_coding	6.36899	5.93676	0.432231	0.00612948	0.0543103	FALSE	FALSE
ENSG00000141452	RMC1	HAVANA	gene	10	protein_coding	3.45438	4.13093	-0.676553	0.00611785	0.0543103	FALSE	FALSE
ENSG00000204851	PNMA8B	HAVANA	gene	7	protein_coding	8.31839	7.71539	0.602996	0.00612486	0.0543103	FALSE	FALSE
ENSG00000109089	CDR2L	HAVANA	gene	7	protein_coding	4.00284	4.75393	-0.751094	0.00615056	0.0544091	FALSE	FALSE
ENSG00000147588	PMP2	HAVANA	gene	7	protein_coding	8.81747	9.32669	-0.509218	0.00615645	0.0544237	FALSE	FALSE
ENSG00000149474	KAT14	HAVANA	gene	13	protein_coding	4.22369	4.87537	-0.651682	0.00617532	0.0545529	FALSE	FALSE
ENSG00000156804	FBXO32	HAVANA	gene	7	protein_coding	3.94298	5.37622	-1.43323	0.006209	0.0548127	FALSE	FALSE
ENSG00000147251	DOCK11	HAVANA	gene	15	protein_coding	3.96953	3.04938	0.920143	0.00621652	0.0548413	FALSE	FALSE
ENSG00000214367	HAUS3	HAVANA	gene	8	protein_coding	2.71952	3.25245	-0.532936	0.00622321	0.0548626	FALSE	FALSE
ENSG00000226419	SLC16A1-AS1	HAVANA	gene	8	lncRNA	1.68625	2.7431	-1.05684	0.00625011	0.0550327	FALSE	FALSE
ENSG00000183230	CTNNA3	HAVANA	gene	17	protein_coding	3.02354	4.29421	-1.27067	0.00625108	0.0550327	FALSE	FALSE
ENSG00000117154	IGSF21	HAVANA	gene	12	protein_coding	3.94584	4.78984	-0.844002	0.00630963	0.0550871	FALSE	FALSE
ENSG00000162599	NFIA	HAVANA	gene	17	protein_coding	6.49352	7.08468	-0.591164	0.00629264	0.0550871	FALSE	FALSE
ENSG00000081692	JMJD4	HAVANA	gene	12	protein_coding	5.18373	4.62861	0.555121	0.00626996	0.0550871	FALSE	FALSE
ENSG00000109436	TBC1D9	HAVANA	gene	8	protein_coding	6.35244	5.55373	0.798717	0.00627448	0.0550871	FALSE	FALSE
ENSG00000113387	SUB1	HAVANA	gene	12	protein_coding	8.62172	8.01802	0.603702	0.00628048	0.0550871	FALSE	FALSE
ENSG00000196586	MYO6	HAVANA	gene	16	protein_coding	5.62483	6.23008	-0.605249	0.00628521	0.0550871	FALSE	FALSE
ENSG00000196911	KPNA5	HAVANA	gene	11	protein_coding	5.45163	4.9391	0.51253	0.00631158	0.0550871	FALSE	FALSE
ENSG00000166257	SCN3B	HAVANA	gene	9	protein_coding	7.16859	6.54343	0.62516	0.00626595	0.0550871	FALSE	FALSE
ENSG00000023608	SNAPC1	HAVANA	gene	5	protein_coding	4.34947	3.64686	0.702612	0.00630167	0.0550871	FALSE	FALSE
ENSG00000177946	CENPBD1	HAVANA	gene	6	protein_coding	4.15083	3.60394	0.546894	0.0062931	0.0550871	FALSE	FALSE
ENSG00000141338	ABCA8	HAVANA	gene	14	protein_coding	3.99458	4.61126	-0.616679	0.00631514	0.0550871	FALSE	FALSE
ENSG00000134758	RNF138	HAVANA	gene	14	protein_coding	3.80046	4.33567	-0.53521	0.00629886	0.0550871	FALSE	FALSE
ENSG00000099341	PSMD8	HAVANA	gene	11	protein_coding	7.46896	6.83709	0.631866	0.00627352	0.0550871	FALSE	FALSE
ENSG00000142541	RPL13A	HAVANA	gene	17	protein_coding	9.54723	9.93999	-0.392763	0.00631739	0.0550871	FALSE	FALSE
ENSG00000120156	TEK	HAVANA	gene	21	protein_coding	3.17715	3.76169	-0.584546	0.00632906	0.0551514	FALSE	FALSE
ENSG00000116675	DNAJC6	HAVANA	gene	16	protein_coding	8.76654	8.19864	0.567898	0.00635087	0.0551996	FALSE	FALSE
ENSG00000128641	MYO1B	HAVANA	gene	19	protein_coding	2.79209	3.61074	-0.81865	0.0063559	0.0551996	FALSE	FALSE
ENSG00000104687	GSR	HAVANA	gene	14	protein_coding	5.85771	5.3391	0.518607	0.00635343	0.0551996	FALSE	FALSE
ENSG00000173267	SNCG	HAVANA	gene	14	protein_coding	9.68295	8.89011	0.792835	0.00635611	0.0551996	FALSE	FALSE
ENSG00000112787	FBRSL1	HAVANA	gene	13	protein_coding	4.5255	5.07843	-0.55293	0.00635183	0.0551996	FALSE	FALSE
ENSG00000112561	TFEB	HAVANA	gene	18	protein_coding	3.9541	4.73283	-0.77873	0.00637206	0.0553007	FALSE	FALSE
ENSG00000164171	ITGA2	HAVANA	gene	11	protein_coding	1.74048	3.14998	-1.4095	0.00638295	0.055326	FALSE	FALSE
ENSG00000158296	SLC13A3	HAVANA	gene	14	protein_coding	2.93881	4.09418	-1.15537	0.0063836	0.055326	FALSE	FALSE
ENSG00000157873	TNFRSF14	HAVANA	gene	17	protein_coding	1.90031	2.98822	-1.08791	0.00641244	0.0553823	FALSE	FALSE
ENSG00000172733	PURG	HAVANA	gene	11	protein_coding	2.16804	3.38537	-1.21733	0.00640361	0.0553823	FALSE	FALSE
ENSG00000137055	PLAA	HAVANA	gene	15	protein_coding	4.86231	4.37065	0.49166	0.00642028	0.0553823	FALSE	FALSE
ENSG00000198879	SFMBT2	HAVANA	gene	11	protein_coding	2.77028	3.90442	-1.13414	0.00641189	0.0553823	FALSE	FALSE
ENSG00000156671	SAMD8	HAVANA	gene	15	protein_coding	5.49578	5.92813	-0.432347	0.00642032	0.0553823	FALSE	FALSE
ENSG00000250366	TUNAR	HAVANA	gene	2	protein_coding	5.27291	4.48329	0.789616	0.00640006	0.0553823	FALSE	FALSE
ENSG00000205476	CCDC85C	HAVANA	gene	9	protein_coding	4.38371	4.96338	-0.579664	0.00640332	0.0553823	FALSE	FALSE
ENSG00000228793	AL033523.1	HAVANA	gene	2	lncRNA	1.29561	2.83961	-1.54401	0.00642972	0.0554261	FALSE	FALSE
ENSG00000116396	KCNC4	HAVANA	gene	14	protein_coding	7.41438	6.74903	0.665346	0.00644292	0.0554444	FALSE	FALSE
ENSG00000099139	PCSK5	HAVANA	gene	13	protein_coding	3.57646	2.91631	0.660148	0.00644481	0.0554444	FALSE	FALSE
ENSG00000180739	S1PR5	HAVANA	gene	14	protein_coding	3.52142	4.28244	-0.761016	0.00644388	0.0554444	FALSE	FALSE
ENSG00000130775	THEMIS2	HAVANA	gene	16	protein_coding	2.10341	3.18051	-1.0771	0.00645083	0.055457	FALSE	FALSE
ENSG00000165495	PKNOX2	HAVANA	gene	16	protein_coding	2.3436	3.44064	-1.09704	0.00645493	0.055457	FALSE	FALSE
ENSG00000171951	SCG2	HAVANA	gene	5	protein_coding	10.3509	9.60551	0.745424	0.00647171	0.055564	FALSE	FALSE
ENSG00000101180	HRH3	HAVANA	gene	16	protein_coding	5.6646	5.03168	0.632921	0.00647912	0.0555904	FALSE	FALSE
ENSG00000132471	WBP2	HAVANA	gene	12	protein_coding	9.17313	8.69678	0.476356	0.00648976	0.0556445	FALSE	FALSE
ENSG00000103507	BCKDK	HAVANA	gene	14	protein_coding	5.87037	5.31176	0.558609	0.00652776	0.0559329	FALSE	FALSE
ENSG00000197177	ADGRA1	HAVANA	gene	15	protein_coding	5.94865	5.40809	0.540564	0.00654216	0.0559815	FALSE	FALSE
ENSG00000072134	EPN2	HAVANA	gene	15	protein_coding	5.5848	6.03603	-0.451234	0.00654178	0.0559815	FALSE	FALSE
ENSG00000198355	PIM3	HAVANA	gene	5	protein_coding	5.96483	5.42598	0.538849	0.00654927	0.056005	FALSE	FALSE
ENSG00000157782	CABP1	HAVANA	gene	9	protein_coding	5.33678	4.65972	0.67706	0.00656367	0.0560907	FALSE	FALSE
ENSG00000146242	TPBG	HAVANA	gene	8	protein_coding	2.04484	3.43024	-1.38539	0.00657847	0.0561424	FALSE	FALSE
ENSG00000198730	CTR9	HAVANA	gene	9	protein_coding	5.08464	4.34802	0.736627	0.00657823	0.0561424	FALSE	FALSE
ENSG00000144834	TAGLN3	HAVANA	gene	14	protein_coding	8.70212	7.99921	0.702914	0.00660278	0.0563124	FALSE	FALSE
ENSG00000168754	FAM178B	HAVANA	gene	15	protein_coding	1.51889	2.74814	-1.22925	0.00661923	0.0563526	FALSE	FALSE
ENSG00000165280	VCP	HAVANA	gene	16	protein_coding	7.88617	7.36732	0.518849	0.00661696	0.0563526	FALSE	FALSE
ENSG00000099954	CECR2	HAVANA	gene	18	protein_coding	2.36864	3.40332	-1.03468	0.00662067	0.0563526	FALSE	FALSE
ENSG00000198715	GLMP	HAVANA	gene	13	protein_coding	4.91277	4.25725	0.655523	0.00666346	0.0566478	FALSE	FALSE
ENSG00000271971	AC120053.1	HAVANA	gene	1	lncRNA	1.31564	2.55994	-1.24431	0.00666419	0.0566478	FALSE	FALSE
ENSG00000062282	DGAT2	HAVANA	gene	15	protein_coding	3.86273	3.18502	0.677709	0.00667467	0.0566993	FALSE	FALSE
ENSG00000068912	ERLEC1	HAVANA	gene	14	protein_coding	7.24187	6.72635	0.515512	0.00672937	0.0570496	FALSE	FALSE
ENSG00000120278	PLEKHG1	HAVANA	gene	16	protein_coding	3.25118	4.48496	-1.23378	0.0067337	0.0570496	FALSE	FALSE
ENSG00000154134	ROBO3	HAVANA	gene	15	protein_coding	2.83313	3.51035	-0.677212	0.00672864	0.0570496	FALSE	FALSE
ENSG00000198242	RPL23A	HAVANA	gene	14	protein_coding	8.96919	9.45843	-0.489246	0.00673059	0.0570496	FALSE	FALSE
ENSG00000181991	MRPS11	HAVANA	gene	16	protein_coding	6.43994	5.83888	0.601057	0.00675052	0.0571329	FALSE	FALSE
ENSG00000007174	DNAH9	HAVANA	gene	18	protein_coding	2.44994	3.51365	-1.06371	0.00675243	0.0571329	FALSE	FALSE
ENSG00000068120	COASY	HAVANA	gene	15	protein_coding	5.8431	5.30334	0.539766	0.0067795	0.0573241	FALSE	FALSE
ENSG00000118181	RPS25	HAVANA	gene	11	protein_coding	9.00319	9.46201	-0.458821	0.00678875	0.0573267	FALSE	FALSE
ENSG00000258636	AL121821.2	HAVANA	gene	2	lncRNA	3.56801	2.68796	0.880047	0.00678666	0.0573267	FALSE	FALSE
ENSG00000242110	AMACR	HAVANA	gene	8	protein_coding	4.9105	4.38848	0.522022	0.0068369	0.0576574	FALSE	FALSE
ENSG00000135678	CPM	HAVANA	gene	12	protein_coding	3.25277	4.35971	-1.10694	0.00683507	0.0576574	FALSE	FALSE
ENSG00000112038	OPRM1	HAVANA	gene	18	protein_coding	3.66503	4.62681	-0.961785	0.00685673	0.0577667	FALSE	FALSE
ENSG00000176406	RIMS2	HAVANA	gene	23	protein_coding	5.67689	5.07069	0.606201	0.00685886	0.0577667	FALSE	FALSE
ENSG00000116489	CAPZA1	HAVANA	gene	13	protein_coding	7.02638	6.39704	0.629342	0.00687552	0.0578283	FALSE	FALSE
ENSG00000198791	CNOT7	HAVANA	gene	12	protein_coding	6.60745	6.10255	0.504905	0.00687971	0.0578283	FALSE	FALSE
ENSG00000124209	RAB22A	HAVANA	gene	4	protein_coding	6.41034	5.90147	0.50886	0.00687772	0.0578283	FALSE	FALSE
ENSG00000180071	ANKRD18A	HAVANA	gene	20	protein_coding	1.60043	2.8854	-1.28497	0.00688521	0.0578366	FALSE	FALSE
ENSG00000283907	AD000090.1	HAVANA	gene	1	lncRNA	3.30201	4.67949	-1.37748	0.0068907	0.0578449	FALSE	FALSE
ENSG00000134684	YARS	HAVANA	gene	10	protein_coding	6.97295	6.35383	0.619125	0.00691058	0.057936	FALSE	FALSE
ENSG00000070614	NDST1	HAVANA	gene	15	protein_coding	5.75397	6.25731	-0.503345	0.00690879	0.057936	FALSE	FALSE
ENSG00000060237	WNK1	HAVANA	gene	17	protein_coding	7.685	8.07516	-0.390167	0.00692763	0.058041	FALSE	FALSE
ENSG00000119599	DCAF4	HAVANA	gene	17	protein_coding	4.25216	3.54837	0.703784	0.00693672	0.0580792	FALSE	FALSE
ENSG00000103126	AXIN1	HAVANA	gene	15	protein_coding	3.40667	3.99289	-0.586221	0.00695094	0.0581224	FALSE	FALSE
ENSG00000071564	TCF3	HAVANA	gene	16	protein_coding	2.41283	3.68094	-1.26811	0.00694778	0.0581224	FALSE	FALSE
ENSG00000115216	NRBP1	HAVANA	gene	14	protein_coding	6.90315	6.43584	0.467312	0.00699301	0.058398	FALSE	FALSE
ENSG00000157654	PALM2-AKAP2	HAVANA	gene	18	protein_coding	6.45827	5.98909	0.469174	0.00698893	0.058398	FALSE	FALSE
ENSG00000105088	OLFM2	HAVANA	gene	8	protein_coding	7.19672	6.63869	0.558023	0.00700958	0.0584983	FALSE	FALSE
ENSG00000136279	DBNL	HAVANA	gene	20	protein_coding	6.82138	6.44198	0.379397	0.00702075	0.0585154	FALSE	FALSE
ENSG00000101445	PPP1R16B	HAVANA	gene	10	protein_coding	4.8361	5.38839	-0.552283	0.0070178	0.0585154	FALSE	FALSE
ENSG00000112139	MDGA1	HAVANA	gene	16	protein_coding	2.28534	3.24113	-0.95579	0.00702619	0.0585227	FALSE	FALSE
ENSG00000115414	FN1	HAVANA	gene	19	protein_coding	5.59956	6.2271	-0.627538	0.00708535	0.0586347	FALSE	FALSE
ENSG00000114544	SLC41A3	HAVANA	gene	16	protein_coding	6.98553	6.40781	0.577721	0.00707425	0.0586347	FALSE	FALSE
ENSG00000064651	SLC12A2	HAVANA	gene	14	protein_coding	6.67234	7.19066	-0.518319	0.00705995	0.0586347	FALSE	FALSE
ENSG00000188483	IER5L	HAVANA	gene	8	protein_coding	2.94217	3.67131	-0.729146	0.00707848	0.0586347	FALSE	FALSE
ENSG00000095637	SORBS1	HAVANA	gene	22	protein_coding	5.74114	6.15838	-0.417244	0.00707747	0.0586347	FALSE	FALSE
ENSG00000213390	ARHGAP19	HAVANA	gene	11	protein_coding	2.5145	3.62016	-1.10566	0.00704462	0.0586347	FALSE	FALSE
ENSG00000261526	AC012615.1	HAVANA	gene	2	lncRNA	1.7864	2.87188	-1.08548	0.00708198	0.0586347	FALSE	FALSE
ENSG00000127445	PIN1	HAVANA	gene	13	protein_coding	8.66532	8.0842	0.581122	0.00707082	0.0586347	FALSE	FALSE
ENSG00000125843	AP5S1	HAVANA	gene	11	protein_coding	4.67004	4.01215	0.657895	0.00705897	0.0586347	FALSE	FALSE
ENSG00000100105	PATZ1	HAVANA	gene	18	protein_coding	4.2407	4.90492	-0.664212	0.00706898	0.0586347	FALSE	FALSE
ENSG00000231500	RPS18	HAVANA	gene	7	protein_coding	9.19363	9.66583	-0.472204	0.00710574	0.0587655	FALSE	FALSE
ENSG00000088833	NSFL1C	HAVANA	gene	17	protein_coding	7.06089	6.61682	0.44407	0.00711288	0.0587867	FALSE	FALSE
ENSG00000183087	GAS6	HAVANA	gene	15	protein_coding	7.27694	6.74751	0.529435	0.00711765	0.0587883	FALSE	FALSE
ENSG00000160284	SPATC1L	HAVANA	gene	15	protein_coding	4.77895	4.21204	0.56691	0.00714616	0.0589857	FALSE	FALSE
ENSG00000087152	ATXN7L3	HAVANA	gene	15	protein_coding	6.75431	6.30341	0.450899	0.00715402	0.0590126	FALSE	FALSE
ENSG00000108639	SYNGR2	HAVANA	gene	7	protein_coding	5.10488	5.92989	-0.825009	0.00716146	0.059036	FALSE	FALSE
ENSG00000069966	GNB5	HAVANA	gene	18	protein_coding	7.05143	6.4125	0.63893	0.00721163	0.0594032	FALSE	FALSE
ENSG00000155313	USP25	HAVANA	gene	15	protein_coding	4.92714	4.38526	0.541881	0.00721527	0.0594032	FALSE	FALSE
ENSG00000111786	SRSF9	HAVANA	gene	9	protein_coding	7.09667	6.66063	0.436039	0.00723332	0.0594755	FALSE	FALSE
ENSG00000139793	MBNL2	HAVANA	gene	18	protein_coding	6.56718	7.16303	-0.595845	0.00723281	0.0594755	FALSE	FALSE
ENSG00000158109	TPRG1L	HAVANA	gene	15	protein_coding	7.64318	7.03241	0.610771	0.00724976	0.0595388	FALSE	FALSE
ENSG00000102984	ZNF821	HAVANA	gene	15	protein_coding	4.77816	4.09638	0.681781	0.0072503	0.0595388	FALSE	FALSE
ENSG00000186868	MAPT	HAVANA	gene	15	protein_coding	8.40922	7.7936	0.615626	0.00727324	0.0596889	FALSE	FALSE
ENSG00000165782	PIP4P1	HAVANA	gene	10	protein_coding	6.15319	5.64511	0.508081	0.00729294	0.0598124	FALSE	FALSE
ENSG00000002586	CD99	HAVANA	gene	20	protein_coding	6.95891	7.41474	-0.455836	0.00729966	0.0598293	FALSE	FALSE
ENSG00000163820	FYCO1	HAVANA	gene	15	protein_coding	2.15937	3.16483	-1.00547	0.00731107	0.0598461	FALSE	FALSE
ENSG00000114021	NIT2	HAVANA	gene	12	protein_coding	5.74889	4.9475	0.80139	0.00731276	0.0598461	FALSE	FALSE
ENSG00000050130	JKAMP	HAVANA	gene	18	protein_coding	6.73955	6.09482	0.644729	0.00731571	0.0598461	FALSE	FALSE
ENSG00000176658	MYO1D	HAVANA	gene	17	protein_coding	3.11802	4.33978	-1.22175	0.0073396	0.0600032	FALSE	FALSE
ENSG00000034510	TMSB10	HAVANA	gene	6	protein_coding	10.4555	9.78236	0.673095	0.00735783	0.0600757	FALSE	FALSE
ENSG00000119943	PYROXD2	HAVANA	gene	13	protein_coding	2.13939	3.05528	-0.915898	0.00735771	0.0600757	FALSE	FALSE
ENSG00000105373	NOP53	HAVANA	gene	19	protein_coding	6.1965	6.66735	-0.470851	0.00736353	0.060084	FALSE	FALSE
ENSG00000136854	STXBP1	HAVANA	gene	21	protein_coding	9.18855	8.49491	0.693644	0.00738029	0.0601442	FALSE	FALSE
ENSG00000117906	RCN2	HAVANA	gene	14	protein_coding	8.39859	7.75841	0.640187	0.00737623	0.0601442	FALSE	FALSE
ENSG00000151458	ANKRD50	HAVANA	gene	12	protein_coding	5.0676	4.41043	0.657174	0.00738558	0.0601491	FALSE	FALSE
ENSG00000010278	CD9	HAVANA	gene	14	protein_coding	6.37163	6.83994	-0.468308	0.00739715	0.0601669	FALSE	FALSE
ENSG00000213853	EMP2	HAVANA	gene	10	protein_coding	3.68151	4.41634	-0.734827	0.00739643	0.0601669	FALSE	FALSE
ENSG00000241343	RPL36A	HAVANA	gene	9	protein_coding	8.41863	8.90272	-0.484081	0.00740254	0.0601726	FALSE	FALSE
ENSG00000142676	RPL11	HAVANA	gene	14	protein_coding	8.86796	9.29354	-0.425577	0.00743626	0.0604085	FALSE	FALSE
ENSG00000087077	TRIP6	HAVANA	gene	14	protein_coding	4.52562	5.25025	-0.724627	0.00744304	0.0604252	FALSE	FALSE
ENSG00000135823	STX6	HAVANA	gene	14	protein_coding	5.19813	4.70113	0.496998	0.00747962	0.0606454	FALSE	FALSE
ENSG00000120915	EPHX2	HAVANA	gene	14	protein_coding	5.00497	4.46937	0.535596	0.00747789	0.0606454	FALSE	FALSE
ENSG00000145439	CBR4	HAVANA	gene	12	protein_coding	5.57645	5.00285	0.573608	0.00748457	0.0606472	FALSE	FALSE
ENSG00000187193	MT1X	HAVANA	gene	9	protein_coding	8.44618	7.78519	0.66099	0.00749933	0.0607285	FALSE	FALSE
ENSG00000250786	SNHG18	HAVANA	gene	2	lncRNA	1.89277	3.07053	-1.17776	0.00750489	0.0607351	FALSE	FALSE
ENSG00000108091	CCDC6	HAVANA	gene	11	protein_coding	6.46557	5.81114	0.654434	0.00751434	0.0607733	FALSE	FALSE
ENSG00000138246	DNAJC13	HAVANA	gene	17	protein_coding	5.11792	4.53145	0.586463	0.00752628	0.0608315	FALSE	FALSE
ENSG00000110002	VWA5A	HAVANA	gene	16	protein_coding	6.11202	5.4103	0.701722	0.00758121	0.0612369	FALSE	FALSE
ENSG00000147955	SIGMAR1	HAVANA	gene	17	protein_coding	6.04041	5.57255	0.467858	0.00760024	0.061352	FALSE	FALSE
ENSG00000064666	CNN2	HAVANA	gene	15	protein_coding	1.77933	2.88575	-1.10642	0.00760752	0.0613721	FALSE	FALSE
ENSG00000116752	BCAS2	HAVANA	gene	6	protein_coding	7.062	6.51415	0.547848	0.00764216	0.0614583	FALSE	FALSE
ENSG00000136518	ACTL6A	HAVANA	gene	17	protein_coding	1.4794	2.78971	-1.31031	0.00763729	0.0614583	FALSE	FALSE
ENSG00000149489	ROM1	HAVANA	gene	8	protein_coding	3.60356	4.8254	-1.22184	0.00762564	0.0614583	FALSE	FALSE
ENSG00000111669	TPI1	HAVANA	gene	15	protein_coding	9.87774	9.38647	0.491276	0.00763827	0.0614583	FALSE	FALSE
ENSG00000105519	CAPS	HAVANA	gene	17	protein_coding	3.6674	5.09382	-1.42641	0.0076293	0.0614583	FALSE	FALSE
ENSG00000178531	CTXN1	HAVANA	gene	6	protein_coding	7.61137	6.99503	0.61634	0.00766515	0.0616045	FALSE	FALSE
ENSG00000174306	ZHX3	HAVANA	gene	21	protein_coding	5.2121	5.66047	-0.448366	0.00767888	0.0616377	FALSE	FALSE
ENSG00000044446	PHKA2	HAVANA	gene	12	protein_coding	3.31703	4.06856	-0.751533	0.00767487	0.0616377	FALSE	FALSE
ENSG00000221823	PPP3R1	HAVANA	gene	11	protein_coding	7.13224	6.56834	0.563899	0.00768471	0.0616459	FALSE	FALSE
ENSG00000119965	C10orf88	HAVANA	gene	13	protein_coding	4.45711	3.57866	0.878444	0.00770288	0.061753	FALSE	FALSE
ENSG00000172531	PPP1CA	HAVANA	gene	15	protein_coding	6.60914	6.16397	0.445172	0.0077504	0.0620952	FALSE	FALSE
ENSG00000185070	FLRT2	HAVANA	gene	11	protein_coding	5.21354	4.51621	0.697334	0.00778374	0.0623234	FALSE	FALSE
ENSG00000147459	DOCK5	HAVANA	gene	18	protein_coding	4.33285	5.05726	-0.72441	0.00781338	0.0623273	FALSE	FALSE
ENSG00000176956	LY6H	HAVANA	gene	12	protein_coding	8.66318	8.13115	0.532033	0.00780953	0.0623273	FALSE	FALSE
ENSG00000050555	LAMC3	HAVANA	gene	18	protein_coding	1.67076	2.74207	-1.07131	0.0078046	0.0623273	FALSE	FALSE
ENSG00000110700	RPS13	HAVANA	gene	7	protein_coding	8.93539	9.37388	-0.438488	0.00778988	0.0623273	FALSE	FALSE
ENSG00000178761	FAM219B	HAVANA	gene	15	protein_coding	6.29026	5.76906	0.521201	0.0077942	0.0623273	FALSE	FALSE
ENSG00000006125	AP2B1	HAVANA	gene	18	protein_coding	7.74056	7.34365	0.396913	0.00780502	0.0623273	FALSE	FALSE
ENSG00000108219	TSPAN14	HAVANA	gene	15	protein_coding	3.84503	4.57718	-0.732151	0.00782924	0.0623375	FALSE	FALSE
ENSG00000205531	NAP1L4	HAVANA	gene	13	protein_coding	7.73508	7.2928	0.442285	0.00782135	0.0623375	FALSE	FALSE
ENSG00000132475	H3F3B	HAVANA	gene	10	protein_coding	8.04648	8.57732	-0.530835	0.00782894	0.0623375	FALSE	FALSE
ENSG00000143126	CELSR2	HAVANA	gene	8	protein_coding	5.86361	6.50708	-0.643468	0.0078417	0.0623979	FALSE	FALSE
ENSG00000153214	TMEM87B	HAVANA	gene	11	protein_coding	4.61143	3.79243	0.818998	0.00785818	0.0624903	FALSE	FALSE
ENSG00000118997	DNAH7	HAVANA	gene	14	protein_coding	1.59553	2.77569	-1.18016	0.00786714	0.0625228	FALSE	FALSE
ENSG00000130762	ARHGEF16	HAVANA	gene	15	protein_coding	1.56253	2.60709	-1.04456	0.00789239	0.0625298	FALSE	FALSE
ENSG00000149571	KIRREL3	HAVANA	gene	12	protein_coding	3.58343	4.42502	-0.841585	0.00788059	0.0625298	FALSE	FALSE
ENSG00000005175	RPAP3	HAVANA	gene	10	protein_coding	5.06505	4.534	0.531051	0.00787382	0.0625298	FALSE	FALSE
ENSG00000104067	TJP1	HAVANA	gene	16	protein_coding	5.79386	6.45468	-0.660815	0.007892	0.0625298	FALSE	FALSE
ENSG00000186806	VSIG10L	HAVANA	gene	5	protein_coding	3.52324	2.3673	1.15594	0.00788763	0.0625298	FALSE	FALSE
ENSG00000030582	GRN	HAVANA	gene	18	protein_coding	6.75251	6.36253	0.38998	0.0079051	0.0625918	FALSE	FALSE
ENSG00000246695	RASSF8-AS1	HAVANA	gene	8	lncRNA	3.73105	4.39395	-0.662901	0.00792538	0.0627136	FALSE	FALSE
ENSG00000142669	SH3BGRL3	HAVANA	gene	15	protein_coding	8.28883	7.84324	0.44559	0.00794508	0.0627921	FALSE	FALSE
ENSG00000100554	ATP6V1D	HAVANA	gene	12	protein_coding	7.768	7.08572	0.682278	0.00794145	0.0627921	FALSE	FALSE
ENSG00000168918	INPP5D	HAVANA	gene	14	protein_coding	3.48614	4.13286	-0.646717	0.00795524	0.0628148	FALSE	FALSE
ENSG00000121440	PDZRN3	HAVANA	gene	15	protein_coding	3.97968	3.22031	0.759366	0.00795775	0.0628148	FALSE	FALSE
ENSG00000213062	Z99572.1	HAVANA	gene	5	lncRNA	3.11763	1.97095	1.14668	0.00799877	0.0629835	FALSE	FALSE
ENSG00000170802	FOXN2	HAVANA	gene	16	protein_coding	4.175	4.69113	-0.516135	0.00799008	0.0629835	FALSE	FALSE
ENSG00000182326	C1S	HAVANA	gene	15	protein_coding	5.74386	5.04364	0.70022	0.00799572	0.0629835	FALSE	FALSE
ENSG00000197114	ZGPAT	HAVANA	gene	11	protein_coding	4.02436	3.30325	0.721115	0.0079897	0.0629835	FALSE	FALSE
ENSG00000165959	CLMN	HAVANA	gene	12	protein_coding	3.94416	4.69442	-0.750261	0.00800772	0.0630154	FALSE	FALSE
ENSG00000118246	FASTKD2	HAVANA	gene	14	protein_coding	5.2363	4.71454	0.521762	0.00802229	0.0630565	FALSE	FALSE
ENSG00000141469	SLC14A1	HAVANA	gene	18	protein_coding	5.40528	6.07007	-0.664784	0.00802278	0.0630565	FALSE	FALSE
ENSG00000215475	SIAH3	HAVANA	gene	5	protein_coding	1.47695	2.71108	-1.23413	0.00803047	0.0630782	FALSE	FALSE
ENSG00000170266	GLB1	HAVANA	gene	16	protein_coding	5.47511	4.87989	0.595223	0.0080452	0.0631384	FALSE	FALSE
ENSG00000170027	YWHAG	HAVANA	gene	7	protein_coding	10.2215	9.5263	0.695169	0.00804797	0.0631384	FALSE	FALSE
ENSG00000116132	PRRX1	HAVANA	gene	12	protein_coding	4.03955	4.57898	-0.539423	0.00806737	0.0632103	FALSE	FALSE
ENSG00000135750	KCNK1	HAVANA	gene	15	protein_coding	4.55323	5.23061	-0.677381	0.00807191	0.0632103	FALSE	FALSE
ENSG00000128626	MRPS12	HAVANA	gene	11	protein_coding	5.26477	4.62764	0.637128	0.00806816	0.0632103	FALSE	FALSE
ENSG00000135677	GNS	HAVANA	gene	11	protein_coding	6.1002	5.62112	0.479087	0.00808212	0.0632311	FALSE	FALSE
ENSG00000101843	PSMD10	HAVANA	gene	19	protein_coding	7.28496	6.69777	0.587192	0.00808443	0.0632311	FALSE	FALSE
ENSG00000054654	SYNE2	HAVANA	gene	16	protein_coding	2.68137	3.65198	-0.970603	0.00809071	0.0632417	FALSE	FALSE
ENSG00000157600	TMEM164	HAVANA	gene	12	protein_coding	4.53627	3.858	0.678277	0.00811605	0.0634011	FALSE	FALSE
ENSG00000166111	SVOP	HAVANA	gene	10	protein_coding	6.30886	5.56941	0.739452	0.00815751	0.0636861	FALSE	FALSE
ENSG00000117868	ESYT2	HAVANA	gene	17	protein_coding	6.62426	6.17917	0.445095	0.00816865	0.0637344	FALSE	FALSE
ENSG00000234741	GAS5	HAVANA	gene	8	lncRNA	6.3118	6.80264	-0.490833	0.00819576	0.063907	FALSE	FALSE
ENSG00000086015	MAST2	HAVANA	gene	21	protein_coding	5.52153	4.87166	0.649869	0.00821794	0.064041	FALSE	FALSE
ENSG00000185046	ANKS1B	HAVANA	gene	18	protein_coding	6.45253	6.94359	-0.491068	0.00822425	0.0640513	FALSE	FALSE
ENSG00000185813	PCYT2	HAVANA	gene	10	protein_coding	6.99979	6.45792	0.541866	0.00825108	0.0642213	FALSE	FALSE
ENSG00000122574	WIPF3	HAVANA	gene	10	protein_coding	3.90908	3.20296	0.706123	0.00827827	0.0643938	FALSE	FALSE
ENSG00000169902	TPST1	HAVANA	gene	15	protein_coding	5.62183	5.03553	0.586294	0.00828335	0.0643943	FALSE	FALSE
ENSG00000044090	CUL7	HAVANA	gene	8	protein_coding	4.12981	3.35409	0.775719	0.0082988	0.0644753	FALSE	FALSE
ENSG00000021645	NRXN3	HAVANA	gene	18	protein_coding	7.10381	6.5044	0.599414	0.00831424	0.0645171	FALSE	FALSE
ENSG00000182093	GET1	HAVANA	gene	16	protein_coding	7.29533	6.63936	0.65597	0.00830982	0.0645171	FALSE	FALSE
ENSG00000197106	SLC6A17	HAVANA	gene	7	protein_coding	7.13799	6.637	0.500989	0.0083244	0.0645569	FALSE	FALSE
ENSG00000187699	C2orf88	HAVANA	gene	10	protein_coding	3.60261	4.42508	-0.822469	0.00834081	0.0645892	FALSE	FALSE
ENSG00000185189	NRBP2	HAVANA	gene	18	protein_coding	6.1457	6.56931	-0.423608	0.00834367	0.0645892	FALSE	FALSE
ENSG00000186654	PRR5	HAVANA	gene	21	protein_coding	5.15597	4.63336	0.522603	0.00834124	0.0645892	FALSE	FALSE
ENSG00000170500	LONRF2	HAVANA	gene	12	protein_coding	7.82639	7.15178	0.674617	0.00835197	0.0646144	FALSE	FALSE
ENSG00000005238	FAM214B	HAVANA	gene	19	protein_coding	6.04793	5.60323	0.444706	0.00839098	0.0648771	FALSE	FALSE
ENSG00000166925	TSC22D4	HAVANA	gene	9	protein_coding	8.3238	8.83783	-0.514033	0.0084145	0.0649415	FALSE	FALSE
ENSG00000139505	MTMR6	HAVANA	gene	11	protein_coding	6.63015	6.1458	0.484352	0.00841063	0.0649415	FALSE	FALSE
ENSG00000100156	SLC16A8	HAVANA	gene	10	protein_coding	4.27121	3.57164	0.699569	0.00841004	0.0649415	FALSE	FALSE
ENSG00000135018	UBQLN1	HAVANA	gene	14	protein_coding	7.13684	6.52545	0.611393	0.00844168	0.0651121	FALSE	FALSE
ENSG00000165512	ZNF22	HAVANA	gene	5	protein_coding	3.98195	4.52237	-0.540426	0.00848489	0.0653901	FALSE	FALSE
ENSG00000257815	AC025159.1	HAVANA	gene	6	lncRNA	1.84884	3.04297	-1.19414	0.00848791	0.0653901	FALSE	FALSE
ENSG00000185359	HGS	HAVANA	gene	13	protein_coding	6.42035	6.00489	0.415467	0.00849348	0.0653937	FALSE	FALSE
ENSG00000173473	SMARCC1	HAVANA	gene	11	protein_coding	4.58547	5.08222	-0.496754	0.00851547	0.0654843	FALSE	FALSE
ENSG00000156853	ZNF689	HAVANA	gene	13	protein_coding	1.7983	2.9668	-1.16849	0.00851116	0.0654843	FALSE	FALSE
ENSG00000278600	AC015871.4	HAVANA	gene	1	lncRNA	1.97554	3.00205	-1.02651	0.00853618	0.0655258	FALSE	FALSE
ENSG00000157625	TAB3	HAVANA	gene	15	protein_coding	4.53033	3.97104	0.559293	0.00853105	0.0655258	FALSE	FALSE
ENSG00000102226	USP11	HAVANA	gene	9	protein_coding	8.43882	7.96574	0.473077	0.00853374	0.0655258	FALSE	FALSE
ENSG00000115042	FAHD2A	HAVANA	gene	10	protein_coding	4.37162	4.88563	-0.514013	0.00854209	0.065532	FALSE	FALSE
ENSG00000159899	NPR2	HAVANA	gene	14	protein_coding	4.18447	3.4034	0.781069	0.00855442	0.0655873	FALSE	FALSE
ENSG00000126062	TMEM115	HAVANA	gene	4	protein_coding	5.43233	4.98044	0.451887	0.00856843	0.0656246	FALSE	FALSE
ENSG00000181222	POLR2A	HAVANA	gene	16	protein_coding	6.92905	6.53293	0.396117	0.00856952	0.0656246	FALSE	FALSE
ENSG00000148600	CDHR1	HAVANA	gene	15	protein_coding	4.97772	4.19407	0.783656	0.00857469	0.065625	FALSE	FALSE
ENSG00000143363	PRUNE1	HAVANA	gene	17	protein_coding	4.79875	4.11518	0.683568	0.008589	0.0656954	FALSE	FALSE
ENSG00000170382	LRRN2	HAVANA	gene	12	protein_coding	5.55535	4.84086	0.714497	0.00861505	0.0656987	FALSE	FALSE
ENSG00000104327	CALB1	HAVANA	gene	7	protein_coding	5.28705	6.52155	-1.2345	0.00861321	0.0656987	FALSE	FALSE
ENSG00000197901	SLC22A6	HAVANA	gene	11	protein_coding	2.90115	3.99532	-1.09417	0.00861454	0.0656987	FALSE	FALSE
ENSG00000168959	GRM5	HAVANA	gene	14	protein_coding	3.92036	4.71761	-0.797247	0.00860765	0.0656987	FALSE	FALSE
ENSG00000183495	EP400	HAVANA	gene	13	protein_coding	4.36867	4.88805	-0.51938	0.008606	0.0656987	FALSE	FALSE
ENSG00000184675	AMER1	HAVANA	gene	11	protein_coding	2.91134	2.23903	0.672305	0.00862393	0.0657274	FALSE	FALSE
ENSG00000142871	CCN1	HAVANA	gene	17	protein_coding	3.00385	3.75331	-0.749455	0.00863364	0.0657446	FALSE	FALSE
ENSG00000049540	ELN	HAVANA	gene	17	protein_coding	3.3857	3.94928	-0.563574	0.00863644	0.0657446	FALSE	FALSE
ENSG00000213977	TAX1BP3	HAVANA	gene	8	protein_coding	5.25316	5.87355	-0.620388	0.00864367	0.0657606	FALSE	FALSE
ENSG00000159322	ADPGK	HAVANA	gene	17	protein_coding	5.25504	4.5479	0.707146	0.00867115	0.0659284	FALSE	FALSE
ENSG00000266074	BAHCC1	HAVANA	gene	8	protein_coding	3.0622	4.14475	-1.08255	0.00868115	0.0659284	FALSE	FALSE
ENSG00000130175	PRKCSH	HAVANA	gene	9	protein_coding	6.49173	6.87979	-0.388055	0.00868082	0.0659284	FALSE	FALSE
ENSG00000188677	PARVB	HAVANA	gene	14	protein_coding	6.20205	5.55273	0.64932	0.00870647	0.0660425	FALSE	FALSE
ENSG00000102385	DRP2	HAVANA	gene	12	protein_coding	3.32086	2.56554	0.755327	0.00870408	0.0660425	FALSE	FALSE
ENSG00000140682	TGFB1I1	HAVANA	gene	19	protein_coding	1.99588	3.05813	-1.06225	0.0087193	0.0661007	FALSE	FALSE
ENSG00000110031	LPXN	HAVANA	gene	12	protein_coding	1.68058	2.87213	-1.19155	0.00872847	0.0661311	FALSE	FALSE
ENSG00000096092	TMEM14A	HAVANA	gene	6	protein_coding	7.62655	6.87224	0.75431	0.00873841	0.0661674	FALSE	FALSE
ENSG00000059915	PSD	HAVANA	gene	17	protein_coding	7.26671	6.79979	0.466917	0.00875308	0.0662003	FALSE	FALSE
ENSG00000002330	BAD	HAVANA	gene	13	protein_coding	7.05885	6.67086	0.387992	0.00874953	0.0662003	FALSE	FALSE
ENSG00000136235	GPNMB	HAVANA	gene	16	protein_coding	2.03408	3.11208	-1.078	0.00876002	0.0662138	FALSE	FALSE
ENSG00000158815	FGF17	HAVANA	gene	11	protein_coding	1.69676	3.00467	-1.30791	0.00876856	0.0662393	FALSE	FALSE
ENSG00000100030	MAPK1	HAVANA	gene	14	protein_coding	7.77819	7.38144	0.39675	0.00878889	0.0663538	FALSE	FALSE
ENSG00000153208	MERTK	HAVANA	gene	17	protein_coding	1.65752	2.95418	-1.29666	0.00879589	0.066357	FALSE	FALSE
ENSG00000111696	NT5DC3	HAVANA	gene	12	protein_coding	5.21574	4.55343	0.662304	0.00879966	0.066357	FALSE	FALSE
ENSG00000237515	SHISA9	HAVANA	gene	9	protein_coding	4.19113	4.95094	-0.759801	0.00881156	0.0664077	FALSE	FALSE
ENSG00000125503	PPP1R12C	HAVANA	gene	13	protein_coding	6.83312	6.36794	0.465178	0.00883008	0.0665082	FALSE	FALSE
ENSG00000213699	SLC35F6	HAVANA	gene	9	protein_coding	5.83402	5.21962	0.614403	0.00885277	0.0665963	FALSE	FALSE
ENSG00000213930	GALT	HAVANA	gene	11	protein_coding	5.2488	4.60869	0.640114	0.00885001	0.0665963	FALSE	FALSE
ENSG00000095739	BAMBI	HAVANA	gene	11	protein_coding	3.85188	4.44657	-0.594693	0.00885735	0.0665963	FALSE	FALSE
ENSG00000179456	ZBTB18	HAVANA	gene	10	protein_coding	4.9082	5.3609	-0.452707	0.00888903	0.0667366	FALSE	FALSE
ENSG00000186493	C5orf38	HAVANA	gene	12	protein_coding	4.16737	4.79926	-0.631893	0.00890191	0.0667366	FALSE	FALSE
ENSG00000151657	KIN	HAVANA	gene	12	protein_coding	2.6137	3.28869	-0.674989	0.0088876	0.0667366	FALSE	FALSE
ENSG00000165997	ARL5B	HAVANA	gene	5	protein_coding	4.42093	3.84655	0.574375	0.00891764	0.0667366	FALSE	FALSE
ENSG00000167528	ZNF641	HAVANA	gene	12	protein_coding	4.42529	4.01793	0.407359	0.00891723	0.0667366	FALSE	FALSE
ENSG00000139289	PHLDA1	HAVANA	gene	13	protein_coding	6.10449	5.60978	0.49471	0.00891656	0.0667366	FALSE	FALSE
ENSG00000102466	FGF14	HAVANA	gene	15	protein_coding	5.39094	4.78775	0.60319	0.00890701	0.0667366	FALSE	FALSE
ENSG00000177511	ST8SIA3	HAVANA	gene	6	protein_coding	6.62173	6.07828	0.543448	0.00889194	0.0667366	FALSE	FALSE
ENSG00000173011	TADA2B	HAVANA	gene	12	protein_coding	3.81664	4.41561	-0.59897	0.00892749	0.0667561	FALSE	FALSE
ENSG00000196544	BORCS6	HAVANA	gene	8	protein_coding	4.43884	3.99189	0.44694	0.00893065	0.0667561	FALSE	FALSE
ENSG00000259834	AL365361.1	HAVANA	gene	1	lncRNA	5.55091	4.84137	0.709545	0.00895849	0.0668084	FALSE	FALSE
ENSG00000104368	PLAT	HAVANA	gene	18	protein_coding	3.09235	4.18757	-1.09521	0.00895612	0.0668084	FALSE	FALSE
ENSG00000067369	TP53BP1	HAVANA	gene	13	protein_coding	6.59903	6.00086	0.598172	0.00895059	0.0668084	FALSE	FALSE
ENSG00000007168	PAFAH1B1	HAVANA	gene	13	protein_coding	8.3058	7.67949	0.626307	0.00895642	0.0668084	FALSE	FALSE
ENSG00000160293	VAV2	HAVANA	gene	17	protein_coding	5.09293	4.58029	0.512645	0.00896686	0.066832	FALSE	FALSE
ENSG00000115268	RPS15	HAVANA	gene	9	protein_coding	9.61822	10.0288	-0.410584	0.00897656	0.0668654	FALSE	FALSE
ENSG00000188807	TMEM201	HAVANA	gene	13	protein_coding	5.09068	4.64589	0.444797	0.00899508	0.066879	FALSE	FALSE
ENSG00000116661	FBXO2	HAVANA	gene	11	protein_coding	8.66604	8.05134	0.614703	0.00900327	0.066879	FALSE	FALSE
ENSG00000166823	MESP1	HAVANA	gene	5	protein_coding	5.79634	5.26879	0.527552	0.00899615	0.066879	FALSE	FALSE
ENSG00000065000	AP3D1	HAVANA	gene	18	protein_coding	7.42135	6.99241	0.428937	0.00899084	0.066879	FALSE	FALSE
ENSG00000102119	EMD	HAVANA	gene	10	protein_coding	6.04896	5.55184	0.497119	0.00900445	0.066879	FALSE	FALSE
ENSG00000005020	SKAP2	HAVANA	gene	13	protein_coding	5.59685	5.10601	0.490835	0.00903736	0.0670144	FALSE	FALSE
ENSG00000100528	CNIH1	HAVANA	gene	12	protein_coding	6.48212	5.99758	0.484537	0.00903835	0.0670144	FALSE	FALSE
ENSG00000105221	AKT2	HAVANA	gene	18	protein_coding	4.80328	5.27371	-0.470433	0.00902926	0.0670144	FALSE	FALSE
ENSG00000116254	CHD5	HAVANA	gene	18	protein_coding	7.24493	6.77664	0.468291	0.00904504	0.0670253	FALSE	FALSE
ENSG00000176393	RNPEP	HAVANA	gene	11	protein_coding	4.50837	3.95663	0.551745	0.00906691	0.0671098	FALSE	FALSE
ENSG00000011201	ANOS1	HAVANA	gene	12	protein_coding	5.94433	5.15466	0.789678	0.00906598	0.0671098	FALSE	FALSE
ENSG00000131981	LGALS3	HAVANA	gene	16	protein_coding	3.5315	4.40561	-0.874112	0.00907374	0.0671216	FALSE	FALSE
ENSG00000115425	PECR	HAVANA	gene	14	protein_coding	3.55921	2.44105	1.11816	0.00908416	0.0671547	FALSE	FALSE
ENSG00000184828	ZBTB7C	HAVANA	gene	10	protein_coding	1.60884	2.72996	-1.12111	0.00908868	0.0671547	FALSE	FALSE
ENSG00000007376	RPUSD1	HAVANA	gene	8	protein_coding	4.38757	3.92899	0.458583	0.0091132	0.0672971	FALSE	FALSE
ENSG00000135951	TSGA10	HAVANA	gene	15	protein_coding	2.08683	3.18561	-1.09878	0.00912409	0.0673387	FALSE	FALSE
ENSG00000092531	SNAP23	HAVANA	gene	10	protein_coding	3.43584	3.93818	-0.502338	0.0091373	0.0673975	FALSE	FALSE
ENSG00000174469	CNTNAP2	HAVANA	gene	23	protein_coding	7.21291	6.41317	0.799737	0.00914974	0.0674012	FALSE	FALSE
ENSG00000254470	AP5B1	HAVANA	gene	3	protein_coding	1.56245	2.86484	-1.30239	0.00915883	0.0674012	FALSE	FALSE
ENSG00000186073	C15orf41	HAVANA	gene	14	protein_coding	3.53794	2.5037	1.03424	0.00915456	0.0674012	FALSE	FALSE
ENSG00000103723	AP3B2	HAVANA	gene	15	protein_coding	6.30558	5.56042	0.745154	0.00915611	0.0674012	FALSE	FALSE
ENSG00000133731	IMPA1	HAVANA	gene	10	protein_coding	5.97667	5.49554	0.481125	0.00918628	0.0675458	FALSE	FALSE
ENSG00000157823	AP3S2	HAVANA	gene	17	protein_coding	6.53841	6.00528	0.533131	0.00919208	0.0675458	FALSE	FALSE
ENSG00000224877	NDUFAF8	HAVANA	gene	4	protein_coding	6.91117	7.33177	-0.420596	0.00919427	0.0675458	FALSE	FALSE
ENSG00000123983	ACSL3	HAVANA	gene	14	protein_coding	7.50885	7.03056	0.478286	0.00921627	0.0676686	FALSE	FALSE
ENSG00000234456	MAGI2-AS3	HAVANA	gene	8	lncRNA	5.02931	5.51498	-0.485673	0.00922621	0.0677029	FALSE	FALSE
ENSG00000196912	ANKRD36B	HAVANA	gene	12	protein_coding	1.62163	2.69163	-1.07	0.00924242	0.0677074	FALSE	FALSE
ENSG00000197157	SND1	HAVANA	gene	11	protein_coding	6.27927	5.85427	0.425001	0.00923354	0.0677074	FALSE	FALSE
ENSG00000132535	DLG4	HAVANA	gene	19	protein_coding	6.84867	6.39459	0.454081	0.00924267	0.0677074	FALSE	FALSE
ENSG00000163950	SLBP	HAVANA	gene	13	protein_coding	6.16644	5.68815	0.478289	0.00926737	0.0678496	FALSE	FALSE
ENSG00000107201	DDX58	HAVANA	gene	10	protein_coding	3.62593	2.96467	0.661259	0.00928176	0.0679113	FALSE	FALSE
ENSG00000105649	RAB3A	HAVANA	gene	10	protein_coding	8.75816	8.03897	0.719182	0.00929168	0.0679113	FALSE	FALSE
ENSG00000101290	CDS2	HAVANA	gene	14	protein_coding	8.02688	7.48296	0.543924	0.00928977	0.0679113	FALSE	FALSE
ENSG00000114857	NKTR	HAVANA	gene	18	protein_coding	4.91465	5.46305	-0.548393	0.00930218	0.0679494	FALSE	FALSE
ENSG00000180769	WDFY3-AS2	HAVANA	gene	10	lncRNA	4.30451	4.91354	-0.609034	0.00933041	0.0681167	FALSE	FALSE
ENSG00000103647	CORO2B	HAVANA	gene	12	protein_coding	5.82551	6.30532	-0.479806	0.00936085	0.0682794	FALSE	FALSE
ENSG00000170043	TRAPPC1	HAVANA	gene	12	protein_coding	7.14776	6.70174	0.44602	0.00936334	0.0682794	FALSE	FALSE
ENSG00000167380	ZNF226	HAVANA	gene	16	protein_coding	5.68288	5.09987	0.583008	0.00941278	0.068601	FALSE	FALSE
ENSG00000160685	ZBTB7B	HAVANA	gene	13	protein_coding	2.57317	3.45454	-0.881365	0.00943225	0.0687038	FALSE	FALSE
ENSG00000017260	ATP2C1	HAVANA	gene	19	protein_coding	7.32692	6.80681	0.520112	0.00944202	0.0687135	FALSE	FALSE
ENSG00000168081	PNOC	HAVANA	gene	9	protein_coding	3.46525	4.3228	-0.857552	0.00944938	0.0687135	FALSE	FALSE
ENSG00000109906	ZBTB16	HAVANA	gene	14	protein_coding	4.58826	5.34547	-0.757215	0.00944964	0.0687135	FALSE	FALSE
ENSG00000121691	CAT	HAVANA	gene	7	protein_coding	3.7942	4.63729	-0.843089	0.00947759	0.0688776	FALSE	FALSE
ENSG00000103260	METRN	HAVANA	gene	9	protein_coding	8.09377	8.56666	-0.472896	0.00953928	0.0692867	FALSE	FALSE
ENSG00000157870	PRXL2B	HAVANA	gene	16	protein_coding	6.84664	6.4396	0.407046	0.00958782	0.0694028	FALSE	FALSE
ENSG00000165716	DIPK1B	HAVANA	gene	11	protein_coding	6.40535	5.90277	0.502588	0.00956908	0.0694028	FALSE	FALSE
ENSG00000134285	FKBP11	HAVANA	gene	11	protein_coding	3.7988	3.27758	0.52122	0.00958753	0.0694028	FALSE	FALSE
ENSG00000111530	CAND1	HAVANA	gene	13	protein_coding	7.19937	6.62847	0.570892	0.00959292	0.0694028	FALSE	FALSE
ENSG00000182256	GABRG3	HAVANA	gene	13	protein_coding	4.49414	3.72914	0.765006	0.00958011	0.0694028	FALSE	FALSE
ENSG00000169689	CENPX	HAVANA	gene	15	protein_coding	6.62865	6.1542	0.474452	0.00956082	0.0694028	FALSE	FALSE
ENSG00000101460	MAP1LC3A	HAVANA	gene	13	protein_coding	8.96961	8.3791	0.590514	0.00959314	0.0694028	FALSE	FALSE
ENSG00000008282	SYPL1	HAVANA	gene	8	protein_coding	6.39048	6.82426	-0.43378	0.00960388	0.0694414	FALSE	FALSE
ENSG00000273253	AL022328.4	HAVANA	gene	2	lncRNA	2.01886	2.90525	-0.886396	0.00961712	0.0694979	FALSE	FALSE
ENSG00000126775	ATG14	HAVANA	gene	8	protein_coding	2.8294	3.84636	-1.01696	0.00963519	0.0695893	FALSE	FALSE
ENSG00000038427	VCAN	HAVANA	gene	16	protein_coding	4.86752	5.48466	-0.617139	0.00966428	0.0697601	FALSE	FALSE
ENSG00000113013	HSPA9	HAVANA	gene	15	protein_coding	8.10541	7.66768	0.437732	0.00967503	0.0697985	FALSE	FALSE
ENSG00000119866	BCL11A	HAVANA	gene	22	protein_coding	2.45097	3.49711	-1.04614	0.00968727	0.0698474	FALSE	FALSE
ENSG00000143195	ILDR2	HAVANA	gene	13	protein_coding	4.67694	4.07999	0.596942	0.00973372	0.0701429	FALSE	FALSE
ENSG00000114779	ABHD14B	HAVANA	gene	19	protein_coding	2.97196	3.62386	-0.651901	0.00975022	0.070183	FALSE	FALSE
ENSG00000082458	DLG3	HAVANA	gene	12	protein_coding	5.71134	5.1205	0.590846	0.00974618	0.070183	FALSE	FALSE
ENSG00000134508	CABLES1	HAVANA	gene	12	protein_coding	5.18335	5.57161	-0.388261	0.00975935	0.0702093	FALSE	FALSE
ENSG00000129990	SYT5	HAVANA	gene	15	protein_coding	6.35408	5.79334	0.560737	0.00977413	0.0702762	FALSE	FALSE
ENSG00000133026	MYH10	HAVANA	gene	12	protein_coding	6.58495	6.00544	0.579512	0.00984011	0.0706344	FALSE	FALSE
ENSG00000160606	TLCD1	HAVANA	gene	11	protein_coding	2.14277	3.23837	-1.0956	0.00983479	0.0706344	FALSE	FALSE
ENSG00000141198	TOM1L1	HAVANA	gene	16	protein_coding	2.33031	3.29461	-0.964293	0.00984047	0.0706344	FALSE	FALSE
ENSG00000159403	C1R	HAVANA	gene	18	protein_coding	3.07312	3.9902	-0.917084	0.00985243	0.0706807	FALSE	FALSE
ENSG00000142002	DPP9	HAVANA	gene	17	protein_coding	4.69283	4.1195	0.573328	0.00985835	0.0706837	FALSE	FALSE
ENSG00000261236	BOP1	HAVANA	gene	8	protein_coding	4.98793	4.54288	0.445048	0.00988314	0.0707823	FALSE	FALSE
ENSG00000203883	SOX18	HAVANA	gene	7	protein_coding	3.49933	4.80682	-1.30749	0.00988015	0.0707823	FALSE	FALSE
ENSG00000043355	ZIC2	HAVANA	gene	12	protein_coding	1.88708	3.15418	-1.2671	0.00989331	0.0708156	FALSE	FALSE
ENSG00000170624	SGCD	HAVANA	gene	13	protein_coding	2.15685	3.31889	-1.16204	0.00990478	0.0708581	FALSE	FALSE
ENSG00000145817	YIPF5	HAVANA	gene	17	protein_coding	6.20311	5.72579	0.477318	0.0099516	0.0710931	FALSE	FALSE
ENSG00000185904	LINC00839	HAVANA	gene	12	lncRNA	4.90501	4.16899	0.736026	0.0099598	0.0710931	FALSE	FALSE
ENSG00000138623	SEMA7A	HAVANA	gene	10	protein_coding	4.04401	4.82015	-0.776138	0.00994318	0.0710931	FALSE	FALSE
ENSG00000067836	ROGDI	HAVANA	gene	12	protein_coding	6.55241	7.08665	-0.534235	0.00995473	0.0710931	FALSE	FALSE
ENSG00000048544	MRPS10	HAVANA	gene	6	protein_coding	5.6128	5.06662	0.546182	0.00997098	0.0711334	FALSE	FALSE
ENSG00000162989	KCNJ3	HAVANA	gene	5	protein_coding	5.70371	5.17623	0.52748	0.0099872	0.0712094	FALSE	FALSE
ENSG00000164048	ZNF589	HAVANA	gene	14	protein_coding	1.90868	3.0066	-1.09792	0.0100542	0.0716074	FALSE	FALSE
ENSG00000221946	FXYD7	HAVANA	gene	7	protein_coding	7.10192	6.49503	0.606895	0.010053	0.0716074	FALSE	FALSE
ENSG00000160908	ZNF394	HAVANA	gene	15	protein_coding	3.86147	3.05799	0.803477	0.0100665	0.0716553	FALSE	FALSE
ENSG00000189171	S100A13	HAVANA	gene	14	protein_coding	7.79909	8.21291	-0.413819	0.0100907	0.0716858	FALSE	FALSE
ENSG00000185112	FAM43A	HAVANA	gene	6	protein_coding	4.2534	3.65434	0.599067	0.0100833	0.0716858	FALSE	FALSE
ENSG00000152784	PRDM8	HAVANA	gene	15	protein_coding	2.56484	3.98504	-1.42019	0.0100812	0.0716858	FALSE	FALSE
ENSG00000160223	ICOSLG	HAVANA	gene	17	protein_coding	3.53707	4.2911	-0.754029	0.0100931	0.0716858	FALSE	FALSE
ENSG00000164976	MYORG	HAVANA	gene	9	protein_coding	5.4898	5.91275	-0.422946	0.0101201	0.0717921	FALSE	FALSE
ENSG00000260400	AL513534.2	HAVANA	gene	1	lncRNA	2.02923	2.98382	-0.954587	0.0101265	0.0717921	FALSE	FALSE
ENSG00000175175	PPM1E	HAVANA	gene	6	protein_coding	5.39169	4.5098	0.881889	0.0101305	0.0717921	FALSE	FALSE
ENSG00000067992	PDK3	HAVANA	gene	15	protein_coding	5.77378	4.84673	0.92705	0.0101269	0.0717921	FALSE	FALSE
ENSG00000196091	MYBPC1	HAVANA	gene	14	protein_coding	5.88424	6.31223	-0.427991	0.010147	0.0718697	FALSE	FALSE
ENSG00000198830	HMGN2	HAVANA	gene	11	protein_coding	6.37062	7.02778	-0.657154	0.0101604	0.0719178	FALSE	FALSE
ENSG00000103932	RPAP1	HAVANA	gene	12	protein_coding	4.37614	3.83641	0.539731	0.010165	0.0719178	FALSE	FALSE
ENSG00000144619	CNTN4	HAVANA	gene	15	protein_coding	4.56333	3.84678	0.716545	0.0102015	0.0720166	FALSE	FALSE
ENSG00000153922	CHD1	HAVANA	gene	10	protein_coding	3.01565	4.02965	-1.014	0.0101998	0.0720166	FALSE	FALSE
ENSG00000179195	ZNF664	HAVANA	gene	16	protein_coding	6.3426	6.78255	-0.439946	0.0101907	0.0720166	FALSE	FALSE
ENSG00000108861	DUSP3	HAVANA	gene	9	protein_coding	6.59269	6.04353	0.549152	0.0101861	0.0720166	FALSE	FALSE
ENSG00000023041	ZDHHC6	HAVANA	gene	11	protein_coding	4.86048	4.18299	0.677485	0.0102219	0.072121	FALSE	FALSE
ENSG00000082438	COBLL1	HAVANA	gene	17	protein_coding	3.13445	3.67317	-0.538723	0.010235	0.072174	FALSE	FALSE
ENSG00000104267	CA2	HAVANA	gene	10	protein_coding	6.0631	6.70598	-0.642882	0.0102781	0.0723784	FALSE	FALSE
ENSG00000150764	DIXDC1	HAVANA	gene	14	protein_coding	5.11251	5.55444	-0.441936	0.0102809	0.0723784	FALSE	FALSE
ENSG00000105372	RPS19	HAVANA	gene	8	protein_coding	8.89482	9.32386	-0.429039	0.0102729	0.0723784	FALSE	FALSE
ENSG00000161558	TMEM143	HAVANA	gene	11	protein_coding	3.04377	2.35361	0.690162	0.0102992	0.0724671	FALSE	FALSE
ENSG00000203993	ARRDC1-AS1	HAVANA	gene	6	lncRNA	3.44288	3.88524	-0.442365	0.0103077	0.072487	FALSE	FALSE
ENSG00000243244	STON1	HAVANA	gene	6	protein_coding	3.51978	4.08359	-0.563807	0.0103229	0.0725547	FALSE	FALSE
ENSG00000106624	AEBP1	HAVANA	gene	11	protein_coding	5.11963	5.8259	-0.706272	0.0103604	0.0726191	FALSE	FALSE
ENSG00000205277	MUC12	HAVANA	gene	9	protein_coding	4.04935	3.24074	0.808607	0.0103461	0.0726191	FALSE	FALSE
ENSG00000130640	TUBGCP2	HAVANA	gene	13	protein_coding	6.00773	5.46939	0.538333	0.010344	0.0726191	FALSE	FALSE
ENSG00000168803	ADAL	HAVANA	gene	15	protein_coding	2.76555	3.75867	-0.993116	0.0103497	0.0726191	FALSE	FALSE
ENSG00000132470	ITGB4	HAVANA	gene	14	protein_coding	4.45753	5.13098	-0.673445	0.0103592	0.0726191	FALSE	FALSE
ENSG00000085365	SCAMP1	HAVANA	gene	18	protein_coding	7.68093	7.09487	0.586057	0.010381	0.0726445	FALSE	FALSE
ENSG00000012660	ELOVL5	HAVANA	gene	14	protein_coding	7.52716	7.08435	0.442809	0.010381	0.0726445	FALSE	FALSE
ENSG00000167785	ZNF558	HAVANA	gene	9	protein_coding	3.97827	3.24036	0.73791	0.0103765	0.0726445	FALSE	FALSE
ENSG00000116761	CTH	HAVANA	gene	12	protein_coding	3.32322	2.35678	0.966445	0.0104186	0.0728674	FALSE	FALSE
ENSG00000172809	RPL38	HAVANA	gene	13	protein_coding	9.44797	9.94833	-0.500369	0.0104366	0.072954	FALSE	FALSE
ENSG00000163453	IGFBP7	HAVANA	gene	11	protein_coding	7.7672	8.18212	-0.414919	0.010458	0.0729839	FALSE	FALSE
ENSG00000119950	MXI1	HAVANA	gene	21	protein_coding	6.02169	6.42771	-0.406014	0.0104542	0.0729839	FALSE	FALSE
ENSG00000182732	RGS6	HAVANA	gene	18	protein_coding	3.245	4.47988	-1.23488	0.0104529	0.0729839	FALSE	FALSE
ENSG00000147400	CETN2	HAVANA	gene	9	protein_coding	6.91477	6.48548	0.429289	0.0104843	0.073128	FALSE	FALSE
ENSG00000071127	WDR1	HAVANA	gene	17	protein_coding	7.11874	6.64671	0.472034	0.0104959	0.0731576	FALSE	FALSE
ENSG00000152684	PELO	HAVANA	gene	11	protein_coding	4.14751	3.52785	0.619661	0.0105	0.0731576	FALSE	FALSE
ENSG00000141642	ELAC1	HAVANA	gene	9	protein_coding	2.12254	3.01286	-0.890326	0.0105354	0.0733644	FALSE	FALSE
ENSG00000172466	ZNF24	HAVANA	gene	16	protein_coding	5.31273	5.78231	-0.469585	0.0105782	0.0736226	FALSE	FALSE
ENSG00000176148	TCP11L1	HAVANA	gene	16	protein_coding	3.57267	2.76401	0.808661	0.0106039	0.0737616	FALSE	FALSE
ENSG00000143947	RPS27A	HAVANA	gene	13	protein_coding	9.51914	9.95453	-0.435385	0.0106485	0.0739028	FALSE	FALSE
ENSG00000172292	CERS6	HAVANA	gene	14	protein_coding	5.84044	5.13225	0.708185	0.0106428	0.0739028	FALSE	FALSE
ENSG00000136938	ANP32B	HAVANA	gene	9	protein_coding	6.49163	6.92333	-0.431697	0.0106512	0.0739028	FALSE	FALSE
ENSG00000107758	PPP3CB	HAVANA	gene	15	protein_coding	7.60629	7.05941	0.546876	0.0106588	0.0739028	FALSE	FALSE
ENSG00000166685	COG1	HAVANA	gene	12	protein_coding	5.41253	4.87608	0.536453	0.0106335	0.0739028	FALSE	FALSE
ENSG00000232442	MHENCR	HAVANA	gene	1	lncRNA	3.14623	3.61997	-0.473735	0.0106582	0.0739028	FALSE	FALSE
ENSG00000161642	ZNF385A	HAVANA	gene	17	protein_coding	6.27469	6.75238	-0.477692	0.0106865	0.0740549	FALSE	FALSE
ENSG00000140992	PDPK1	HAVANA	gene	19	protein_coding	6.31639	5.88011	0.436277	0.0106998	0.0740671	FALSE	FALSE
ENSG00000089486	CDIP1	HAVANA	gene	17	protein_coding	8.38299	7.93079	0.452204	0.0106948	0.0740671	FALSE	FALSE
ENSG00000235169	SMIM1	HAVANA	gene	8	protein_coding	1.937	3.2295	-1.2925	0.0107323	0.0741925	FALSE	FALSE
ENSG00000135776	ABCB10	HAVANA	gene	5	protein_coding	4.17746	3.58438	0.593083	0.0107283	0.0741925	FALSE	FALSE
ENSG00000269028	MTRNR2L12	HAVANA	gene	3	protein_coding	13.2251	13.8037	-0.578572	0.0107481	0.0741925	FALSE	FALSE
ENSG00000138771	SHROOM3	HAVANA	gene	16	protein_coding	3.01134	2.1945	0.816841	0.0107532	0.0741925	FALSE	FALSE
ENSG00000188229	TUBB4B	HAVANA	gene	6	protein_coding	9.22307	8.58721	0.635854	0.0107584	0.0741925	FALSE	FALSE
ENSG00000129472	RAB2B	HAVANA	gene	15	protein_coding	6.078	5.57316	0.504841	0.0107502	0.0741925	FALSE	FALSE
ENSG00000123562	MORF4L2	HAVANA	gene	17	protein_coding	8.8846	8.22514	0.659461	0.0107574	0.0741925	FALSE	FALSE
ENSG00000276075	AC027682.6	HAVANA	gene	1	lncRNA	4.55878	3.79452	0.764265	0.010783	0.0743136	FALSE	FALSE
ENSG00000182481	KPNA2	HAVANA	gene	9	protein_coding	6.07214	5.35754	0.714599	0.0107875	0.0743136	FALSE	FALSE
ENSG00000221968	FADS3	HAVANA	gene	9	protein_coding	5.92859	5.31634	0.612253	0.0107985	0.074349	FALSE	FALSE
ENSG00000158711	ELK4	HAVANA	gene	13	protein_coding	3.71049	4.47852	-0.768035	0.0108296	0.0744832	FALSE	FALSE
ENSG00000011465	DCN	HAVANA	gene	17	protein_coding	5.43602	6.22507	-0.789051	0.0108272	0.0744832	FALSE	FALSE
ENSG00000125968	ID1	HAVANA	gene	9	protein_coding	5.55061	6.26851	-0.717901	0.0108529	0.0746038	FALSE	FALSE
ENSG00000155366	RHOC	HAVANA	gene	16	protein_coding	6.4328	6.92367	-0.490868	0.0108601	0.0746131	FALSE	FALSE
ENSG00000087085	ACHE	HAVANA	gene	15	protein_coding	8.15438	7.35465	0.799723	0.0108751	0.0746759	FALSE	FALSE
ENSG00000110619	CARS	HAVANA	gene	17	protein_coding	5.96927	5.30204	0.667229	0.0108906	0.0747191	FALSE	FALSE
ENSG00000103351	CLUAP1	HAVANA	gene	13	protein_coding	4.11034	4.99256	-0.882215	0.0108938	0.0747191	FALSE	FALSE
ENSG00000171903	CYP4F11	HAVANA	gene	16	protein_coding	1.88668	2.81266	-0.925983	0.0108988	0.0747191	FALSE	FALSE
ENSG00000183688	RFLNB	HAVANA	gene	4	protein_coding	1.89703	3.00331	-1.10628	0.01091	0.0747556	FALSE	FALSE
ENSG00000040341	STAU2	HAVANA	gene	18	protein_coding	6.87563	6.3518	0.523829	0.0109198	0.0747826	FALSE	FALSE
ENSG00000225470	JPX	HAVANA	gene	8	lncRNA	4.68433	5.17216	-0.487831	0.0109305	0.0748159	FALSE	FALSE
ENSG00000143772	ITPKB	HAVANA	gene	9	protein_coding	7.24196	7.70299	-0.461021	0.0109473	0.0748909	FALSE	FALSE
ENSG00000205791	LOH12CR2	HAVANA	gene	3	lncRNA	2.67498	3.34474	-0.669761	0.0109781	0.0750216	FALSE	FALSE
ENSG00000103460	TOX3	HAVANA	gene	17	protein_coding	2.26623	3.32756	-1.06133	0.010976	0.0750216	FALSE	FALSE
ENSG00000090097	PCBP4	HAVANA	gene	21	protein_coding	6.03759	6.51428	-0.476688	0.0110003	0.075054	FALSE	FALSE
ENSG00000079950	STX7	HAVANA	gene	14	protein_coding	7.1123	6.59668	0.515619	0.0109996	0.075054	FALSE	FALSE
ENSG00000174165	ZDHHC24	HAVANA	gene	8	protein_coding	5.57846	5.06691	0.511557	0.0109898	0.075054	FALSE	FALSE
ENSG00000177875	CCDC184	HAVANA	gene	5	protein_coding	6.07351	5.41131	0.662198	0.0110223	0.0751237	FALSE	FALSE
ENSG00000105737	GRIK5	HAVANA	gene	9	protein_coding	5.99826	5.47019	0.528068	0.0110178	0.0751237	FALSE	FALSE
ENSG00000160325	CACFD1	HAVANA	gene	14	protein_coding	2.99731	4.08057	-1.08327	0.0110289	0.0751286	FALSE	FALSE
ENSG00000110900	TSPAN11	HAVANA	gene	15	protein_coding	1.76129	2.86415	-1.10287	0.0110453	0.075201	FALSE	FALSE
ENSG00000130413	STK33	HAVANA	gene	15	protein_coding	2.72901	3.41686	-0.687854	0.0110529	0.0752127	FALSE	FALSE
ENSG00000122862	SRGN	HAVANA	gene	5	protein_coding	4.79116	5.49824	-0.707086	0.0110749	0.0753223	FALSE	FALSE
ENSG00000157103	SLC6A1	HAVANA	gene	12	protein_coding	7.06174	7.75604	-0.694297	0.011097	0.0754327	FALSE	FALSE
ENSG00000114859	CLCN2	HAVANA	gene	16	protein_coding	3.0939	3.86146	-0.767559	0.0111439	0.0757109	FALSE	FALSE
ENSG00000186094	AGBL4	HAVANA	gene	17	protein_coding	3.13751	2.31409	0.823425	0.0112118	0.0759983	FALSE	FALSE
ENSG00000151690	MFSD6	HAVANA	gene	15	protein_coding	7.21944	6.76815	0.451291	0.0112095	0.0759983	FALSE	FALSE
ENSG00000187068	C3orf70	HAVANA	gene	3	protein_coding	4.9291	5.59233	-0.663225	0.0112251	0.0759983	FALSE	FALSE
ENSG00000145451	GLRA3	HAVANA	gene	13	protein_coding	3.78739	4.55162	-0.764228	0.011225	0.0759983	FALSE	FALSE
ENSG00000105856	HBP1	HAVANA	gene	14	protein_coding	4.34521	4.88477	-0.539555	0.0112041	0.0759983	FALSE	FALSE
ENSG00000214013	GANC	HAVANA	gene	9	protein_coding	1.88617	2.96283	-1.07666	0.0112276	0.0759983	FALSE	FALSE
ENSG00000133275	CSNK1G2	HAVANA	gene	16	protein_coding	5.92274	5.43228	0.49046	0.0112061	0.0759983	FALSE	FALSE
ENSG00000110046	ATG2A	HAVANA	gene	13	protein_coding	5.2491	4.81643	0.43267	0.0112726	0.0762628	FALSE	FALSE
ENSG00000130294	KIF1A	HAVANA	gene	16	protein_coding	9.52949	9.12695	0.402544	0.0113245	0.0763897	FALSE	FALSE
ENSG00000014216	CAPN1	HAVANA	gene	15	protein_coding	6.52022	5.98482	0.535407	0.0113311	0.0763897	FALSE	FALSE
ENSG00000174099	MSRB3	HAVANA	gene	11	protein_coding	2.6813	3.72453	-1.04323	0.0113334	0.0763897	FALSE	FALSE
ENSG00000131748	STARD3	HAVANA	gene	16	protein_coding	4.85346	5.36439	-0.510928	0.0113082	0.0763897	FALSE	FALSE
ENSG00000177303	CASKIN2	HAVANA	gene	10	protein_coding	4.7529	5.26637	-0.513474	0.011339	0.0763897	FALSE	FALSE
ENSG00000125967	NECAB3	HAVANA	gene	16	protein_coding	5.66605	5.10635	0.559697	0.011322	0.0763897	FALSE	FALSE
ENSG00000186732	MPPED1	HAVANA	gene	14	protein_coding	2.64398	3.63423	-0.990245	0.011332	0.0763897	FALSE	FALSE
ENSG00000003096	KLHL13	HAVANA	gene	14	protein_coding	4.34328	5.24249	-0.899208	0.0112983	0.0763897	FALSE	FALSE
ENSG00000135218	CD36	HAVANA	gene	19	protein_coding	1.15789	2.56377	-1.40588	0.0113464	0.0763989	FALSE	FALSE
ENSG00000184182	UBE2F	HAVANA	gene	18	protein_coding	6.25623	5.56855	0.687675	0.0113603	0.0764325	FALSE	FALSE
ENSG00000247556	OIP5-AS1	HAVANA	gene	6	lncRNA	6.68028	7.15461	-0.474322	0.0113633	0.0764325	FALSE	FALSE
ENSG00000102024	PLS3	HAVANA	gene	18	protein_coding	5.47519	5.91622	-0.441031	0.01138	0.076505	FALSE	FALSE
ENSG00000143164	DCAF6	HAVANA	gene	15	protein_coding	5.24055	4.70083	0.539715	0.0114141	0.0766133	FALSE	FALSE
ENSG00000021762	OSBPL5	HAVANA	gene	20	protein_coding	4.69573	4.13946	0.556268	0.0114092	0.0766133	FALSE	FALSE
ENSG00000012048	BRCA1	HAVANA	gene	22	protein_coding	1.50294	2.56734	-1.0644	0.0114068	0.0766133	FALSE	FALSE
ENSG00000156508	EEF1A1	HAVANA	gene	18	protein_coding	10.6499	11.0224	-0.372549	0.0114239	0.0766395	FALSE	FALSE
ENSG00000100314	CABP7	HAVANA	gene	4	protein_coding	2.74029	3.72752	-0.98723	0.0114477	0.0767591	FALSE	FALSE
ENSG00000227500	SCAMP4	HAVANA	gene	10	protein_coding	5.39779	5.80585	-0.408067	0.0114581	0.0767884	FALSE	FALSE
ENSG00000078018	MAP2	HAVANA	gene	19	protein_coding	9.59496	9.11768	0.47728	0.0114647	0.0767924	FALSE	FALSE
ENSG00000163867	ZMYM6	HAVANA	gene	17	protein_coding	4.61753	4.10328	0.514245	0.0114915	0.076855	FALSE	FALSE
ENSG00000169087	HSPBAP1	HAVANA	gene	11	protein_coding	3.08968	2.30385	0.785822	0.011498	0.076855	FALSE	FALSE
ENSG00000177879	AP3S1	HAVANA	gene	16	protein_coding	6.64425	6.0849	0.559357	0.0114958	0.076855	FALSE	FALSE
ENSG00000078596	ITM2A	HAVANA	gene	11	protein_coding	6.10638	6.53309	-0.426704	0.0114977	0.076855	FALSE	FALSE
ENSG00000184524	CEND1	HAVANA	gene	6	protein_coding	8.54966	8.01692	0.53274	0.0115062	0.0768698	FALSE	FALSE
ENSG00000163273	NPPC	HAVANA	gene	4	protein_coding	1.68636	2.96997	-1.28361	0.0115309	0.0769944	FALSE	FALSE
ENSG00000128482	RNF112	HAVANA	gene	16	protein_coding	4.91861	4.23386	0.684751	0.0115431	0.0769959	FALSE	FALSE
ENSG00000124198	ARFGEF2	HAVANA	gene	9	protein_coding	5.24594	4.67068	0.57526	0.011538	0.0769959	FALSE	FALSE
ENSG00000162636	FAM102B	HAVANA	gene	16	protein_coding	5.26056	4.37543	0.885133	0.0115659	0.0770292	FALSE	FALSE
ENSG00000163393	SLC22A15	HAVANA	gene	13	protein_coding	3.57968	4.29905	-0.719366	0.0115725	0.0770292	FALSE	FALSE
ENSG00000120725	SIL1	HAVANA	gene	13	protein_coding	5.35972	4.90725	0.452469	0.0115665	0.0770292	FALSE	FALSE
ENSG00000165752	STK32C	HAVANA	gene	17	protein_coding	5.28392	4.71866	0.565257	0.0115781	0.0770292	FALSE	FALSE
ENSG00000149577	SIDT2	HAVANA	gene	16	protein_coding	4.51689	5.2295	-0.712611	0.0115615	0.0770292	FALSE	FALSE
ENSG00000111344	RASAL1	HAVANA	gene	11	protein_coding	2.57938	3.54882	-0.969439	0.0115864	0.0770445	FALSE	FALSE
ENSG00000187902	SHISA7	HAVANA	gene	11	protein_coding	4.14722	3.58829	0.558926	0.0116416	0.0773712	FALSE	FALSE
ENSG00000130479	MAP1S	HAVANA	gene	11	protein_coding	5.97539	5.48228	0.493111	0.0116532	0.0774087	FALSE	FALSE
ENSG00000171530	TBCA	HAVANA	gene	14	protein_coding	8.44455	7.91241	0.532132	0.0116709	0.077431	FALSE	FALSE
ENSG00000136999	CCN3	HAVANA	gene	5	protein_coding	2.11644	2.9858	-0.869364	0.0116747	0.077431	FALSE	FALSE
ENSG00000101335	MYL9	HAVANA	gene	10	protein_coding	4.97735	5.80438	-0.82703	0.0116697	0.077431	FALSE	FALSE
ENSG00000152760	TCTEX1D1	HAVANA	gene	10	protein_coding	2.98159	3.77611	-0.794529	0.0116983	0.0775476	FALSE	FALSE
ENSG00000181754	AMIGO1	HAVANA	gene	7	protein_coding	5.86098	5.38854	0.472444	0.011728	0.0775525	FALSE	FALSE
ENSG00000188643	S100A16	HAVANA	gene	11	protein_coding	5.64093	6.09495	-0.454024	0.0117247	0.0775525	FALSE	FALSE
ENSG00000144451	SPAG16	HAVANA	gene	19	protein_coding	5.27083	5.67053	-0.3997	0.0117474	0.0775525	FALSE	FALSE
ENSG00000187098	MITF	HAVANA	gene	15	protein_coding	2.47495	3.63847	-1.16352	0.0117318	0.0775525	FALSE	FALSE
ENSG00000082701	GSK3B	HAVANA	gene	15	protein_coding	6.7662	6.22034	0.545856	0.0117394	0.0775525	FALSE	FALSE
ENSG00000139132	FGD4	HAVANA	gene	14	protein_coding	4.17735	4.69118	-0.513832	0.011741	0.0775525	FALSE	FALSE
ENSG00000154856	APCDD1	HAVANA	gene	13	protein_coding	5.54812	5.8988	-0.350687	0.0117465	0.0775525	FALSE	FALSE
ENSG00000187323	DCC	HAVANA	gene	12	protein_coding	4.57186	3.47801	1.09385	0.0117325	0.0775525	FALSE	FALSE
ENSG00000101474	APMAP	HAVANA	gene	12	protein_coding	7.55012	6.97621	0.573913	0.0117662	0.0776365	FALSE	FALSE
ENSG00000115762	PLEKHB2	HAVANA	gene	16	protein_coding	8.67576	8.12063	0.555124	0.0117758	0.0776597	FALSE	FALSE
ENSG00000285184	AC244033.2	HAVANA	gene	3	lncRNA	1.48923	2.47297	-0.983733	0.0117858	0.077686	FALSE	FALSE
ENSG00000137040	RANBP6	HAVANA	gene	10	protein_coding	5.88599	5.23054	0.655457	0.0118065	0.0777823	FALSE	FALSE
ENSG00000105251	SHD	HAVANA	gene	10	protein_coding	2.08243	3.49598	-1.41355	0.011849	0.0780222	FALSE	FALSE
ENSG00000167257	RNF214	HAVANA	gene	11	protein_coding	3.71447	3.08336	0.631107	0.011864	0.0780809	FALSE	FALSE
ENSG00000203930	LINC00632	HAVANA	gene	12	lncRNA	7.09058	7.57235	-0.481764	0.0118818	0.0781578	FALSE	FALSE
ENSG00000170445	HARS	HAVANA	gene	15	protein_coding	6.56745	6.19963	0.367822	0.0118937	0.0781963	FALSE	FALSE
ENSG00000214756	CSKMT	HAVANA	gene	8	protein_coding	4.9409	5.63677	-0.695865	0.0119088	0.0781964	FALSE	FALSE
ENSG00000134294	SLC38A2	HAVANA	gene	14	protein_coding	7.39057	7.01934	0.371231	0.011912	0.0781964	FALSE	FALSE
ENSG00000128487	SPECC1	HAVANA	gene	16	protein_coding	5.12866	5.65715	-0.528491	0.0119061	0.0781964	FALSE	FALSE
ENSG00000132824	SERINC3	HAVANA	gene	14	protein_coding	8.17018	7.74004	0.43014	0.0119263	0.0782017	FALSE	FALSE
ENSG00000205856	C22orf42	HAVANA	gene	4	protein_coding	3.92913	2.56765	1.36148	0.0119311	0.0782017	FALSE	FALSE
ENSG00000198947	DMD	HAVANA	gene	15	protein_coding	4.26501	4.84734	-0.582336	0.0119311	0.0782017	FALSE	FALSE
ENSG00000145041	DCAF1	HAVANA	gene	15	protein_coding	3.18211	3.71993	-0.537824	0.0119657	0.078388	FALSE	FALSE
ENSG00000055332	EIF2AK2	HAVANA	gene	18	protein_coding	6.41099	5.9135	0.497485	0.012002	0.0785858	FALSE	FALSE
ENSG00000145725	PPIP5K2	HAVANA	gene	19	protein_coding	5.57341	5.02466	0.548742	0.0120355	0.078725	FALSE	FALSE
ENSG00000065029	ZNF76	HAVANA	gene	15	protein_coding	3.65867	4.25304	-0.594377	0.0120322	0.078725	FALSE	FALSE
ENSG00000286532	PARTICL	HAVANA	gene	1	lncRNA	3.25625	2.33175	0.924503	0.0120511	0.0787465	FALSE	FALSE
ENSG00000105223	PLD3	HAVANA	gene	20	protein_coding	9.35556	8.8286	0.526959	0.0120509	0.0787465	FALSE	FALSE
ENSG00000128923	MINDY2	HAVANA	gene	11	protein_coding	6.07713	5.71624	0.360898	0.012086	0.0789347	FALSE	FALSE
ENSG00000253716	MINCR	HAVANA	gene	6	lncRNA	2.79406	3.8427	-1.04865	0.012094	0.0789467	FALSE	FALSE
ENSG00000236609	ZNF853	HAVANA	gene	4	protein_coding	5.03643	5.82243	-0.786003	0.0121128	0.0789885	FALSE	FALSE
ENSG00000177728	TMEM94	HAVANA	gene	17	protein_coding	5.70019	6.12778	-0.42759	0.0121078	0.0789885	FALSE	FALSE
ENSG00000183098	GPC6	HAVANA	gene	11	protein_coding	3.19048	2.51218	0.678297	0.0121313	0.0789927	FALSE	FALSE
ENSG00000237289	CKMT1B	HAVANA	gene	9	protein_coding	6.5207	5.73377	0.786924	0.0121319	0.0789927	FALSE	FALSE
ENSG00000154734	ADAMTS1	HAVANA	gene	15	protein_coding	3.75488	4.6775	-0.922619	0.0121297	0.0789927	FALSE	FALSE
ENSG00000102805	CLN5	HAVANA	gene	15	protein_coding	3.91186	4.83353	-0.921673	0.0121412	0.079013	FALSE	FALSE
ENSG00000125148	MT2A	HAVANA	gene	7	protein_coding	10.7284	10.1959	0.532484	0.0121637	0.0791195	FALSE	FALSE
ENSG00000143171	RXRG	HAVANA	gene	13	protein_coding	2.22813	3.19327	-0.965136	0.0121708	0.0791254	FALSE	FALSE
ENSG00000130023	ERMARD	HAVANA	gene	16	protein_coding	2.7562	3.75635	-1.00015	0.0122023	0.07917	FALSE	FALSE
ENSG00000198642	KLHL9	HAVANA	gene	7	protein_coding	5.83265	5.38155	0.451104	0.0121993	0.07917	FALSE	FALSE
ENSG00000227051	C14orf132	HAVANA	gene	6	protein_coding	7.1025	6.7019	0.400601	0.0121978	0.07917	FALSE	FALSE
ENSG00000174444	RPL4	HAVANA	gene	15	protein_coding	8.73144	9.13508	-0.403635	0.0121899	0.07917	FALSE	FALSE
ENSG00000026508	CD44	HAVANA	gene	18	protein_coding	5.4347	5.94834	-0.513632	0.0122248	0.0792757	FALSE	FALSE
ENSG00000144381	HSPD1	HAVANA	gene	17	protein_coding	8.18773	7.6878	0.499932	0.012246	0.0793731	FALSE	FALSE
ENSG00000119048	UBE2B	HAVANA	gene	8	protein_coding	7.097	6.65737	0.439636	0.0122746	0.0794825	FALSE	FALSE
ENSG00000148484	RSU1	HAVANA	gene	18	protein_coding	5.44995	5.01134	0.438605	0.0122753	0.0794825	FALSE	FALSE
ENSG00000197763	TXNRD3	HAVANA	gene	17	protein_coding	2.82947	2.15366	0.675811	0.012298	0.0795093	FALSE	FALSE
ENSG00000106537	TSPAN13	HAVANA	gene	8	protein_coding	6.52279	5.90282	0.619964	0.0122885	0.0795093	FALSE	FALSE
ENSG00000099949	LZTR1	HAVANA	gene	21	protein_coding	5.44514	4.99506	0.450079	0.0122966	0.0795093	FALSE	FALSE
ENSG00000119326	CTNNAL1	HAVANA	gene	15	protein_coding	2.08687	2.91956	-0.832695	0.0123303	0.0796778	FALSE	FALSE
ENSG00000000003	TSPAN6	HAVANA	gene	15	protein_coding	3.4342	4.26254	-0.828345	0.0123449	0.0797323	FALSE	FALSE
ENSG00000173546	CSPG4	HAVANA	gene	7	protein_coding	4.0053	4.70191	-0.696612	0.0123712	0.0798619	FALSE	FALSE
ENSG00000133321	PLAAT4	HAVANA	gene	11	protein_coding	4.01167	4.53075	-0.519078	0.0123819	0.0798905	FALSE	FALSE
ENSG00000166848	TERF2IP	HAVANA	gene	7	protein_coding	9.00267	8.49437	0.508305	0.0123912	0.0799103	FALSE	FALSE
ENSG00000164111	ANXA5	HAVANA	gene	15	protein_coding	6.72709	7.13975	-0.412659	0.0124036	0.0799377	FALSE	FALSE
ENSG00000137842	TMEM62	HAVANA	gene	7	protein_coding	4.50288	3.90649	0.596395	0.0124079	0.0799377	FALSE	FALSE
ENSG00000107518	ATRNL1	HAVANA	gene	18	protein_coding	5.20287	4.36983	0.833039	0.0124216	0.0799859	FALSE	FALSE
ENSG00000159409	CELF3	HAVANA	gene	15	protein_coding	5.19348	4.61595	0.577532	0.0124454	0.0800991	FALSE	FALSE
ENSG00000159200	RCAN1	HAVANA	gene	18	protein_coding	6.77133	6.32174	0.44959	0.0124719	0.080229	FALSE	FALSE
ENSG00000127528	KLF2	HAVANA	gene	5	protein_coding	5.21356	5.90179	-0.688231	0.0124944	0.0803337	FALSE	FALSE
ENSG00000120519	SLC10A7	HAVANA	gene	14	protein_coding	2.96904	2.38709	0.581947	0.0125101	0.0803945	FALSE	FALSE
ENSG00000188177	ZC3H6	HAVANA	gene	14	protein_coding	5.03131	5.56075	-0.529445	0.0125515	0.0804667	FALSE	FALSE
ENSG00000146085	MMUT	HAVANA	gene	8	protein_coding	5.84258	5.33524	0.507344	0.0125527	0.0804667	FALSE	FALSE
ENSG00000127995	CASD1	HAVANA	gene	17	protein_coding	6.85297	6.34364	0.509334	0.0125329	0.0804667	FALSE	FALSE
[truncated: 10,828 more rows]

## Sheet: B_Visium_nnSVG
gene_id	gene_name	gene_type	replicated_overall_rank	overall_rank	average_rank	n_withinTop100	Br6522_LC_1_round1_single	Br6522_LC_2_round1_single	Br8153_LC_round2_left	Br8153_LC_round2_right	Br2701_LC_round2_top	Br2701_LC_round2_bottom	Br6522_LC_round3_leftbottom	Br6522_LC_round3_right	Br8079_LC_round3_left	Br8079_LC_round3_right	Br2701_LC_round3_left	Br2701_LC_round3_right	Br8153_LC_round3_left
ENSG00000105519	CAPS	protein_coding	NA	1	1	2	NA	NA	NA	NA	NA	NA	NA	NA	1	1	NA	NA	NA
ENSG00000006016	CRLF1	protein_coding	NA	2	3	1	NA	NA	NA	NA	NA	NA	NA	NA	NA	3	NA	NA	NA
ENSG00000118271	TTR	protein_coding	NA	3	9.5	2	NA	NA	NA	NA	NA	NA	NA	NA	2	NA	17	NA	NA
ENSG00000123454	DBH	protein_coding	1	4	12.3846	13	13	36	12	17	3	1	6	6	14	14	1	4	34
ENSG00000004838	ZMYND10	protein_coding	NA	5	19.5	2	NA	NA	NA	NA	NA	NA	NA	NA	18	21	NA	NA	NA
ENSG00000186710	CFAP73	protein_coding	NA	6	20	1	NA	NA	NA	NA	NA	NA	NA	NA	20	NA	NA	NA	NA
ENSG00000277586	NEFL	protein_coding	2	7	20.3077	12	5	25	9	2	18	3	11	8	40	104	9	12	18
ENSG00000103546	SLC6A2	protein_coding	3	8	22	12	47	51	11	12	NA	6	13	5	16	42	2	1	58
ENSG00000198938	MT-CO3	protein_coding	4	9	24.3846	12	4	2	1	1	11	10	3	12	3	2	236	29	3
ENSG00000135046	ANXA1	protein_coding	NA	10	26	1	NA	NA	NA	NA	NA	NA	NA	NA	NA	26	NA	NA	NA
ENSG00000180176	TH	protein_coding	5	11	28.1667	11	34	130	16	58	NA	4	30	7	8	27	7	8	9
ENSG00000132321	IQCA1	protein_coding	NA	12	31	1	NA	NA	NA	NA	NA	NA	NA	NA	NA	31	NA	NA	NA
ENSG00000154277	UCHL1	protein_coding	6	13	31.1538	13	1	13	31	10	16	34	20	51	61	99	11	10	48
ENSG00000104435	STMN2	protein_coding	7	14	31.6923	13	16	18	71	45	29	18	22	16	52	44	31	5	45
ENSG00000131095	GFAP	protein_coding	8	15	32.4615	12	102	12	59	80	22	20	24	23	10	4	20	34	12
ENSG00000123560	PLP1	protein_coding	9	16	35.3077	12	159	10	5	50	32	61	2	4	23	20	28	60	5
ENSG00000080824	HSP90AA1	protein_coding	10	17	40.2308	13	2	5	57	69	71	25	21	10	30	9	79	76	69
ENSG00000198804	MT-CO1	protein_coding	11	18	43.5385	12	27	4	4	8	2	37	36	28	6	13	93	287	21
ENSG00000197971	MBP	protein_coding	12	19	43.9231	12	9	1	8	78	84	35	1	1	7	11	27	270	39
ENSG00000165462	PHOX2A	protein_coding	NA	20	44	2	NA	NA	NA	NA	NA	NA	NA	NA	NA	NA	57	31	NA
ENSG00000269028	MTRNR2L12	protein_coding	13	21	45.3846	11	18	23	17	7	6	28	4	46	85	53	156	124	23
ENSG00000100979	PLTP	protein_coding	NA	22	45.5	2	NA	NA	NA	NA	NA	NA	NA	NA	32	59	NA	NA	NA
ENSG00000198763	MT-ND2	protein_coding	14	23	46.1538	12	28	29	10	19	7	15	31	25	5	5	74	342	10
ENSG00000266844	AC093330.1	lncRNA	NA	24	48	1	NA	NA	48	NA	NA	NA	NA	NA	NA	NA	NA	NA	NA
ENSG00000102924	CBLN1	protein_coding	NA	25	49	2	NA	NA	NA	NA	NA	NA	NA	60	NA	NA	NA	NA	38
ENSG00000113140	SPARC	protein_coding	15	26	50	10	48	31	111	39	49	39	10	54	21	34	101	106	7
ENSG00000198727	MT-CYB	protein_coding	16	27	50.8462	11	64	8	21	5	19	19	112	131	38	46	85	96	17
ENSG00000087460	GNAS	protein_coding	17	28	52.6154	13	3	16	56	71	94	29	41	89	71	74	40	63	37
ENSG00000101439	CST3	protein_coding	18	29	55.3846	11	24	42	26	22	50	47	178	41	37	22	94	135	2
ENSG00000262202	AC007952.4	lncRNA	NA	30.5	57	2	NA	NA	NA	NA	NA	NA	NA	NA	54	60	NA	NA	NA
ENSG00000177989	ODF3B	protein_coding	NA	30.5	57	1	NA	NA	NA	NA	NA	NA	NA	NA	NA	57	NA	NA	NA
ENSG00000165646	SLC18A2	protein_coding	19	32	58	12	69	476	14	6	4	11	28	34	29	24	4	2	53
ENSG00000120885	CLU	protein_coding	20	33	59.8462	11	15	57	35	68	20	31	243	91	13	7	67	120	11
ENSG00000188536	HBA2	protein_coding	NA	34	62.8889	7	87	70	27	NA	8	5	53	153	NA	NA	19	144	NA
ENSG00000125148	MT2A	protein_coding	21	35	63	10	10	60	29	11	73	92	8	13	122	93	133	174	1
ENSG00000171951	SCG2	protein_coding	22	36	63.6923	12	23	37	51	63	99	62	149	82	31	39	75	57	60
ENSG00000198886	MT-ND4	protein_coding	23	37	67.0769	11	17	9	6	15	12	26	15	19	15	17	210	503	8
ENSG00000198899	MT-ATP6	protein_coding	24	38	68.7692	10	59	11	2	4	10	43	87	136	9	16	325	178	14
ENSG00000177575	CD163	protein_coding	NA	39.5	69	2	NA	NA	NA	NA	NA	NA	NA	NA	55	83	NA	NA	NA
ENSG00000198888	MT-ND1	protein_coding	25	39.5	69	10	7	7	3	13	17	22	90	143	4	8	214	363	6
ENSG00000130203	APOE	protein_coding	NA	41	70.6923	9	35	84	66	30	34	30	174	106	91	40	109	101	19
ENSG00000206172	HBA1	protein_coding	NA	42	71.3333	2	NA	NA	NA	NA	NA	9	170	NA	NA	NA	35	NA	NA
ENSG00000258947	TUBB3	protein_coding	26	43	71.5385	10	42	71	63	14	56	41	38	27	207	193	26	32	120
ENSG00000104722	NEFM	protein_coding	27	44	71.75	10	55	58	41	236	NA	50	12	33	35	78	77	36	150
ENSG00000198840	MT-ND3	protein_coding	28	45	75.0769	10	81	6	7	3	1	2	457	18	83	52	125	116	25
ENSG00000131711	MAP1B	protein_coding	NA	46	76.7692	9	20	14	142	47	75	79	17	15	28	30	164	246	121
ENSG00000196136	SERPINA3	protein_coding	NA	47	77.5	2	NA	NA	NA	NA	NA	NA	NA	NA	64	91	NA	NA	NA
ENSG00000008283	CYB561	protein_coding	29	48	77.8333	10	433	185	13	16	NA	36	27	68	50	23	5	6	72
ENSG00000143153	ATP1B1	protein_coding	NA	49	77.8462	8	26	34	69	134	26	7	70	237	123	113	13	20	140
ENSG00000198786	MT-ND5	protein_coding	NA	50	88.7692	8	8	15	24	56	9	8	270	185	104	178	90	181	26
ENSG00000212907	MT-ND4L	protein_coding	NA	51	91.7692	9	54	24	68	27	23	32	337	45	107	224	34	150	68
ENSG00000173369	C1QB	protein_coding	NA	52	92	2	NA	NA	NA	NA	NA	NA	NA	NA	89	95	NA	NA	NA
ENSG00000170027	YWHAG	protein_coding	NA	53	92.5833	8	29	49	46	82	NA	58	78	26	299	182	102	23	137
ENSG00000108828	VAT1	protein_coding	30	54	94.9231	10	191	447	70	127	44	23	98	85	24	28	12	15	70
ENSG00000143156	NME7	protein_coding	NA	55	95	1	NA	NA	95	NA	NA	NA	NA	NA	NA	NA	NA	NA	NA
ENSG00000171885	AQP4	protein_coding	NA	56	96.8462	8	49	148	49	23	25	44	23	49	168	159	288	219	15
ENSG00000123416	TUBA1B	protein_coding	NA	57	100.231	7	22	48	125	66	60	49	55	35	233	199	107	182	122
ENSG00000228253	MT-ATP8	protein_coding	NA	58	100.615	7	51	178	33	106	13	24	369	43	125	139	92	111	24
ENSG00000149591	TAGLN	protein_coding	NA	59	104.5	1	NA	NA	NA	NA	NA	NA	NA	NA	184	25	NA	NA	NA
ENSG00000198712	MT-CO2	protein_coding	31	60	105.846	10	40	3	45	25	14	12	71	149	19	15	496	459	28
ENSG00000111640	GAPDH	protein_coding	NA	61	109.846	7	41	398	124	227	62	33	131	134	44	128	24	51	31
ENSG00000109107	ALDOC	protein_coding	NA	62	110	9	21	53	102	311	46	53	63	24	215	322	88	61	71
ENSG00000185559	DLK1	protein_coding	NA	63	110.222	5	74	239	NA	NA	NA	NA	43	64	189	191	16	3	173
ENSG00000251562	MALAT1	lncRNA	NA	64	110.3	8	30	19	99	NA	NA	NA	9	2	56	51	8	162	667
ENSG00000089199	CHGB	protein_coding	NA	65	110.7	6	115	81	28	20	NA	NA	60	37	210	NA	170	33	353
ENSG00000096384	HSP90AB1	protein_coding	NA	66	112.385	7	19	41	189	146	52	45	241	59	260	112	68	11	218
ENSG00000087250	MT3	protein_coding	NA	67	113.385	7	75	28	179	59	24	118	244	20	111	64	132	371	49
ENSG00000109472	CPE	protein_coding	NA	68	114.846	7	12	26	112	129	53	48	34	38	253	140	232	400	16
ENSG00000025708	TYMP	protein_coding	NA	69	115.5	1	NA	NA	NA	NA	NA	NA	NA	NA	62	169	NA	NA	NA
ENSG00000165795	NDRG2	protein_coding	32	70	117.154	10	94	547	86	42	45	73	65	95	59	58	154	164	41
ENSG00000173372	C1QA	protein_coding	NA	71	123	1	NA	NA	NA	NA	NA	NA	NA	NA	205	41	NA	NA	NA
ENSG00000244734	HBB	protein_coding	NA	72	124	4	199	NA	106	NA	5	17	136	50	NA	NA	14	320	269
ENSG00000282885	AL627171.2	lncRNA	NA	73	125.1	7	38	77	25	29	NA	NA	14	112	139	63	718	NA	36
ENSG00000137267	TUBB2A	protein_coding	NA	74	125.5	6	6	17	110	36	NA	137	16	204	493	292	39	21	135
ENSG00000075624	ACTB	protein_coding	NA	75	130.154	6	133	124	144	143	85	90	373	72	51	84	147	37	209
ENSG00000231389	HLA-DPA1	protein_coding	NA	76	131	0	NA	NA	NA	NA	NA	NA	NA	NA	131	NA	NA	NA	NA
ENSG00000154096	THY1	protein_coding	NA	77	132.083	6	136	139	98	43	NA	52	42	77	237	361	80	213	107
ENSG00000034510	TMSB10	protein_coding	NA	78	133.75	6	43	67	283	77	NA	115	181	166	53	86	295	163	76
ENSG00000169715	MT1E	protein_coding	NA	79	135.385	7	162	372	42	24	59	57	104	40	187	500	129	80	4
ENSG00000265972	TXNIP	protein_coding	NA	80	142	0	NA	NA	NA	NA	NA	NA	NA	NA	142	NA	NA	NA	NA
ENSG00000170315	UBB	protein_coding	NA	81	142.923	8	11	20	73	18	63	27	647	366	177	116	71	212	57
ENSG00000197746	PSAP	protein_coding	NA	82	144.769	8	62	102	289	161	89	54	543	224	47	90	62	93	66
ENSG00000160014	CALM3	protein_coding	NA	83	146.5	6	61	62	338	122	NA	139	66	47	306	284	204	42	87
ENSG00000167552	TUBA1A	protein_coding	NA	84	146.538	6	247	30	91	157	95	141	88	395	97	134	64	175	191
ENSG00000163399	ATP1A1	protein_coding	NA	85	146.75	3	233	128	180	70	NA	55	156	184	108	160	73	102	312
ENSG00000175868	CALCB	protein_coding	NA	86	147	0	NA	NA	NA	NA	NA	NA	NA	NA	NA	NA	NA	NA	147
ENSG00000143933	CALM2	protein_coding	NA	87	147.385	9	65	66	85	38	27	67	635	75	198	274	89	62	235
ENSG00000165949	IFI27	protein_coding	NA	88	148.727	6	91	129	37	130	NA	NA	74	14	45	43	248	463	362
ENSG00000135821	GLUL	protein_coding	NA	89	149.077	7	85	111	128	21	66	132	69	36	80	135	310	718	47
ENSG00000132639	SNAP25	protein_coding	NA	90	149.769	6	50	64	58	264	76	77	159	207	382	150	113	268	79
ENSG00000164241	C5orf63	protein_coding	NA	91	149.818	7	685	428	NA	NA	28	42	121	3	12	12	33	262	22
ENSG00000125462	C1orf61	protein_coding	NA	92	150.231	8	60	45	77	52	70	51	111	17	355	469	258	361	27
ENSG00000087074	PPP1R15A	protein_coding	NA	93	153	0	NA	NA	NA	NA	NA	NA	NA	NA	153	NA	NA	NA	NA
ENSG00000197756	RPL37A	protein_coding	NA	94	153.385	6	146	91	212	102	100	122	94	21	86	73	223	596	128
ENSG00000110436	SLC1A2	protein_coding	NA	95	154.417	5	32	115	62	120	51	111	18	103	206	NA	365	657	13
ENSG00000147571	CRH	protein_coding	NA	96	155	1	NA	NA	NA	NA	NA	NA	25	285	NA	NA	NA	NA	NA
ENSG00000103034	NDRG4	protein_coding	NA	97	155.333	6	77	59	331	74	NA	46	58	132	301	210	61	278	237
ENSG00000152583	SPARCL1	protein_coding	NA	98	160.923	8	53	33	67	149	92	59	37	66	336	212	332	621	35
ENSG00000130643	CALY	protein_coding	NA	99	161.5	5	125	237	138	276	NA	100	62	11	334	382	128	90	55
ENSG00000173267	SNCG	protein_coding	NA	100	161.583	3	205	133	197	119	NA	126	86	88	219	132	30	417	187
ENSG00000167996	FTH1	protein_coding	NA	101	162.308	5	319	43	119	239	78	192	46	311	88	97	130	321	127
ENSG00000159189	C1QC	protein_coding	NA	102	167.5	1	NA	NA	NA	NA	NA	NA	NA	NA	239	96	NA	NA	NA
ENSG00000152661	GJA1	protein_coding	NA	103	168.833	7	96	184	54	267	NA	38	40	124	42	85	415	652	29
ENSG00000141433	ADCYAP1	protein_coding	NA	104	169.5	1	NA	NA	NA	NA	NA	NA	NA	NA	275	NA	NA	NA	64
ENSG00000091513	TF	protein_coding	NA	105	170.417	6	461	39	15	NA	67	205	7	98	132	449	178	374	20
ENSG00000014641	MDH1	protein_coding	NA	106	170.889	2	129	40	126	408	NA	NA	158	109	NA	NA	167	100	301
ENSG00000255823	MTRNR2L8	protein_coding	NA	107	170.923	6	36	55	43	296	15	21	965	31	200	130	105	214	111
ENSG00000050165	DKK3	protein_coding	NA	108	172.083	3	126	72	147	62	NA	166	92	173	476	228	158	180	185
ENSG00000166165	CKB	protein_coding	NA	109	172.231	6	37	32	185	132	38	69	283	90	193	208	262	658	52
ENSG00000160307	S100B	protein_coding	NA	110	175.231	8	1013	123	19	366	97	85	19	157	36	48	84	189	42
ENSG00000168314	MOBP	protein_coding	NA	111	175.333	6	538	83	23	NA	115	223	5	65	43	131	56	605	217
ENSG00000078018	MAP2	protein_coding	NA	112	176.5	6	99	96	255	31	NA	97	486	141	231	376	97	115	94
ENSG00000067715	SYT1	protein_coding	NA	113	176.583	6	45	44	150	140	NA	56	162	99	387	129	25	24	858
ENSG00000133318	RTN3	protein_coding	NA	114	178.308	7	72	94	175	336	39	99	59	84	545	333	116	69	297
ENSG00000204655	MOG	protein_coding	NA	115	180	0	NA	NA	NA	NA	NA	NA	102	258	NA	NA	NA	NA	NA
ENSG00000005486	RHBDD2	protein_coding	NA	116	180.167	5	106	306	371	207	NA	96	490	221	77	56	52	54	126
ENSG00000229117	RPL41	protein_coding	NA	117	180.231	4	82	164	103	234	106	212	185	73	92	123	371	513	85
ENSG00000188229	TUBB4B	protein_coding	NA	118	183.417	3	143	332	157	147	NA	89	224	138	27	36	390	384	134
ENSG00000184009	ACTG1	protein_coding	NA	119	183.846	5	88	22	89	250	65	75	177	441	333	111	246	230	263
ENSG00000162511	LAPTM5	protein_coding	NA	120	184	0	NA	NA	NA	NA	NA	NA	NA	NA	141	227	NA	NA	NA
ENSG00000111669	TPI1	protein_coding	NA	121	186	3	123	107	251	353	21	194	56	22	339	286	302	250	114
ENSG00000198668	CALM1	protein_coding	NA	122	187.385	4	78	125	397	265	103	68	85	215	81	285	191	346	197
ENSG00000162188	GNG3	protein_coding	NA	123	189.333	3	132	464	270	225	NA	94	240	314	194	146	55	9	129
ENSG00000132872	SYT4	protein_coding	NA	124	191.818	4	230	616	116	181	NA	NA	361	200	73	77	63	107	86
ENSG00000147416	ATP6V1B2	protein_coding	NA	125	193.727	4	253	54	223	93	NA	NA	129	560	127	370	91	86	145
ENSG00000170962	PDGFD	protein_coding	NA	126	195	0	NA	NA	NA	NA	NA	NA	NA	NA	NA	NA	NA	195	NA
ENSG00000147256	ARHGAP36	protein_coding	NA	127	195.091	6	415	834	47	105	NA	16	336	238	76	NA	10	19	50
ENSG00000135916	ITM2C	protein_coding	NA	128	195.455	3	56	480	226	NA	30	40	127	142	NA	220	322	403	104
ENSG00000100285	NEFH	protein_coding	NA	129	195.727	3	277	431	219	136	NA	NA	52	39	116	243	96	322	222
ENSG00000185883	ATP6V0C	protein_coding	NA	130	198.462	5	63	140	246	32	43	86	655	30	267	419	319	112	168
ENSG00000196230	TUBB	protein_coding	NA	131	202.917	4	186	65	225	182	NA	65	232	284	186	245	65	98	602
ENSG00000117450	PRDX1	protein_coding	NA	132	203.154	2	73	268	239	141	102	176	196	74	532	155	174	319	192
ENSG00000092096	SLC22A17	protein_coding	NA	133	204.667	4	57	74	109	150	NA	144	80	105	609	560	301	200	67
ENSG00000211445	GPX3	protein_coding	NA	134	206.077	7	291	488	40	246	35	14	1139	133	33	32	3	17	208
ENSG00000130208	APOC1	protein_coding	NA	135	206.5	2	533	NA	NA	115	NA	NA	135	288	98	70	NA	NA	NA
ENSG00000264364	DYNLL2	protein_coding	NA	136	206.545	1	214	531	131	NA	NA	167	249	118	172	229	171	97	193
ENSG00000128245	YWHAH	protein_coding	NA	137	208.636	6	97	97	258	41	NA	NA	68	57	615	501	342	77	142
ENSG00000111716	LDHB	protein_coding	NA	138	209.846	5	25	27	181	218	40	72	315	42	577	302	347	436	146
ENSG00000067225	PKM	protein_coding	NA	139	210.231	3	44	131	263	402	82	151	425	257	57	101	323	251	246
ENSG00000198300	PEG3	protein_coding	NA	140	214.167	2	197	251	137	302	NA	71	535	188	335	225	141	87	101
ENSG00000111674	ENO2	protein_coding	NA	141	215.077	4	121	193	509	358	33	76	100	150	279	587	37	202	151
ENSG00000168000	BSCL2	protein_coding	NA	142	216.25	2	110	141	312	346	NA	107	207	429	133	510	23	64	213
ENSG00000105409	ATP1A3	protein_coding	NA	143	217.455	5	92	35	517	270	NA	NA	45	63	509	371	110	284	96
ENSG00000188191	PRKAR1B	protein_coding	NA	144	218.4	2	452	201	191	162	NA	NA	96	206	466	NA	120	48	242
ENSG00000133872	SARAF	protein_coding	NA	145	221.308	4	139	262	129	85	96	64	146	1284	146	137	49	186	154
ENSG00000189221	MAOA	protein_coding	NA	146	222.583	5	473	536	52	363	NA	60	61	101	318	109	15	45	538
ENSG00000107317	PTGDS	protein_coding	NA	147	222.846	5	67	38	329	180	36	134	961	126	156	388	87	304	91
ENSG00000139970	RTN1	protein_coding	NA	148	223.692	7	52	104	344	49	88	74	1197	58	377	253	51	55	206
ENSG00000006128	TAC1	protein_coding	NA	149	224.429	2	208	436	134	190	NA	NA	26	79	NA	NA	NA	NA	498
ENSG00000176788	BASP1	protein_coding	NA	150	225.455	5	46	46	92	61	NA	NA	922	62	157	201	320	454	119
ENSG00000154917	RAB6B	protein_coding	NA	151	226.333	2	333	173	374	9	NA	121	435	260	321	345	127	39	179
ENSG00000101210	EEF1A2	protein_coding	NA	152	228.273	3	284	275	268	215	NA	NA	57	110	211	465	43	44	539
ENSG00000196262	PPIA	protein_coding	NA	153	231.417	3	68	89	240	135	NA	162	345	168	527	539	244	56	204
ENSG00000127824	TUBA4A	protein_coding	NA	154.5	232	1	160	250	160	185	NA	NA	50	194	NA	NA	335	248	506
ENSG00000170458	CD14	protein_coding	NA	154.5	232	0	NA	NA	NA	NA	NA	NA	NA	NA	232	NA	NA	NA	NA
ENSG00000171314	PGAM1	protein_coding	NA	156	232.5	3	157	113	425	145	NA	177	97	121	521	525	350	78	81
ENSG00000172020	GAP43	protein_coding	NA	157	234	2	116	186	152	65	NA	NA	217	52	434	420	420	341	171
ENSG00000187193	MT1X	protein_coding	NA	158	234.111	3	104	NA	114	33	NA	NA	29	211	338	387	840	NA	51
ENSG00000189043	NDUFA4	protein_coding	NA	159	238.417	5	58	78	55	60	NA	220	656	130	719	171	201	435	78
ENSG00000137409	MTCH1	protein_coding	NA	160	239.846	4	79	191	205	95	61	135	219	388	823	390	72	330	130
ENSG00000145362	ANK2	protein_coding	NA	161	243.667	2	239	203	495	372	NA	119	192	425	213	100	225	79	262
ENSG00000097021	ACOT7	protein_coding	NA	162	243.818	1	185	510	177	92	NA	NA	108	304	188	262	285	141	430
ENSG00000010404	IDS	protein_coding	NA	163	244.75	2	31	236	121	331	NA	157	82	287	344	557	313	369	109
ENSG00000071082	RPL31	protein_coding	NA	164	246.667	2	271	63	224	81	NA	231	492	119	126	121	396	419	417
ENSG00000168268	NT5DC2	protein_coding	NA	165	249.125	4	674	NA	NA	NA	NA	NA	107	161	26	45	69	26	885
ENSG00000109971	HSPA8	protein_coding	NA	166	250	4	14	21	347	194	NA	NA	84	53	707	NA	338	604	138
ENSG00000148798	INA	protein_coding	NA	167	250.667	2	171	700	170	48	NA	NA	144	298	NA	NA	299	83	343
ENSG00000133112	TPT1	protein_coding	NA	168	251.667	3	188	87	290	223	NA	116	920	195	60	161	363	337	80
ENSG00000150625	GPM6A	protein_coding	NA	169	252.909	5	93	56	118	99	NA	NA	565	29	463	505	599	209	46
ENSG00000135744	AGT	protein_coding	NA	170	253.182	4	375	322	171	NA	NA	13	303	439	11	6	744	339	62
ENSG00000213741	RPS29	protein_coding	NA	171	253.692	1	141	321	249	117	105	142	620	198	220	235	525	381	44
ENSG00000106976	DNM1	protein_coding	NA	172	255.083	3	175	309	158	183	NA	88	72	256	553	586	42	234	405
ENSG00000073969	NSF	protein_coding	NA	173	255.091	1	120	214	428	154	NA	NA	142	335	420	359	311	240	83
ENSG00000134333	LDHA	protein_coding	NA	174	256.182	1	71	207	410	355	NA	NA	186	147	398	365	234	129	316
ENSG00000054356	PTPRN	protein_coding	NA	175	256.917	1	145	146	357	160	NA	189	1001	129	362	124	70	218	182
ENSG00000127561	SYNGR3	protein_coding	NA	176	257.545	2	758	287	194	NA	NA	130	99	420	229	142	36	109	429
ENSG00000117984	CTSD	protein_coding	NA	177	258.5	1	117	349	279	410	NA	108	305	452	84	163	139	265	431
ENSG00000148053	NTRK2	protein_coding	NA	178	260.636	1	155	433	133	231	NA	NA	125	87	309	173	472	591	158
ENSG00000105223	PLD3	protein_coding	NA	179	261.154	5	83	196	369	201	80	87	743	328	345	410	29	28	496
ENSG00000150991	UBC	protein_coding	NA	180	262.846	2	70	122	339	228	74	159	986	114	262	211	243	216	393
ENSG00000142168	SOD1	protein_coding	NA	181	263.5	3	33	166	132	57	NA	148	48	156	626	617	241	651	287
ENSG00000128016	ZFP36	protein_coding	NA	182	263.667	0	NA	NA	NA	NA	NA	NA	NA	483	167	141	NA	NA	NA
ENSG00000018625	ATP1A2	protein_coding	NA	183	265.167	3	101	271	96	377	NA	153	89	182	490	487	516	390	30
ENSG00000165678	GHITM	protein_coding	NA	184	267.545	1	109	222	257	170	NA	NA	228	94	313	618	327	378	227
ENSG00000136854	STXBP1	protein_coding	NA	185	268.583	0	189	121	195	368	NA	143	264	169	589	444	153	204	384
ENSG00000164924	YWHAZ	protein_coding	NA	186	269	4	98	288	165	75	NA	136	882	222	667	293	81	72	249
ENSG00000108576	SLC6A4	protein_coding	NA	187	270.2	0	328	280	NA	NA	NA	NA	163	313	NA	NA	NA	NA	267
ENSG00000110955	ATP5F1B	protein_coding	NA	188	271.727	3	39	47	432	96	NA	NA	331	190	467	529	391	328	139
ENSG00000129244	ATP1B2	protein_coding	NA	189	273.545	3	80	410	76	NA	NA	150	169	202	635	577	283	395	32
ENSG00000046653	GPM6B	protein_coding	NA	190	273.846	2	426	821	311	409	108	178	297	164	39	69	298	299	141
ENSG00000213190	MLLT11	protein_coding	NA	191	276	1	148	489	120	138	NA	131	522	228	324	541	297	99	275
ENSG00000122012	SV2C	protein_coding	NA	192	277.25	1	306	651	NA	NA	NA	NA	138	248	174	NA	54	215	432
ENSG00000156508	EEF1A1	protein_coding	NA	193	277.615	4	408	179	81	240	93	63	1375	107	72	117	422	329	123
ENSG00000167815	PRDX2	protein_coding	NA	194	283.167	3	158	281	491	362	NA	66	124	498	528	402	47	85	356
ENSG00000205542	TMSB4X	protein_coding	NA	195	283.385	3	569	61	139	184	110	84	83	1589	118	175	162	244	166
ENSG00000089220	PEBP1	protein_coding	NA	196	288	3	198	50	403	330	104	127	1021	56	93	309	108	305	640
ENSG00000087086	FTL	protein_coding	NA	197	291.385	5	759	190	203	327	31	78	1070	589	67	47	98	198	131
ENSG00000136160	EDNRB	protein_coding	NA	198	294.333	0	174	646	NA	NA	NA	NA	113	159	NA	NA	566	NA	108
ENSG00000127022	CANX	protein_coding	NA	199	294.5	3	216	68	501	258	NA	191	590	685	159	66	274	431	95
ENSG00000197043	ANXA6	protein_coding	NA	200	295.182	2	414	1011	373	126	NA	NA	122	120	170	281	41	68	521
ENSG00000240972	MIF	protein_coding	NA	201	296.333	2	225	453	39	325	NA	120	1138	262	171	314	203	241	65
ENSG00000135926	TMBIM1	protein_coding	NA	202	297.5	0	NA	NA	NA	NA	NA	NA	NA	NA	408	187	NA	NA	NA
ENSG00000159720	ATP6V0D1	protein_coding	NA	203	299.75	3	393	385	75	133	NA	160	1068	289	130	126	45	70	723
ENSG00000005882	PDK2	protein_coding	NA	204	300	0	NA	NA	NA	NA	NA	NA	NA	300	NA	NA	NA	NA	NA
ENSG00000109846	CRYAB	protein_coding	NA	205	300.083	4	660	602	18	NA	91	208	44	353	113	198	696	585	33
ENSG00000131507	NDFIP1	protein_coding	NA	206	300.333	0	181	195	265	173	NA	152	1031	351	430	360	149	118	199
ENSG00000115310	RTN4	protein_coding	NA	207	301.769	2	103	144	253	333	55	169	593	148	353	326	58	359	1029
ENSG00000137285	TUBB2B	protein_coding	NA	208	301.923	1	404	163	393	283	69	140	184	193	154	133	980	561	268
ENSG00000105270	CLIP3	protein_coding	NA	209	302.231	4	204	540	220	334	54	80	594	93	530	446	95	323	416
ENSG00000152932	RAB3C	protein_coding	NA	210	302.4	1	341	712	276	144	NA	NA	239	354	385	NA	86	127	360
ENSG00000128564	VGF	protein_coding	NA	211	302.5	2	410	199	NA	NA	NA	NA	165	358	63	55	972	NA	198
ENSG00000242265	PEG10	protein_coding	NA	212	302.9	2	252	391	431	375	NA	NA	546	78	542	NA	82	136	196
ENSG00000074800	ENO1	protein_coding	NA	213	303.462	1	329	566	122	188	47	106	1550	175	274	149	119	177	143
ENSG00000166426	CRABP1	protein_coding	NA	214	306.333	0	135	335	NA	NA	NA	NA	171	170	NA	NA	351	NA	676
ENSG00000126214	KLC1	protein_coding	NA	215	306.583	1	464	705	105	229	NA	95	520	303	162	363	106	108	519
ENSG00000105649	RAB3A	protein_coding	NA	216	306.9	1	182	472	248	213	NA	NA	101	86	595	NA	169	410	593
ENSG00000125814	NAPB	protein_coding	NA	217	308.417	1	173	118	269	306	NA	138	1113	426	245	535	144	59	175
ENSG00000152234	ATP5F1A	protein_coding	NA	218	309.273	2	161	90	231	398	NA	NA	231	97	812	528	397	313	144
ENSG00000171867	PRNP	protein_coding	NA	219	309.667	1	194	545	524	242	NA	91	427	322	394	136	261	223	357
ENSG00000148672	GLUD1	protein_coding	NA	220	310	0	481	325	NA	NA	NA	184	296	108	706	435	268	173	124
ENSG00000144713	RPL32	protein_coding	NA	221	311.75	2	112	886	341	37	NA	147	736	230	79	257	346	422	148
ENSG00000174684	B4GAT1	protein_coding	NA	222	312.364	0	201	149	207	191	NA	NA	501	212	628	461	462	160	264
ENSG00000161203	AP2M1	protein_coding	NA	223	313	1	281	369	336	203	NA	201	265	179	418	593	83	352	476
ENSG00000172757	CFL1	protein_coding	NA	224	316.333	1	113	697	466	114	NA	181	1194	83	266	170	190	121	201
ENSG00000177954	RPS27	protein_coding	NA	225	316.538	3	130	329	154	87	48	81	1660	154	117	151	449	504	251
ENSG00000111775	COX6A1	protein_coding	NA	226	317.333	2	302	105	74	221	NA	165	1404	317	102	268	315	481	54
ENSG00000101489	CELF4	protein_coding	NA	227	317.778	0	288	147	NA	NA	NA	NA	118	434	224	200	429	199	821
ENSG00000170540	ARL6IP1	protein_coding	NA	228	319.455	0	265	218	389	210	NA	NA	627	259	515	423	104	389	115
ENSG00000133169	BEX1	protein_coding	NA	229	320.091	2	86	259	193	245	NA	NA	663	67	593	364	218	545	288
ENSG00000166963	MAP1A	protein_coding	NA	230	320.6	1	235	210	475	NA	NA	NA	75	252	563	572	400	114	310
ENSG00000260032	NORAD	lncRNA	NA	231	320.667	1	95	208	442	204	NA	179	676	327	570	353	284	332	178
ENSG00000100097	LGALS1	protein_coding	NA	232	321.818	1	549	346	78	156	NA	NA	324	834	109	153	287	501	203
ENSG00000164919	COX6C	protein_coding	NA	233	323.364	2	84	134	107	399	NA	NA	648	44	364	430	575	660	112
ENSG00000130294	KIF1A	protein_coding	NA	234	325.692	2	111	688	405	360	83	170	992	96	293	455	172	176	233
ENSG00000172809	RPL38	protein_coding	NA	235	329.333	0	681	135	244	166	NA	155	465	127	165	252	745	707	110
ENSG00000127184	COX7C	protein_coding	NA	236	330.5	1	131	117	190	396	NA	180	200	1140	312	562	231	433	74
ENSG00000008056	SYN1	protein_coding	NA	237	330.545	0	478	114	295	NA	NA	173	218	738	328	152	307	676	157
ENSG00000166681	BEX3	protein_coding	NA	238	332.182	1	219	286	343	79	NA	NA	123	123	588	552	593	560	188
ENSG00000102144	PGK1	protein_coding	NA	239	333.818	0	210	101	113	109	NA	NA	946	104	536	568	175	220	590
ENSG00000214548	MEG3	lncRNA	NA	240	333.909	0	706	698	285	NA	NA	145	153	622	137	189	148	360	230
ENSG00000169567	HINT1	protein_coding	NA	241	335.2	0	203	172	445	322	NA	NA	454	347	415	NA	581	140	273
ENSG00000107742	SPOCK2	protein_coding	NA	242	336.455	1	256	326	364	89	NA	NA	351	137	654	477	374	412	261
ENSG00000111907	TPD52L1	protein_coding	NA	243	337	0	NA	NA	NA	NA	NA	NA	NA	337	NA	NA	NA	NA	NA
ENSG00000173786	CNP	protein_coding	NA	244	337.167	4	1211	831	38	NA	79	171	35	140	288	197	181	776	99
ENSG00000185787	MORF4L1	protein_coding	NA	245	338.5	2	89	76	340	400	NA	113	608	616	240	471	503	273	333
ENSG00000110651	CD81	protein_coding	NA	246	342.231	2	127	769	365	262	58	188	1136	210	181	214	369	509	61
ENSG00000102109	PCSK1N	protein_coding	NA	247	342.538	3	179	245	199	383	90	70	1766	146	402	530	44	263	136
ENSG00000148671	ADIRF	protein_coding	NA	248	343.667	1	575	NA	NA	NA	NA	NA	395	61	NA	NA	NA	NA	NA
ENSG00000068615	REEP1	protein_coding	NA	249	343.75	2	344	254	NA	NA	NA	NA	630	151	458	NA	32	74	807
ENSG00000140941	MAP1LC3B	protein_coding	NA	250	343.9	0	366	655	314	NA	NA	NA	366	196	505	301	150	235	351
ENSG00000198695	MT-ND6	protein_coding	NA	251	344.167	3	207	388	NA	259	68	124	1727	413	135	115	50	544	100
ENSG00000079215	SLC1A3	protein_coding	NA	252	345	3	476	95	NA	NA	NA	NA	506	734	25	18	385	641	225
ENSG00000162734	PEA15	protein_coding	NA	253	345.692	2	178	496	531	159	116	93	758	1111	140	65	184	404	259
ENSG00000154645	CHODL	protein_coding	NA	254	346.2	2	1004	NA	NA	NA	NA	NA	390	297	NA	NA	22	18	NA
ENSG00000137726	FXYD6	protein_coding	NA	255	346.273	1	150	477	297	187	NA	NA	807	447	641	295	290	38	180
ENSG00000135472	FAIM2	protein_coding	NA	256	347	1	137	98	192	112	NA	NA	683	253	428	627	500	282	505
ENSG00000145147	SLIT2	protein_coding	NA	257.5	348	0	NA	NA	NA	NA	NA	NA	NA	348	NA	NA	NA	NA	NA
ENSG00000159713	TPPP3	protein_coding	NA	257.5	348	2	683	NA	NA	142	NA	NA	81	209	49	114	435	469	950
ENSG00000158859	ADAMTS4	protein_coding	NA	259	350	0	NA	NA	NA	NA	NA	NA	NA	NA	350	NA	NA	NA	NA
ENSG00000112531	QKI	protein_coding	NA	260	351.308	1	1128	215	323	111	41	217	213	382	261	396	453	711	116
ENSG00000183044	ABAT	protein_coding	NA	261	351.545	3	90	153	264	416	NA	NA	161	1545	514	470	46	22	186
ENSG00000153130	SCOC	protein_coding	NA	262	352.167	1	381	304	398	98	NA	125	251	217	497	341	408	664	542
ENSG00000108953	YWHAE	protein_coding	NA	263	353.833	2	118	100	188	295	NA	102	1460	524	317	299	348	413	82
ENSG00000147588	PMP2	protein_coding	NA	264	354.909	1	234	739	NA	110	NA	187	214	533	316	579	377	527	88
ENSG00000141367	CLTC	protein_coding	NA	265	355.7	0	417	127	320	407	NA	NA	235	325	674	NA	398	179	475
ENSG00000067057	PFKP	protein_coding	NA	267	356	0	232	581	477	202	NA	NA	223	701	449	NA	207	272	216
ENSG00000220205	VAMP2	protein_coding	NA	267	356	2	138	553	291	116	NA	NA	1445	32	227	404	441	35	234
ENSG00000108256	NUFIP2	protein_coding	NA	267	356	0	NA	NA	NA	NA	NA	NA	NA	356	NA	NA	NA	NA	NA
ENSG00000198918	RPL39	protein_coding	NA	269	356.182	0	376	211	422	257	NA	NA	742	201	304	236	466	336	367
ENSG00000166619	BLCAP	protein_coding	NA	270	356.444	1	373	714	NA	NA	NA	NA	525	205	457	291	135	95	413
ENSG00000074317	SNCB	protein_coding	NA	271	357.222	0	501	336	530	NA	NA	NA	105	172	451	NA	711	228	181
ENSG00000136156	ITM2B	protein_coding	NA	272	357.545	2	66	52	324	195	NA	NA	1157	292	287	367	407	538	248
ENSG00000139645	ANKRD52	protein_coding	NA	273	361	0	NA	NA	NA	NA	NA	NA	NA	NA	NA	NA	361	NA	NA
ENSG00000086289	EPDR1	protein_coding	NA	274	361.5	2	420	198	238	NA	NA	NA	526	391	406	92	251	92	1001
ENSG00000106991	ENG	protein_coding	NA	275	362	0	NA	NA	NA	NA	NA	NA	NA	NA	NA	362	NA	NA	NA
ENSG00000167468	GPX4	protein_coding	NA	276	365.667	0	229	402	426	261	NA	200	644	349	346	342	277	184	728
ENSG00000163032	VSNL1	protein_coding	NA	277	365.778	1	264	176	127	171	NA	NA	51	323	809	NA	714	NA	657
ENSG00000233927	RPS28	protein_coding	NA	278	365.846	1	221	870	140	343	109	101	673	71	439	264	437	804	284
ENSG00000197694	SPTAN1	protein_coding	NA	279	366.091	1	238	159	463	26	NA	NA	209	152	818	368	360	815	419
ENSG00000104904	OAZ1	protein_coding	NA	280	366.818	2	228	1000	186	34	NA	NA	139	81	625	467	638	229	408
ENSG00000187514	PTMA	protein_coding	NA	281	367.583	0	614	301	541	299	NA	224	274	270	370	157	206	398	757
ENSG00000135940	COX5B	protein_coding	NA	282	368	0	168	162	302	206	NA	NA	830	552	252	428	661	165	322
ENSG00000128683	GAD1	protein_coding	NA	283	368.5	1	362	442	NA	NA	NA	NA	661	9	NA	NA	NA	NA	NA
ENSG00000102287	GABRE	protein_coding	NA	284	369.4	2	1479	NA	108	NA	NA	NA	NA	247	NA	NA	6	7	NA
ENSG00000105290	APLP1	protein_coding	NA	285	371	0	1232	404	245	248	NA	210	140	417	160	222	411	464	299
ENSG00000092964	DPYSL2	protein_coding	NA	286	371.917	0	151	291	480	148	NA	196	1018	523	173	378	256	494	355
ENSG00000105697	HAMP	protein_coding	NA	287	372.5	0	NA	NA	NA	NA	NA	NA	NA	NA	161	584	NA	NA	NA
ENSG00000125868	DSTN	protein_coding	NA	288	372.545	0	107	103	153	224	NA	NA	384	255	894	269	356	746	607
ENSG00000084234	APLP2	protein_coding	NA	289	372.778	1	193	80	333	308	NA	NA	268	125	NA	NA	668	595	785
ENSG00000138078	PREPL	protein_coding	NA	290	373.917	2	76	292	379	357	NA	183	1196	754	277	474	134	290	75
ENSG00000180616	SSTR2	protein_coding	NA	291	374.25	1	528	NA	NA	NA	NA	NA	NA	811	NA	NA	112	46	NA
ENSG00000128739	SNRPN	protein_coding	NA	292	374.9	0	108	160	384	192	NA	NA	508	135	838	NA	383	600	441
ENSG00000132563	REEP2	protein_coding	NA	293	377.5	1	697	112	NA	NA	NA	NA	383	359	412	NA	370	75	612
ENSG00000171858	RPS21	protein_coding	NA	294	378.273	1	440	467	267	294	NA	NA	545	266	656	206	305	617	98
ENSG00000136942	RPL35	protein_coding	NA	295	378.5	0	266	120	101	290	NA	164	731	1203	152	192	960	134	229
ENSG00000176956	LY6H	protein_coding	NA	296	379	1	1363	200	427	237	NA	NA	183	236	259	335	60	289	580
ENSG00000185567	AHNAK2	protein_coding	NA	297	379.25	1	NA	NA	NA	NA	NA	NA	211	750	NA	NA	59	497	NA
ENSG00000084764	MAPRE3	protein_coding	NA	298	379.667	1	1045	293	NA	NA	NA	NA	374	572	441	209	168	41	274
ENSG00000277443	MARCKS	protein_coding	NA	299	381.4	0	325	232	299	NA	NA	NA	839	111	376	480	446	589	117
ENSG00000125355	TMEM255A	protein_coding	NA	300	382	1	268	NA	NA	NA	NA	NA	441	331	601	NA	38	153	842
ENSG00000168824	NSG1	protein_coding	NA	301	382.2	0	218	542	486	284	NA	NA	352	586	637	NA	186	310	221
ENSG00000145248	SLC10A4	protein_coding	NA	302	383.167	1	730	890	NA	NA	NA	NA	115	294	NA	NA	240	30	NA
ENSG00000172137	CALB2	protein_coding	NA	303	385.125	1	560	327	146	NA	NA	NA	252	231	438	NA	1037	NA	90
ENSG00000265681	RPL17	protein_coding	NA	304	385.273	1	190	735	60	321	NA	NA	467	117	150	183	671	533	811
ENSG00000166448	TMEM130	protein_coding	NA	305	385.667	0	449	219	156	123	NA	NA	816	625	NA	NA	228	119	736
ENSG00000156482	RPL30	protein_coding	NA	306	385.75	0	430	434	254	316	NA	234	130	529	176	405	993	354	374
ENSG00000197457	STMN3	protein_coding	NA	307	386.364	0	169	267	151	286	NA	NA	321	772	793	639	111	105	636
ENSG00000130255	RPL36	protein_coding	NA	308	386.667	2	486	475	456	131	NA	154	1148	76	110	67	269	582	686
ENSG00000099194	SCD	protein_coding	NA	309	386.846	3	365	88	36	337	86	204	110	2505	375	290	197	252	184
ENSG00000169181	GSG1L	protein_coding	NA	310	387	0	NA	NA	NA	NA	NA	NA	NA	387	NA	NA	NA	NA	NA
ENSG00000187714	SLC18A3	protein_coding	NA	311	389	0	NA	NA	NA	NA	NA	NA	389	NA	NA	NA	NA	NA	NA
ENSG00000142541	RPL13A	protein_coding	NA	312	389.385	3	556	92	261	361	77	172	1177	603	99	107	489	537	531
ENSG00000150594	ADRA2A	protein_coding	NA	313	389.5	1	593	NA	NA	NA	NA	NA	NA	273	NA	NA	76	616	NA
ENSG00000101460	MAP1LC3A	protein_coding	NA	314	390.545	0	165	800	411	179	NA	NA	510	407	643	172	215	349	445
ENSG00000126432	PRDX5	protein_coding	NA	315	391.364	1	289	273	319	305	NA	NA	148	55	310	456	1084	654	412
ENSG00000173812	EIF1	protein_coding	NA	316.5	393.25	1	389	305	50	364	NA	163	715	219	271	231	875	614	523
ENSG00000125356	NDUFA1	protein_coding	NA	316.5	393.25	1	363	395	221	76	NA	NA	287	245	NA	NA	848	NA	711
ENSG00000137818	RPLP1	protein_coding	NA	318	393.538	0	246	908	204	273	114	156	1385	427	124	138	209	725	207
ENSG00000184524	CEND1	protein_coding	NA	319	393.8	0	550	764	345	NA	NA	NA	774	128	368	414	138	110	347
ENSG00000167658	EEF2	protein_coding	NA	320	393.818	0	345	324	178	NA	NA	229	1130	199	268	259	584	450	366
ENSG00000196628	TCF4	protein_coding	NA	321	394	0	NA	NA	NA	NA	NA	NA	NA	NA	NA	394	NA	NA	NA
ENSG00000075415	SLC25A3	protein_coding	NA	322	395.778	1	100	109	385	395	NA	NA	410	186	NA	NA	967	495	515
ENSG00000124172	ATP5F1E	protein_coding	NA	323	397.182	2	119	69	104	46	NA	NA	747	968	447	329	540	756	244
ENSG00000138326	RPS24	protein_coding	NA	324	397.333	1	399	541	408	73	NA	214	765	102	416	458	508	448	436
ENSG00000100138	SNU13	protein_coding	NA	325	398.636	0	128	444	301	382	NA	NA	155	384	501	351	641	701	397
ENSG00000176046	NUPR1	protein_coding	NA	326	399	0	NA	NA	NA	NA	NA	NA	NA	NA	417	381	NA	NA	NA
ENSG00000106211	HSPB1	protein_coding	NA	327	400	1	631	874	543	40	NA	NA	208	372	290	372	145	316	609
ENSG00000186480	INSIG1	protein_coding	NA	328.5	401	0	348	474	NA	NA	NA	NA	293	654	517	125	136	379	683
ENSG00000180155	LYNX1	protein_coding	NA	328.5	401	0	331	NA	NA	NA	NA	NA	851	355	NA	NA	196	185	488
ENSG00000203879	GDI1	protein_coding	NA	330	401.083	1	340	175	520	100	NA	197	892	430	531	620	123	460	425
ENSG00000171724	VAT1L	protein_coding	NA	331	401.3	1	206	649	72	359	NA	NA	823	192	612	NA	259	406	435
ENSG00000159164	SV2A	protein_coding	NA	332	401.5	0	353	406	450	NA	NA	NA	271	155	NA	NA	281	255	1041
ENSG00000139180	NDUFA9	protein_coding	NA	333	402	0	NA	NA	NA	NA	NA	NA	NA	402	NA	NA	NA	NA	NA
ENSG00000166710	B2M	protein_coding	NA	334	402.917	1	539	546	360	389	NA	129	660	243	103	88	698	659	421
ENSG00000130770	ATP5IF1	protein_coding	NA	335.5	404.857	0	311	389	308	301	NA	NA	403	225	NA	NA	NA	NA	897
ENSG00000163618	CADPS	protein_coding	NA	335.5	404.857	0	349	126	NA	NA	NA	NA	433	517	NA	NA	862	103	444
ENSG00000162706	CADM3	protein_coding	NA	337	405.444	0	814	310	NA	NA	NA	NA	353	555	554	352	159	231	321
ENSG00000186868	MAPT	protein_coding	NA	338	406.25	1	240	106	NA	NA	NA	NA	502	1068	791	NA	183	82	278
ENSG00000105568	PPP2R1A	protein_coding	NA	339	406.417	1	269	260	149	219	NA	109	1210	1400	155	519	66	132	389
ENSG00000117906	RCN2	protein_coding	NA	340	406.667	0	261	308	NA	NA	NA	NA	450	728	659	148	349	171	586
ENSG00000145592	RPL37	protein_coding	NA	341	407.769	1	308	347	452	313	101	193	1304	80	183	267	904	672	177
ENSG00000256618	MTRNR2L1	protein_coding	NA	342	408	4	152	116	34	176	42	82	1945	423	854	321	513	606	40
ENSG00000107130	NCS1	protein_coding	NA	343	409.111	1	856	450	NA	NA	NA	NA	379	689	534	287	188	71	228
ENSG00000085063	CD59	protein_coding	NA	344	412.182	0	276	798	353	268	NA	NA	616	745	305	273	445	236	219
ENSG00000022355	GABRA1	protein_coding	NA	345	412.6	0	531	161	NA	NA	NA	NA	459	605	NA	NA	NA	NA	307
ENSG00000164733	CTSB	protein_coding	NA	346	413	1	565	355	NA	NA	NA	NA	335	275	69	122	710	772	514
ENSG00000170296	GABARAP	protein_coding	NA	347	413.909	1	487	892	256	269	NA	NA	551	544	340	234	364	67	549
ENSG00000169992	NLGN2	protein_coding	NA	348	414	0	NA	NA	NA	NA	NA	NA	NA	414	NA	NA	NA	NA	NA
ENSG00000261115	TMEM178B	protein_coding	NA	349	415	0	NA	NA	NA	NA	NA	NA	NA	415	NA	NA	NA	NA	NA
ENSG00000139644	TMBIM6	protein_coding	NA	350	415.3	2	250	569	516	NA	NA	NA	1290	315	94	61	366	281	411
ENSG00000169020	ATP5ME	protein_coding	NA	351	416.25	1	566	253	82	274	NA	236	371	522	483	397	649	787	375
ENSG00000170091	NSG2	protein_coding	NA	352	418	0	164	285	184	282	NA	NA	1203	847	567	NA	245	172	231
ENSG00000250722	SELENOP	protein_coding	NA	353	419.7	2	1503	110	44	NA	NA	NA	109	767	238	147	337	858	84
ENSG00000139116	KIF21A	protein_coding	NA	354	420.3	1	332	445	215	NA	NA	NA	76	1300	263	226	413	139	794
ENSG00000117410	ATP6V0B	protein_coding	NA	355	420.455	0	323	629	216	NA	NA	168	944	330	469	195	358	217	776
ENSG00000109475	RPL34	protein_coding	NA	356	421.25	0	251	150	136	367	NA	161	1283	403	144	305	761	702	392
ENSG00000167191	GPRC5B	protein_coding	NA	357	421.364	0	439	586	NA	186	NA	206	381	540	507	418	571	471	330
ENSG00000134590	RTL8C	protein_coding	NA	358	421.909	1	310	73	494	152	NA	NA	311	1270	492	508	569	301	161
ENSG00000154518	ATP5MC3	protein_coding	NA	359.5	422	2	153	152	372	198	NA	NA	73	48	783	NA	995	782	664
ENSG00000163961	RNF168	protein_coding	NA	359.5	422	0	NA	NA	NA	NA	NA	NA	NA	422	NA	NA	NA	NA	NA
ENSG00000114573	ATP6V1A	protein_coding	NA	361	424.222	1	298	298	161	NA	NA	NA	1066	771	192	NA	392	65	575
ENSG00000099860	GADD45B	protein_coding	NA	362.5	425	0	NA	NA	NA	NA	NA	NA	NA	NA	425	NA	NA	NA	NA
ENSG00000153902	LGI4	protein_coding	NA	362.5	425	0	NA	NA	NA	NA	NA	NA	NA	NA	303	547	NA	NA	NA
ENSG00000105220	GPI	protein_coding	NA	364	425.364	1	254	167	460	NA	NA	83	762	814	584	546	329	211	469
ENSG00000213585	VDAC1	protein_coding	NA	365	425.6	0	315	459	NA	NA	NA	NA	776	177	NA	NA	NA	NA	401
ENSG00000113558	SKP1	protein_coding	NA	366	426	0	122	544	135	349	NA	228	1546	282	404	506	193	505	298
ENSG00000108107	RPL28	protein_coding	NA	367	426.615	1	616	710	259	28	111	133	444	881	381	317	376	550	740
ENSG00000244274	DBNDD2	protein_coding	NA	368	426.727	1	1336	727	32	NA	NA	233	150	220	128	174	775	786	133
ENSG00000158560	DYNC1I1	protein_coding	NA	369	427.375	0	354	924	NA	NA	NA	NA	295	677	190	NA	160	238	581
ENSG00000179222	MAGED1	protein_coding	NA	370	427.556	0	211	862	447	178	NA	NA	284	922	NA	NA	372	224	348
ENSG00000144834	TAGLN3	protein_coding	NA	371	428.3	0	380	374	404	NA	NA	NA	281	428	442	603	300	357	714
ENSG00000168159	RNF187	protein_coding	NA	372	429.222	0	477	348	NA	NA	NA	NA	598	404	254	380	481	125	796
ENSG00000205364	MT1M	protein_coding	NA	373	429.714	1	1158	NA	NA	NA	NA	NA	445	408	401	357	180	NA	59
ENSG00000165943	MOAP1	protein_coding	NA	374	431.625	1	244	82	292	NA	NA	NA	420	942	NA	NA	851	237	385
ENSG00000091592	NLRP1	protein_coding	NA	375	433.125	0	236	266	NA	NA	NA	NA	300	554	727	NA	953	146	283
ENSG00000224078	SNHG14	lncRNA	NA	376	433.4	0	472	422	476	NA	NA	NA	561	318	672	338	491	253	331
ENSG00000134308	YWHAQ	protein_coding	NA	377	437.25	1	263	194	497	94	NA	114	991	336	361	401	544	480	972
ENSG00000168309	FAM107A	protein_coding	NA	378	437.75	2	813	NA	NA	NA	NA	NA	896	176	65	54	238	715	545
ENSG00000131143	COX4I1	protein_coding	NA	379	439	1	154	154	84	260	NA	199	400	160	891	596	974	736	660
ENSG00000174136	RGMB	protein_coding	NA	380	439.2	1	797	NA	NA	NA	NA	NA	160	964	NA	NA	235	40	NA
ENSG00000196683	TOMM7	protein_coding	NA	381	439.8	0	305	350	148	254	NA	NA	221	645	711	393	1062	NA	309
ENSG00000167526	RPL13	protein_coding	NA	382	441.154	2	196	534	305	163	81	202	2239	612	120	76	266	499	442
ENSG00000166033	HTRA1	protein_coding	NA	383	441.583	0	336	204	284	373	NA	158	532	985	740	438	438	275	536
ENSG00000197956	S100A6	protein_coding	NA	384	442.727	0	402	783	159	314	NA	NA	187	339	367	320	837	529	633
ENSG00000142937	RPS8	protein_coding	NA	385	443.75	0	444	181	386	238	NA	230	1577	162	331	165	738	306	567
ENSG00000132471	WBP2	protein_coding	NA	386	444.083	0	482	950	469	352	NA	104	696	249	638	494	216	151	528
ENSG00000197102	DYNC1H1	protein_coding	NA	387	444.545	0	372	413	351	297	NA	NA	516	341	574	424	318	792	492
ENSG00000126247	CAPNS1	protein_coding	NA	388	444.636	0	525	456	235	NA	NA	186	1237	549	427	540	219	222	295
ENSG00000133083	DCLK1	protein_coding	NA	389	445	2	993	512	NA	NA	NA	NA	688	513	75	62	166	113	883
ENSG00000178980	SELENOW	protein_coding	NA	390	446.923	1	124	224	174	249	37	216	1929	1177	503	453	122	489	113
ENSG00000100823	APEX1	protein_coding	NA	391	448	0	NA	NA	NA	NA	NA	NA	NA	448	NA	NA	NA	NA	NA
ENSG00000180354	MTURN	protein_coding	NA	392	448.182	1	1244	401	383	NA	NA	225	77	698	147	260	254	758	483
ENSG00000112972	HMGCS1	protein_coding	NA	393	448.429	0	720	518	NA	NA	NA	NA	263	458	NA	NA	211	225	744
ENSG00000140391	TSPAN3	protein_coding	NA	394	448.583	1	318	427	335	35	NA	103	2023	409	356	102	920	192	163
ENSG00000104112	SCG3	protein_coding	NA	395	448.8	0	312	636	NA	NA	NA	NA	437	380	NA	NA	NA	NA	479
ENSG00000164587	RPS14	protein_coding	NA	396	448.917	0	280	277	275	380	NA	185	1514	343	214	403	530	827	159
ENSG00000219200	RNASEK	protein_coding	NA	397	449.2	0	406	788	196	328	NA	NA	511	232	817	NA	518	286	410
ENSG00000143546	S100A8	protein_coding	NA	398	449.5	0	NA	NA	NA	NA	NA	NA	NA	NA	421	478	NA	NA	NA
ENSG00000177432	NAP1L5	protein_coding	NA	399	449.545	0	358	216	473	101	NA	NA	859	832	389	425	242	201	849
ENSG00000168913	ENHO	protein_coding	NA	400	450.2	0	428	909	NA	NA	107	NA	1058	329	283	118	476	692	102
ENSG00000087258	GNAO1	protein_coding	NA	401	450.333	1	379	592	NA	NA	NA	NA	870	496	475	276	539	50	376
ENSG00000142534	RPS11	protein_coding	NA	402	450.545	0	320	396	217	332	NA	NA	1488	469	197	275	292	698	272
ENSG00000102226	USP11	protein_coding	NA	403	450.727	1	401	93	230	247	NA	NA	1425	492	669	490	220	245	446
ENSG00000132702	HAPLN2	protein_coding	NA	404.5	451	0	NA	NA	NA	NA	NA	NA	NA	777	180	337	510	NA	NA
ENSG00000178719	GRINA	protein_coding	NA	404.5	451	0	222	230	294	NA	NA	NA	179	470	511	NA	683	580	890
ENSG00000185043	CIB1	protein_coding	NA	406	452	0	NA	NA	NA	NA	NA	NA	NA	NA	NA	452	NA	NA	NA
ENSG00000137497	NUMA1	protein_coding	NA	407.5	453	0	NA	NA	NA	NA	NA	NA	NA	453	NA	NA	NA	NA	NA
ENSG00000111275	ALDH2	protein_coding	NA	407.5	453	0	551	680	NA	NA	NA	NA	233	191	489	NA	845	466	169
ENSG00000115762	PLEKHB2	protein_coding	NA	409	453.182	0	369	417	400	374	NA	NA	636	241	650	570	483	311	534
ENSG00000156976	EIF4A2	protein_coding	NA	410	453.364	0	105	223	390	118	NA	NA	1025	240	766	640	425	487	568
ENSG00000136750	GAD2	protein_coding	NA	411	454.5	0	859	177	NA	NA	NA	NA	669	113	NA	NA	NA	NA	NA
ENSG00000033627	ATP6V0A1	protein_coding	NA	412	454.8	1	1281	353	470	NA	NA	NA	188	187	884	416	326	25	418
ENSG00000151729	SLC25A4	protein_coding	NA	413.5	457	0	382	749	317	NA	NA	NA	275	234	NA	NA	716	NA	526
ENSG00000077080	ACTL6B	protein_coding	NA	413.5	457	0	NA	NA	NA	NA	NA	NA	NA	457	NA	NA	NA	NA	NA
ENSG00000086300	SNX10	protein_coding	NA	415	457.444	1	454	571	NA	NA	NA	NA	798	953	374	343	118	13	493
ENSG00000108946	PRKAR1A	protein_coding	NA	416	458	0	453	170	236	NA	NA	NA	923	283	687	399	467	445	517
ENSG00000214113	LYRM4	protein_coding	NA	417.5	459	0	NA	NA	NA	NA	NA	NA	NA	459	NA	NA	NA	NA	NA
ENSG00000172348	RCAN2	protein_coding	NA	417.5	459	0	568	180	NA	NA	NA	NA	206	570	NA	NA	NA	NA	771
ENSG00000112306	RPS12	protein_coding	NA	419	460.769	0	390	790	234	381	112	221	549	970	149	493	1047	274	380
ENSG00000115756	HPCAL1	protein_coding	NA	420	461.286	0	147	539	NA	NA	NA	NA	157	1249	NA	NA	582	402	153
ENSG00000110700	RPS13	protein_coding	NA	421	462.9	0	436	932	483	NA	NA	NA	237	346	613	348	828	130	276
ENSG00000122026	RPL21	protein_coding	NA	422	463.5	1	187	319	415	309	NA	190	1892	1321	68	110	227	283	241
ENSG00000166913	YWHAB	protein_coding	NA	423	463.545	1	114	212	243	51	NA	NA	861	301	323	604	950	628	812
ENSG00000147403	RPL10	protein_coding	NA	424	464	0	357	1026	218	253	NA	182	1277	796	212	233	379	425	210
ENSG00000021300	PLEKHB1	protein_coding	NA	425	465	1	1133	759	443	NA	87	238	175	837	431	310	314	583	270
ENSG00000117632	STMN1	protein_coding	NA	426	465.083	0	407	411	141	378	NA	219	989	995	325	615	309	443	349
ENSG00000231500	RPS18	protein_coding	NA	427	465.545	1	156	807	206	103	NA	NA	847	92	326	154	1040	703	687
ENSG00000186010	NDUFA13	protein_coding	NA	428	466.545	0	338	378	271	285	NA	NA	339	652	703	278	894	483	511
ENSG00000176340	COX8A	protein_coding	NA	429	467.091	0	184	645	325	280	NA	NA	493	223	223	516	973	571	705
ENSG00000241468	ATP5MF	protein_coding	NA	430	467.143	0	624	640	198	155	NA	NA	442	246	NA	NA	NA	NA	965
ENSG00000104964	TLE5	protein_coding	NA	431	469	0	395	630	332	376	NA	195	227	695	774	277	421	358	948
ENSG00000152377	SPOCK1	protein_coding	NA	432	470.455	4	796	392	313	NA	NA	123	1191	1287	74	68	78	88	765
ENSG00000164114	MAP9	protein_coding	NA	433	470.6	0	283	570	NA	NA	NA	NA	236	1046	218	NA	NA	NA	NA
ENSG00000185432	METTL7A	protein_coding	NA	434	472.143	2	547	990	NA	NA	NA	NA	340	678	87	37	NA	NA	626
ENSG00000171617	ENC1	protein_coding	NA	435	472.889	2	914	543	NA	NA	NA	NA	372	720	66	72	252	373	944
ENSG00000123562	MORF4L2	protein_coding	NA	436	474.909	2	313	832	288	88	NA	NA	1688	386	390	558	124	84	473
ENSG00000114391	RPL24	protein_coding	NA	437	475.545	1	202	548	542	90	NA	NA	739	167	598	400	1027	578	340
ENSG00000084731	KIF3C	protein_coding	NA	438	476.4	1	1144	803	NA	NA	NA	198	668	345	282	499	99	169	557
ENSG00000101856	PGRMC1	protein_coding	NA	439	476.917	2	299	822	237	255	NA	98	1879	595	241	323	53	458	463
ENSG00000161016	RPL8	protein_coding	NA	440	477.9	0	745	953	163	NA	NA	NA	614	472	372	241	501	524	194
ENSG00000128609	NDUFA5	protein_coding	NA	441	478.5	0	279	439	NA	NA	NA	NA	294	250	787	NA	465	644	670
ENSG00000130540	SULT4A1	protein_coding	NA	442	479.5	0	335	386	NA	NA	NA	NA	918	927	562	NA	176	312	220
ENSG00000080822	CLDND1	protein_coding	NA	443	481.7	2	1141	743	61	NA	NA	NA	267	546	119	239	764	864	73
ENSG00000092841	MYL6	protein_coding	NA	444	483.091	0	530	768	209	241	NA	NA	1027	667	405	250	459	380	378
ENSG00000198961	PJA2	protein_coding	NA	445.5	484	0	307	142	464	NA	NA	NA	621	526	853	567	436	590	334
ENSG00000104833	TUBB4A	protein_coding	NA	445.5	484	0	1813	917	233	NA	NA	209	704	197	341	244	249	193	224
ENSG00000106153	CHCHD2	protein_coding	NA	447	487.182	0	134	320	521	405	NA	NA	575	174	646	412	1104	788	280
ENSG00000110958	PTGES3	protein_coding	NA	448	487.364	0	418	554	229	220	NA	NA	1284	724	391	503	177	457	404
ENSG00000177600	RPLP2	protein_coding	NA	449	487.417	0	1227	265	359	310	NA	213	406	477	185	185	702	729	791
ENSG00000086061	DNAJA1	protein_coding	NA	450	488.167	0	571	715	NA	NA	NA	NA	285	851	NA	NA	NA	117	390
ENSG00000151490	PTPRO	protein_coding	NA	451	490	0	NA	NA	NA	NA	NA	NA	NA	490	NA	NA	NA	NA	NA
ENSG00000175416	CLTB	protein_coding	NA	452	492.222	0	696	748	NA	NA	NA	NA	852	361	247	325	282	170	749
ENSG00000203930	LINC00632	lncRNA	NA	453	493	0	1092	137	NA	NA	NA	NA	247	482	NA	507	NA	NA	NA
ENSG00000136003	ISCU	protein_coding	NA	454	494.333	0	172	460	527	NA	NA	NA	333	525	NA	NA	NA	NA	949
ENSG00000078269	SYNJ2	protein_coding	NA	455.5	497	0	NA	NA	NA	NA	NA	NA	NA	497	NA	NA	NA	NA	NA
ENSG00000187446	CHP1	protein_coding	NA	455.5	497	0	630	NA	NA	NA	NA	NA	382	479	NA	NA	NA	NA	NA
ENSG00000189241	TSPYL1	protein_coding	NA	457	497.1	1	237	99	NA	107	NA	NA	1298	1147	248	450	924	205	256
ENSG00000069329	VPS35	protein_coding	NA	458	499.7	0	585	815	378	NA	NA	NA	286	1434	250	282	504	298	165
ENSG00000185262	UBALD2	protein_coding	NA	459	500	0	NA	NA	NA	NA	NA	NA	NA	NA	500	NA	NA	NA	NA
ENSG00000090266	NDUFB2	protein_coding	NA	460	500.571	0	1095	138	241	196	NA	NA	749	310	NA	NA	NA	NA	775
ENSG00000176171	BNIP3	protein_coding	NA	461	500.857	0	321	337	315	NA	NA	NA	587	326	NA	NA	608	NA	1012
ENSG00000184076	UQCR10	protein_coding	NA	462	501.111	0	653	600	478	177	NA	NA	583	484	841	NA	405	NA	289
ENSG00000125505	MBOAT7	protein_coding	NA	463	502.333	0	512	414	NA	NA	NA	NA	678	1143	360	580	195	477	162
ENSG00000110799	VWF	protein_coding	NA	464	503.5	0	NA	NA	NA	NA	NA	NA	NA	NA	470	537	NA	NA	NA
ENSG00000100243	CYB5R3	protein_coding	NA	465	504.25	0	303	501	NA	NA	NA	NA	1166	189	631	NA	353	440	451
ENSG00000204389	HSPA1A	protein_coding	NA	466	505.714	0	800	869	242	413	NA	NA	278	324	NA	NA	NA	NA	614
ENSG00000166848	TERF2IP	protein_coding	NA	467	505.727	0	483	290	306	292	NA	NA	962	183	640	271	674	684	778
ENSG00000139112	GABARAPL1	protein_coding	NA	468	505.778	0	300	506	NA	390	NA	NA	690	394	746	NA	723	442	361
ENSG00000140988	RPS2	protein_coding	NA	469	506.182	0	847	383	266	NA	NA	117	143	1417	121	457	580	539	698
ENSG00000213024	NUP62	protein_coding	NA	470	508	0	NA	NA	NA	NA	NA	NA	NA	508	NA	NA	NA	NA	NA
ENSG00000110321	EIF4G2	protein_coding	NA	471	508.818	0	385	624	402	275	NA	NA	245	795	676	581	596	523	495
ENSG00000131100	ATP6V1E1	protein_coding	NA	472	508.909	0	227	299	252	394	NA	NA	2005	575	352	533	247	233	481
ENSG00000167641	PPP1R14A	protein_coding	NA	473	509.333	2	1919	NA	79	NA	NA	237	64	367	354	553	906	NA	105
ENSG00000185818	NAT8L	protein_coding	NA	474	509.889	0	270	593	NA	NA	NA	NA	417	671	403	379	902	555	399
ENSG00000172201	ID4	protein_coding	NA	475	510.571	1	334	495	NA	NA	NA	NA	588	1057	NA	19	949	NA	132
ENSG00000089486	CDIP1	protein_coding	NA	476	511.333	0	958	814	511	379	NA	226	524	938	525	315	237	208	501
ENSG00000164405	UQCRQ	protein_coding	NA	477	511.889	1	489	364	20	344	NA	NA	727	684	645	NA	1122	NA	212
ENSG00000130402	ACTN4	protein_coding	NA	478	512.667	0	NA	NA	NA	NA	NA	NA	NA	229	366	NA	943	NA	NA
ENSG00000165169	DYNLT3	protein_coding	NA	479	513.6	0	875	313	NA	NA	NA	NA	302	530	NA	NA	NA	NA	548
ENSG00000242808	SOX2-OT	lncRNA	NA	480	514.429	0	1446	366	NA	NA	NA	NA	201	431	580	NA	403	NA	174
ENSG00000063015	SEZ6	protein_coding	NA	481	514.444	4	741	NA	NA	NA	NA	110	93	2628	284	81	21	14	658
ENSG00000174886	NDUFA11	protein_coding	NA	482	514.5	0	603	361	482	199	NA	NA	147	585	677	NA	221	825	1045
ENSG00000170906	NDUFA3	protein_coding	NA	483	514.636	0	463	622	262	139	NA	NA	1220	648	269	440	375	548	675
ENSG00000162374	ELAVL4	protein_coding	NA	484.5	515.286	1	1155	NA	NA	NA	NA	NA	152	998	230	82	639	351	NA
ENSG00000140403	DNAJA4	protein_coding	NA	484.5	515.286	0	442	409	NA	NA	NA	NA	394	608	NA	463	263	NA	1028
ENSG00000143947	RPS27A	protein_coding	NA	486	515.923	1	163	165	176	197	98	235	1386	1748	484	512	577	806	160
ENSG00000163497	FEV	protein_coding	NA	487	516	0	NA	NA	NA	NA	NA	NA	NA	516	NA	NA	NA	NA	NA
ENSG00000131469	RPL27	protein_coding	NA	488	517	0	394	157	NA	365	NA	NA	1374	214	494	216	955	619	382
ENSG00000196876	SCN8A	protein_coding	NA	489	518	0	NA	NA	NA	NA	NA	NA	NA	518	NA	NA	NA	NA	NA
ENSG00000196227	FAM217B	protein_coding	NA	490	519	0	NA	NA	NA	NA	NA	NA	NA	519	NA	NA	NA	NA	NA
ENSG00000145284	SCD5	protein_coding	NA	491.5	519.273	1	144	331	467	64	NA	NA	1536	218	452	630	1030	650	190
ENSG00000111897	SERINC1	protein_coding	NA	491.5	519.273	0	273	221	514	397	NA	NA	438	827	311	625	697	732	677
ENSG00000171530	TBCA	protein_coding	NA	493	519.909	0	337	497	274	303	NA	NA	632	553	541	623	395	662	902
ENSG00000169213	RAB3B	protein_coding	NA	494	522.778	1	540	729	NA	NA	NA	NA	79	261	499	168	931	789	709
ENSG00000120727	PAIP2	protein_coding	NA	495	523.111	0	608	379	419	NA	NA	NA	509	824	NA	375	645	276	673
ENSG00000142669	SH3BGRL3	protein_coding	NA	496	524.6	0	342	734	260	NA	NA	NA	313	979	373	324	226	836	859
ENSG00000167283	ATP5MG	protein_coding	NA	497	525.714	0	510	829	526	104	NA	NA	703	171	NA	NA	NA	NA	837
ENSG00000180817	PPA1	protein_coding	NA	498	526.909	0	255	136	508	339	NA	NA	1669	290	585	355	423	674	562
ENSG00000159069	FBXW5	protein_coding	NA	499	527	0	NA	NA	NA	NA	NA	NA	NA	527	NA	NA	NA	NA	NA
ENSG00000173660	UQCRH	protein_coding	NA	500	527.333	1	295	339	448	164	NA	NA	953	70	NA	NA	919	720	838
ENSG00000176884	GRIN1	protein_coding	NA	501	528	0	180	557	NA	NA	NA	NA	709	302	788	575	546	608	487
ENSG00000068078	FGFR3	protein_coding	NA	502	528.25	0	863	631	NA	NA	NA	NA	198	443	281	NA	717	799	294
ENSG00000100604	CHGA	protein_coding	NA	503	528.571	1	526	573	NA	NA	NA	NA	248	908	NA	NA	355	73	1017
ENSG00000243509	TNFRSF6B	protein_coding	NA	504	530	0	NA	NA	NA	NA	NA	NA	NA	NA	781	279	NA	NA	NA
ENSG00000118181	RPS25	protein_coding	NA	505	531.091	0	747	526	481	222	NA	NA	654	144	264	176	1056	834	738
ENSG00000031698	SARS	protein_coding	NA	506	531.875	0	355	747	NA	NA	NA	NA	832	350	437	NA	816	368	350
ENSG00000145425	RPS3A	protein_coding	NA	507	532.091	0	352	295	513	272	NA	NA	2115	360	195	511	384	642	214
ENSG00000108309	RUNDC3A	protein_coding	NA	508	532.444	0	1195	775	NA	NA	NA	NA	154	437	632	270	192	147	990
ENSG00000087085	ACHE	protein_coding	NA	509	533.5	1	1125	885	NA	216	NA	NA	582	455	NA	NA	100	221	684
ENSG00000204388	HSPA1B	protein_coding	NA	510	534	0	673	NA	NA	NA	NA	NA	114	815	NA	NA	NA	NA	NA
ENSG00000163453	IGFBP7	protein_coding	NA	511	534.625	0	768	405	NA	NA	NA	NA	1271	281	258	179	883	NA	232
ENSG00000117419	ERI3	protein_coding	NA	512	535	1	968	643	NA	NA	NA	NA	230	1191	464	349	48	196	726
ENSG00000101474	APMAP	protein_coding	NA	513	536.143	0	872	949	NA	347	NA	NA	126	775	NA	NA	426	258	NA
ENSG00000115268	RPS15	protein_coding	NA	514	536.154	1	1173	359	208	153	57	207	2083	536	343	258	690	800	103
ENSG00000163682	RPL9	protein_coding	NA	515	536.455	0	220	599	327	243	NA	NA	1406	1063	115	377	658	479	414
ENSG00000256222	MTRNR2L3	protein_coding	NA	516	536.667	0	217	258	NA	NA	NA	NA	NA	NA	NA	NA	1135	NA	NA
ENSG00000151552	QDPR	protein_coding	NA	517	538.462	1	552	430	303	193	64	211	933	2070	236	571	264	343	830
ENSG00000180773	SLC36A4	protein_coding	NA	518	539	0	NA	NA	NA	NA	NA	NA	NA	539	NA	NA	NA	NA	NA
ENSG00000103260	METRN	protein_coding	NA	519	539.7	2	945	611	NA	NA	NA	175	712	424	90	89	873	496	982
ENSG00000162545	CAMK2N1	protein_coding	NA	520	540.1	0	702	809	444	121	NA	NA	698	264	594	356	1067	NA	346
ENSG00000156515	HK1	protein_coding	NA	521	540.375	0	843	234	NA	317	NA	NA	811	398	NA	NA	296	599	825
ENSG00000058668	ATP2B4	protein_coding	NA	522	541	1	746	455	NA	54	NA	NA	120	1123	NA	NA	NA	NA	748
ENSG00000074696	HACD3	protein_coding	NA	523	541.125	0	326	255	479	NA	NA	NA	907	213	NA	NA	705	407	1037
ENSG00000175130	MARCKSL1	protein_coding	NA	524	542	1	1559	169	65	NA	NA	NA	414	845	191	NA	735	NA	358
ENSG00000174748	RPL15	protein_coding	NA	525	542.917	1	262	365	395	97	NA	218	2059	181	332	336	509	745	1016
ENSG00000118705	RPN2	protein_coding	NA	526	543	0	NA	NA	NA	NA	NA	NA	NA	543	NA	NA	NA	NA	NA
ENSG00000204843	DCTN1	protein_coding	NA	527	544.143	0	577	881	NA	NA	NA	NA	595	163	NA	NA	317	366	910
ENSG00000142192	APP	protein_coding	NA	528	544.667	1	170	233	510	44	NA	149	2127	839	538	564	625	365	372
ENSG00000105696	TMEM59L	protein_coding	NA	529	544.818	0	499	1067	310	371	NA	NA	517	890	859	479	121	326	554
ENSG00000242173	ARHGDIG	protein_coding	NA	530	545.4	0	1268	NA	366	401	NA	NA	215	485	819	347	272	552	729
ENSG00000120053	GOT1	protein_coding	NA	531	546	0	553	804	115	289	NA	NA	166	1150	NA	NA	524	370	943
ENSG00000172428	COPS9	protein_coding	NA	532	546.5	1	1241	753	87	252	NA	NA	346	486	623	NA	NA	NA	584
ENSG00000132718	SYT11	protein_coding	NA	533.5	547.222	0	339	156	NA	205	NA	NA	1062	766	831	NA	864	519	183
ENSG00000174938	SEZ6L2	protein_coding	NA	533.5	547.222	0	350	338	440	NA	NA	NA	212	1305	510	NA	487	307	976
ENSG00000100234	TIMP3	protein_coding	NA	535	547.5	0	386	811	NA	NA	NA	NA	314	966	NA	NA	644	NA	164
ENSG00000182013	PNMA8A	protein_coding	NA	536	547.75	0	750	633	NA	230	NA	NA	167	1234	NA	NA	142	694	532
ENSG00000145920	CPLX2	protein_coding	NA	537	547.9	0	1090	836	222	NA	NA	NA	402	716	806	600	444	207	156
ENSG00000146701	MDH2	protein_coding	NA	538	550.143	1	471	241	NA	NA	NA	NA	189	1607	NA	NA	665	91	587
ENSG00000151376	ME3	protein_coding	NA	539	551	0	NA	NA	NA	NA	NA	NA	NA	551	NA	NA	NA	NA	NA
ENSG00000018236	CNTN1	protein_coding	NA	540	551.25	0	833	509	361	NA	NA	NA	536	687	NA	NA	532	492	460
ENSG00000077264	PAK3	protein_coding	NA	541	551.667	0	554	NA	NA	NA	NA	NA	318	783	NA	NA	NA	NA	NA
ENSG00000067064	IDI1	protein_coding	NA	542	551.833	0	494	891	NA	NA	NA	NA	572	631	NA	NA	308	415	NA
ENSG00000131016	AKAP12	protein_coding	NA	543	553.333	0	274	603	NA	NA	NA	NA	134	2088	199	306	543	187	646
ENSG00000113387	SUB1	protein_coding	NA	544	553.4	0	604	345	NA	226	NA	NA	1502	454	535	622	117	279	850
ENSG00000116675	DNAJC6	protein_coding	NA	545	554.5	0	330	522	304	NA	NA	NA	638	1077	642	443	306	521	762
ENSG00000164089	ETNPPL	protein_coding	NA	546	555.4	1	1284	352	NA	NA	NA	NA	250	794	NA	NA	NA	NA	97
ENSG00000151366	NDUFC2	protein_coding	NA	547	557.571	0	316	901	326	329	NA	NA	641	564	NA	NA	NA	NA	826
ENSG00000145730	PAM	protein_coding	NA	548	558.444	1	548	614	NA	NA	NA	NA	1221	619	400	71	198	397	958
ENSG00000104388	RAB2A	protein_coding	NA	549	558.556	0	462	658	NA	320	NA	NA	307	1290	832	NA	480	428	250
ENSG00000173757	STAT5B	protein_coding	NA	550	559	0	NA	NA	NA	NA	NA	NA	NA	559	NA	NA	NA	NA	NA
ENSG00000104327	CALB1	protein_coding	NA	551	559.333	1	NA	NA	NA	NA	NA	NA	1193	442	NA	NA	NA	NA	43
ENSG00000185813	PCYT2	protein_coding	NA	552	560.5	0	NA	NA	NA	NA	NA	NA	NA	638	NA	483	NA	NA	NA
ENSG00000183036	PCP4	protein_coding	NA	553	561	1	1229	NA	NA	NA	NA	NA	354	100	NA	NA	NA	NA	NA
ENSG00000100412	ACO2	protein_coding	NA	554	561.222	0	396	863	NA	NA	NA	NA	667	481	399	451	1072	295	427
ENSG00000189058	APOD	protein_coding	NA	555	562.2	2	2400	311	88	NA	NA	NA	54	115	886	555	537	465	211
ENSG00000139197	PEX5	protein_coding	NA	556	563	0	NA	NA	NA	NA	NA	NA	NA	NA	NA	563	NA	NA	NA
ENSG00000058404	CAMK2B	protein_coding	NA	557	563.444	0	937	672	NA	NA	NA	NA	1039	269	351	521	212	778	292
ENSG00000124507	PACSIN1	protein_coding	NA	558	563.5	0	820	469	NA	NA	NA	NA	975	291	NA	NA	NA	203	623
ENSG00000221983	UBA52	protein_coding	NA	559	565.5	1	762	812	488	151	NA	105	2063	69	235	254	749	805	293
ENSG00000125730	C3	protein_coding	NA	560	565.6	0	1480	NA	NA	NA	NA	NA	276	478	209	385	NA	NA	NA
ENSG00000186310	NAP1L3	protein_coding	NA	561	566.75	0	431	397	309	NA	NA	NA	559	930	NA	NA	952	154	802
ENSG00000103121	CMC2	protein_coding	NA	562	567	0	NA	NA	NA	NA	NA	NA	NA	567	NA	NA	NA	NA	NA
ENSG00000099624	ATP5F1D	protein_coding	NA	563	567.25	0	651	719	NA	NA	NA	NA	936	449	479	NA	328	648	328
ENSG00000154975	CA10	protein_coding	NA	564	567.5	0	NA	NA	NA	NA	NA	NA	488	647	NA	NA	NA	NA	NA
ENSG00000177383	MAGEF1	protein_coding	NA	565.5	568	0	NA	NA	NA	NA	NA	NA	NA	568	NA	NA	NA	NA	NA
ENSG00000131966	ACTR10	protein_coding	NA	565.5	568	0	979	119	NA	NA	NA	NA	895	279	NA	NA	NA	NA	NA
ENSG00000198836	OPA1	protein_coding	NA	567	568.5	0	632	NA	NA	NA	NA	NA	242	1006	NA	NA	394	NA	NA
ENSG00000116661	FBXO2	protein_coding	NA	568	570.364	0	465	242	214	108	NA	NA	1012	2054	386	384	657	444	308
ENSG00000162244	RPL29	protein_coding	NA	569	570.5	0	919	744	457	168	NA	239	1356	299	244	217	822	859	522
ENSG00000100644	HIF1A	protein_coding	NA	570	570.857	0	870	NA	NA	NA	NA	NA	NA	296	670	190	936	708	326
ENSG00000156467	UQCRB	protein_coding	NA	571	571.25	1	475	155	346	72	NA	215	1753	502	329	636	590	847	935
ENSG00000155366	RHOC	protein_coding	NA	572.5	572	0	NA	NA	NA	NA	NA	NA	NA	NA	722	422	NA	NA	NA
ENSG00000119917	IFIT3	protein_coding	NA	572.5	572	0	NA	NA	NA	NA	NA	NA	NA	NA	816	328	NA	NA	NA
ENSG00000151136	BTBD11	protein_coding	NA	574	573	0	NA	NA	NA	NA	NA	NA	NA	573	NA	NA	NA	NA	NA
ENSG00000127445	PIN1	protein_coding	NA	575	573.3	0	783	528	539	NA	NA	NA	751	1770	272	366	279	142	303
ENSG00000167614	TTYH1	protein_coding	NA	576	573.364	0	301	960	417	NA	NA	203	856	1255	448	373	523	549	422
ENSG00000007168	PAFAH1B1	protein_coding	NA	577	573.5	0	515	174	NA	NA	NA	NA	753	1341	665	NA	213	541	386
ENSG00000061918	GUCY1B1	protein_coding	NA	578	574.111	0	839	314	NA	NA	NA	NA	942	742	383	417	627	168	735
ENSG00000197111	PCBP2	protein_coding	NA	579	574.2	0	809	648	NA	411	NA	NA	1324	320	396	327	755	408	344
ENSG00000113327	GABRG2	protein_coding	NA	580	575.286	0	915	902	NA	NA	NA	NA	419	593	NA	NA	187	558	453
ENSG00000009307	CSDE1	protein_coding	NA	581	575.8	0	831	452	286	NA	NA	NA	328	1000	440	316	479	576	1050
ENSG00000070061	ELP1	protein_coding	NA	582	576	0	NA	NA	NA	NA	NA	NA	NA	576	NA	NA	NA	NA	NA
ENSG00000240694	PNMA2	protein_coding	NA	583.5	577	0	643	578	358	370	NA	NA	1109	626	NA	NA	542	688	279
ENSG00000182768	NGRN	protein_coding	NA	583.5	577	2	456	85	396	55	NA	NA	1565	614	829	488	813	528	518
ENSG00000198242	RPL23A	protein_coding	NA	585	577.455	0	488	689	387	319	NA	NA	1592	629	226	527	601	639	255
ENSG00000101335	MYL9	protein_coding	NA	586	578	0	NA	NA	NA	NA	NA	NA	NA	578	NA	NA	NA	NA	NA
ENSG00000105695	MAG	protein_coding	NA	587.5	580.25	3	1892	NA	22	NA	NA	NA	47	743	435	595	852	NA	56
ENSG00000102003	SYP	protein_coding	NA	587.5	580.25	0	245	481	NA	NA	NA	NA	512	1095	725	NA	615	793	176
ENSG00000064393	HIPK2	protein_coding	NA	589	580.5	0	811	294	NA	NA	NA	NA	191	823	897	NA	389	841	398
ENSG00000171130	ATP6V0E2	protein_coding	NA	590	581	0	707	555	349	351	NA	NA	966	286	701	556	434	699	787
ENSG00000088986	DYNLL1	protein_coding	NA	591	581.364	0	183	209	213	266	NA	NA	2152	116	785	489	820	609	553
ENSG00000151789	ZNF385D	protein_coding	NA	592	582	0	NA	NA	NA	NA	NA	NA	NA	582	NA	NA	NA	NA	NA
ENSG00000163630	SYNPR	protein_coding	NA	593	582.333	0	1255	NA	NA	NA	NA	NA	327	165	NA	NA	NA	NA	NA
ENSG00000065609	SNAP91	protein_coding	NA	594	582.5	0	437	916	414	NA	NA	NA	721	762	NA	NA	614	166	630
ENSG00000100307	CBX7	protein_coding	NA	595	583.5	0	NA	NA	NA	NA	NA	NA	533	634	NA	NA	NA	NA	NA
ENSG00000120265	PCMT1	protein_coding	NA	596	583.875	0	767	848	496	NA	NA	NA	359	1059	NA	NA	456	446	240
ENSG00000198258	UBL5	protein_coding	NA	597	584	0	1360	303	376	137	NA	NA	1090	445	NA	NA	707	126	712
ENSG00000125144	MT1G	protein_coding	NA	598	584.2	1	314	NA	166	NA	NA	NA	116	2236	NA	NA	NA	NA	89
ENSG00000127540	UQCR11	protein_coding	NA	599	584.455	0	309	791	182	214	NA	NA	1294	715	692	633	842	387	370
ENSG00000143761	ARF1	protein_coding	NA	600	584.7	0	226	529	330	NA	NA	NA	2156	340	779	576	173	300	438
ENSG00000008735	MAPK8IP2	protein_coding	NA	601	584.8	0	1397	1008	272	NA	NA	NA	589	396	699	232	646	152	457
ENSG00000057757	PITHD1	protein_coding	NA	602	585.3	0	257	895	155	128	NA	NA	826	1086	617	NA	867	280	742
ENSG00000125851	PCSK2	protein_coding	NA	603	585.5	0	822	NA	NA	NA	NA	NA	117	697	NA	NA	NA	NA	706
ENSG00000008952	SEC62	protein_coding	NA	604	586.111	0	536	590	NA	NA	NA	NA	1806	400	216	158	592	640	337
ENSG00000103769	RAB11A	protein_coding	NA	605	587.778	0	258	828	504	NA	NA	NA	1024	504	520	NA	926	345	381
ENSG00000198034	RPS4X	protein_coding	NA	606	589	0	790	816	421	244	NA	NA	1909	244	407	427	574	475	172
ENSG00000159363	ATP13A2	protein_coding	NA	607	589.286	0	579	289	NA	NA	NA	NA	924	686	NA	NA	427	474	746
ENSG00000197728	RPS26	protein_coding	NA	608	589.429	0	677	108	201	NA	NA	NA	168	1032	NA	NA	1085	NA	855
ENSG00000186468	RPS23	protein_coding	NA	609	590.154	1	267	696	468	211	72	227	996	3019	114	218	448	693	243
ENSG00000089009	RPL6	protein_coding	NA	610	590.5	1	451	582	391	67	NA	NA	890	503	810	626	1002	NA	583
ENSG00000047849	MAP4	protein_coding	NA	611	591.25	1	592	966	484	86	NA	174	730	1262	658	574	410	254	905
ENSG00000154723	ATP5PF	protein_coding	NA	612	592	0	1102	585	454	NA	NA	NA	605	216	NA	NA	891	NA	291
ENSG00000136541	ERMN	protein_coding	NA	613	592.5	1	1562	NA	NA	NA	NA	NA	132	650	320	NA	814	NA	77
ENSG00000153904	DDAH1	protein_coding	NA	614	592.857	0	802	333	NA	NA	NA	NA	202	1334	NA	NA	534	679	266
ENSG00000170889	RPS9	protein_coding	NA	615	593.5	0	913	882	352	NA	NA	NA	958	251	664	514	686	377	338
ENSG00000156411	ATP5MPL	protein_coding	NA	616	594.556	0	177	390	232	271	NA	NA	1790	344	NA	NA	637	857	653
ENSG00000188846	RPL14	protein_coding	NA	617	594.875	0	260	358	NA	NA	NA	NA	1618	312	495	462	782	NA	472
ENSG00000018189	RUFY3	protein_coding	NA	618	595	0	908	448	NA	NA	NA	NA	476	1069	560	339	402	145	1008
ENSG00000142599	RERE	protein_coding	NA	619	596	0	NA	NA	NA	NA	NA	NA	NA	596	NA	NA	NA	NA	NA
ENSG00000140319	SRP14	protein_coding	NA	620	596.182	0	142	627	350	345	NA	NA	1851	342	572	298	672	626	733
ENSG00000168066	SF1	protein_coding	NA	621	596.333	0	952	NA	NA	NA	NA	NA	141	696	NA	NA	NA	NA	NA
ENSG00000234745	HLA-B	protein_coding	NA	622	596.667	0	652	787	NA	NA	NA	NA	513	566	158	184	684	775	1051
ENSG00000035862	TIMP2	protein_coding	NA	623	598.111	0	443	663	377	NA	NA	NA	983	862	NA	491	825	420	319
ENSG00000020129	NCDN	protein_coding	NA	624	598.3	0	290	263	247	412	NA	NA	1358	1576	683	NA	140	157	857
ENSG00000117592	PRDX6	protein_coding	NA	625	598.333	0	215	721	NA	NA	NA	NA	854	233	NA	NA	1082	NA	485
ENSG00000196586	MYO6	protein_coding	NA	626	599	0	NA	NA	NA	NA	NA	NA	NA	599	NA	NA	NA	NA	NA
ENSG00000182670	TTC3	protein_coding	NA	627	601.286	0	983	248	NA	NA	NA	NA	399	338	624	641	976	NA	NA
ENSG00000160781	PAQR6	protein_coding	NA	628	602.9	1	1941	226	117	NA	NA	NA	95	1029	175	240	555	637	1014
ENSG00000188976	NOC2L	protein_coding	NA	629	604	0	NA	NA	NA	NA	NA	NA	NA	604	NA	NA	NA	NA	NA
ENSG00000179010	MRFAP1	protein_coding	NA	630	605.7	0	166	1036	228	NA	NA	NA	1526	1413	357	383	137	564	247
ENSG00000166501	PRKCB	protein_coding	NA	631	606	0	NA	NA	NA	NA	NA	NA	NA	606	NA	NA	NA	NA	NA
ENSG00000131174	COX7B	protein_coding	NA	632	606.75	0	572	859	462	350	NA	NA	1223	254	NA	NA	765	NA	369
ENSG00000101438	SLC32A1	protein_coding	NA	633	607	0	NA	NA	NA	NA	NA	NA	NA	607	NA	NA	NA	NA	NA
ENSG00000131437	KIF3A	protein_coding	NA	634	608.889	0	398	323	NA	NA	NA	NA	1207	1456	371	166	499	138	922
ENSG00000170989	S1PR1	protein_coding	NA	635	609	0	NA	NA	NA	NA	NA	NA	NA	609	NA	NA	NA	NA	NA
ENSG00000145335	SNCA	protein_coding	NA	636	609.875	0	1064	686	321	NA	NA	NA	631	178	NA	NA	488	517	994
ENSG00000156298	TSPAN7	protein_coding	NA	637	611	0	367	297	280	NA	NA	NA	1038	618	481	NA	797	661	960
ENSG00000075945	KIFAP3	protein_coding	NA	638	612.4	0	445	334	NA	169	NA	NA	238	2520	620	265	265	197	1071
ENSG00000197170	PSMD12	protein_coding	NA	639	612.667	0	623	NA	NA	NA	NA	NA	343	872	NA	NA	NA	NA	NA
ENSG00000270188	MTRNR2L11	protein_coding	NA	640	613	0	775	451	NA	NA	NA	NA	NA	NA	NA	NA	NA	NA	NA
ENSG00000106615	RHEB	protein_coding	NA	641	613.667	1	690	1048	NA	91	NA	NA	1106	741	633	NA	291	271	652
ENSG00000198825	INPP5F	protein_coding	NA	642	613.909	0	500	666	187	315	NA	NA	2073	1037	450	464	250	656	155
ENSG00000178741	COX5A	protein_coding	NA	643	614.167	0	521	407	NA	NA	NA	NA	624	352	NA	NA	1054	NA	727
ENSG00000148303	RPL7A	protein_coding	NA	644	614.545	0	779	419	367	293	NA	NA	639	1212	582	188	724	785	772
ENSG00000172115	CYCS	protein_coding	NA	645	614.667	0	629	720	NA	NA	NA	NA	317	854	NA	NA	839	NA	329
ENSG00000132824	SERINC3	protein_coding	NA	646	615.778	0	527	711	418	NA	NA	NA	1510	364	655	NA	239	632	486
ENSG00000171863	RPS7	protein_coding	NA	647	616.444	0	535	189	388	235	NA	NA	1863	489	647	502	NA	NA	700
ENSG00000139182	CLSTN3	protein_coding	NA	648	617.625	0	1783	NA	435	NA	NA	NA	290	476	482	NA	230	484	761
ENSG00000084207	GSTP1	protein_coding	NA	649	617.9	0	578	856	334	NA	NA	NA	1384	495	222	313	567	751	679
ENSG00000148660	CAMK2G	protein_coding	NA	650.5	618	0	645	792	NA	NA	NA	NA	477	558	NA	NA	NA	NA	NA
ENSG00000186469	GNG2	protein_coding	NA	650.5	618	0	460	588	NA	NA	NA	NA	796	1257	NA	NA	373	133	719
ENSG00000054793	ATP9A	protein_coding	NA	652	618.375	0	504	642	NA	NA	NA	NA	1372	309	789	NA	620	394	317
ENSG00000155368	DBI	protein_coding	NA	653	619.429	0	275	679	NA	NA	NA	NA	1234	419	800	NA	495	NA	434
ENSG00000052802	MSMO1	protein_coding	NA	654	620	0	508	312	NA	NA	NA	NA	496	1422	NA	NA	341	690	571
ENSG00000163220	S100A9	protein_coding	NA	655	621	0	NA	NA	NA	NA	NA	NA	NA	NA	NA	621	NA	NA	NA
ENSG00000100316	RPL3	protein_coding	NA	656	622	0	620	302	538	174	NA	232	1810	1405	432	145	559	629	618
ENSG00000105640	RPL18A	protein_coding	NA	657	622.909	0	409	746	529	300	NA	NA	1506	688	529	485	675	486	499
ENSG00000149273	RPS3	protein_coding	NA	658	624.889	0	982	426	NA	NA	NA	NA	1095	548	423	167	605	547	831
ENSG00000004779	NDUFAB1	protein_coding	NA	659	625	0	612	376	NA	NA	NA	NA	448	601	NA	NA	NA	NA	1088
ENSG00000250479	CHCHD10	protein_coding	NA	660	626.667	0	192	318	381	172	NA	NA	889	1620	NA	NA	393	716	959
ENSG00000111726	CMAS	protein_coding	NA	661	627.5	0	371	736	416	NA	NA	NA	569	1155	NA	NA	286	434	1053
ENSG00000168710	AHCYL1	protein_coding	NA	662.5	628	0	224	606	NA	NA	NA	NA	362	2025	715	318	622	NA	152
ENSG00000149485	FADS1	protein_coding	NA	662.5	628	0	NA	NA	NA	NA	NA	NA	NA	628	NA	NA	NA	NA	NA
ENSG00000129625	REEP5	protein_coding	NA	664.5	628.889	0	231	394	518	NA	NA	NA	686	334	557	NA	1034	848	1058
ENSG00000129682	FGF13	protein_coding	NA	664.5	628.889	2	965	1021	80	NA	NA	NA	2098	562	278	NA	18	161	477
ENSG00000126267	COX6B1	protein_coding	NA	666	629.571	0	599	463	503	403	NA	NA	1243	436	NA	NA	NA	NA	760
ENSG00000130066	SAT1	protein_coding	NA	667	629.833	0	1315	387	NA	NA	NA	NA	350	899	591	237	NA	NA	NA
ENSG00000254772	EEF1G	protein_coding	NA	668.5	630.2	0	1179	284	382	NA	NA	NA	947	405	694	607	763	559	482
ENSG00000132341	RAN	protein_coding	NA	668.5	630.2	0	374	584	528	NA	NA	NA	292	1073	852	431	810	759	599
ENSG00000204628	RACK1	protein_coding	NA	670.5	632.333	0	1920	579	NA	NA	NA	NA	469	577	166	120	736	633	491
ENSG00000119242	CCDC92	protein_coding	NA	670.5	632.333	0	829	1043	NA	NA	NA	NA	745	821	426	406	432	565	424
ENSG00000010256	UQCRC1	protein_coding	NA	672	632.571	0	828	999	NA	NA	NA	NA	246	1285	696	NA	NA	148	226
ENSG00000170345	FOS	protein_coding	NA	673	632.667	0	347	296	NA	NA	NA	NA	1793	235	639	486	NA	NA	NA
ENSG00000115306	SPTBN1	protein_coding	NA	674	632.909	0	286	943	535	323	NA	NA	1542	1049	297	288	547	531	621
ENSG00000173113	TRMT112	protein_coding	NA	675	633.75	0	563	844	506	NA	NA	NA	1604	583	NA	NA	276	122	572
ENSG00000089737	DDX24	protein_coding	NA	676	634.2	0	176	929	NA	277	NA	NA	364	1135	586	350	1049	666	810
ENSG00000173915	ATP5MD	protein_coding	NA	677	634.3	0	248	676	173	326	NA	NA	498	1466	590	NA	1113	572	681
ENSG00000185742	C11orf87	protein_coding	NA	678	635	0	NA	NA	NA	NA	NA	NA	NA	635	NA	NA	NA	NA	NA
ENSG00000102804	TSC22D1	protein_coding	NA	679	635.375	0	455	351	NA	NA	NA	NA	937	362	820	392	1131	NA	635
ENSG00000182718	ANXA2	protein_coding	NA	680	636.8	1	1121	NA	NA	NA	NA	NA	298	790	NA	NA	NA	58	917
ENSG00000100321	SYNGR1	protein_coding	NA	681	638	0	708	357	NA	NA	NA	NA	1004	598	576	NA	260	738	863
ENSG00000105088	OLFM2	protein_coding	NA	682	639.2	0	771	NA	NA	NA	NA	NA	220	1018	NA	NA	526	NA	661
ENSG00000266402	SNHG25	lncRNA	NA	683	640.4	0	1661	NA	NA	NA	NA	NA	650	374	217	300	NA	NA	NA
ENSG00000156642	NPTN	protein_coding	NA	684	640.8	0	769	256	NA	NA	NA	NA	527	737	NA	NA	NA	NA	915
ENSG00000122378	PRXL2A	protein_coding	NA	685	642.889	0	897	279	NA	NA	NA	NA	619	579	880	613	1089	594	236
ENSG00000165119	HNRNPK	protein_coding	NA	686	643.6	0	589	381	438	NA	NA	NA	1030	1041	498	219	869	721	650
ENSG00000103363	ELOB	protein_coding	NA	687	643.8	0	292	837	355	256	NA	NA	1080	1398	710	602	583	NA	325
ENSG00000163888	CAMK2N2	protein_coding	NA	688	645	0	259	766	NA	NA	NA	NA	791	139	NA	NA	999	709	852
ENSG00000133134	BEX2	protein_coding	NA	689	646.5	0	422	400	307	NA	NA	NA	956	1293	NA	NA	790	747	257
ENSG00000103035	PSMD7	protein_coding	NA	690	647	0	763	440	NA	NA	NA	NA	659	726	NA	NA	NA	NA	NA
ENSG00000019582	CD74	protein_coding	NA	691	648.833	2	505	725	NA	NA	NA	NA	1357	1223	34	49	NA	NA	NA
ENSG00000158186	MRAS	protein_coding	NA	692	649.667	0	700	NA	NA	NA	NA	NA	309	940	NA	NA	NA	NA	NA
ENSG00000116251	RPL22	protein_coding	NA	693	650.333	0	411	855	493	NA	NA	NA	1217	732	487	543	692	NA	423
ENSG00000147684	NDUFB9	protein_coding	NA	694	650.857	0	2276	530	337	393	NA	NA	439	376	NA	NA	NA	NA	205
ENSG00000180440	SERTM1	protein_coding	NA	695	651	0	NA	NA	NA	NA	NA	NA	NA	651	NA	NA	NA	NA	NA
ENSG00000113657	DPYSL3	protein_coding	NA	696	651.875	0	212	1009	NA	NA	NA	NA	1541	1222	NA	242	131	543	315
ENSG00000171450	CDK5R2	protein_coding	NA	697	652.167	0	NA	NA	NA	NA	NA	NA	1222	1175	651	448	103	314	NA
ENSG00000108312	UBTF	protein_coding	NA	698	653	0	NA	NA	NA	NA	NA	NA	NA	653	NA	NA	NA	NA	NA
ENSG00000105404	RABAC1	protein_coding	NA	699	653.5	0	591	933	525	384	NA	NA	1244	271	698	NA	623	737	529
ENSG00000008988	RPS20	protein_coding	NA	700	654.111	0	911	315	434	NA	NA	NA	1517	377	443	434	827	NA	629
ENSG00000140264	SERF2	protein_coding	NA	701	655.917	0	824	704	430	385	NA	112	775	3010	307	186	331	553	254
ENSG00000149557	FEZ1	protein_coding	NA	702	656	0	1317	979	169	NA	NA	NA	1016	418	459	481	652	783	286
ENSG00000143878	RHOB	protein_coding	NA	703	656.222	0	950	925	NA	NA	NA	NA	412	590	433	340	485	808	963
ENSG00000129757	CDKN1C	protein_coding	NA	705	657	0	NA	NA	NA	NA	NA	NA	495	819	NA	NA	NA	NA	NA
ENSG00000182481	KPNA2	protein_coding	NA	705	657	0	NA	NA	NA	NA	NA	NA	NA	657	NA	NA	NA	NA	NA
ENSG00000182220	ATP6AP2	protein_coding	NA	705	657	0	772	877	NA	NA	NA	NA	681	272	NA	NA	NA	675	665
ENSG00000123091	RNF11	protein_coding	NA	707	658	0	200	678	441	NA	NA	NA	1168	528	890	NA	799	291	927
ENSG00000149294	NCAM1	protein_coding	NA	708	658.222	0	781	168	NA	NA	NA	NA	564	1015	508	638	927	649	674
ENSG00000065518	NDUFB4	protein_coding	NA	709	659.429	0	607	706	322	340	NA	NA	1819	278	NA	NA	NA	NA	544
ENSG00000089157	RPLP0	protein_coding	NA	710	659.875	0	835	1038	NA	NA	NA	NA	752	789	369	249	551	NA	696
ENSG00000158828	PINK1	protein_coding	NA	711	660.2	0	324	883	167	279	NA	NA	1523	721	830	NA	527	467	881
ENSG00000055163	CYFIP2	protein_coding	NA	712	660.75	0	1212	340	NA	NA	NA	NA	308	1714	702	215	535	NA	260
ENSG00000125691	RPL23	protein_coding	NA	713	662.111	0	297	591	537	NA	NA	NA	2133	632	365	207	874	NA	323
ENSG00000089693	MLF2	protein_coding	NA	714	662.222	0	1126	765	412	NA	NA	NA	883	776	516	NA	635	383	464
ENSG00000182809	CRIP2	protein_coding	NA	715	663.75	0	518	NA	NA	NA	NA	NA	574	987	575	196	1038	569	853
ENSG00000158856	DMTN	protein_coding	NA	716.5	664.125	0	1375	876	NA	NA	NA	NA	172	393	822	NA	888	372	415
ENSG00000131473	ACLY	protein_coding	NA	716.5	664.125	0	1183	984	459	NA	NA	NA	151	627	NA	NA	475	392	1042
ENSG00000124422	USP22	protein_coding	NA	718	664.5	0	776	964	356	NA	NA	NA	1692	370	721	629	336	447	354
ENSG00000071553	ATP6AP1	protein_coding	NA	719	666.714	0	1275	675	NA	NA	NA	NA	291	813	NA	NA	304	671	638
ENSG00000187957	DNER	protein_coding	NA	720.5	667	0	359	465	498	NA	NA	NA	521	1326	526	NA	1142	414	752
ENSG00000107105	ELAVL2	protein_coding	NA	720.5	667	0	1442	922	NA	NA	NA	NA	194	180	NA	NA	NA	724	540
ENSG00000136810	TXN	protein_coding	NA	722	667.286	0	384	669	318	369	NA	NA	1520	658	NA	NA	NA	NA	753
ENSG00000008394	MGST1	protein_coding	NA	723	667.333	0	469	864	NA	NA	NA	NA	255	1118	NA	NA	1059	NA	239
ENSG00000132932	ATP8A2	protein_coding	NA	724	670.667	0	1016	NA	NA	NA	NA	NA	464	532	NA	NA	NA	NA	NA
ENSG00000167778	SPRYD3	protein_coding	NA	725	670.714	0	419	457	NA	NA	NA	NA	1421	999	NA	NA	514	574	311
ENSG00000070087	PFN2	protein_coding	NA	726	670.75	0	485	483	394	NA	NA	NA	436	1584	NA	NA	962	777	245
ENSG00000055208	TAB2	protein_coding	NA	727	673	0	NA	NA	NA	NA	NA	NA	NA	673	NA	NA	NA	NA	NA
ENSG00000184900	SUMO3	protein_coding	NA	728	673.111	0	902	429	NA	NA	NA	NA	940	656	695	476	743	853	364
ENSG00000187608	ISG15	protein_coding	NA	729	673.5	0	NA	NA	NA	NA	NA	NA	NA	NA	811	536	NA	NA	NA
ENSG00000132963	POMP	protein_coding	NA	730	673.667	0	1038	NA	NA	NA	NA	NA	741	242	NA	NA	NA	NA	NA
ENSG00000243449	C4orf48	protein_coding	NA	731	673.8	0	1115	795	200	312	NA	NA	1533	817	300	NA	905	333	428
ENSG00000160752	FDPS	protein_coding	NA	732.5	675	0	782	362	172	NA	NA	NA	421	2023	NA	NA	NA	NA	290
ENSG00000164929	BAALC	protein_coding	NA	732.5	675	1	243	507	NA	NA	NA	NA	253	2298	858	605	386	832	93
ENSG00000174437	ATP2A2	protein_coding	NA	734	675.125	0	361	511	NA	NA	NA	NA	1056	307	762	NA	844	802	758
ENSG00000168653	NDUFS5	protein_coding	NA	735	676.273	0	167	797	370	342	NA	NA	1661	276	713	637	1050	757	669
ENSG00000118816	CCNI	protein_coding	NA	736.5	677.6	0	602	341	NA	NA	NA	NA	1126	464	855	NA	NA	NA	NA
ENSG00000147604	RPL7	protein_coding	NA	736.5	677.6	0	534	499	523	NA	NA	NA	1452	541	579	466	647	769	766
ENSG00000149806	FAU	protein_coding	NA	738	678.455	0	195	1063	487	318	NA	NA	2042	714	302	628	550	781	383
ENSG00000105402	NAPA	protein_coding	NA	739	683.286	0	1757	NA	NA	NA	NA	NA	225	357	814	194	823	613	NA
ENSG00000143549	TPM3	protein_coding	NA	740	684	0	966	240	NA	NA	NA	NA	1740	864	295	473	866	242	470
ENSG00000124140	SLC12A5	protein_coding	NA	741	685.2	0	412	1022	NA	NA	NA	NA	1274	158	NA	NA	NA	NA	560
ENSG00000125743	SNRPD2	protein_coding	NA	742	686.286	0	458	187	NA	175	NA	NA	990	1406	NA	NA	NA	774	814
ENSG00000111912	NCOA7	protein_coding	NA	743	688.5	0	509	443	NA	NA	NA	NA	1002	843	NA	NA	1032	NA	302
ENSG00000135454	B4GALNT1	protein_coding	NA	744	689	0	NA	NA	NA	NA	NA	NA	NA	1178	NA	NA	200	NA	NA
ENSG00000143776	CDC42BPA	protein_coding	NA	745	690	0	NA	NA	NA	NA	NA	NA	NA	690	NA	NA	NA	NA	NA
ENSG00000050748	MAPK9	protein_coding	NA	747	691	0	438	604	NA	NA	NA	NA	299	2130	NA	NA	165	510	NA
ENSG00000165507	DEPP1	protein_coding	NA	747	691	0	NA	NA	NA	NA	NA	NA	NA	NA	691	NA	NA	NA	NA
ENSG00000173598	NUDT4	protein_coding	NA	747	691	1	1669	NA	NA	NA	NA	NA	NA	NA	NA	NA	388	16	NA
ENSG00000103264	FBXO31	protein_coding	NA	749	692	0	NA	NA	NA	NA	NA	NA	NA	692	NA	NA	NA	NA	NA
ENSG00000088367	EPB41L1	protein_coding	NA	750	693.111	0	149	418	NA	NA	NA	NA	260	1939	839	472	892	453	816
ENSG00000058091	CDK14	protein_coding	NA	751	694	0	901	NA	NA	NA	NA	NA	NA	487	NA	NA	NA	NA	NA
ENSG00000108387	SEPTIN4	protein_coding	NA	752	695.143	0	2159	NA	NA	NA	NA	NA	173	293	610	NA	202	749	680
ENSG00000132164	SLC6A11	protein_coding	NA	753	697.167	0	642	272	NA	NA	NA	NA	834	1208	NA	NA	730	NA	497
ENSG00000126709	IFI6	protein_coding	NA	754	697.375	2	1109	955	NA	NA	NA	NA	1429	467	48	38	882	NA	651
ENSG00000068903	SIRT2	protein_coding	NA	755	697.571	0	524	NA	164	NA	NA	NA	2034	1154	225	NA	664	NA	118
ENSG00000101290	CDS2	protein_coding	NA	756	697.75	0	714	415	NA	NA	NA	NA	405	1839	537	NA	556	551	565
ENSG00000108819	PPP1R9B	protein_coding	NA	757	700	0	NA	NA	NA	NA	NA	NA	NA	700	NA	NA	NA	NA	NA
ENSG00000185825	BCAP31	protein_coding	NA	758	700.125	0	1006	264	NA	NA	NA	NA	2147	435	477	NA	217	439	616
ENSG00000198689	SLC9A6	protein_coding	NA	759	700.167	0	542	188	NA	NA	NA	NA	1762	973	NA	NA	553	183	NA
ENSG00000128524	ATP6V1F	protein_coding	NA	760	702.7	0	1071	317	293	406	NA	NA	1185	1943	566	NA	378	302	566
ENSG00000198911	SREBF2	protein_coding	NA	761	702.833	0	1002	478	NA	NA	NA	NA	665	982	NA	NA	412	678	NA
ENSG00000129538	RNASE1	protein_coding	NA	762	703	0	1512	NA	NA	NA	NA	NA	128	611	583	NA	770	839	478
ENSG00000125971	DYNLRB1	protein_coding	NA	763	703.182	0	543	987	533	307	NA	NA	363	2104	596	601	536	409	756
ENSG00000135709	KIAA0513	protein_coding	NA	764	703.25	0	764	737	NA	NA	NA	NA	197	1115	NA	NA	NA	NA	NA
ENSG00000112096	SOD2	protein_coding	NA	765	703.3	0	484	618	392	NA	NA	NA	1258	1863	737	280	482	556	363
ENSG00000011465	DCN	protein_coding	NA	766	703.5	0	NA	NA	NA	NA	NA	NA	451	956	NA	NA	NA	NA	NA
ENSG00000100991	TRPC4AP	protein_coding	NA	767	704	0	NA	NA	NA	NA	NA	NA	NA	704	NA	NA	NA	NA	NA
ENSG00000182899	RPL35A	protein_coding	NA	768	704.455	0	241	946	423	278	NA	NA	1187	2245	491	177	688	760	313
ENSG00000175582	RAB6A	protein_coding	NA	769	705.125	0	729	656	522	NA	NA	NA	1681	203	NA	NA	572	568	710
ENSG00000161970	RPL26	protein_coding	NA	770	705.7	0	424	520	168	217	NA	NA	821	2287	673	634	819	NA	494
ENSG00000099622	CIRBP	protein_coding	NA	771	706.778	0	498	620	NA	NA	NA	NA	1672	122	764	545	957	831	352
ENSG00000077782	FGFR1	protein_coding	NA	772.5	708	0	1689	NA	NA	NA	NA	NA	408	462	NA	NA	478	NA	503
ENSG00000181852	RNF41	protein_coding	NA	772.5	708	0	NA	NA	NA	NA	NA	NA	NA	708	NA	NA	NA	NA	NA
ENSG00000263001	GTF2I	protein_coding	NA	774	708.091	0	213	508	465	NA	NA	222	2041	2340	347	332	719	344	258
ENSG00000107281	NPDC1	protein_coding	NA	775	708.222	0	1063	486	NA	287	NA	NA	1667	1220	327	NA	289	429	606
ENSG00000181061	HIGD1A	protein_coding	NA	776	708.4	0	825	558	461	251	NA	NA	1469	1138	513	NA	966	391	512
ENSG00000171603	CLSTN1	protein_coding	NA	777	708.7	1	293	587	NA	53	NA	NA	866	2107	506	616	490	526	1043
ENSG00000021645	NRXN3	protein_coding	NA	778	708.8	0	1034	709	NA	NA	NA	NA	1143	226	NA	NA	NA	432	NA
ENSG00000179091	CYC1	protein_coding	NA	779	709.25	0	1117	683	NA	NA	NA	NA	301	736	NA	NA	NA	NA	NA
ENSG00000054690	PLEKHH1	protein_coding	NA	780	709.5	0	NA	NA	NA	NA	NA	NA	913	506	NA	NA	NA	NA	NA
ENSG00000109046	WSB1	protein_coding	NA	781	710	0	NA	NA	NA	NA	NA	NA	NA	710	NA	NA	NA	NA	NA
ENSG00000184113	CLDN5	protein_coding	NA	782	710.5	0	NA	NA	NA	NA	NA	NA	NA	1166	731	223	564	653	926
ENSG00000141522	ARHGDIA	protein_coding	NA	783	710.556	0	1611	951	NA	NA	NA	NA	487	1747	348	346	179	277	449
ENSG00000082641	NFE2L1	protein_coding	NA	784	710.778	0	893	723	NA	NA	NA	NA	793	712	887	432	807	462	688
ENSG00000166313	APBB1	protein_coding	NA	785	711.182	0	787	182	519	288	NA	NA	1978	723	763	614	359	535	1075
ENSG00000182774	RPS17	protein_coding	NA	786	711.5	0	1009	835	413	NA	NA	NA	397	1805	143	531	594	570	818
ENSG00000105193	RPS16	protein_coding	NA	787	712	0	1721	505	449	415	NA	NA	998	592	754	386	878	427	707
ENSG00000154146	NRGN	protein_coding	NA	788	712.5	0	NA	NA	NA	NA	NA	NA	NA	1083	NA	NA	NA	NA	342
ENSG00000122406	RPL5	protein_coding	NA	789	712.9	0	520	424	485	NA	NA	NA	1847	440	657	334	1115	437	870
ENSG00000054523	KIF1B	protein_coding	NA	791	713	0	304	371	474	NA	NA	NA	1354	1669	792	391	640	830	305
ENSG00000181195	PENK	protein_coding	NA	791	713	0	981	NA	NA	NA	NA	NA	891	267	NA	NA	NA	NA	NA
ENSG00000135049	AGTPBP1	protein_coding	NA	791	713	0	NA	NA	NA	NA	NA	NA	NA	713	NA	NA	NA	NA	NA
ENSG00000118785	SPP1	protein_coding	NA	793	713.444	4	1785	492	30	NA	NA	NA	49	3145	46	103	708	NA	63
ENSG00000166925	TSC22D4	protein_coding	NA	794	714.4	0	405	1049	515	NA	NA	NA	1624	1205	201	296	700	586	563
ENSG00000078668	VDAC3	protein_coding	NA	795	714.889	1	377	944	296	84	NA	NA	862	2186	NA	NA	442	264	979
ENSG00000103145	HCFC1R1	protein_coding	NA	796	715.6	0	765	919	407	338	NA	NA	195	2290	597	NA	354	293	998
ENSG00000144381	HSPD1	protein_coding	NA	797	715.889	1	441	75	NA	NA	NA	NA	1499	1458	460	517	430	668	895
ENSG00000186462	NAP1L2	protein_coding	NA	798	716	0	650	865	NA	NA	NA	NA	330	760	NA	NA	NA	NA	975
ENSG00000108518	PFN1	protein_coding	NA	799	716.778	0	1023	220	NA	NA	NA	NA	1507	1136	363	578	362	515	747
ENSG00000155097	ATP6V1C1	protein_coding	NA	800	717.286	0	1435	143	NA	NA	NA	NA	1159	894	NA	NA	199	297	894
ENSG00000138757	G3BP2	protein_coding	NA	801	717.889	0	567	482	210	335	NA	NA	651	2368	NA	NA	280	636	932
ENSG00000115902	SLC1A4	protein_coding	NA	802	719	0	1701	502	NA	NA	NA	NA	1142	295	NA	NA	417	257	NA
ENSG00000143198	MGST3	protein_coding	NA	803	720	1	816	887	282	83	NA	NA	1789	1145	NA	NA	494	149	835
ENSG00000174444	RPL4	protein_coding	NA	804	720.4	1	687	634	53	NA	NA	NA	538	3098	444	203	484	667	396
ENSG00000079459	FDFT1	protein_coding	NA	805	720.857	0	416	565	NA	NA	NA	NA	422	1453	NA	NA	792	773	625
ENSG00000130731	METTL26	protein_coding	NA	806	721	0	721	NA	NA	NA	NA	NA	NA	NA	NA	NA	NA	NA	NA
ENSG00000104419	NDRG1	protein_coding	NA	807	721.125	0	1552	NA	NA	NA	NA	NA	581	818	257	251	789	525	996
ENSG00000007516	BAIAP3	protein_coding	NA	808	721.143	0	792	684	NA	NA	NA	NA	226	1686	NA	NA	673	143	844
ENSG00000137154	RPS6	protein_coding	NA	809	721.667	0	1098	363	183	165	NA	128	694	2758	488	542	817	315	1109
ENSG00000096092	TMEM14A	protein_coding	NA	810	721.833	0	1286	681	NA	NA	NA	NA	504	1011	NA	NA	659	190	NA
ENSG00000113648	H2AFY	protein_coding	NA	811	724	0	892	NA	NA	NA	NA	NA	500	780	NA	NA	NA	NA	NA
ENSG00000100427	MLC1	protein_coding	NA	812	724.429	2	1280	NA	NA	NA	NA	NA	685	2317	58	80	428	NA	223
ENSG00000157152	SYN2	protein_coding	NA	813	724.625	0	733	808	NA	NA	NA	NA	1219	371	794	NA	600	292	980
ENSG00000184905	TCEAL2	protein_coding	NA	814	724.8	0	905	740	NA	NA	NA	NA	810	389	NA	NA	780	NA	NA
ENSG00000054118	THRAP3	protein_coding	NA	815	725	0	NA	NA	NA	NA	NA	NA	NA	725	NA	NA	NA	NA	NA
ENSG00000064787	BCAS1	protein_coding	NA	816	726.778	1	757	793	NA	NA	NA	NA	39	1993	256	522	447	645	1089
ENSG00000130522	JUND	protein_coding	NA	817	728.778	0	928	931	NA	NA	NA	NA	1827	792	129	156	833	308	655
ENSG00000232112	TMA7	protein_coding	NA	818	730.455	0	140	466	363	212	NA	NA	1336	2715	688	594	470	710	341
ENSG00000145494	NDUFS6	protein_coding	NA	819	730.6	0	523	617	NA	NA	NA	NA	719	791	NA	NA	1003	NA	NA
ENSG00000159377	PSMB4	protein_coding	NA	820	731.833	0	387	525	437	NA	NA	NA	1020	1148	NA	NA	NA	NA	874
ENSG00000172301	COPRS	protein_coding	NA	821	733.111	0	1019	873	406	NA	NA	NA	483	1800	524	NA	498	327	668
ENSG00000198794	SCAMP5	protein_coding	NA	822	734	0	845	235	NA	NA	NA	NA	1840	861	548	561	651	421	644
ENSG00000255690	TRIL	protein_coding	NA	823	734.4	0	883	NA	NA	NA	NA	NA	190	1109	NA	NA	1024	NA	466
ENSG00000153820	SPHKAP	protein_coding	NA	824.5	735	0	NA	NA	NA	NA	NA	NA	NA	735	NA	NA	NA	NA	NA
ENSG00000135541	AHI1	protein_coding	NA	824.5	735	0	NA	NA	NA	NA	NA	NA	570	900	NA	NA	NA	NA	NA
ENSG00000134287	ARF3	protein_coding	NA	826	737.667	0	282	670	NA	NA	NA	NA	2159	438	869	589	598	575	459
ENSG00000102882	MAPK3	protein_coding	NA	827	737.714	0	1461	NA	NA	NA	NA	NA	1105	369	705	NA	576	294	654
ENSG00000160408	ST6GALNAC6	protein_coding	NA	828	738	0	1060	NA	NA	NA	NA	NA	NA	NA	NA	NA	468	686	NA
ENSG00000078369	GNB1	protein_coding	NA	829	738.1	0	278	416	451	NA	NA	NA	2054	446	709	441	758	821	1007
ENSG00000168077	SCARA3	protein_coding	NA	830	738.5	0	NA	NA	NA	NA	NA	NA	897	580	NA	NA	NA	NA	NA
ENSG00000114353	GNAI2	protein_coding	NA	831	739.111	0	628	1037	NA	NA	NA	NA	1082	378	660	263	830	722	1052
ENSG00000069275	NUCKS1	protein_coding	NA	832	741.222	0	1391	794	NA	NA	NA	NA	1426	145	547	289	747	865	467
ENSG00000171223	JUNB	protein_coding	NA	833	741.333	0	NA	NA	NA	NA	NA	NA	NA	885	780	559	NA	NA	NA
ENSG00000185551	NR2F2	protein_coding	NA	834	742	0	NA	NA	NA	NA	NA	NA	801	683	NA	NA	NA	NA	NA
ENSG00000172354	GNB2	protein_coding	NA	835	742.143	0	964	NA	NA	NA	NA	NA	385	1647	679	484	740	296	NA
ENSG00000107902	LHPP	protein_coding	NA	836	742.714	0	1792	NA	143	NA	NA	NA	750	781	424	NA	1107	NA	202
ENSG00000053438	NNAT	protein_coding	NA	837	743	2	NA	NA	NA	NA	NA	NA	NA	2796	17	10	NA	NA	149
ENSG00000069849	ATP1B3	protein_coding	NA	838	744.167	0	693	685	NA	NA	NA	NA	804	1030	NA	NA	1116	137	NA
ENSG00000128335	APOL2	protein_coding	NA	839	744.5	0	NA	NA	NA	NA	NA	NA	1347	537	889	NA	205	NA	NA
ENSG00000068697	LAPTM4A	protein_coding	NA	840.5	745	0	657	377	NA	NA	NA	NA	1585	411	NA	NA	NA	NA	695
ENSG00000170142	UBE2E1	protein_coding	NA	840.5	745	0	NA	NA	NA	NA	NA	NA	1069	421	NA	NA	NA	NA	NA
ENSG00000138095	LRPPRC	protein_coding	NA	842	746.333	0	663	NA	NA	NA	NA	NA	310	1266	NA	NA	NA	NA	NA
ENSG00000042753	AP2S1	protein_coding	NA	843	748	0	725	784	502	NA	NA	NA	455	2222	769	331	339	563	790
ENSG00000168490	PHYHIP	protein_coding	NA	844	748.571	0	754	NA	NA	NA	NA	NA	672	986	771	NA	529	796	732
ENSG00000108298	RPL19	protein_coding	NA	845	748.909	0	583	300	362	124	NA	NA	2019	1744	462	230	739	723	952
ENSG00000241343	RPL36A	protein_coding	NA	846	751.5	0	1203	751	433	391	NA	NA	1695	831	614	303	778	NA	516
ENSG00000130725	UBE2M	protein_coding	NA	847	753.333	0	785	991	NA	NA	NA	NA	1794	633	522	442	558	396	659
ENSG00000245870	LINC00682	lncRNA	NA	848.5	753.5	0	1186	NA	NA	NA	NA	NA	NA	321	NA	NA	NA	NA	NA
ENSG00000112697	TMEM30A	protein_coding	NA	848.5	753.5	0	400	972	NA	NA	NA	NA	1065	534	NA	NA	541	NA	1009
ENSG00000088832	FKBP1A	protein_coding	NA	850	754	0	1035	NA	NA	NA	NA	NA	914	305	NA	NA	1061	455	NA
ENSG00000063177	RPL18	protein_coding	NA	851	754.083	0	726	823	401	341	113	NA	1750	2433	380	247	712	673	450
ENSG00000152910	CNTNAP4	protein_coding	NA	852	754.5	0	NA	NA	NA	NA	NA	NA	443	1066	NA	NA	NA	NA	NA
ENSG00000122824	NUDT10	protein_coding	NA	853	755	0	NA	NA	NA	NA	NA	NA	NA	755	NA	NA	NA	NA	NA
ENSG00000113712	CSNK1A1	protein_coding	NA	854	755.6	0	954	830	NA	NA	NA	NA	534	1038	422	NA	NA	NA	NA
ENSG00000168028	RPSA	protein_coding	NA	855	755.8	0	1465	183	429	NA	NA	NA	1776	488	384	369	860	837	767
ENSG00000013293	SLC7A14	protein_coding	NA	856.5	756	0	1164	NA	NA	NA	NA	NA	972	731	NA	NA	340	573	NA
ENSG00000130226	DPP6	protein_coding	NA	856.5	756	0	1424	454	NA	NA	NA	NA	642	1012	607	NA	753	NA	400
ENSG00000100167	SEPTIN3	protein_coding	NA	858	756.2	0	941	NA	NA	NA	NA	NA	556	676	NA	NA	748	NA	860
ENSG00000172270	BSG	protein_coding	NA	859	757.5	0	1386	NA	NA	NA	NA	NA	1693	416	208	319	416	809	813
ENSG00000255302	EID1	protein_coding	NA	860	758.25	0	356	613	NA	NA	NA	NA	1495	958	883	445	861	NA	455
ENSG00000105372	RPS19	protein_coding	NA	861	758.818	0	818	521	298	324	NA	NA	596	2972	163	255	520	849	1031
ENSG00000132507	EIF5A	protein_coding	NA	862.5	761	0	679	NA	NA	NA	NA	NA	779	1190	NA	NA	804	353	NA
ENSG00000104969	SGTA	protein_coding	NA	862.5	761	0	NA	NA	NA	NA	NA	NA	NA	761	NA	NA	NA	NA	NA
ENSG00000118680	MYL12B	protein_coding	NA	864	761.167	0	930	786	NA	NA	NA	NA	755	591	NA	NA	554	NA	951
ENSG00000169862	CTNND2	protein_coding	NA	865	762.857	0	327	652	NA	NA	NA	NA	1559	820	856	NA	1020	NA	106
ENSG00000185896	LAMP1	protein_coding	NA	866	762.875	0	618	420	NA	NA	NA	NA	812	1666	720	NA	597	669	601
ENSG00000171033	PKIA	protein_coding	NA	867.5	763	1	1258	970	NA	NA	NA	NA	1481	365	NA	NA	461	43	NA
ENSG00000176485	PLAAT3	protein_coding	NA	867.5	763	0	1679	NA	NA	NA	NA	NA	277	333	NA	NA	NA	NA	NA
ENSG00000120306	CYSTM1	protein_coding	NA	869	764	0	1449	NA	NA	NA	NA	NA	1211	401	NA	NA	493	266	NA
ENSG00000132670	PTPRA	protein_coding	NA	870	764.444	0	582	561	NA	NA	NA	NA	874	2445	319	181	549	500	869
ENSG00000104695	PPP2CB	protein_coding	NA	871.5	764.5	0	1812	403	211	NA	NA	NA	1370	1258	397	266	1076	426	426
ENSG00000211450	SELENOH	protein_coding	NA	871.5	764.5	0	480	243	NA	NA	NA	NA	1710	1237	486	NA	431	NA	NA
ENSG00000134779	TPGS2	protein_coding	NA	873	765.143	0	1082	278	NA	NA	NA	NA	906	974	NA	NA	519	643	954
ENSG00000161960	EIF4A1	protein_coding	NA	874	767.125	0	879	911	NA	NA	NA	NA	145	1892	496	272	613	NA	929
ENSG00000178695	KCTD12	protein_coding	NA	875	767.5	0	NA	NA	NA	NA	NA	NA	786	749	NA	NA	NA	NA	NA
ENSG00000160209	PDXK	protein_coding	NA	876	768	0	434	412	NA	NA	NA	NA	1201	644	808	NA	954	611	1080
ENSG00000136531	SCN2A	protein_coding	NA	877	769.2	0	370	NA	NA	NA	NA	NA	1791	306	246	NA	1133	NA	NA
ENSG00000138834	MAPK8IP3	protein_coding	NA	878	770.286	0	1267	NA	NA	NA	NA	NA	760	1537	686	475	161	506	NA
ENSG00000083845	RPS5	protein_coding	NA	879	770.3	0	799	577	409	NA	NA	NA	1900	465	468	585	836	677	987
ENSG00000100994	PYGB	protein_coding	NA	880	771.375	0	691	NA	NA	NA	NA	NA	1355	1028	714	573	409	624	777
ENSG00000123240	OPTN	protein_coding	NA	881	771.714	1	938	192	NA	NA	NA	NA	1578	643	NA	NA	1041	89	921
ENSG00000101347	SAMHD1	protein_coding	NA	882	772	0	NA	NA	NA	NA	NA	NA	NA	NA	772	NA	NA	NA	NA
ENSG00000182600	SNORC	protein_coding	NA	883	772.167	1	2259	NA	NA	NA	NA	NA	573	758	145	94	NA	NA	804
ENSG00000166598	HSP90B1	protein_coding	NA	884	772.333	0	287	574	439	NA	NA	NA	1802	316	661	NA	1009	861	1002
ENSG00000204851	PNMA8B	protein_coding	NA	885	772.5	0	837	393	NA	NA	NA	NA	349	2742	622	NA	367	399	471
ENSG00000125827	TMX4	protein_coding	NA	886	774.125	1	446	367	NA	NA	NA	NA	393	3144	602	79	607	NA	555
ENSG00000126351	THRA	protein_coding	NA	887	774.375	0	753	866	NA	NA	NA	NA	1992	319	242	283	901	NA	839
ENSG00000189403	HMGB1	protein_coding	NA	888	774.444	0	899	757	NA	NA	NA	NA	1632	1162	243	411	693	562	611
ENSG00000183011	NAA38	protein_coding	NA	889	774.5	1	862	934	83	NA	NA	NA	687	1749	NA	NA	NA	NA	332
ENSG00000230989	HSBP1	protein_coding	NA	890	775.625	0	669	928	NA	NA	NA	NA	1393	809	NA	468	512	405	1021
ENSG00000067560	RHOA	protein_coding	NA	891	776	0	2002	802	NA	NA	NA	NA	203	1519	202	180	720	364	992
ENSG00000142089	IFITM3	protein_coding	NA	892	777.571	1	1980	NA	NA	NA	NA	NA	657	784	105	98	935	NA	884
ENSG00000110076	NRXN2	protein_coding	NA	893.5	778.333	0	594	973	NA	NA	NA	NA	723	2201	851	526	278	303	556
ENSG00000137486	ARRB1	protein_coding	NA	893.5	778.333	0	1491	NA	NA	NA	NA	NA	204	640	NA	NA	NA	NA	NA
ENSG00000163466	ARPC2	protein_coding	NA	895	780.667	0	635	NA	NA	NA	NA	NA	706	1001	NA	NA	NA	NA	NA
ENSG00000144567	RETREG2	protein_coding	NA	896	781.286	0	1509	382	NA	NA	NA	NA	261	664	NA	NA	1033	588	1032
ENSG00000171533	MAP6	protein_coding	NA	897	781.667	0	924	778	NA	NA	NA	NA	1087	751	NA	NA	380	770	NA
ENSG00000013297	CLDN11	protein_coding	NA	898	783.833	1	2043	NA	NA	NA	NA	NA	67	500	NA	NA	1005	807	281
ENSG00000166922	SCG5	protein_coding	NA	899	784	0	633	490	NA	NA	NA	NA	921	915	NA	NA	NA	NA	961
ENSG00000135486	HNRNPA1	protein_coding	NA	900	784.875	0	671	707	NA	NA	NA	NA	2026	670	599	515	806	NA	285
ENSG00000172508	CARNS1	protein_coding	NA	901	785.5	1	NA	NA	NA	NA	NA	NA	32	2411	178	NA	521	NA	NA
ENSG00000115504	EHBP1	protein_coding	NA	902.5	787	0	NA	NA	NA	NA	NA	NA	NA	787	NA	NA	NA	NA	NA
ENSG00000187189	TSPYL4	protein_coding	NA	902.5	787	0	570	213	NA	NA	NA	NA	748	1804	NA	NA	887	416	871
ENSG00000070756	PABPC1	protein_coding	NA	904	787.4	0	2017	NA	NA	NA	NA	NA	955	397	179	389	NA	NA	NA
ENSG00000160310	PRMT2	protein_coding	NA	905	791.375	0	1027	906	NA	NA	NA	NA	980	959	286	NA	921	375	877
ENSG00000213639	PPP1CB	protein_coding	NA	906	791.571	0	793	889	NA	NA	NA	NA	728	841	700	NA	679	NA	911
ENSG00000082898	XPO1	protein_coding	NA	907.5	793	0	NA	NA	NA	NA	NA	NA	NA	793	NA	NA	NA	NA	NA
ENSG00000089818	NECAP1	protein_coding	NA	907.5	793	0	597	612	NA	NA	NA	NA	370	1840	NA	NA	NA	NA	546
ENSG00000221946	FXYD7	protein_coding	NA	909	793.8	0	728	NA	NA	NA	NA	NA	1074	1263	NA	NA	497	NA	407
ENSG00000165280	VCP	protein_coding	NA	910	794.25	0	1257	954	540	NA	NA	NA	1252	385	NA	NA	630	325	1011
ENSG00000197106	SLC6A17	protein_coding	NA	911	794.6	0	491	NA	NA	NA	NA	NA	1387	744	NA	NA	333	NA	1018
ENSG00000119707	RBM25	protein_coding	NA	912	795.333	0	NA	NA	NA	NA	NA	NA	NA	1163	790	433	NA	NA	NA
ENSG00000175166	PSMD2	protein_coding	NA	913	796.125	0	627	515	NA	NA	NA	NA	1690	1279	837	NA	779	194	448
ENSG00000170500	LONRF2	protein_coding	NA	914	796.375	0	658	989	NA	NA	NA	NA	229	1881	734	NA	853	386	641
ENSG00000171735	CAMTA1	protein_coding	NA	915	796.4	0	343	145	NA	NA	NA	NA	1295	1402	NA	NA	NA	NA	797
ENSG00000103266	STUB1	protein_coding	NA	916	797.167	0	832	988	NA	NA	NA	NA	880	1088	NA	NA	757	NA	238
ENSG00000241837	ATP5PO	protein_coding	NA	917	797.5	0	615	935	NA	208	NA	NA	1854	471	NA	NA	NA	NA	702
ENSG00000147123	NDUFB11	protein_coding	NA	918	798.2	0	1146	621	NA	NA	NA	NA	792	835	NA	NA	NA	NA	597
ENSG00000148180	GSN	protein_coding	NA	919	798.286	0	1504	NA	123	NA	NA	NA	426	1553	569	294	1119	NA	NA
ENSG00000197747	S100A10	protein_coding	NA	920	798.857	0	2075	NA	NA	232	NA	NA	699	655	314	NA	877	740	NA
ENSG00000113013	HSPA9	protein_coding	NA	921	800.556	0	654	659	NA	NA	NA	NA	1189	981	768	523	663	822	946
ENSG00000153774	CFDP1	protein_coding	NA	922	801	0	801	NA	NA	NA	NA	NA	NA	NA	NA	NA	NA	NA	NA
ENSG00000198832	SELENOM	protein_coding	NA	923	801.429	0	727	761	NA	NA	NA	NA	734	1149	616	NA	1096	NA	527
ENSG00000085662	AKR1B1	protein_coding	NA	924	802.25	0	580	197	NA	NA	NA	NA	662	3132	294	NA	538	256	759
ENSG00000182836	PLCXD3	protein_coding	NA	925	802.4	0	2018	NA	NA	NA	NA	NA	615	456	NA	NA	433	490	NA
ENSG00000061676	NCKAP1	protein_coding	NA	926	802.714	0	1107	818	NA	NA	NA	NA	1424	410	NA	NA	418	473	969
ENSG00000136888	ATP6V1G1	protein_coding	NA	927	803.25	0	900	841	NA	233	NA	NA	2120	1380	388	NA	182	382	NA
ENSG00000197444	OGDHL	protein_coding	NA	928	803.333	0	920	641	NA	NA	NA	NA	272	1409	NA	NA	951	NA	627
ENSG00000120738	EGR1	protein_coding	NA	929.5	803.667	0	NA	NA	NA	NA	NA	NA	133	1970	NA	308	NA	NA	NA
ENSG00000175602	CCDC85B	protein_coding	NA	929.5	803.667	0	1106	564	NA	404	NA	NA	1110	920	815	NA	726	779	809
ENSG00000159202	UBE2Z	protein_coding	NA	931	804.5	1	989	NA	NA	NA	NA	NA	1036	1451	739	518	NA	94	NA
ENSG00000163644	PPM1K	protein_coding	NA	932.5	804.6	0	808	NA	NA	NA	NA	NA	1467	531	778	439	NA	NA	NA
ENSG00000128989	ARPP19	protein_coding	NA	932.5	804.6	0	1620	845	399	NA	NA	NA	1820	1478	395	454	271	324	440
ENSG00000149269	PAK1	protein_coding	NA	934	808	0	1110	NA	NA	NA	NA	NA	592	722	NA	NA	NA	NA	NA
ENSG00000150787	PTS	protein_coding	NA	935	809.333	0	770	NA	NA	NA	NA	NA	347	1311	NA	NA	NA	NA	NA
ENSG00000026025	VIM	protein_coding	NA	936	810.25	2	NA	NA	NA	NA	NA	NA	NA	1927	95	87	1132	NA	NA
ENSG00000184368	MAP7D2	protein_coding	NA	937	810.429	0	850	276	NA	NA	NA	NA	537	2355	196	NA	NA	742	717
ENSG00000101400	SNTA1	protein_coding	NA	938	811.286	0	2068	NA	NA	NA	NA	NA	868	779	228	144	1022	NA	570
ENSG00000167792	NDUFV1	protein_coding	NA	939	811.429	0	834	813	NA	NA	NA	NA	222	1523	826	NA	868	NA	594
ENSG00000143742	SRP9	protein_coding	NA	940	811.714	0	648	653	NA	NA	NA	NA	473	2188	378	NA	648	NA	694
ENSG00000117152	RGS4	protein_coding	NA	941	812.5	0	NA	NA	NA	NA	NA	NA	1233	392	NA	NA	NA	NA	NA
ENSG00000134419	RPS15A	protein_coding	NA	942	812.889	0	665	1039	130	NA	NA	NA	2148	332	728	459	858	NA	957
ENSG00000112335	SNX3	protein_coding	NA	943	813.125	0	807	992	273	NA	NA	NA	519	1828	NA	NA	660	850	576
ENSG00000158985	CDC42SE2	protein_coding	NA	944	814	0	NA	NA	NA	NA	NA	NA	NA	858	770	NA	NA	NA	NA
ENSG00000116857	TMEM9	protein_coding	NA	945	814.429	0	864	269	NA	NA	NA	NA	1552	1269	NA	NA	474	385	888
ENSG00000089250	NOS1	protein_coding	NA	946	814.5	0	NA	NA	NA	NA	NA	NA	323	1306	NA	NA	NA	NA	NA
ENSG00000124920	MYRF	protein_coding	NA	947	815	0	NA	NA	NA	NA	NA	NA	724	906	NA	NA	NA	NA	NA
ENSG00000173726	TOMM20	protein_coding	NA	949	816	0	584	755	300	NA	NA	NA	1463	1813	868	NA	419	755	387
ENSG00000196821	ILRUN	protein_coding	NA	949	816	0	NA	NA	NA	NA	NA	NA	NA	816	NA	NA	NA	NA	NA
ENSG00000120694	HSPH1	protein_coding	NA	949	816	0	388	738	NA	NA	NA	NA	1880	699	NA	NA	312	NA	879
ENSG00000105854	PON2	protein_coding	NA	951	816.4	0	574	NA	NA	NA	NA	NA	1150	694	895	NA	769	NA	NA
ENSG00000108561	C1QBP	protein_coding	NA	952	817	0	413	626	NA	NA	NA	NA	NA	1412	NA	NA	NA	NA	NA
ENSG00000105701	FKBP8	protein_coding	NA	953	818.143	0	795	NA	NA	NA	NA	NA	692	1344	750	606	1138	NA	402
ENSG00000139190	VAMP1	protein_coding	NA	954	818.6	0	803	538	NA	NA	NA	NA	413	1722	NA	NA	NA	NA	617
ENSG00000245910	SNHG6	lncRNA	NA	955	819.111	0	1847	956	536	NA	NA	NA	387	1067	478	631	798	NA	672
ENSG00000143772	ITPKB	protein_coding	NA	956	819.333	0	1658	NA	NA	NA	NA	NA	1311	882	221	143	701	NA	NA
ENSG00000078549	ADCYAP1R1	protein_coding	NA	957	820	0	1226	660	NA	NA	NA	NA	440	925	813	NA	856	NA	NA
ENSG00000149925	ALDOA	protein_coding	NA	958	820.4	0	1338	NA	NA	209	NA	NA	609	889	NA	NA	NA	NA	1057
ENSG00000102241	HTATSF1	protein_coding	NA	959	820.5	0	692	NA	NA	NA	NA	NA	NA	949	NA	NA	NA	NA	NA
ENSG00000213760	ATP6V1G2	protein_coding	NA	960	821.4	0	789	861	NA	NA	NA	NA	606	764	NA	NA	NA	NA	1087
ENSG00000221823	PPP3R1	protein_coding	NA	961	823.667	0	929	NA	NA	NA	NA	NA	585	957	NA	NA	NA	NA	NA
ENSG00000182534	MXRA7	protein_coding	NA	962	825.5	0	2092	718	NA	NA	NA	NA	119	1132	558	NA	800	812	373
ENSG00000174460	ZCCHC12	protein_coding	NA	963	825.833	0	1219	343	NA	NA	NA	NA	1368	480	742	NA	NA	NA	803
ENSG00000183723	CMTM4	protein_coding	NA	964	826	0	NA	NA	NA	NA	NA	NA	NA	826	NA	NA	NA	NA	NA
ENSG00000197958	RPL12	protein_coding	NA	965	826.444	0	1259	535	534	NA	NA	NA	1733	383	678	504	793	NA	1019
ENSG00000066468	FGFR2	protein_coding	NA	966	827	0	NA	NA	NA	NA	NA	NA	1107	547	NA	NA	NA	NA	NA
ENSG00000204580	DDR1	protein_coding	NA	967	828.333	0	NA	NA	NA	NA	NA	NA	367	2275	169	205	1114	NA	840
ENSG00000178531	CTXN1	protein_coding	NA	968	829.167	0	1068	NA	NA	NA	NA	NA	1497	661	NA	NA	818	451	480
ENSG00000172260	NEGR1	protein_coding	NA	969	829.333	0	1150	752	NA	NA	NA	NA	997	1188	559	NA	330	NA	NA
ENSG00000173258	ZNF483	protein_coding	NA	970.5	831	0	1123	425	NA	414	NA	NA	1214	842	NA	NA	900	NA	899
ENSG00000101558	VAPA	protein_coding	NA	970.5	831	0	1382	1047	NA	189	NA	NA	717	730	878	NA	899	598	1039
ENSG00000173898	SPTBN2	protein_coding	NA	972	831.333	0	1299	NA	NA	NA	NA	NA	NA	1010	NA	NA	185	NA	NA
ENSG00000100473	COCH	protein_coding	NA	973	831.5	0	NA	NA	NA	NA	NA	NA	463	1200	NA	NA	NA	NA	NA
ENSG00000100075	SLC25A1	protein_coding	NA	974	832.6	1	1417	NA	NA	NA	NA	NA	930	1493	NA	NA	257	66	NA
ENSG00000139211	AMIGO2	protein_coding	NA	975	832.8	1	1188	NA	NA	200	NA	NA	256	2467	NA	NA	NA	53	NA
ENSG00000067842	ATP2B3	protein_coding	NA	976	833	0	NA	NA	NA	NA	NA	NA	NA	833	NA	NA	NA	NA	NA
ENSG00000184117	NIPSNAP1	protein_coding	NA	977	834.5	0	NA	NA	NA	NA	NA	NA	781	888	NA	NA	NA	NA	NA
ENSG00000100379	KCTD17	protein_coding	NA	978	835	0	1163	NA	NA	NA	NA	NA	NA	NA	NA	NA	507	NA	NA
ENSG00000135002	RFK	protein_coding	NA	979	835.2	0	975	375	NA	NA	NA	NA	1015	1378	NA	NA	NA	NA	433
ENSG00000135900	MRPL44	protein_coding	NA	980	836	0	NA	NA	NA	NA	NA	NA	NA	836	NA	NA	NA	NA	NA
ENSG00000100664	EIF5	protein_coding	NA	981	836.143	0	360	654	NA	NA	NA	NA	1686	733	751	NA	1111	NA	558
ENSG00000132535	DLG4	protein_coding	NA	982	836.333	0	NA	NA	NA	NA	NA	NA	1260	662	NA	NA	NA	587	NA
ENSG00000072041	SLC6A15	protein_coding	NA	983	838.6	0	514	NA	NA	NA	NA	NA	917	1536	NA	NA	629	597	NA
ENSG00000184515	BEX5	protein_coding	NA	984	839	0	383	252	NA	NA	NA	NA	1584	1388	NA	NA	NA	NA	588
ENSG00000099795	NDUFB7	protein_coding	NA	985	839.286	0	1005	827	354	NA	NA	NA	1326	1161	689	NA	NA	NA	513
ENSG00000169710	FASN	protein_coding	NA	986	839.429	0	562	1006	NA	NA	NA	NA	1674	491	NA	NA	1055	752	336
ENSG00000164398	ACSL6	protein_coding	NA	987	839.667	0	600	NA	NA	NA	NA	NA	558	1361	NA	NA	NA	NA	NA
ENSG00000067191	CACNB1	protein_coding	NA	988	840	0	NA	NA	NA	NA	NA	NA	NA	840	NA	NA	NA	NA	NA
ENSG00000111667	USP5	protein_coding	NA	989	841.333	0	1433	NA	NA	NA	NA	NA	875	1036	NA	NA	754	335	615
ENSG00000100804	PSMB5	protein_coding	NA	990	842.143	0	675	1032	NA	NA	NA	NA	2009	227	NA	NA	345	843	764
ENSG00000125534	PPDPF	protein_coding	NA	991	842.5	0	1929	942	375	NA	NA	NA	1689	717	718	544	785	449	277
ENSG00000109332	UBE2D3	protein_coding	NA	992	843	0	1247	491	NA	NA	NA	NA	842	1196	472	NA	1102	NA	551
ENSG00000173436	MICOS10	protein_coding	NA	993	843.167	0	1765	205	227	NA	NA	NA	1428	904	NA	NA	NA	NA	530
ENSG00000204287	HLA-DRA	protein_coding	NA	994	843.333	0	NA	NA	NA	NA	NA	NA	NA	2175	134	221	NA	NA	NA
ENSG00000152082	MZT2B	protein_coding	NA	995	843.429	0	827	699	NA	NA	NA	NA	939	1074	866	NA	1134	NA	365
ENSG00000123983	ACSL3	protein_coding	NA	996	843.75	0	503	763	NA	NA	NA	NA	1029	1080	NA	NA	NA	NA	NA
ENSG00000165672	PRDX3	protein_coding	NA	997.5	844	0	917	628	NA	NA	NA	NA	1535	769	NA	NA	NA	NA	371
ENSG00000159082	SYNJ1	protein_coding	NA	997.5	844	0	951	446	NA	NA	NA	NA	1438	556	NA	NA	829	NA	NA
ENSG00000183648	NDUFB1	protein_coding	NA	999	844.143	1	670	523	94	291	NA	NA	548	2871	NA	NA	NA	NA	912
ENSG00000168993	CPLX1	protein_coding	NA	1000	845	0	1891	NA	NA	NA	NA	NA	176	468	NA	NA	NA	NA	NA
ENSG00000155093	PTPRN2	protein_coding	NA	1001	847.286	0	821	328	NA	NA	NA	NA	460	2716	NA	NA	587	249	770
ENSG00000138071	ACTR2	protein_coding	NA	1002	847.75	0	704	132	NA	NA	NA	NA	1646	909	NA	NA	NA	NA	NA
ENSG00000102409	BEX4	protein_coding	NA	1003	851.222	0	285	849	500	304	NA	NA	1697	2302	821	NA	589	NA	314
ENSG00000166411	IDH3A	protein_coding	NA	1004	851.333	0	502	NA	NA	NA	NA	NA	766	1286	NA	NA	NA	NA	NA
ENSG00000087191	PSMC5	protein_coding	NA	1005	851.571	0	1270	360	NA	NA	NA	NA	2008	747	716	NA	NA	269	591
ENSG00000132694	ARHGEF11	protein_coding	NA	1006	852	0	NA	NA	NA	NA	NA	NA	NA	852	NA	NA	NA	NA	NA
ENSG00000161011	SQSTM1	protein_coding	NA	1007	852.444	0	751	479	328	NA	NA	NA	1470	1723	786	NA	890	461	784
ENSG00000245532	NEAT1	lncRNA	NA	1008	853.833	2	1554	NA	NA	NA	NA	NA	1964	450	41	33	1081	NA	NA
ENSG00000087274	ADD1	protein_coding	NA	1009	855	0	722	938	NA	NA	NA	NA	1724	493	784	NA	694	712	773
ENSG00000198513	ATL1	protein_coding	NA	1010	855.5	0	322	500	446	NA	NA	NA	2170	1396	NA	NA	881	388	741
ENSG00000084444	FAM234B	protein_coding	NA	1011	856.5	0	606	NA	NA	NA	NA	NA	NA	1107	NA	NA	NA	NA	NA
ENSG00000135250	SRPK2	protein_coding	NA	1012	856.833	0	976	875	NA	NA	NA	NA	602	1659	411	NA	NA	618	NA
ENSG00000091664	SLC17A6	protein_coding	NA	1013	857	0	817	NA	NA	NA	NA	NA	1491	263	NA	NA	NA	NA	NA
ENSG00000105894	PTN	protein_coding	NA	1014	857.2	0	1865	NA	NA	NA	NA	NA	234	718	NA	NA	803	NA	666
ENSG00000161544	CYGB	protein_coding	NA	1015	857.25	1	2203	NA	NA	NA	NA	NA	33	208	NA	NA	NA	NA	985
ENSG00000126524	SBDS	protein_coding	NA	1016	859.857	0	710	1017	NA	NA	NA	NA	1608	805	NA	447	689	NA	743
ENSG00000185950	IRS2	protein_coding	NA	1017	860	0	1474	NA	NA	NA	NA	NA	NA	928	540	498	NA	NA	NA
ENSG00000117691	NENF	protein_coding	NA	1018	860.5	0	1381	1059	162	417	NA	NA	1123	1754	NA	NA	NA	818	170
ENSG00000103089	FA2H	protein_coding	NA	1019	863	0	NA	NA	NA	NA	NA	NA	NA	863	NA	NA	NA	NA	NA
ENSG00000187664	HAPLN4	protein_coding	NA	1020	864.333	0	1525	NA	NA	NA	NA	NA	705	363	NA	NA	NA	NA	NA
ENSG00000182636	NDN	protein_coding	NA	1021	864.625	0	963	767	NA	NA	NA	NA	1267	1729	634	NA	294	347	916
ENSG00000198755	RPL10A	protein_coding	NA	1022	864.875	0	788	238	489	392	NA	NA	1760	1942	867	NA	NA	NA	443
ENSG00000013441	CLK1	protein_coding	NA	1023	865	0	NA	NA	NA	NA	NA	NA	NA	865	NA	NA	NA	NA	NA
ENSG00000141837	CACNA1A	protein_coding	NA	1024	866	0	NA	NA	NA	NA	NA	NA	NA	866	NA	NA	NA	NA	NA
ENSG00000167971	CASKIN1	protein_coding	NA	1025	867	0	1493	NA	NA	NA	NA	NA	613	507	NA	NA	855	NA	NA
ENSG00000137642	SORL1	protein_coding	NA	1026	867.286	0	1319	858	NA	NA	NA	NA	560	709	NA	NA	1018	868	739
ENSG00000162599	NFIA	protein_coding	NA	1027	867.8	1	1683	NA	NA	NA	NA	NA	NA	1197	289	50	1120	NA	NA
ENSG00000182287	AP1S2	protein_coding	NA	1028	868.333	0	1362	524	NA	NA	NA	NA	523	1622	NA	NA	602	NA	577
ENSG00000047249	ATP6V1H	protein_coding	NA	1029.5	869.2	0	637	572	NA	NA	NA	NA	1800	659	NA	NA	NA	NA	678
ENSG00000101421	CHMP4B	protein_coding	NA	1029.5	869.2	0	493	598	NA	NA	NA	NA	2062	941	NA	NA	NA	NA	252
ENSG00000174080	CTSF	protein_coding	NA	1031	870.2	0	812	1040	NA	NA	NA	NA	1064	1164	NA	NA	NA	NA	271
ENSG00000166136	NDUFB8	protein_coding	NA	1032	870.444	0	209	1012	348	298	NA	NA	710	3090	777	NA	751	NA	639
ENSG00000184144	CNTN2	protein_coding	NA	1033	871.571	0	2156	NA	NA	NA	NA	NA	106	1636	474	NA	368	824	537
ENSG00000171703	TCEA2	protein_coding	NA	1034	871.6	0	1101	NA	NA	NA	NA	NA	446	1040	671	NA	NA	NA	1100
ENSG00000111328	CDK2AP1	protein_coding	NA	1035	871.714	0	1403	274	NA	NA	NA	NA	1164	1193	NA	NA	768	726	574
ENSG00000143774	GUK1	protein_coding	NA	1036	872.273	0	712	307	532	348	NA	NA	1897	2736	600	635	406	554	868
ENSG00000164326	CARTPT	protein_coding	NA	1037	872.5	1	2091	NA	NA	NA	NA	NA	626	703	70	NA	NA	NA	NA
ENSG00000105887	MTPN	protein_coding	NA	1038.5	873	0	346	1007	NA	NA	NA	NA	2142	947	663	NA	656	285	938
ENSG00000068400	GRIPAP1	protein_coding	NA	1038.5	873	0	NA	NA	NA	NA	NA	NA	NA	873	NA	NA	NA	NA	NA
ENSG00000105963	ADAP1	protein_coding	NA	1040	874	0	NA	NA	NA	NA	NA	NA	NA	1090	NA	NA	917	615	NA
ENSG00000151917	BEND6	protein_coding	NA	1041	874.5	0	1235	NA	NA	NA	NA	NA	NA	514	NA	NA	NA	NA	NA
ENSG00000114030	KPNA1	protein_coding	NA	1043	875	0	NA	NA	NA	NA	NA	NA	NA	875	NA	NA	NA	NA	NA
ENSG00000187479	C11orf96	protein_coding	NA	1043	875	0	NA	NA	NA	NA	NA	NA	NA	NA	875	NA	NA	NA	NA
ENSG00000103154	NECAB2	protein_coding	NA	1043	875	0	2106	NA	NA	NA	NA	NA	1270	565	NA	NA	146	288	NA
ENSG00000106609	TMEM248	protein_coding	NA	1045	875.667	0	1582	NA	NA	NA	NA	NA	NA	545	NA	NA	NA	NA	500
ENSG00000157168	NRG1	protein_coding	NA	1046.5	876	0	NA	NA	NA	NA	NA	NA	NA	876	NA	NA	NA	NA	NA
ENSG00000109929	SC5D	protein_coding	NA	1046.5	876	0	640	1056	NA	NA	NA	NA	1034	602	NA	NA	NA	NA	1048
ENSG00000114631	PODXL2	protein_coding	NA	1048	876.2	1	1946	843	NA	NA	NA	146	1768	1426	775	532	471	81	774
ENSG00000034713	GABARAPL2	protein_coding	NA	1049	876.222	0	296	532	512	167	NA	NA	968	3179	NA	NA	1058	518	656
ENSG00000067606	PRKCZ	protein_coding	NA	1050	877.5	0	1861	965	NA	NA	NA	NA	1321	1121	436	NA	604	260	452
ENSG00000188612	SUMO2	protein_coding	NA	1051	877.625	0	1596	708	NA	NA	NA	NA	1364	838	337	NA	548	764	866
ENSG00000102316	MAGED2	protein_coding	NA	1052	877.833	0	242	513	NA	NA	NA	NA	1812	1230	NA	NA	968	NA	502
ENSG00000129559	NEDD8	protein_coding	NA	1053	878.333	0	368	462	NA	NA	NA	NA	1547	1204	NA	NA	811	NA	878
ENSG00000114923	SLC4A3	protein_coding	NA	1054.5	878.5	0	1432	NA	NA	NA	NA	NA	1450	379	NA	NA	253	NA	NA
ENSG00000165868	HSPA12A	protein_coding	NA	1054.5	878.5	0	507	503	NA	NA	NA	NA	1700	804	NA	NA	NA	NA	NA
ENSG00000103275	UBE2I	protein_coding	NA	1056.5	879	0	NA	NA	NA	NA	NA	NA	NA	879	NA	NA	NA	NA	NA
ENSG00000169100	SLC25A6	protein_coding	NA	1056.5	879	0	974	1004	NA	NA	NA	NA	949	983	872	NA	1001	854	395
ENSG00000102309	PIN4	protein_coding	NA	1058	880	0	NA	NA	NA	NA	NA	NA	NA	880	NA	NA	NA	NA	NA
ENSG00000107282	APBA1	protein_coding	NA	1059	880.25	0	517	NA	NA	NA	NA	NA	1003	1619	NA	NA	382	NA	NA
ENSG00000198612	COPS8	protein_coding	NA	1060	880.5	0	2072	NA	NA	NA	NA	NA	380	475	NA	NA	595	NA	NA
ENSG00000078902	TOLLIP	protein_coding	NA	1061	881	0	1841	NA	NA	NA	NA	NA	216	639	NA	NA	946	NA	763
ENSG00000175161	CADM2	protein_coding	NA	1062	882	0	1754	438	NA	NA	NA	NA	863	473	NA	NA	NA	NA	NA
ENSG00000158109	TPRG1L	protein_coding	NA	1063	882.286	0	855	722	NA	NA	NA	NA	1763	807	NA	NA	224	733	1072
ENSG00000176871	WSB2	protein_coding	NA	1064	882.375	0	1616	583	NA	NA	NA	NA	1953	274	358	NA	695	867	713
ENSG00000177700	POLR2L	protein_coding	NA	1065	885.111	0	564	977	NA	NA	NA	NA	757	3121	446	610	680	452	359
ENSG00000172889	EGFL7	protein_coding	NA	1066	885.667	0	2094	NA	NA	NA	NA	NA	375	1133	753	NA	451	508	NA
ENSG00000173482	PTPRM	protein_coding	NA	1067	886	0	1261	NA	NA	NA	NA	NA	837	1268	712	NA	352	NA	NA
ENSG00000197535	MYO5A	protein_coding	NA	1068	887	0	688	819	NA	NA	NA	NA	1360	1114	NA	NA	454	NA	NA
ENSG00000133612	AGAP3	protein_coding	NA	1069	888.714	0	1839	NA	NA	NA	NA	NA	2084	912	571	NA	114	247	454
ENSG00000166441	RPL27A	protein_coding	NA	1070	888.8	0	656	537	420	NA	NA	NA	1832	2142	359	312	1091	842	697
ENSG00000206503	HLA-A	protein_coding	NA	1071	889.375	0	1070	601	NA	NA	NA	NA	2215	433	636	164	915	NA	1081
ENSG00000159692	CTBP1	protein_coding	NA	1072	889.444	0	1761	780	NA	NA	NA	NA	1288	1002	414	548	634	763	815
ENSG00000101152	DNAJC5	protein_coding	NA	1073	889.571	0	611	257	NA	NA	NA	NA	646	2667	NA	NA	841	655	550
ENSG00000221890	NPTXR	protein_coding	NA	1074	892.667	0	684	NA	NA	NA	NA	NA	579	1415	NA	NA	NA	NA	NA
ENSG00000151229	SLC2A13	protein_coding	NA	1075	893	0	680	NA	NA	NA	NA	NA	1626	373	NA	NA	NA	NA	NA
ENSG00000117519	CNN3	protein_coding	NA	1076	893.429	0	457	202	NA	NA	NA	NA	1017	2809	393	608	NA	NA	768
ENSG00000106992	AK1	protein_coding	NA	1077	893.8	2	2230	NA	NA	NA	NA	NA	1088	1100	22	29	NA	NA	NA
ENSG00000145495	2023-03-06	protein_coding	NA	1078	893.875	0	1130	516	NA	NA	NA	NA	2086	782	870	NA	463	584	720
ENSG00000132475	H3F3B	protein_coding	NA	1079	894.125	1	1260	770	NA	NA	NA	NA	872	2288	100	105	784	NA	974
ENSG00000122679	RAMP3	protein_coding	NA	1080	894.333	0	NA	NA	NA	NA	NA	NA	NA	1384	NA	NA	610	689	NA
ENSG00000161082	CELF5	protein_coding	NA	1081	895	0	NA	NA	NA	NA	NA	NA	NA	895	NA	NA	NA	NA	NA
ENSG00000144711	IQSEC1	protein_coding	NA	1082.5	896.25	0	1665	912	NA	NA	NA	NA	633	375	NA	NA	NA	NA	NA
ENSG00000164985	PSIP1	protein_coding	NA	1082.5	896.25	0	495	NA	NA	NA	NA	NA	391	1810	NA	NA	NA	NA	889
ENSG00000181904	C5orf24	protein_coding	NA	1084	898	0	NA	NA	NA	NA	NA	NA	NA	898	NA	NA	NA	NA	NA
ENSG00000070831	CDC42	protein_coding	NA	1085	898.455	0	513	605	490	387	NA	NA	2013	2743	413	592	1016	507	604
ENSG00000115541	HSPE1	protein_coding	NA	1086	899.667	0	425	354	436	NA	NA	NA	1117	2082	NA	NA	NA	NA	984
ENSG00000188011	RTP5	protein_coding	NA	1087	899.75	0	1355	NA	NA	NA	NA	NA	NA	1013	NA	NA	1127	104	NA
ENSG00000262814	MRPL12	protein_coding	NA	1088	902.5	0	884	NA	NA	NA	NA	NA	NA	921	NA	NA	NA	NA	NA
ENSG00000100554	ATP6V1D	protein_coding	NA	1089	903	0	403	504	NA	NA	NA	NA	1699	1346	795	NA	NA	NA	671
ENSG00000091129	NRCAM	protein_coding	NA	1090	903.25	0	907	498	NA	NA	NA	NA	552	1656	NA	NA	NA	NA	NA
ENSG00000122545	SEPTIN7	protein_coding	NA	1091	903.8	0	1340	671	281	125	NA	NA	1968	2335	864	NA	440	620	394
ENSG00000115738	ID2	protein_coding	NA	1092.5	904	0	934	NA	NA	NA	NA	NA	NA	874	NA	NA	NA	NA	NA
ENSG00000130558	OLFM1	protein_coding	NA	1092.5	904	0	1067	595	NA	NA	NA	NA	258	1918	NA	NA	NA	NA	682
ENSG00000163346	PBXIP1	protein_coding	NA	1094	904.143	0	1352	NA	NA	NA	NA	NA	1597	1849	101	213	776	441	NA
ENSG00000166974	MAPRE2	protein_coding	NA	1095	904.571	0	497	871	NA	NA	NA	NA	180	2893	NA	NA	991	491	409
ENSG00000081154	PCNP	protein_coding	NA	1096	906.625	0	1000	853	NA	NA	NA	NA	2227	268	802	NA	812	226	1065
ENSG00000189159	JPT1	protein_coding	NA	1097	907.2	0	1076	1046	NA	NA	NA	NA	355	1167	NA	NA	NA	NA	892
ENSG00000164970	FAM219A	protein_coding	NA	1098	908.333	0	581	NA	NA	NA	NA	NA	1629	515	NA	NA	NA	NA	NA
ENSG00000165704	HPRT1	protein_coding	NA	1099	909	0	516	667	NA	NA	NA	NA	1475	978	NA	NA	NA	NA	NA
ENSG00000159176	CSRP1	protein_coding	NA	1100	909.444	0	946	485	NA	NA	NA	NA	2124	1746	565	496	947	485	391
ENSG00000170075	GPR37L1	protein_coding	NA	1101.5	910	0	1399	231	NA	NA	NA	NA	2049	1562	292	108	965	866	718
ENSG00000105429	MEGF8	protein_coding	NA	1101.5	910	0	NA	NA	NA	NA	NA	NA	NA	910	NA	NA	NA	NA	NA
ENSG00000091542	ALKBH5	protein_coding	NA	1103	911.333	0	432	NA	NA	NA	NA	NA	365	1937	NA	NA	NA	NA	NA
ENSG00000171368	TPPP	protein_coding	NA	1104	912.375	0	576	842	NA	NA	NA	NA	1874	994	NA	612	907	638	856
ENSG00000171222	SCAND1	protein_coding	NA	1105	912.5	0	1239	NA	NA	NA	NA	NA	1103	1020	592	632	889	NA	NA
ENSG00000152556	PFKM	protein_coding	NA	1106	913.6	0	873	997	NA	NA	NA	NA	199	1992	NA	NA	NA	NA	507
ENSG00000116871	MAP7D1	protein_coding	NA	1107	914.333	0	1347	773	NA	NA	NA	NA	1366	1734	844	538	772	156	699
ENSG00000132437	DDC	protein_coding	NA	1108	914.5	0	1233	NA	NA	NA	NA	NA	279	1682	NA	NA	464	NA	NA
ENSG00000139737	SLAIN1	protein_coding	NA	1109	914.75	0	1540	NA	NA	NA	NA	NA	576	798	745	NA	NA	NA	NA
ENSG00000116752	BCAS2	protein_coding	NA	1110	915.333	0	1296	NA	NA	NA	NA	NA	915	535	NA	NA	NA	NA	NA
ENSG00000178951	ZBTB7A	protein_coding	NA	1111	915.5	0	NA	NA	NA	NA	NA	NA	377	1454	NA	NA	NA	NA	NA
ENSG00000157542	KCNJ6	protein_coding	NA	1112	916	0	NA	NA	NA	NA	NA	NA	NA	916	NA	NA	NA	NA	NA
ENSG00000112695	COX7A2	protein_coding	NA	1113	916.111	1	223	1005	100	388	NA	NA	1938	2145	561	NA	1105	NA	780
ENSG00000276293	PIP4K2B	protein_coding	NA	1114	916.333	0	2268	158	NA	NA	NA	NA	1508	390	NA	NA	713	NA	461
ENSG00000114942	EEF1B2	protein_coding	NA	1115	916.667	0	1172	947	NA	NA	NA	NA	1279	719	850	NA	NA	NA	533
ENSG00000116288	PARK7	protein_coding	NA	1116	916.75	0	1344	1035	316	NA	NA	NA	539	1565	749	NA	910	NA	876
ENSG00000143126	CELSR2	protein_coding	NA	1117	917	0	NA	NA	NA	NA	NA	NA	NA	917	NA	NA	NA	NA	NA
ENSG00000173511	VEGFB	protein_coding	NA	1118	917.889	0	2146	484	NA	NA	NA	NA	1842	1338	603	307	321	516	704
ENSG00000160785	SLC25A44	protein_coding	NA	1120	918	0	NA	NA	NA	NA	NA	NA	NA	918	NA	NA	NA	NA	NA
ENSG00000166006	KCNC2	protein_coding	NA	1120	918	0	NA	NA	NA	NA	NA	NA	396	1440	NA	NA	NA	NA	NA
ENSG00000250067	YJEFN3	protein_coding	NA	1120	918	0	NA	NA	NA	NA	NA	NA	637	1199	NA	NA	NA	NA	NA
ENSG00000203485	INF2	protein_coding	NA	1122	918.25	0	NA	NA	NA	NA	NA	NA	NA	1679	NA	550	709	735	NA
ENSG00000184007	PTP4A2	protein_coding	NA	1123	919.375	0	2299	998	NA	NA	NA	NA	357	1377	874	NA	565	338	547
ENSG00000104960	PTOV1	protein_coding	NA	1124	919.875	0	1811	904	NA	NA	NA	NA	629	1342	757	NA	568	743	605
ENSG00000116459	ATP5PB	protein_coding	NA	1125	920.167	0	506	657	NA	NA	NA	NA	257	2387	NA	NA	619	NA	1095
ENSG00000166503	HDGFL3	protein_coding	NA	1126	920.25	0	1483	NA	NA	NA	NA	NA	850	406	NA	NA	NA	NA	942
ENSG00000162378	ZYG11B	protein_coding	NA	1127	920.333	0	598	NA	NA	NA	NA	NA	928	1235	NA	NA	NA	NA	NA
ENSG00000078328	RBFOX1	protein_coding	NA	1128	920.5	0	622	NA	NA	NA	NA	NA	NA	1219	NA	NA	NA	NA	NA
ENSG00000153815	CMIP	protein_coding	NA	1129	920.875	0	1094	246	NA	NA	NA	NA	790	3502	454	421	NA	167	693
ENSG00000124614	RPS10	protein_coding	NA	1130	921.667	0	1686	762	NA	NA	NA	NA	1671	1629	456	588	796	540	167
ENSG00000185565	LSAMP	protein_coding	NA	1131	922.75	0	544	NA	NA	NA	NA	NA	409	2359	NA	NA	NA	NA	379
ENSG00000011454	RABGAP1	protein_coding	NA	1132	923	0	1715	NA	NA	NA	NA	NA	542	512	NA	NA	NA	NA	NA
ENSG00000152332	UHMK1	protein_coding	NA	1133	923.5	1	896	79	NA	NA	NA	NA	900	2147	NA	NA	NA	816	703
ENSG00000172667	ZMAT3	protein_coding	NA	1134	923.667	0	459	NA	NA	NA	NA	NA	1175	1137	NA	NA	NA	NA	NA
ENSG00000175203	DCTN2	protein_coding	NA	1135	923.8	0	586	884	NA	NA	NA	NA	645	1521	NA	NA	NA	NA	983
ENSG00000123349	PFDN5	protein_coding	NA	1136	923.818	1	1190	619	93	158	NA	NA	1398	3292	568	565	787	670	822
ENSG00000058262	SEC61A1	protein_coding	NA	1137	927.6	0	2059	NA	NA	NA	NA	NA	NA	926	621	NA	677	355	NA
ENSG00000154310	TNIK	protein_coding	NA	1138.5	929	0	NA	NA	NA	NA	NA	NA	929	NA	NA	NA	NA	NA	NA
ENSG00000182985	CADM1	protein_coding	NA	1138.5	929	0	1200	NA	NA	NA	NA	NA	474	1113	NA	NA	NA	NA	NA
ENSG00000108061	SHOC2	protein_coding	NA	1140	930.25	0	1575	NA	NA	NA	NA	NA	NA	1116	280	NA	750	NA	NA
ENSG00000205531	NAP1L4	protein_coding	NA	1141	930.857	0	910	NA	NA	NA	NA	NA	828	1994	322	NA	989	376	1097
ENSG00000162595	DIRAS3	protein_coding	NA	1142	931.25	0	423	NA	NA	NA	NA	NA	903	1394	NA	NA	NA	NA	1005
ENSG00000158747	NBL1	protein_coding	NA	1143	931.4	0	1208	NA	NA	NA	NA	NA	935	1055	848	NA	611	NA	NA
ENSG00000135070	ISCA1	protein_coding	NA	1144	932	0	1657	NA	NA	NA	NA	NA	844	649	NA	NA	NA	NA	578
ENSG00000166780	BMERB1	protein_coding	NA	1145	932.667	0	427	930	NA	NA	NA	NA	2058	905	NA	NA	786	NA	490
ENSG00000113578	FGF1	protein_coding	NA	1146	934.286	0	1248	435	NA	NA	NA	NA	1052	2001	NA	NA	511	646	647
ENSG00000126777	KTN1	protein_coding	NA	1147	934.4	0	1437	839	NA	NA	NA	NA	1352	542	502	NA	NA	NA	NA
ENSG00000101843	PSMD10	protein_coding	NA	1148	935.4	0	1419	817	NA	NA	NA	NA	499	1649	NA	NA	293	NA	NA
ENSG00000125354	SEPTIN6	protein_coding	NA	1149	937	0	NA	NA	NA	NA	NA	NA	NA	937	NA	NA	NA	NA	NA
ENSG00000119801	YPEL5	protein_coding	NA	1150	938.833	0	1283	941	NA	NA	NA	NA	1446	939	NA	NA	NA	514	510
ENSG00000065559	MAP2K4	protein_coding	NA	1151	939	0	1969	NA	NA	NA	NA	NA	254	594	NA	NA	NA	NA	NA
ENSG00000186577	SMIM29	protein_coding	NA	1152	939.833	0	1717	NA	NA	NA	NA	NA	1161	1667	552	NA	387	155	NA
ENSG00000167642	SPINT2	protein_coding	NA	1153	940	0	1860	NA	NA	NA	NA	NA	360	1075	NA	NA	NA	NA	465
ENSG00000139428	MMAB	protein_coding	NA	1154	941	0	NA	NA	NA	NA	NA	NA	NA	NA	NA	NA	941	NA	NA
ENSG00000022267	FHL1	protein_coding	NA	1155	942.333	0	1489	782	NA	NA	NA	NA	1160	931	NA	NA	996	NA	296
ENSG00000160991	ORAI2	protein_coding	NA	1156	942.5	0	NA	NA	NA	NA	NA	NA	1328	557	NA	NA	NA	NA	NA
ENSG00000155506	LARP1	protein_coding	NA	1157	942.889	0	1462	661	NA	NA	NA	NA	1777	2960	203	597	151	191	484
ENSG00000123472	ATPAF1	protein_coding	NA	1158	943.667	0	1431	NA	NA	NA	NA	NA	428	972	NA	NA	NA	NA	NA
ENSG00000100836	PABPN1	protein_coding	NA	1159	945	0	NA	NA	NA	NA	NA	NA	NA	945	NA	NA	NA	NA	NA
ENSG00000128656	CHN1	protein_coding	NA	1160	945.167	0	1230	563	NA	NA	NA	NA	1231	1474	627	NA	NA	546	NA
ENSG00000116133	DHCR24	protein_coding	NA	1161	945.455	1	1576	1018	64	281	NA	NA	1276	3710	555	520	586	625	189
ENSG00000174695	TMEM167A	protein_coding	NA	1162	945.8	0	1177	597	NA	NA	NA	NA	1073	756	NA	NA	1126	NA	NA
ENSG00000197381	ADARB1	protein_coding	NA	1163	946	0	NA	NA	NA	NA	NA	NA	NA	946	NA	NA	NA	NA	NA
ENSG00000105993	DNAJB6	protein_coding	NA	1164	947.429	0	511	1027	NA	NA	NA	NA	1598	868	NA	NA	801	828	999
ENSG00000011426	ANLN	protein_coding	NA	1165.5	948	0	NA	NA	NA	NA	NA	NA	905	991	NA	NA	NA	NA	NA
ENSG00000167371	PRRT2	protein_coding	NA	1165.5	948	0	NA	NA	NA	NA	NA	NA	NA	948	NA	NA	NA	NA	NA
ENSG00000178127	NDUFV2	protein_coding	NA	1167	949.6	0	857	857	NA	NA	NA	NA	1033	1267	NA	NA	NA	NA	734
ENSG00000029725	RABEP1	protein_coding	NA	1168.5	951	0	1538	NA	NA	NA	NA	NA	746	569	NA	NA	NA	NA	NA
ENSG00000243678	NME2	protein_coding	NA	1168.5	951	0	587	1042	455	263	NA	NA	1885	1497	NA	NA	NA	NA	928
ENSG00000155980	KIF5A	protein_coding	NA	1170	951.143	0	971	826	NA	NA	NA	NA	2225	691	NA	NA	316	704	925
ENSG00000137575	SDCBP	protein_coding	NA	1171	951.5	0	1088	638	NA	NA	NA	NA	1061	2045	419	NA	458	NA	NA
ENSG00000178950	GAK	protein_coding	NA	1172.5	952	0	NA	NA	NA	NA	NA	NA	NA	952	NA	NA	NA	NA	NA
ENSG00000165525	NEMF	protein_coding	NA	1172.5	952	0	490	NA	NA	NA	NA	NA	NA	1414	NA	NA	NA	NA	NA
ENSG00000197063	MAFG	protein_coding	NA	1174	953	0	NA	NA	NA	NA	NA	NA	NA	1355	551	NA	NA	NA	NA
ENSG00000168036	CTNNB1	protein_coding	NA	1175	953.5	0	664	1016	NA	NA	NA	NA	1339	1644	265	NA	1110	687	903
ENSG00000159199	ATP5MC1	protein_coding	NA	1176	954.5	0	1879	726	NA	NA	NA	NA	541	672	NA	NA	NA	NA	NA
ENSG00000162368	CMPK1	protein_coding	NA	1177	955.167	0	1196	635	NA	NA	NA	NA	1616	1129	NA	NA	667	488	NA
ENSG00000175899	A2M	protein_coding	NA	1178	955.429	0	716	NA	NA	NA	NA	NA	677	2528	649	344	715	NA	1059
ENSG00000187109	NAP1L1	protein_coding	NA	1179	956	0	898	217	NA	NA	NA	NA	262	3312	871	624	746	767	907
ENSG00000135404	CD63	protein_coding	NA	1180	956.1	0	1217	898	250	NA	NA	NA	1984	3123	164	407	522	731	265
ENSG00000125166	GOT2	protein_coding	NA	1181	956.333	0	860	NA	NA	NA	NA	NA	884	1125	NA	NA	NA	NA	NA
ENSG00000125648	SLC25A23	protein_coding	NA	1182	956.667	0	1040	NA	NA	NA	NA	NA	618	1569	NA	NA	1060	819	634
ENSG00000130638	ATXN10	protein_coding	NA	1183	958.429	0	474	423	NA	NA	NA	NA	2055	1343	NA	NA	982	470	962
ENSG00000105583	WDR83OS	protein_coding	NA	1184	959.25	0	694	NA	NA	NA	NA	NA	1379	693	NA	NA	1071	NA	NA
ENSG00000106682	EIF4H	protein_coding	NA	1185	959.5	0	392	893	NA	NA	NA	NA	1465	1922	NA	NA	560	NA	525
ENSG00000119632	IFI27L2	protein_coding	NA	1186	960.167	0	748	1024	NA	NA	NA	NA	1145	830	NA	NA	944	NA	1070
ENSG00000059804	SLC2A3	protein_coding	NA	1187	961.2	0	1321	NA	NA	NA	NA	NA	NA	2233	273	297	NA	682	NA
ENSG00000140943	MBTPS1	protein_coding	NA	1188	963	0	NA	NA	NA	NA	NA	NA	963	NA	NA	NA	NA	NA	NA
ENSG00000196405	EVL	protein_coding	NA	1189	963.125	0	1159	470	NA	NA	NA	NA	970	2067	833	NA	1007	579	620
ENSG00000138814	PPP3CA	protein_coding	NA	1190	963.25	0	492	NA	NA	NA	NA	NA	1780	581	NA	NA	NA	NA	1000
ENSG00000111371	SLC38A1	protein_coding	NA	1191	964.4	0	2232	NA	NA	NA	NA	NA	1524	674	136	256	NA	NA	NA
ENSG00000143248	RGS5	protein_coding	NA	1192.5	965	0	NA	NA	NA	NA	NA	NA	901	955	865	NA	1139	NA	NA
ENSG00000182916	TCEAL7	protein_coding	NA	1192.5	965	0	1864	959	NA	NA	NA	NA	729	308	NA	NA	NA	NA	NA
ENSG00000140280	LYSMD2	protein_coding	NA	1194	965.333	0	935	NA	NA	NA	NA	NA	1500	461	NA	NA	NA	NA	NA
ENSG00000101084	RAB5IF	protein_coding	NA	1195	967.333	0	609	NA	NA	NA	NA	NA	1133	1160	NA	NA	NA	NA	NA
ENSG00000023228	NDUFS1	protein_coding	NA	1196	967.5	0	1916	NA	NA	NA	NA	NA	540	801	NA	NA	NA	NA	613
ENSG00000211460	TSN	protein_coding	NA	1197	967.667	0	467	NA	NA	NA	NA	NA	893	1543	NA	NA	NA	NA	NA
ENSG00000115540	MOB4	protein_coding	NA	1198	968	0	956	NA	NA	NA	NA	NA	NA	980	NA	NA	NA	NA	NA
ENSG00000160710	ADAR	protein_coding	NA	1199	968.5	0	1032	330	NA	NA	NA	NA	466	2713	723	NA	733	780	971
ENSG00000134121	CHL1	protein_coding	NA	1200	968.6	0	2280	825	NA	NA	NA	NA	725	368	NA	NA	NA	NA	645
ENSG00000164402	SEPTIN8	protein_coding	NA	1201	969.571	0	1292	693	NA	NA	NA	NA	1795	1084	NA	NA	933	482	508
ENSG00000138069	RAB1A	protein_coding	NA	1202	970	0	397	228	NA	NA	NA	NA	1163	2853	835	NA	1010	NA	304
ENSG00000198478	SH3BGRL2	protein_coding	NA	1203	970.333	0	1447	NA	NA	NA	NA	NA	707	757	NA	NA	NA	NA	NA
ENSG00000164124	TMEM144	protein_coding	NA	1204	970.667	0	1844	NA	NA	NA	NA	NA	431	637	NA	NA	NA	NA	NA
ENSG00000116679	IVNS1ABP	protein_coding	NA	1205	971	0	NA	NA	NA	NA	NA	NA	NA	971	NA	NA	NA	NA	NA
ENSG00000164176	EDIL3	protein_coding	NA	1206	973.111	0	2145	399	NA	NA	NA	NA	1402	1965	234	569	1019	557	468
ENSG00000130956	HABP4	protein_coding	NA	1207	973.8	0	1134	781	NA	NA	NA	NA	1705	802	NA	NA	NA	NA	447
ENSG00000107372	ZFAND5	protein_coding	NA	1208	974.125	0	294	1051	NA	NA	NA	NA	2172	1603	276	NA	1140	512	745
ENSG00000090097	PCBP4	protein_coding	NA	1209	975	0	NA	NA	NA	NA	NA	NA	NA	975	NA	NA	NA	NA	NA
ENSG00000036530	CYP46A1	protein_coding	NA	1210	976	0	NA	NA	NA	NA	NA	NA	NA	976	NA	NA	NA	NA	NA
ENSG00000010282	HHATL	protein_coding	NA	1211	978	0	NA	NA	NA	NA	NA	NA	518	1438	NA	NA	NA	NA	NA
ENSG00000128872	TMOD2	protein_coding	NA	1212	978.25	0	756	270	NA	NA	NA	NA	2087	800	NA	NA	NA	NA	NA
ENSG00000092621	PHGDH	protein_coding	NA	1213	979.5	0	806	NA	NA	NA	NA	NA	NA	1153	NA	NA	NA	NA	NA
ENSG00000135924	DNAJB2	protein_coding	NA	1214	980.375	0	1170	945	NA	NA	NA	NA	1628	1206	379	NA	961	768	786
ENSG00000175352	NRIP3	protein_coding	NA	1215	980.6	0	2033	NA	NA	NA	NA	NA	1327	1024	NA	NA	152	367	NA
ENSG00000075785	RAB7A	protein_coding	NA	1216	981.25	0	1014	910	NA	NA	NA	NA	1731	1316	573	NA	618	754	934
ENSG00000082014	SMARCD3	protein_coding	NA	1217	982	0	NA	NA	NA	NA	NA	NA	182	1782	NA	NA	NA	NA	NA
ENSG00000120437	ACAT2	protein_coding	NA	1218	983.333	0	466	NA	NA	NA	NA	NA	969	1515	NA	NA	NA	NA	NA
ENSG00000157064	NMNAT2	protein_coding	NA	1219	983.667	0	1273	NA	NA	NA	NA	NA	430	1248	NA	NA	NA	NA	NA
ENSG00000186687	LYRM7	protein_coding	NA	1220	984	0	NA	NA	NA	NA	NA	NA	NA	984	NA	NA	NA	NA	NA
ENSG00000092820	EZR	protein_coding	NA	1221	984.5	0	NA	NA	NA	NA	NA	NA	787	1182	NA	NA	NA	NA	NA
ENSG00000138279	ANXA7	protein_coding	NA	1222	985	0	1353	NA	NA	NA	NA	NA	NA	617	NA	NA	NA	NA	NA
ENSG00000107223	EDF1	protein_coding	NA	1223	986.2	0	1752	754	507	NA	NA	NA	2121	1688	690	395	563	691	701
ENSG00000090861	AARS	protein_coding	NA	1224	986.25	0	878	677	NA	NA	NA	NA	1881	509	NA	NA	NA	NA	NA
ENSG00000196531	NACA	protein_coding	NA	1225	986.625	0	891	458	NA	NA	NA	NA	1981	1950	724	437	552	NA	900
ENSG00000134769	DTNA	protein_coding	NA	1226	987	1	1085	1045	NA	NA	NA	NA	1285	2310	78	119	NA	NA	NA
ENSG00000126934	MAP2K2	protein_coding	NA	1227	987.333	0	1460	969	NA	NA	NA	NA	1633	1964	564	354	324	542	1076
ENSG00000136238	RAC1	protein_coding	NA	1228	988.4	0	1975	647	145	NA	NA	NA	1844	2065	842	495	670	612	589
ENSG00000169764	UGP2	protein_coding	NA	1229	988.8	0	479	963	NA	NA	NA	NA	1248	1224	NA	NA	NA	NA	1030
ENSG00000166073	GPR176	protein_coding	NA	1230	989	0	NA	NA	NA	NA	NA	NA	NA	989	NA	NA	NA	NA	NA
ENSG00000168297	PXK	protein_coding	NA	1231.5	990	0	NA	NA	NA	NA	NA	NA	NA	990	NA	NA	NA	NA	NA
ENSG00000137216	TMEM63B	protein_coding	NA	1231.5	990	0	NA	NA	NA	NA	NA	NA	NA	NA	NA	NA	990	NA	NA
ENSG00000174238	PITPNA	protein_coding	NA	1233	990.333	0	740	NA	NA	NA	NA	NA	472	1759	NA	NA	NA	NA	NA
ENSG00000214253	FIS1	protein_coding	NA	1234	990.444	0	1945	713	278	NA	NA	NA	740	2489	465	NA	971	681	632
ENSG00000121653	MAPK8IP1	protein_coding	NA	1235	991.125	0	1061	NA	NA	NA	NA	NA	2094	1251	743	248	732	811	989
ENSG00000241685	ARPC1A	protein_coding	NA	1236	991.6	0	2063	662	NA	NA	NA	NA	993	432	NA	NA	808	NA	NA
ENSG00000125967	NECAB3	protein_coding	NA	1237	992	0	NA	NA	NA	NA	NA	NA	NA	992	NA	NA	NA	NA	NA
ENSG00000105254	TBCB	protein_coding	NA	1238	992.9	0	1476	249	453	113	NA	NA	2046	2822	681	NA	609	750	730
ENSG00000121742	GJB6	protein_coding	NA	1239	993	0	NA	NA	NA	NA	NA	NA	713	1273	NA	NA	NA	NA	NA
ENSG00000204681	GABBR1	protein_coding	NA	1240	993.667	0	1738	940	NA	NA	NA	NA	1322	444	NA	NA	573	NA	945
ENSG00000115694	STK25	protein_coding	NA	1241	995	0	1426	985	NA	NA	NA	NA	NA	919	NA	NA	805	840	NA
ENSG00000256045	MTRNR2L10	protein_coding	NA	1242	995.375	0	1542	961	NA	NA	NA	NA	2031	460	888	482	802	797	NA
ENSG00000135624	CCT7	protein_coding	NA	1243.5	996	0	1443	NA	NA	NA	NA	NA	610	1563	NA	NA	NA	NA	368
ENSG00000110717	NDUFS8	protein_coding	NA	1243.5	996	0	1041	NA	NA	NA	NA	NA	759	1211	NA	NA	NA	NA	973
ENSG00000065000	AP3D1	protein_coding	NA	1245	996.25	0	1384	NA	NA	NA	NA	NA	691	1244	NA	NA	666	NA	NA
ENSG00000124702	KLHDC3	protein_coding	NA	1246	997.2	0	1800	NA	NA	NA	NA	NA	976	280	NA	NA	1103	NA	827
ENSG00000116983	HPCAL4	protein_coding	NA	1247	997.6	0	734	NA	NA	NA	NA	NA	1151	1853	NA	NA	506	744	NA
ENSG00000175426	PCSK1	protein_coding	NA	1248	997.8	0	1448	NA	NA	NA	NA	NA	1401	1307	708	NA	NA	NA	125
ENSG00000108439	PNPO	protein_coding	NA	1249	998	0	NA	NA	NA	NA	NA	NA	1083	913	NA	NA	NA	NA	NA
ENSG00000167978	SRRM2	protein_coding	NA	1250	999	0	NA	NA	NA	NA	NA	NA	NA	1079	NA	NA	NA	NA	919
ENSG00000149084	HSD17B12	protein_coding	NA	1251	1000	0	1455	NA	NA	NA	NA	NA	768	1134	NA	NA	NA	NA	643
ENSG00000204525	HLA-C	protein_coding	NA	1252	1001.12	0	724	994	NA	NA	NA	NA	1963	1512	668	358	1063	727	NA
ENSG00000274070	CASTOR2	protein_coding	NA	1253.5	1002	0	NA	NA	NA	NA	NA	NA	1054	950	NA	NA	NA	NA	NA
ENSG00000105518	TMEM205	protein_coding	NA	1253.5	1002	0	1639	NA	NA	NA	NA	NA	458	1103	NA	NA	NA	NA	808
ENSG00000107331	ABCA2	protein_coding	NA	1255	1002.5	0	1522	NA	NA	NA	NA	NA	580	1738	504	NA	1136	NA	535
ENSG00000135919	SERPINE2	protein_coding	NA	1256	1002.67	0	1223	344	NA	NA	NA	NA	210	2834	NA	NA	1123	NA	282
ENSG00000114867	EIF4G1	protein_coding	NA	1257	1003	0	NA	NA	NA	NA	NA	NA	NA	1003	NA	NA	NA	NA	NA
ENSG00000177108	ZDHHC22	protein_coding	NA	1258	1004	0	NA	NA	NA	NA	NA	NA	NA	1004	NA	NA	NA	NA	NA
ENSG00000286214	AUXG01000058.1	lncRNA	NA	1259	1004.4	0	249	NA	NA	NA	NA	NA	1730	1026	NA	NA	977	NA	1040
ENSG00000075142	SRI	protein_coding	NA	1260	1005.12	0	613	975	NA	NA	NA	NA	1487	2549	827	NA	603	610	377
ENSG00000180304	OAZ2	protein_coding	NA	1261	1005.17	0	2061	927	NA	NA	NA	NA	1032	1139	NA	NA	NA	566	306
ENSG00000103502	CDIPT	protein_coding	NA	1262	1006.4	0	2186	717	NA	NA	NA	NA	NA	770	NA	NA	NA	697	662
ENSG00000157103	SLC6A1	protein_coding	NA	1263	1007.2	0	1265	517	NA	NA	NA	NA	1306	884	NA	NA	NA	NA	1064
ENSG00000079950	STX7	protein_coding	NA	1264.5	1008	0	1168	NA	NA	NA	NA	NA	NA	848	NA	NA	NA	NA	NA
ENSG00000124126	PREX1	protein_coding	NA	1264.5	1008	0	NA	NA	NA	NA	NA	NA	NA	1008	NA	NA	NA	NA	NA
ENSG00000178952	TUFM	protein_coding	NA	1266	1008.43	0	1551	316	NA	NA	NA	NA	1965	1179	NA	NA	517	536	995
ENSG00000103257	SLC7A5	protein_coding	NA	1267	1008.6	0	NA	NA	NA	NA	NA	NA	NA	2710	270	415	886	762	NA
ENSG00000102531	FNDC3A	protein_coding	NA	1268.5	1009	0	NA	NA	NA	NA	NA	NA	NA	1009	NA	NA	NA	NA	NA
ENSG00000078804	TP53INP2	protein_coding	NA	1268.5	1009	0	2263	1044	NA	NA	NA	NA	288	1151	776	NA	791	NA	750
ENSG00000099817	POLR2E	protein_coding	NA	1270	1010.5	0	744	NA	NA	NA	NA	NA	2195	641	NA	NA	NA	NA	462
ENSG00000160678	S100A1	protein_coding	NA	1271	1011.33	0	1668	NA	287	NA	NA	NA	1574	1637	429	NA	473	NA	NA
ENSG00000077549	CAPZB	protein_coding	NA	1272	1012.25	0	998	730	NA	NA	NA	NA	1224	3045	697	NA	439	456	509
ENSG00000084710	EFR3B	protein_coding	NA	1273.5	1013	1	2226	978	NA	NA	NA	NA	1212	1291	NA	NA	344	27	NA
ENSG00000099365	STX1B	protein_coding	NA	1273.5	1013	0	1073	NA	NA	NA	NA	NA	338	1731	NA	NA	984	NA	939
ENSG00000182196	ARL6IP4	protein_coding	NA	1275	1013.17	0	1116	1064	NA	NA	NA	NA	529	1500	NA	NA	940	NA	930
ENSG00000104763	ASAH1	protein_coding	NA	1276	1013.67	0	1555	760	NA	NA	NA	NA	1100	902	NA	NA	948	NA	817
ENSG00000136205	TNS3	protein_coding	NA	1277.5	1014	0	NA	NA	NA	NA	NA	NA	NA	1014	NA	NA	NA	NA	NA
ENSG00000136960	ENPP2	protein_coding	NA	1277.5	1014	0	2133	NA	NA	NA	NA	NA	312	597	NA	NA	NA	NA	NA
ENSG00000169139	UBE2V2	protein_coding	NA	1279	1015	0	1139	695	NA	NA	NA	NA	2162	1301	680	NA	704	593	846
ENSG00000075340	ADD2	protein_coding	NA	1280	1015.25	0	2089	NA	NA	NA	NA	NA	NA	1337	NA	NA	477	158	NA
ENSG00000175471	MCTP1	protein_coding	NA	1281	1016	0	NA	NA	NA	NA	NA	NA	NA	1016	NA	NA	NA	NA	NA
ENSG00000213465	ARL2	protein_coding	NA	1282	1016.22	0	752	971	NA	NA	NA	NA	1573	2656	455	398	655	581	1105
ENSG00000138029	HADHB	protein_coding	NA	1283	1016.5	0	1264	668	NA	NA	NA	NA	1617	765	NA	NA	1004	NA	781
ENSG00000142875	PRKACB	protein_coding	NA	1284.5	1017	0	1591	918	342	NA	NA	NA	761	2766	803	NA	1069	318	585
ENSG00000236609	ZNF853	protein_coding	NA	1284.5	1017	0	NA	NA	NA	NA	NA	NA	NA	1017	NA	NA	NA	NA	NA
ENSG00000164096	C4orf3	protein_coding	NA	1286	1017.89	0	1579	851	NA	NA	NA	NA	1361	2510	392	374	706	845	543
ENSG00000057019	DCBLD2	protein_coding	NA	1287	1018.67	1	NA	NA	NA	NA	NA	NA	NA	2612	409	35	NA	NA	NA
ENSG00000163536	SERPINI1	protein_coding	NA	1288.5	1020.38	0	1185	939	458	NA	NA	NA	1866	1910	NA	NA	528	685	592
ENSG00000131495	NDUFA2	protein_coding	NA	1288.5	1020.38	0	573	356	NA	356	NA	NA	571	3763	765	NA	918	NA	861
ENSG00000176903	PNMA1	protein_coding	NA	1290	1021.8	0	1033	514	NA	NA	NA	NA	2111	869	NA	NA	NA	NA	582
ENSG00000127314	RAP1B	protein_coding	NA	1291	1023	0	NA	NA	NA	NA	NA	NA	NA	1023	NA	NA	NA	NA	NA
ENSG00000198898	CAPZA2	protein_coding	NA	1292	1023.2	0	1015	NA	NA	NA	NA	NA	1112	1885	NA	NA	NA	350	754
ENSG00000134824	FADS2	protein_coding	NA	1293	1024.14	0	1279	NA	NA	NA	NA	NA	1317	2267	519	NA	781	753	253
ENSG00000147044	CASK	protein_coding	NA	1294	1027.5	0	885	NA	NA	NA	NA	NA	NA	1170	NA	NA	NA	NA	NA
ENSG00000075151	EIF4G3	protein_coding	NA	1295	1029	0	NA	NA	NA	NA	NA	NA	1416	642	NA	NA	NA	NA	NA
ENSG00000122126	OCRL	protein_coding	NA	1296	1029.6	0	1120	NA	NA	NA	NA	NA	1245	2042	249	NA	492	NA	NA
ENSG00000142676	RPL11	protein_coding	NA	1297	1031	0	636	921	368	NA	NA	NA	2217	3424	255	426	815	860	388
ENSG00000114383	TUSC2	protein_coding	NA	1298	1031.33	0	1581	NA	NA	NA	NA	NA	1019	494	NA	NA	NA	NA	NA
ENSG00000008441	NFIX	protein_coding	NA	1299	1032.33	0	NA	NA	NA	NA	NA	NA	1316	1439	342	NA	NA	NA	NA
ENSG00000100884	CPNE6	protein_coding	NA	1300	1032.67	0	1855	NA	NA	NA	NA	NA	484	759	NA	NA	NA	NA	NA
ENSG00000103249	CLCN7	protein_coding	NA	1301	1035.2	0	2115	NA	NA	NA	NA	NA	NA	1611	648	NA	334	468	NA
ENSG00000133030	MPRIP	protein_coding	NA	1302	1035.4	0	760	NA	NA	NA	NA	NA	1301	1875	755	NA	486	NA	NA
ENSG00000057608	GDI2	protein_coding	NA	1303	1035.75	0	1135	NA	NA	NA	NA	NA	885	1243	NA	NA	NA	NA	880
ENSG00000241973	PI4KA	protein_coding	NA	1304	1035.8	0	1684	609	NA	NA	NA	NA	491	1776	NA	NA	NA	NA	619
ENSG00000168003	SLC3A2	protein_coding	NA	1305	1036	0	644	380	NA	NA	NA	NA	795	2325	NA	NA	NA	NA	NA
ENSG00000050438	SLC4A8	protein_coding	NA	1306	1036.33	0	1118	NA	NA	NA	NA	NA	1228	763	NA	NA	NA	NA	NA
ENSG00000167863	ATP5PD	protein_coding	NA	1307	1036.8	0	1031	576	NA	NA	NA	NA	2123	463	NA	NA	NA	NA	991
ENSG00000119711	ALDH6A1	protein_coding	NA	1308	1038.33	0	559	NA	NA	NA	NA	NA	904	1652	NA	NA	NA	NA	NA
ENSG00000147862	NFIB	protein_coding	NA	1310	1039	0	NA	NA	NA	NA	NA	NA	NA	NA	NA	NA	1039	NA	NA
ENSG00000140105	WARS	protein_coding	NA	1310	1039	0	1776	NA	NA	NA	NA	NA	684	1960	471	304	NA	NA	NA
ENSG00000126768	TIMM17B	protein_coding	NA	1310	1039	0	NA	NA	NA	NA	NA	NA	NA	1039	NA	NA	NA	NA	NA
ENSG00000126950	TMEM35A	protein_coding	NA	1312	1040.2	1	2027	NA	NA	NA	NA	NA	652	2358	NA	NA	115	49	NA
ENSG00000109654	TRIM2	protein_coding	NA	1313	1040.62	0	841	596	277	NA	NA	NA	1916	2717	NA	NA	682	717	579
ENSG00000111906	HDDC2	protein_coding	NA	1314	1041.2	0	805	833	NA	NA	NA	NA	864	1983	NA	NA	NA	NA	721
ENSG00000184983	NDUFA6	protein_coding	NA	1315	1041.75	0	1066	225	NA	NA	NA	NA	193	2683	NA	NA	NA	NA	NA
ENSG00000143702	CEP170	protein_coding	NA	1316	1042	0	NA	NA	NA	NA	NA	NA	NA	1042	NA	NA	NA	NA	NA
ENSG00000117523	PRRC2C	protein_coding	NA	1317	1042.5	0	1042	NA	NA	NA	NA	NA	716	1665	747	NA	NA	NA	NA
ENSG00000078114	NEBL	protein_coding	NA	1318	1043.33	0	773	244	NA	NA	NA	NA	1296	2565	NA	NA	NA	823	559
ENSG00000151914	DST	protein_coding	NA	1319	1043.67	0	2038	731	NA	NA	NA	NA	1308	1535	619	408	934	856	964
ENSG00000151176	PLBD2	protein_coding	NA	1320	1045.17	0	999	NA	NA	NA	NA	NA	782	3171	453	NA	443	423	NA
ENSG00000130985	UBA1	protein_coding	NA	1321	1045.25	0	1357	NA	NA	NA	NA	NA	1415	630	NA	NA	NA	NA	779
ENSG00000189171	S100A13	protein_coding	NA	1322	1046	0	1282	732	NA	NA	NA	NA	1473	1146	NA	NA	1015	NA	628
ENSG00000167508	MVD	protein_coding	NA	1323	1046.67	0	NA	NA	NA	NA	NA	NA	1512	1325	NA	NA	303	NA	NA
ENSG00000116396	KCNC4	protein_coding	NA	1324	1046.8	0	1373	NA	NA	NA	NA	NA	514	2022	NA	NA	270	NA	1055
ENSG00000010322	NISCH	protein_coding	NA	1325	1047.14	0	1379	840	NA	NA	NA	NA	860	1974	NA	NA	956	239	1082
ENSG00000272325	NUDT3	protein_coding	NA	1326	1047.83	0	1671	691	NA	NA	NA	NA	1529	623	834	NA	939	NA	NA
ENSG00000062485	CS	protein_coding	NA	1327.5	1048.67	0	1291	NA	NA	NA	NA	NA	833	1022	NA	NA	NA	NA	NA
ENSG00000155304	HSPA13	protein_coding	NA	1327.5	1048.67	0	686	NA	NA	NA	NA	NA	1255	1975	840	NA	457	NA	1079
ENSG00000225663	MCRIP1	protein_coding	NA	1329	1049.57	0	2256	805	NA	NA	NA	NA	926	1159	549	609	1043	NA	NA
ENSG00000184226	PCDH9	protein_coding	NA	1330	1049.75	0	869	936	NA	NA	NA	NA	1380	2658	733	524	557	741	NA
ENSG00000104852	SNRNP70	protein_coding	NA	1331	1053	0	1238	NA	NA	NA	NA	NA	334	1587	NA	NA	NA	NA	NA
ENSG00000134248	LAMTOR5	protein_coding	NA	1332	1053.4	0	2212	NA	505	NA	NA	NA	871	1048	NA	NA	NA	NA	631
ENSG00000143436	MRPL9	protein_coding	NA	1333	1054	0	NA	NA	NA	NA	NA	NA	NA	1054	NA	NA	NA	NA	NA
ENSG00000100417	PMM1	protein_coding	NA	1334	1055	0	1055	NA	NA	NA	NA	NA	NA	NA	NA	NA	NA	NA	NA
ENSG00000169021	UQCRFS1	protein_coding	NA	1335	1055.6	0	838	777	NA	NA	NA	NA	528	2574	NA	NA	NA	NA	561
ENSG00000005022	SLC25A5	protein_coding	NA	1336	1055.75	0	698	1003	NA	NA	NA	NA	1155	1367	NA	NA	NA	NA	NA
ENSG00000124767	GLO1	protein_coding	NA	1337.5	1056	0	922	NA	NA	NA	NA	NA	1227	1276	NA	NA	NA	NA	799
ENSG00000064607	SUGP2	protein_coding	NA	1337.5	1056	0	NA	NA	NA	NA	NA	NA	NA	1056	NA	NA	NA	NA	NA
ENSG00000162704	ARPC5	protein_coding	NA	1339	1056.17	0	1176	NA	NA	NA	NA	NA	1687	1772	NA	590	795	317	NA
ENSG00000168280	KIF5C	protein_coding	NA	1340	1057.22	0	1216	1025	NA	NA	NA	NA	2241	1479	877	551	606	696	824
ENSG00000090238	YPEL3	protein_coding	NA	1341	1057.57	0	625	996	NA	NA	NA	NA	611	2394	885	NA	846	NA	1046
ENSG00000074181	NOTCH3	protein_coding	NA	1342	1058	0	NA	NA	NA	NA	NA	NA	NA	1058	NA	NA	NA	NA	NA
ENSG00000186716	BCR	protein_coding	NA	1343	1058.25	0	NA	NA	NA	NA	NA	NA	NA	2195	518	591	929	NA	NA
ENSG00000101265	RASSF2	protein_coding	NA	1344	1058.67	1	1830	NA	90	NA	NA	NA	358	3177	445	NA	452	NA	NA
ENSG00000101220	C20orf27	protein_coding	NA	1345	1060	0	2241	NA	NA	NA	NA	NA	280	1530	NA	NA	189	NA	NA
ENSG00000115944	COX7A2L	protein_coding	NA	1346	1061.43	0	1631	432	NA	NA	NA	NA	797	1930	738	NA	1083	NA	819
ENSG00000108797	CNTNAP1	protein_coding	NA	1347	1061.8	0	1303	NA	NA	NA	NA	NA	1544	1303	NA	NA	703	NA	456
ENSG00000147130	ZMYM3	protein_coding	NA	1348	1062	0	NA	NA	NA	NA	NA	NA	NA	1062	NA	NA	NA	NA	NA
ENSG00000186501	TMEM222	protein_coding	NA	1349	1062.5	0	NA	NA	NA	NA	NA	NA	1162	963	NA	NA	NA	NA	NA
ENSG00000101294	HM13	protein_coding	NA	1350	1064	0	NA	NA	NA	NA	NA	NA	NA	1064	NA	NA	NA	NA	NA
ENSG00000163931	TKT	protein_coding	NA	1351	1065.25	1	2020	NA	NA	NA	NA	NA	91	1085	NA	NA	1065	NA	NA
ENSG00000183020	AP2A2	protein_coding	NA	1352	1065.8	0	621	NA	NA	NA	NA	NA	2146	1459	NA	NA	275	NA	828
ENSG00000125445	MRPS7	protein_coding	NA	1353	1067	0	1560	NA	NA	NA	NA	NA	NA	574	NA	NA	NA	NA	NA
ENSG00000161981	SNRNP25	protein_coding	NA	1354	1068.5	0	NA	NA	NA	NA	NA	NA	653	1484	NA	NA	NA	NA	NA
ENSG00000122873	CISD1	protein_coding	NA	1355	1068.83	0	519	568	NA	NA	NA	NA	1400	1790	NA	NA	1109	NA	1027
ENSG00000100401	RANGAP1	protein_coding	NA	1356	1071.14	0	936	NA	NA	NA	NA	NA	2097	1608	735	NA	357	795	970
ENSG00000121766	ZCCHC17	protein_coding	NA	1357	1071.8	0	1145	NA	NA	NA	NA	NA	1875	829	533	NA	NA	NA	977
ENSG00000270672	MTRNR2L6	protein_coding	NA	1358	1072	0	1072	NA	NA	NA	NA	NA	NA	NA	NA	NA	NA	NA	NA
ENSG00000104490	NCALD	protein_coding	NA	1359	1072.33	1	1505	NA	NA	NA	NA	NA	1461	1283	NA	NA	1031	47	1107
ENSG00000163041	H3F3A	protein_coding	NA	1360	1073.62	0	1840	850	NA	NA	NA	NA	1770	2008	106	436	916	NA	663
ENSG00000119013	NDUFB3	protein_coding	NA	1361	1073.8	0	2201	799	NA	NA	NA	NA	480	1035	NA	NA	NA	NA	854
ENSG00000198363	ASPH	protein_coding	NA	1362	1074.25	0	448	NA	NA	NA	NA	NA	329	2719	NA	NA	NA	NA	801
ENSG00000184897	H1FX	protein_coding	NA	1363	1074.75	0	1374	NA	NA	NA	NA	NA	NA	2039	556	330	NA	NA	NA
ENSG00000125841	NRSN2	protein_coding	NA	1364	1077.5	0	NA	NA	NA	NA	NA	NA	700	1455	NA	NA	NA	NA	NA
ENSG00000100902	PSMA6	protein_coding	NA	1365	1077.67	0	1254	NA	NA	NA	NA	NA	948	1031	NA	NA	NA	NA	NA
ENSG00000249915	PDCD6	protein_coding	NA	1366	1080	0	1169	NA	NA	NA	NA	NA	1102	969	NA	NA	NA	NA	NA
ENSG00000152795	HNRNPDL	protein_coding	NA	1367	1080.17	0	659	785	NA	NA	NA	NA	1116	2434	653	NA	NA	NA	834
ENSG00000114279	FGF12	protein_coding	NA	1368	1080.67	0	1108	NA	NA	NA	NA	NA	494	1640	NA	NA	NA	NA	NA
ENSG00000260230	FRRS1L	protein_coding	NA	1369.5	1081.25	0	351	854	NA	NA	NA	NA	2177	943	NA	NA	NA	NA	NA
ENSG00000065154	OAT	protein_coding	NA	1369.5	1081.25	0	709	824	202	NA	NA	NA	2060	3460	NA	NA	616	131	648
ENSG00000188021	UBQLN2	protein_coding	NA	1371	1081.5	0	1322	NA	NA	NA	NA	NA	693	1424	NA	NA	NA	NA	887
ENSG00000184672	RALYL	protein_coding	NA	1372.5	1082.25	0	1988	NA	NA	NA	NA	NA	1657	451	NA	NA	233	NA	NA
ENSG00000128463	EMC4	protein_coding	NA	1372.5	1082.25	0	689	550	NA	NA	NA	NA	951	2139	NA	NA	NA	NA	NA
ENSG00000116254	CHD5	protein_coding	NA	1374	1082.75	0	1530	NA	NA	NA	NA	NA	NA	1843	729	NA	229	NA	NA
ENSG00000159348	CYB5R1	protein_coding	NA	1375	1083.5	0	1402	NA	NA	NA	NA	NA	456	1829	NA	NA	NA	647	NA
ENSG00000091972	CD200	protein_coding	NA	1376	1083.75	0	957	NA	NA	NA	NA	NA	1391	1091	NA	NA	NA	NA	896
ENSG00000184867	ARMCX2	protein_coding	NA	1377	1084	0	NA	NA	NA	NA	NA	NA	316	1852	NA	NA	NA	NA	NA
ENSG00000240583	AQP1	protein_coding	NA	1378	1084.11	0	2109	915	NA	NA	NA	NA	1747	933	741	549	1101	739	923
ENSG00000165443	PHYHIPL	protein_coding	NA	1379	1084.57	0	272	774	NA	NA	NA	NA	1050	3208	NA	NA	885	695	708
ENSG00000164054	SHISA5	protein_coding	NA	1380	1087.17	0	1385	NA	NA	NA	NA	NA	1870	1081	730	NA	727	730	NA
ENSG00000204463	BAG6	protein_coding	NA	1381	1088	0	1370	NA	NA	NA	NA	NA	NA	806	NA	NA	NA	NA	NA
ENSG00000114784	EIF1B	protein_coding	NA	1382	1088.2	0	557	838	NA	NA	NA	NA	2179	1142	NA	NA	NA	NA	725
ENSG00000146005	PSD2	protein_coding	NA	1383	1089	0	1742	NA	NA	NA	NA	NA	1587	621	NA	NA	NA	NA	406
ENSG00000227051	C14orf132	protein_coding	NA	1384	1090.25	0	1069	NA	NA	NA	NA	NA	1225	1250	NA	NA	NA	817	NA
ENSG00000197959	DNM3	protein_coding	NA	1385	1090.4	0	378	171	NA	NA	NA	NA	1982	1997	NA	NA	NA	NA	924
ENSG00000115677	HDLBP	protein_coding	NA	1386	1091	0	853	NA	NA	NA	NA	NA	1615	1242	NA	NA	654	NA	NA
ENSG00000100242	SUN2	protein_coding	NA	1387	1091.33	0	2412	NA	NA	NA	NA	NA	NA	1572	543	554	653	814	NA
ENSG00000134440	NARS	protein_coding	NA	1388	1091.5	0	1496	227	NA	NA	NA	NA	332	2311	NA	NA	NA	NA	NA
ENSG00000169302	STK32A	protein_coding	NA	1389	1092	0	NA	NA	NA	NA	NA	NA	NA	1092	NA	NA	NA	NA	NA
ENSG00000134265	NAPG	protein_coding	NA	1390	1092.33	0	1670	NA	NA	NA	NA	NA	1096	511	NA	NA	NA	NA	NA
ENSG00000136930	PSMB7	protein_coding	NA	1391	1092.67	0	364	974	NA	NA	NA	NA	818	3253	NA	NA	NA	159	988
ENSG00000158417	EIF5B	protein_coding	NA	1392	1092.8	0	1676	NA	NA	NA	NA	NA	1936	561	799	492	NA	NA	NA
ENSG00000159388	BTG2	protein_coding	NA	1393	1094	0	NA	NA	NA	NA	NA	NA	NA	1094	NA	NA	NA	NA	NA
ENSG00000099814	CEP170B	protein_coding	NA	1394	1095	0	1256	NA	NA	NA	NA	NA	825	1580	NA	NA	NA	719	NA
ENSG00000065923	SLC9A7	protein_coding	NA	1395	1095.67	0	1325	NA	NA	NA	NA	NA	NA	1065	NA	NA	897	NA	NA
ENSG00000089280	FUS	protein_coding	NA	1396	1096.75	0	1365	1015	NA	NA	NA	NA	1394	613	NA	NA	NA	NA	NA
ENSG00000131779	PEX11B	protein_coding	NA	1397	1097	0	NA	NA	NA	NA	NA	NA	NA	1097	NA	NA	NA	NA	NA
ENSG00000108830	RND2	protein_coding	NA	1398	1097.33	0	815	NA	NA	NA	NA	NA	1264	1213	NA	NA	NA	NA	NA
ENSG00000134986	NREP	protein_coding	NA	1399	1098	0	NA	NA	NA	NA	NA	NA	NA	1098	NA	NA	NA	NA	NA
ENSG00000157870	PRXL2B	protein_coding	NA	1400.5	1098.67	0	1466	NA	NA	NA	NA	NA	1431	399	NA	NA	NA	NA	NA
ENSG00000184277	TM2D3	protein_coding	NA	1400.5	1098.67	0	2217	NA	NA	NA	NA	NA	840	239	NA	NA	NA	NA	NA
ENSG00000205336	ADGRG1	protein_coding	NA	1402	1098.8	0	719	NA	NA	NA	NA	NA	1554	1987	652	582	NA	NA	NA
ENSG00000167680	SEMA6B	protein_coding	NA	1403	1099	0	NA	NA	NA	NA	NA	NA	NA	NA	NA	NA	1099	NA	NA
ENSG00000078140	UBE2K	protein_coding	NA	1404	1101.25	0	1305	NA	NA	NA	NA	NA	1299	1165	NA	NA	636	NA	NA
ENSG00000117266	CDK18	protein_coding	NA	1405	1101.5	0	NA	NA	NA	NA	NA	NA	320	1883	NA	NA	NA	NA	NA
ENSG00000134548	SPX	protein_coding	NA	1406	1101.67	0	1324	NA	NA	NA	NA	NA	411	1570	NA	NA	NA	NA	NA
ENSG00000132294	EFR3A	protein_coding	NA	1407	1102	1	1059	86	NA	NA	NA	NA	887	2376	NA	NA	NA	NA	NA
ENSG00000156735	BAG4	protein_coding	NA	1408	1102.5	0	NA	NA	NA	NA	NA	NA	1940	265	NA	NA	NA	NA	NA
ENSG00000101266	CSNK2A1	protein_coding	NA	1409	1102.67	0	916	NA	NA	NA	NA	NA	1805	587	NA	NA	NA	NA	NA
ENSG00000105711	SCN1B	protein_coding	NA	1410	1104.33	0	605	NA	NA	NA	NA	NA	1630	1078	NA	NA	NA	NA	NA
ENSG00000044574	HSPA5	protein_coding	NA	1411	1104.4	0	1180	556	NA	NA	NA	NA	783	2314	NA	NA	NA	NA	689
ENSG00000162433	AK4	protein_coding	NA	1412	1104.5	0	904	NA	NA	NA	NA	NA	1898	1096	NA	NA	NA	520	NA
ENSG00000005238	FAM214B	protein_coding	NA	1413	1105	0	NA	NA	NA	NA	NA	NA	NA	1105	NA	NA	NA	NA	NA
ENSG00000174917	MICOS13	protein_coding	NA	1414	1105.17	0	871	449	NA	NA	NA	NA	1344	2737	NA	NA	930	NA	300
ENSG00000106665	CLIP2	protein_coding	NA	1415	1106	0	1520	NA	NA	NA	NA	NA	1673	1304	546	NA	832	761	NA
ENSG00000129968	ABHD17A	protein_coding	NA	1416	1106.75	0	1467	NA	NA	NA	NA	NA	1059	887	NA	NA	1014	NA	NA
ENSG00000160469	BRSK1	protein_coding	NA	1417	1107.5	0	1472	NA	NA	NA	NA	NA	1392	1033	NA	NA	533	NA	NA
ENSG00000136928	GABBR2	protein_coding	NA	1418	1108	0	NA	NA	NA	NA	NA	NA	NA	1108	NA	NA	NA	NA	NA
ENSG00000164615	CAMLG	protein_coding	NA	1419	1109	0	1487	368	NA	NA	NA	NA	304	2724	NA	NA	662	NA	NA
ENSG00000169554	ZEB2	protein_coding	NA	1420	1109.33	0	NA	NA	NA	NA	NA	NA	1792	727	NA	NA	809	NA	NA
ENSG00000141741	MIEN1	protein_coding	NA	1421	1110	0	NA	NA	NA	NA	NA	NA	NA	1110	NA	NA	NA	NA	NA
ENSG00000179218	CALR	protein_coding	NA	1422	1110.12	0	711	1041	NA	NA	NA	NA	1515	2365	847	NA	998	622	782
ENSG00000143158	MPC2	protein_coding	NA	1423	1110.25	0	1245	703	NA	NA	NA	NA	1787	706	NA	NA	NA	NA	NA
ENSG00000197696	NMB	protein_coding	NA	1424	1110.5	0	NA	NA	NA	NA	NA	NA	1122	1099	NA	NA	NA	NA	NA
ENSG00000159228	CBR1	protein_coding	NA	1425	1110.75	0	1888	NA	NA	NA	NA	NA	931	748	NA	NA	876	NA	NA
ENSG00000111678	C12orf57	protein_coding	NA	1426.5	1111.6	0	1619	682	NA	NA	NA	NA	1013	1675	NA	NA	NA	NA	569
ENSG00000185650	ZFP36L1	protein_coding	NA	1426.5	1111.6	0	2184	NA	NA	NA	NA	NA	634	2149	330	261	NA	NA	NA
ENSG00000092529	CAPN3	protein_coding	NA	1428	1112	0	NA	NA	NA	NA	NA	NA	567	1657	NA	NA	NA	NA	NA
ENSG00000108654	DDX5	protein_coding	NA	1429	1112.38	0	1161	608	NA	NA	NA	NA	1026	3523	204	513	766	NA	1098
ENSG00000213619	NDUFS3	protein_coding	NA	1430	1113.4	0	601	1028	NA	NA	NA	NA	1614	1240	NA	NA	NA	NA	1084
ENSG00000187094	CCK	protein_coding	NA	1431	1116	0	NA	NA	NA	NA	NA	NA	NA	1897	NA	NA	NA	NA	335
ENSG00000172247	C1QTNF4	protein_coding	NA	1432	1116.29	1	890	1031	NA	NA	NA	NA	2091	2217	NA	NA	859	634	92
ENSG00000137106	GRHPR	protein_coding	NA	1433	1116.5	0	715	NA	NA	NA	NA	NA	NA	1518	NA	NA	NA	NA	NA
ENSG00000171552	BCL2L1	protein_coding	NA	1434	1117	0	NA	NA	NA	NA	NA	NA	NA	1117	NA	NA	NA	NA	NA
ENSG00000150459	SAP18	protein_coding	NA	1435	1117.22	0	819	665	NA	NA	NA	NA	1772	3340	761	202	824	829	843
ENSG00000136193	SCRN1	protein_coding	NA	1436	1118.14	0	1753	1065	NA	NA	NA	NA	1250	1645	NA	NA	913	577	624
ENSG00000253719	ATXN7L3B	protein_coding	NA	1437	1118.33	0	921	NA	NA	NA	NA	NA	1505	929	NA	NA	NA	NA	NA
ENSG00000066322	ELOVL1	protein_coding	NA	1438	1119	0	NA	NA	NA	NA	NA	NA	NA	1119	NA	NA	NA	NA	NA
ENSG00000001630	CYP51A1	protein_coding	NA	1439	1119.17	0	1089	632	NA	NA	NA	NA	1171	2191	NA	NA	NA	728	904
ENSG00000142686	C1orf216	protein_coding	NA	1440.5	1120	0	NA	NA	NA	NA	NA	NA	NA	1120	NA	NA	NA	NA	NA
ENSG00000060971	ACAA1	protein_coding	NA	1440.5	1120	0	1580	NA	NA	NA	NA	NA	NA	660	NA	NA	NA	NA	NA
ENSG00000196104	SPOCK3	protein_coding	NA	1442	1120.33	0	468	461	NA	NA	NA	NA	1051	3790	NA	NA	450	502	NA
ENSG00000169564	PCBP1	protein_coding	NA	1443	1122.43	0	1213	776	NA	NA	NA	NA	1679	1437	863	NA	983	NA	906
ENSG00000115966	ATF2	protein_coding	NA	1444	1122.5	0	NA	NA	NA	NA	NA	NA	1389	856	NA	NA	NA	NA	NA
ENSG00000171476	HOPX	protein_coding	NA	1445	1122.67	0	978	NA	NA	NA	NA	NA	1454	936	NA	NA	NA	NA	NA
ENSG00000178209	PLEC	protein_coding	NA	1446.5	1123.5	0	1924	NA	NA	NA	NA	NA	NA	2295	148	127	NA	NA	NA
ENSG00000179292	TMEM151A	protein_coding	NA	1446.5	1123.5	0	2246	NA	NA	NA	NA	NA	NA	702	NA	NA	691	855	NA
ENSG00000174903	RAB1B	protein_coding	NA	1448	1124.67	0	1714	NA	NA	NA	NA	NA	599	1061	NA	NA	NA	NA	NA
ENSG00000184613	NELL2	protein_coding	NA	1449	1125.67	0	1727	NA	NA	NA	NA	NA	600	1050	NA	NA	NA	NA	NA
ENSG00000198843	SELENOT	protein_coding	NA	1450	1126.71	0	617	1055	NA	NA	NA	NA	1170	2121	782	NA	1108	NA	1034
ENSG00000273841	TAF9	protein_coding	NA	1451	1128.33	0	1166	742	NA	NA	NA	NA	NA	1477	NA	NA	NA	NA	NA
ENSG00000169851	PCDH7	protein_coding	NA	1452	1129	0	NA	NA	NA	NA	NA	NA	733	1525	NA	NA	NA	NA	NA
ENSG00000110367	DDX6	protein_coding	NA	1453	1129.2	0	676	NA	NA	NA	NA	NA	689	2588	587	NA	1106	NA	NA
ENSG00000126067	PSMB2	protein_coding	NA	1454	1129.83	0	1874	967	NA	NA	NA	NA	2011	538	NA	NA	NA	601	788
ENSG00000072958	AP1M1	protein_coding	NA	1455	1130	0	1964	NA	NA	NA	NA	NA	554	924	NA	NA	1078	NA	NA
ENSG00000072042	RDH11	protein_coding	NA	1456	1130.2	0	1138	820	NA	NA	NA	NA	784	1834	NA	NA	1075	NA	NA
ENSG00000169255	B3GALNT1	protein_coding	NA	1457	1130.67	0	836	NA	NA	NA	NA	NA	1685	871	NA	NA	NA	NA	NA
ENSG00000138032	PPM1B	protein_coding	NA	1458	1131.5	0	NA	NA	NA	NA	NA	NA	943	1320	NA	NA	NA	NA	NA
ENSG00000115419	GLS	protein_coding	NA	1459	1131.6	0	1278	694	NA	NA	NA	NA	2071	878	NA	NA	737	NA	NA
ENSG00000145349	CAMK2D	protein_coding	NA	1460	1131.75	0	2171	NA	NA	NA	NA	NA	447	1104	NA	NA	NA	NA	805
ENSG00000145293	ENOPH1	protein_coding	NA	1461	1134.17	0	1567	639	NA	NA	NA	NA	1209	1385	NA	NA	958	NA	1047
ENSG00000099246	RAB18	protein_coding	NA	1462	1136.25	0	1001	NA	NA	NA	NA	NA	1178	1372	NA	NA	994	NA	NA
ENSG00000101182	PSMA7	protein_coding	NA	1463	1136.6	0	1240	801	NA	NA	NA	NA	954	1757	NA	NA	NA	NA	931
ENSG00000215301	DDX3X	protein_coding	NA	1464	1137	0	1314	560	NA	NA	NA	NA	1531	1302	NA	NA	978	NA	NA
ENSG00000197982	C1orf122	protein_coding	NA	1465.5	1138	0	2267	408	472	NA	NA	NA	1765	2832	825	NA	502	844	327
ENSG00000082397	EPB41L3	protein_coding	NA	1465.5	1138	0	780	580	NA	NA	NA	NA	1348	3002	NA	NA	1006	227	1023
ENSG00000196914	ARHGEF12	protein_coding	NA	1467	1138.67	0	646	NA	NA	NA	NA	NA	764	2006	NA	NA	NA	NA	NA
ENSG00000084090	STARD7	protein_coding	NA	1468	1139	0	926	867	NA	NA	NA	NA	1167	1596	NA	NA	NA	NA	NA
ENSG00000112514	CUTA	protein_coding	NA	1469	1140.33	0	1313	879	NA	NA	NA	NA	591	2079	NA	NA	1129	NA	851
ENSG00000204592	HLA-E	protein_coding	NA	1470	1140.67	0	2366	NA	NA	NA	NA	NA	767	3012	138	106	455	NA	NA
ENSG00000184205	TSPYL2	protein_coding	NA	1471	1141	0	1823	493	NA	NA	NA	NA	1833	620	NA	NA	NA	NA	936
ENSG00000165916	PSMC3	protein_coding	NA	1472	1142.71	0	2251	NA	NA	NA	NA	NA	1709	665	611	NA	1045	765	953
ENSG00000184221	OLIG1	protein_coding	NA	1473	1145.17	0	1574	728	NA	NA	NA	NA	1172	1550	756	NA	NA	NA	1091
ENSG00000169738	DCXR	protein_coding	NA	1474	1145.75	0	1537	NA	NA	NA	NA	NA	1042	1231	773	NA	NA	NA	NA
ENSG00000187239	FNBP1	protein_coding	NA	1475	1146	0	1222	NA	NA	NA	NA	NA	NA	1070	NA	NA	NA	NA	NA
ENSG00000119705	SLIRP	protein_coding	NA	1476	1147.2	0	2349	846	NA	NA	NA	NA	266	1260	NA	NA	NA	NA	1015
ENSG00000114902	SPCS1	protein_coding	NA	1477	1147.4	0	718	552	NA	NA	NA	NA	622	3009	NA	NA	NA	NA	836
ENSG00000110344	UBE4A	protein_coding	NA	1478	1148	0	1884	NA	NA	NA	NA	NA	NA	412	NA	NA	NA	NA	NA
ENSG00000023734	STRAP	protein_coding	NA	1479	1148.2	0	1422	589	NA	NA	NA	NA	911	2420	NA	NA	399	NA	NA
ENSG00000130312	MRPL34	protein_coding	NA	1480	1148.33	0	1532	NA	NA	NA	NA	NA	497	1416	NA	NA	NA	NA	NA
ENSG00000166340	TPP1	protein_coding	NA	1481	1149	0	1989	NA	NA	NA	NA	NA	282	1176	NA	NA	NA	NA	NA
ENSG00000107863	ARHGAP21	protein_coding	NA	1482	1149.8	0	1608	NA	NA	NA	NA	NA	505	1593	NA	NA	969	NA	1074
ENSG00000122566	HNRNPA2B1	protein_coding	NA	1483	1149.88	0	1948	687	NA	NA	NA	NA	1261	1972	752	NA	1026	863	690
ENSG00000122705	CLTA	protein_coding	NA	1484	1150.75	0	1481	905	NA	NA	NA	NA	1922	1845	704	NA	922	424	1003
ENSG00000165802	NSMF	protein_coding	NA	1485	1150.8	2	1214	NA	NA	NA	NA	NA	NA	3334	96	75	1035	NA	NA
ENSG00000129636	ITFG1	protein_coding	NA	1486	1151.83	0	717	692	NA	NA	NA	NA	800	3173	NA	NA	729	NA	800
ENSG00000160216	AGPAT3	protein_coding	NA	1487	1152.67	0	1410	NA	NA	NA	NA	NA	977	1071	NA	NA	NA	NA	NA
ENSG00000196361	ELAVL3	protein_coding	NA	1488	1153.56	0	2039	772	NA	NA	NA	NA	2222	1574	861	429	981	511	993
ENSG00000160075	SSU72	protein_coding	NA	1489	1153.67	0	1741	690	NA	NA	NA	NA	2140	2176	544	598	734	862	898
ENSG00000132002	DNAJB1	protein_coding	NA	1490	1157.5	0	2144	NA	NA	NA	NA	NA	1838	1025	836	NA	NA	663	439
ENSG00000178947	SMIM10L2A	protein_coding	NA	1491	1157.75	0	1366	NA	NA	NA	NA	NA	NA	1961	NA	NA	774	530	NA
ENSG00000231925	TAPBP	protein_coding	NA	1492	1158.25	0	1079	NA	NA	NA	NA	NA	1444	1448	662	NA	NA	NA	NA
ENSG00000147027	TMEM47	protein_coding	NA	1493	1159	0	649	NA	NA	NA	NA	NA	1124	1704	NA	NA	NA	NA	NA
ENSG00000163703	CRELD1	protein_coding	NA	1494	1160	0	1160	NA	NA	NA	NA	NA	NA	NA	NA	NA	NA	NA	NA
ENSG00000132879	FBXO44	protein_coding	NA	1495	1160.17	0	927	NA	NA	NA	NA	NA	625	3708	857	NA	585	259	NA
ENSG00000130723	PRRC2B	protein_coding	NA	1496	1160.25	0	1563	NA	NA	NA	NA	NA	1131	853	NA	NA	1094	NA	NA
ENSG00000134030	CTIF	protein_coding	NA	1497	1162.75	0	1797	NA	NA	NA	NA	NA	NA	1641	578	NA	NA	635	NA
ENSG00000138593	SECISBP2L	protein_coding	NA	1498	1164	0	NA	NA	NA	NA	NA	NA	462	1866	NA	NA	NA	NA	NA
ENSG00000176095	IP6K1	protein_coding	NA	1499	1165	0	1648	NA	NA	NA	NA	NA	NA	682	NA	NA	NA	NA	NA
ENSG00000137880	GCHFR	protein_coding	NA	1500	1165.5	0	1354	NA	NA	NA	NA	NA	NA	977	NA	NA	NA	NA	NA
ENSG00000106052	TAX1BP1	protein_coding	NA	1501	1166.5	0	804	527	NA	NA	NA	NA	2108	1227	NA	NA	NA	NA	NA
ENSG00000151320	AKAP6	protein_coding	NA	1502	1166.75	0	868	NA	NA	NA	NA	NA	628	2120	NA	NA	1051	NA	NA
ENSG00000204071	TCEAL6	protein_coding	NA	1503	1167	0	844	NA	NA	NA	NA	NA	NA	1490	NA	NA	NA	NA	NA
ENSG00000160714	UBE2Q1	protein_coding	NA	1504.5	1168	0	391	1030	NA	NA	NA	NA	1759	1492	NA	NA	NA	NA	NA
ENSG00000107643	MAPK8	protein_coding	NA	1504.5	1168	0	NA	NA	NA	NA	NA	NA	NA	1168	NA	NA	NA	NA	NA
ENSG00000177889	UBE2N	protein_coding	NA	1506	1168.29	0	1539	1001	NA	NA	NA	NA	584	3187	NA	NA	911	498	458
ENSG00000166446	CDYL2	protein_coding	NA	1507	1169	0	NA	NA	NA	NA	NA	NA	NA	1169	NA	NA	NA	NA	NA
ENSG00000215717	TMEM167B	protein_coding	NA	1508	1171	0	NA	NA	NA	NA	NA	NA	NA	1171	NA	NA	NA	NA	NA
ENSG00000157193	LRP8	protein_coding	NA	1509.5	1172	0	NA	NA	NA	NA	NA	NA	NA	1172	NA	NA	NA	NA	NA
ENSG00000105058	FAM32A	protein_coding	NA	1509.5	1172	0	NA	NA	NA	NA	NA	NA	1412	932	NA	NA	NA	NA	NA
ENSG00000119048	UBE2B	protein_coding	NA	1511	1172.5	0	1269	NA	NA	NA	NA	NA	NA	1076	NA	NA	NA	NA	NA
ENSG00000242485	MRPL20	protein_coding	NA	1512	1173.17	0	1565	1013	NA	NA	NA	NA	1377	1462	NA	NA	1118	NA	504
ENSG00000071127	WDR1	protein_coding	NA	1513	1173.5	0	1225	NA	NA	NA	NA	NA	NA	1122	NA	NA	NA	NA	NA
ENSG00000090863	GLG1	protein_coding	NA	1514	1173.83	0	1992	NA	NA	NA	NA	NA	1970	1185	550	NA	1079	267	NA
ENSG00000107551	RASSF4	protein_coding	NA	1515	1174	0	NA	NA	NA	NA	NA	NA	NA	1174	NA	NA	NA	NA	NA
ENSG00000113441	LNPEP	protein_coding	NA	1516	1175.5	0	NA	NA	NA	NA	NA	NA	1307	1044	NA	NA	NA	NA	NA
ENSG00000174231	PRPF8	protein_coding	NA	1517	1176	0	1242	551	NA	NA	NA	NA	1923	988	NA	NA	NA	NA	NA
ENSG00000134313	KIDINS220	protein_coding	NA	1518	1176.2	0	1206	607	NA	NA	NA	NA	873	2332	NA	NA	863	NA	NA
ENSG00000100030	MAPK1	protein_coding	NA	1519	1181.14	0	1124	756	NA	NA	NA	NA	1862	2367	NA	NA	821	418	920
ENSG00000134644	PUM1	protein_coding	NA	1520	1181.25	0	953	NA	NA	NA	NA	NA	1176	1703	NA	NA	NA	NA	893
ENSG00000015592	STMN4	protein_coding	NA	1521.5	1181.4	0	1915	NA	NA	NA	NA	NA	664	2740	151	NA	NA	NA	437
ENSG00000148468	FAM171A1	protein_coding	NA	1521.5	1181.4	0	1943	283	NA	NA	NA	NA	2137	859	NA	NA	NA	NA	685
ENSG00000017260	ATP2C1	protein_coding	NA	1523	1183	0	1898	NA	NA	NA	NA	NA	376	2020	NA	NA	NA	438	NA
ENSG00000074211	PPP2R2C	protein_coding	NA	1524	1183.33	0	1143	NA	NA	NA	NA	NA	899	1508	NA	NA	NA	NA	NA
ENSG00000138398	PPIG	protein_coding	NA	1525.5	1184	0	1368	NA	NA	NA	NA	NA	1621	563	NA	NA	NA	NA	NA
ENSG00000184156	KCNQ3	protein_coding	NA	1525.5	1184	0	1732	NA	NA	NA	NA	NA	NA	636	NA	NA	NA	NA	NA
ENSG00000107758	PPP3CB	protein_coding	NA	1527	1184.5	0	1767	976	NA	NA	NA	NA	2076	1216	NA	NA	531	NA	541
ENSG00000067221	STOML1	protein_coding	NA	1528	1185.25	0	1978	NA	NA	NA	NA	NA	NA	2074	NA	NA	561	128	NA
ENSG00000038219	BOD1L1	protein_coding	NA	1529	1185.33	0	1674	NA	NA	NA	NA	NA	1153	729	NA	NA	NA	NA	NA
ENSG00000179820	MYADM	protein_coding	NA	1530	1186	0	NA	NA	NA	NA	NA	NA	NA	1186	NA	NA	NA	NA	NA
ENSG00000170017	ALCAM	protein_coding	NA	1531	1186.67	0	794	NA	NA	NA	NA	NA	819	1947	NA	NA	NA	NA	NA
ENSG00000012660	ELOVL5	protein_coding	NA	1532	1187.4	0	876	NA	NA	NA	NA	NA	1527	1944	NA	NA	1066	NA	524
ENSG00000104967	NOVA2	protein_coding	NA	1533	1189	0	NA	NA	NA	NA	NA	NA	NA	1189	NA	NA	NA	NA	NA
ENSG00000174574	AKIRIN1	protein_coding	NA	1534	1189.67	0	1162	NA	NA	NA	NA	NA	1619	788	NA	NA	NA	NA	NA
ENSG00000168374	ARF4	protein_coding	NA	1535.5	1190	0	881	NA	NA	NA	NA	NA	2223	466	NA	NA	NA	NA	NA
ENSG00000154153	RETREG1	protein_coding	NA	1535.5	1190	0	1420	NA	NA	NA	NA	NA	1376	774	NA	NA	NA	NA	NA
ENSG00000182117	NOP10	protein_coding	NA	1537.5	1190.5	0	NA	NA	NA	NA	NA	NA	1582	799	NA	NA	NA	NA	NA
ENSG00000147246	HTR2C	protein_coding	NA	1537.5	1190.5	0	NA	NA	NA	NA	NA	NA	1831	550	NA	NA	NA	NA	NA
ENSG00000101958	GLRA2	protein_coding	NA	1539	1191	0	NA	NA	NA	NA	NA	NA	NA	2256	NA	NA	126	NA	NA
ENSG00000183283	DAZAP2	protein_coding	NA	1540	1191.8	0	1086	948	NA	NA	NA	NA	1825	1007	NA	NA	1093	NA	NA
ENSG00000167986	DDB1	protein_coding	NA	1541	1192.5	0	1359	NA	NA	NA	NA	NA	1890	897	NA	NA	624	NA	NA
ENSG00000185201	IFITM2	protein_coding	NA	1542	1193.5	0	NA	NA	NA	NA	NA	NA	NA	1694	693	NA	NA	NA	NA
ENSG00000152822	GRM1	protein_coding	NA	1543	1194	0	NA	NA	NA	NA	NA	NA	NA	1194	NA	NA	NA	NA	NA
ENSG00000167671	UBXN6	protein_coding	NA	1544	1195.2	0	1389	NA	NA	NA	NA	NA	1378	1463	618	NA	1128	NA	NA
ENSG00000063245	EPN1	protein_coding	NA	1545	1196.33	0	2305	NA	NA	NA	NA	NA	407	877	NA	NA	NA	NA	NA
ENSG00000077147	TM9SF3	protein_coding	NA	1546	1196.67	0	1979	NA	NA	NA	NA	NA	803	808	NA	NA	NA	NA	NA
ENSG00000157005	SST	protein_coding	NA	1547	1196.75	0	2117	NA	NA	NA	NA	NA	1579	773	NA	NA	NA	NA	318
ENSG00000182628	SKA2	protein_coding	NA	1548	1198	0	NA	NA	NA	NA	NA	NA	NA	1198	NA	NA	NA	NA	NA
ENSG00000131409	LRRC4B	protein_coding	NA	1549	1199	0	866	NA	NA	NA	NA	NA	1581	2449	NA	NA	273	826	NA
ENSG00000177030	DEAF1	protein_coding	NA	1550	1199.33	0	2279	NA	NA	NA	NA	NA	449	870	NA	NA	NA	NA	NA
ENSG00000169116	PARM1	protein_coding	NA	1551	1199.5	0	529	NA	NA	NA	NA	NA	NA	1870	NA	NA	NA	NA	NA
ENSG00000142864	SERBP1	protein_coding	NA	1552	1200.33	0	1074	NA	NA	NA	NA	NA	1205	1322	NA	NA	NA	NA	NA
ENSG00000198793	MTOR	protein_coding	NA	1553	1201	0	NA	NA	NA	NA	NA	NA	941	1461	NA	NA	NA	NA	NA
ENSG00000117500	TMED5	protein_coding	NA	1554.5	1202	0	NA	NA	NA	NA	NA	NA	857	1547	NA	NA	NA	NA	NA
ENSG00000219438	TAFA5	protein_coding	NA	1554.5	1202	0	1434	NA	NA	NA	NA	NA	326	2706	893	NA	1070	NA	783
ENSG00000060982	BCAT1	protein_coding	NA	1556	1202.5	0	1603	NA	NA	NA	NA	NA	475	1925	807	NA	NA	NA	NA
ENSG00000175395	ZNF25	protein_coding	NA	1557	1202.67	0	1872	NA	NA	NA	NA	NA	843	893	NA	NA	NA	NA	NA
ENSG00000148175	STOM	protein_coding	NA	1558	1203.2	0	1981	NA	NA	NA	NA	NA	1409	1707	410	509	NA	NA	NA
ENSG00000140395	WDR61	protein_coding	NA	1559	1205	0	713	NA	NA	NA	NA	NA	NA	1697	NA	NA	NA	NA	NA
ENSG00000138385	SSB	protein_coding	NA	1560	1206	0	1140	NA	NA	NA	NA	NA	NA	1272	NA	NA	NA	NA	NA
ENSG00000170043	TRAPPC1	protein_coding	NA	1561	1206.25	0	996	NA	NA	NA	NA	NA	1125	1786	NA	NA	NA	NA	918
ENSG00000204564	C6orf136	protein_coding	NA	1562	1207	0	NA	NA	NA	NA	NA	NA	NA	1207	NA	NA	NA	NA	NA
ENSG00000082996	RNF13	protein_coding	NA	1563	1208	0	1514	NA	NA	NA	NA	NA	1464	1639	NA	NA	NA	NA	215
ENSG00000165322	ARHGAP12	protein_coding	NA	1564	1208.5	0	NA	NA	NA	NA	NA	NA	205	2212	NA	NA	NA	NA	NA
ENSG00000258986	TMEM179	protein_coding	NA	1565	1209	0	NA	NA	NA	NA	NA	NA	NA	1209	NA	NA	NA	NA	NA
ENSG00000166257	SCN3B	protein_coding	NA	1566	1209.2	0	2011	NA	NA	NA	NA	NA	1313	1131	NA	NA	NA	623	968
ENSG00000112290	WASF1	protein_coding	NA	1567	1210	0	NA	NA	NA	NA	NA	NA	NA	1210	NA	NA	NA	NA	NA
ENSG00000150753	CCT5	protein_coding	NA	1568	1210.2	0	1477	471	NA	NA	NA	NA	2057	1181	NA	NA	NA	NA	865
ENSG00000154582	ELOC	protein_coding	NA	1569	1213	0	1187	229	NA	NA	NA	NA	1181	2430	NA	NA	NA	NA	1038
ENSG00000100320	RBFOX2	protein_coding	NA	1570	1214.2	0	2431	NA	NA	NA	NA	NA	434	2179	760	NA	267	NA	NA
ENSG00000069424	KCNAB2	protein_coding	NA	1571.5	1214.67	0	1453	NA	NA	NA	NA	NA	1522	669	NA	NA	NA	NA	NA
ENSG00000132305	IMMT	protein_coding	NA	1571.5	1214.67	0	961	NA	NA	NA	NA	NA	640	2043	NA	NA	NA	NA	NA
ENSG00000109738	GLRB	protein_coding	NA	1573	1215	0	1369	NA	NA	NA	NA	NA	785	1491	NA	NA	NA	NA	NA
ENSG00000146007	ZMAT2	protein_coding	NA	1574	1215.33	0	639	NA	NA	NA	NA	NA	416	2591	NA	NA	NA	NA	NA
ENSG00000122958	VPS26A	protein_coding	NA	1575	1215.5	0	874	NA	NA	NA	NA	NA	NA	1557	NA	NA	NA	NA	NA
ENSG00000143811	PYCR2	protein_coding	NA	1576	1216	0	1814	NA	NA	NA	NA	NA	461	1373	NA	NA	NA	NA	NA
ENSG00000104131	EIF3J	protein_coding	NA	1577	1216.5	0	932	NA	NA	NA	NA	NA	NA	1501	NA	NA	NA	NA	NA
ENSG00000109189	USP46	protein_coding	NA	1578.5	1217	0	NA	NA	NA	NA	NA	NA	NA	1217	NA	NA	NA	NA	NA
ENSG00000111786	SRSF9	protein_coding	NA	1578.5	1217	0	1886	NA	NA	NA	NA	NA	1057	1777	606	NA	759	NA	NA
ENSG00000136280	CCM2	protein_coding	NA	1580	1218	0	2335	NA	NA	NA	NA	NA	938	381	NA	NA	NA	NA	NA
ENSG00000072832	CRMP1	protein_coding	NA	1581	1218.2	0	1193	NA	NA	NA	NA	NA	1278	2283	NA	NA	632	705	NA
ENSG00000187764	SEMA4D	protein_coding	NA	1582	1218.33	0	2428	745	NA	NA	NA	NA	103	3256	NA	NA	578	NA	200
ENSG00000113575	PPP2CA	protein_coding	NA	1584	1219	0	634	384	NA	NA	NA	NA	2204	3235	NA	NA	588	411	1077
ENSG00000111229	ARPC3	protein_coding	NA	1584	1219	0	1593	701	NA	NA	NA	NA	726	1856	NA	NA	NA	NA	NA
ENSG00000169093	ASMTL	protein_coding	NA	1584	1219	0	NA	NA	NA	NA	NA	NA	NA	1632	NA	NA	NA	NA	806
ENSG00000100380	ST13	protein_coding	NA	1586	1220.17	0	666	437	NA	NA	NA	NA	1946	2100	NA	NA	1080	NA	1092
ENSG00000185774	KCNIP4	protein_coding	NA	1587	1220.33	0	1309	NA	NA	NA	NA	NA	586	1766	NA	NA	NA	NA	NA
ENSG00000005810	MYCBP2	protein_coding	NA	1588	1221.33	0	846	NA	NA	NA	NA	NA	1813	1005	NA	NA	NA	NA	NA
ENSG00000241553	ARPC4	protein_coding	NA	1589.5	1222.5	0	2189	NA	NA	NA	NA	NA	952	1955	801	NA	871	567	NA
ENSG00000154122	ANKH	protein_coding	NA	1589.5	1222.5	0	1986	NA	NA	NA	NA	NA	415	1435	NA	NA	NA	NA	1054
ENSG00000106278	PTPRZ1	protein_coding	NA	1591	1223.4	0	1405	664	NA	NA	NA	NA	1346	1678	NA	NA	NA	NA	1024
ENSG00000101745	ANKRD12	protein_coding	NA	1592	1223.67	0	703	NA	NA	NA	NA	NA	1089	1879	NA	NA	NA	NA	NA
ENSG00000133243	BTBD2	protein_coding	NA	1593	1224	0	NA	NA	NA	NA	NA	NA	932	1781	NA	NA	959	NA	NA
ENSG00000108528	SLC25A11	protein_coding	NA	1594	1224.33	0	737	NA	NA	NA	NA	NA	NA	1924	NA	NA	1012	NA	NA
ENSG00000137449	CPEB2	protein_coding	NA	1596	1225	0	NA	NA	NA	NA	NA	NA	NA	1225	NA	NA	NA	NA	NA
ENSG00000105968	H2AFV	protein_coding	NA	1596	1225	0	933	NA	NA	NA	NA	NA	2153	935	879	NA	NA	NA	NA
ENSG00000173141	MRPL57	protein_coding	NA	1596	1225	0	826	NA	NA	NA	NA	NA	1121	1728	NA	NA	NA	NA	NA
ENSG00000092051	JPH4	protein_coding	NA	1598	1225.5	0	1623	NA	NA	NA	NA	NA	NA	828	NA	NA	NA	NA	NA
ENSG00000118200	CAMSAP2	protein_coding	NA	1599	1226.8	0	1787	NA	NA	NA	NA	NA	NA	1820	881	NA	1044	602	NA
ENSG00000149357	LAMTOR1	protein_coding	NA	1600	1227.6	0	1901	473	NA	NA	NA	NA	2187	892	NA	NA	685	NA	NA
ENSG00000187555	USP7	protein_coding	NA	1601	1228	0	NA	NA	NA	NA	NA	NA	553	1903	NA	NA	NA	NA	NA
ENSG00000157087	ATP2B2	protein_coding	NA	1602	1228.67	0	939	NA	NA	NA	NA	NA	1208	1539	NA	NA	NA	NA	NA
ENSG00000204842	ATXN2	protein_coding	NA	1603	1229	0	NA	NA	NA	NA	NA	NA	NA	1229	NA	NA	NA	NA	NA
ENSG00000144848	ATG3	protein_coding	NA	1604.5	1229.5	0	NA	NA	NA	NA	NA	NA	2182	277	NA	NA	NA	NA	NA
ENSG00000090013	BLVRB	protein_coding	NA	1604.5	1229.5	0	1331	NA	NA	NA	NA	NA	NA	1128	NA	NA	NA	NA	NA
ENSG00000164880	INTS1	protein_coding	NA	1606	1231.33	0	NA	NA	NA	NA	NA	NA	NA	2017	NA	NA	879	798	NA
ENSG00000121413	ZSCAN18	protein_coding	NA	1607	1231.5	0	1387	NA	NA	NA	NA	NA	1729	797	NA	NA	NA	NA	1013
ENSG00000143418	CERS2	protein_coding	NA	1608	1232	0	NA	NA	NA	NA	NA	NA	NA	1232	NA	NA	NA	NA	NA
ENSG00000175573	C11orf68	protein_coding	NA	1609	1233	0	NA	NA	NA	NA	NA	NA	NA	1233	NA	NA	NA	NA	NA
ENSG00000100387	RBX1	protein_coding	NA	1610	1234.67	0	1523	NA	NA	354	NA	NA	777	2887	NA	NA	870	NA	997
ENSG00000150656	CNDP1	protein_coding	NA	1611	1235	0	2354	NA	NA	NA	NA	NA	392	1173	NA	NA	1021	NA	NA
ENSG00000010270	STARD3NL	protein_coding	NA	1612	1237.67	0	1421	NA	NA	NA	NA	NA	1553	739	NA	NA	NA	NA	NA
ENSG00000103187	COTL1	protein_coding	NA	1613.5	1238	0	1528	NA	NA	NA	NA	NA	NA	1313	873	NA	NA	NA	NA
ENSG00000068308	OTUD5	protein_coding	NA	1613.5	1238	0	NA	NA	NA	NA	NA	NA	NA	1238	NA	NA	NA	NA	NA
ENSG00000177181	RIMKLA	protein_coding	NA	1615	1239	0	NA	NA	NA	NA	NA	NA	NA	1239	NA	NA	NA	NA	NA
ENSG00000198932	GPRASP1	protein_coding	NA	1616	1239.33	0	1018	NA	NA	NA	NA	NA	1707	993	NA	NA	NA	NA	NA
ENSG00000175061	SNHG29	lncRNA	NA	1617	1239.89	0	784	1068	NA	NA	NA	NA	2242	3748	849	409	1011	356	692
ENSG00000166260	COX11	protein_coding	NA	1618	1241	0	NA	NA	NA	NA	NA	NA	NA	1241	NA	NA	NA	NA	NA
ENSG00000072062	PRKACA	protein_coding	NA	1619	1241.14	0	1630	370	NA	NA	NA	NA	1149	3159	NA	NA	865	784	731
ENSG00000051382	PIK3CB	protein_coding	NA	1620	1241.33	0	1276	NA	NA	NA	NA	NA	1005	1443	NA	NA	NA	NA	NA
ENSG00000070214	SLC44A1	protein_coding	NA	1621	1241.8	0	1694	NA	NA	NA	NA	NA	1642	812	NA	NA	1017	NA	1044
ENSG00000159140	SON	protein_coding	NA	1622	1242.75	0	1516	NA	NA	NA	NA	NA	1748	1246	461	NA	NA	NA	NA
ENSG00000109180	OCIAD1	protein_coding	NA	1623	1243.5	0	2172	903	424	NA	NA	NA	1663	2614	485	NA	631	NA	1056
ENSG00000085365	SCAMP1	protein_coding	NA	1624	1243.6	0	1400	771	NA	NA	NA	NA	356	3436	NA	NA	255	NA	NA
ENSG00000144746	ARL6IP5	protein_coding	NA	1625	1243.71	0	317	733	NA	NA	NA	NA	1969	3286	NA	NA	678	810	913
ENSG00000132613	MTSS2	protein_coding	NA	1626	1244	0	1577	NA	NA	NA	NA	NA	1492	663	NA	NA	NA	NA	NA
ENSG00000170390	DCLK2	protein_coding	NA	1627	1245	0	NA	NA	NA	NA	NA	NA	NA	1245	NA	NA	NA	NA	NA
ENSG00000179364	PACS2	protein_coding	NA	1628	1245.25	0	2233	NA	NA	NA	NA	NA	978	646	NA	NA	1124	NA	NA
ENSG00000166228	PCBD1	protein_coding	NA	1629	1246.67	0	1192	NA	NA	NA	NA	NA	894	1654	NA	NA	NA	NA	NA
ENSG00000117528	ABCD3	protein_coding	NA	1630	1247	0	NA	NA	NA	NA	NA	NA	NA	1247	NA	NA	NA	NA	NA
ENSG00000185658	BRWD1	protein_coding	NA	1631	1248.67	0	1513	NA	NA	NA	NA	NA	1266	967	NA	NA	NA	NA	NA
ENSG00000115380	EFEMP1	protein_coding	NA	1632	1249	0	967	NA	NA	NA	NA	NA	NA	1531	NA	NA	NA	NA	NA
ENSG00000118402	ELOVL4	protein_coding	NA	1633	1249.5	0	1358	NA	NA	NA	NA	NA	NA	1141	NA	NA	NA	NA	NA
ENSG00000128731	HERC2	protein_coding	NA	1634	1250	0	2026	NA	NA	NA	NA	NA	NA	474	NA	NA	NA	NA	NA
ENSG00000178449	COX14	protein_coding	NA	1635	1251.33	0	2119	NA	NA	NA	NA	NA	269	1366	NA	NA	NA	NA	NA
ENSG00000143797	MBOAT2	protein_coding	NA	1636	1253	0	NA	NA	NA	NA	NA	NA	NA	1253	NA	NA	NA	NA	NA
ENSG00000104164	BLOC1S6	protein_coding	NA	1637	1255	0	1078	NA	NA	NA	NA	NA	NA	1432	NA	NA	NA	NA	NA
ENSG00000080493	SLC4A4	protein_coding	NA	1638	1255.5	0	1439	NA	NA	NA	NA	NA	NA	1072	NA	NA	NA	NA	NA
ENSG00000143252	SDHC	protein_coding	NA	1639.5	1256.5	0	1097	702	NA	NA	NA	NA	2126	1101	NA	NA	NA	NA	NA
ENSG00000164070	HSPA4L	protein_coding	NA	1639.5	1256.5	0	1793	NA	NA	NA	NA	NA	1186	1214	NA	NA	NA	NA	833
ENSG00000153187	HNRNPU	protein_coding	NA	1641	1258	0	588	673	NA	NA	NA	NA	2199	2419	797	NA	1064	NA	1066
ENSG00000134717	BTF3L4	protein_coding	NA	1642.5	1259	0	NA	NA	NA	NA	NA	NA	NA	1259	NA	NA	NA	NA	NA
ENSG00000002834	LASP1	protein_coding	NA	1642.5	1259	0	1202	NA	NA	NA	NA	NA	1403	1567	NA	NA	NA	NA	864
ENSG00000160007	ARHGAP35	protein_coding	NA	1644	1259.4	0	1601	NA	NA	NA	NA	NA	1839	1623	NA	NA	762	472	NA
ENSG00000144283	PKP4	protein_coding	NA	1645	1259.5	0	2158	NA	NA	NA	NA	NA	831	1327	NA	NA	722	NA	NA
ENSG00000168385	SEPTIN2	protein_coding	NA	1646	1259.67	0	1835	NA	NA	NA	NA	NA	1525	2622	349	NA	896	331	NA
ENSG00000158528	PPP1R9A	protein_coding	NA	1647.5	1261	0	NA	NA	NA	NA	NA	NA	NA	1261	NA	NA	NA	NA	NA
ENSG00000171159	C9orf16	protein_coding	NA	1647.5	1261	0	1243	NA	NA	NA	NA	NA	2043	965	NA	NA	NA	NA	793
ENSG00000205937	RNPS1	protein_coding	NA	1649	1262.2	0	2074	779	NA	NA	NA	NA	1755	600	NA	NA	NA	NA	1103
ENSG00000116161	CACYBP	protein_coding	NA	1650	1262.4	0	429	610	NA	NA	NA	NA	1076	3587	NA	NA	NA	NA	610
ENSG00000170775	GPR37	protein_coding	NA	1651	1263	0	NA	NA	NA	NA	NA	NA	530	1996	NA	NA	NA	NA	NA
ENSG00000144339	TMEFF2	protein_coding	NA	1652	1264	0	619	NA	NA	NA	NA	NA	NA	1909	NA	NA	NA	NA	NA
ENSG00000138107	ACTR1A	protein_coding	NA	1653	1264.86	0	2224	NA	NA	NA	NA	NA	2022	1564	804	NA	854	478	908
ENSG00000165264	NDUFB6	protein_coding	NA	1654	1265	0	973	533	NA	NA	NA	NA	1656	2447	NA	NA	NA	NA	716
ENSG00000116209	TMEM59	protein_coding	NA	1655	1265.62	0	943	1066	492	NA	NA	NA	1954	3034	NA	NA	1013	803	820
ENSG00000141002	TCF25	protein_coding	NA	1656	1266.25	0	1151	NA	NA	NA	NA	NA	2247	1328	NA	NA	NA	NA	339
ENSG00000182093	GET1	protein_coding	NA	1657	1266.4	0	1760	868	NA	NA	NA	NA	822	2542	NA	NA	NA	340	NA
ENSG00000115266	APC2	protein_coding	NA	1658	1266.5	0	2359	NA	NA	NA	NA	NA	1716	1923	298	246	1057	NA	NA
ENSG00000164687	FABP5	protein_coding	NA	1659	1266.57	0	2052	1054	471	NA	NA	NA	544	2784	NA	NA	1028	NA	933
ENSG00000171551	ECEL1	protein_coding	NA	1660	1267	0	NA	NA	NA	NA	NA	NA	NA	1982	NA	NA	NA	NA	552
ENSG00000165152	TMEM246	protein_coding	NA	1661	1268	0	1207	NA	NA	NA	NA	NA	2149	2005	NA	NA	788	592	867
ENSG00000143256	PFDN2	protein_coding	NA	1662	1268.4	0	2384	NA	NA	NA	NA	NA	772	1475	NA	NA	849	NA	862
ENSG00000059915	PSD	protein_coding	NA	1663	1268.5	0	1622	NA	NA	NA	NA	NA	NA	2576	666	NA	NA	210	NA
ENSG00000106537	TSPAN13	protein_coding	NA	1664	1268.67	0	638	NA	NA	NA	NA	NA	1028	2140	NA	NA	NA	NA	NA
ENSG00000197045	GMFB	protein_coding	NA	1665	1270.8	0	1687	NA	NA	NA	NA	NA	960	2174	NA	NA	903	630	NA
ENSG00000064601	CTSA	protein_coding	NA	1666	1271	0	NA	NA	NA	NA	NA	NA	NA	1271	NA	NA	NA	NA	NA
ENSG00000205981	DNAJC19	protein_coding	NA	1667	1274	0	NA	NA	NA	NA	NA	NA	NA	1274	NA	NA	NA	NA	NA
ENSG00000120251	GRIA2	protein_coding	NA	1668	1274.67	0	1612	NA	NA	NA	NA	NA	1268	944	NA	NA	NA	NA	NA
ENSG00000130520	LSM4	protein_coding	NA	1669	1275.8	0	1175	NA	NA	NA	NA	NA	1165	2810	NA	NA	626	NA	603
ENSG00000185518	SV2B	protein_coding	NA	1670	1276.8	1	1376	NA	NA	NA	NA	NA	1948	2845	NA	NA	163	52	NA
ENSG00000137312	FLOT1	protein_coding	NA	1671	1277	0	1444	968	NA	NA	NA	NA	1373	1533	NA	NA	NA	NA	1067
ENSG00000139343	SNRPF	protein_coding	NA	1672	1278	0	NA	NA	NA	NA	NA	NA	NA	1278	NA	NA	NA	NA	NA
ENSG00000119421	NDUFA8	protein_coding	NA	1674	1279	0	2317	983	NA	NA	NA	NA	820	996	NA	NA	NA	NA	NA
ENSG00000004478	FKBP4	protein_coding	NA	1674	1279	0	1237	NA	NA	NA	NA	NA	858	1742	NA	NA	NA	NA	NA
ENSG00000166226	CCT2	protein_coding	NA	1674	1279	0	736	NA	NA	NA	NA	NA	378	2723	NA	NA	NA	NA	NA
ENSG00000123505	AMD1	protein_coding	NA	1676	1279.5	0	1791	NA	NA	NA	NA	NA	NA	768	NA	NA	NA	NA	NA
ENSG00000164076	CAMKV	protein_coding	NA	1677	1280	0	NA	NA	NA	NA	NA	NA	1478	1082	NA	NA	NA	NA	NA
ENSG00000184752	NDUFA12	protein_coding	NA	1678	1281.2	0	1167	1020	NA	NA	NA	NA	1601	1514	NA	NA	NA	NA	1104
ENSG00000010278	CD9	protein_coding	NA	1679	1281.33	0	1610	NA	NA	NA	NA	NA	1213	1021	NA	NA	NA	NA	NA
ENSG00000127585	FBXL16	protein_coding	NA	1680	1281.67	0	1103	NA	NA	NA	NA	NA	2243	499	NA	NA	NA	NA	NA
ENSG00000106105	GARS	protein_coding	NA	1681	1282	0	1048	NA	NA	NA	NA	NA	1198	1600	NA	NA	NA	NA	NA
ENSG00000129159	KCNC1	protein_coding	NA	1682	1286	0	NA	NA	NA	NA	NA	NA	1769	803	NA	NA	NA	NA	NA
ENSG00000104331	IMPAD1	protein_coding	NA	1683	1286.25	0	1285	NA	NA	NA	NA	NA	1479	1280	NA	NA	NA	NA	1101
ENSG00000141542	RAB40B	protein_coding	NA	1684	1287	0	NA	NA	NA	NA	NA	NA	1287	NA	NA	NA	NA	NA	NA
ENSG00000118564	FBXL5	protein_coding	NA	1685.5	1288	0	1205	NA	NA	NA	NA	NA	NA	1371	NA	NA	NA	NA	NA
ENSG00000132286	TIMM10B	protein_coding	NA	1685.5	1288	0	NA	NA	NA	NA	NA	NA	NA	1288	NA	NA	NA	NA	NA
ENSG00000197586	ENTPD6	protein_coding	NA	1687	1288.29	0	2410	NA	NA	NA	NA	NA	1330	2942	523	NA	562	188	1063
ENSG00000104671	DCTN6	protein_coding	NA	1688	1289	0	NA	NA	NA	NA	NA	NA	NA	1289	NA	NA	NA	NA	NA
ENSG00000167114	SLC27A4	protein_coding	NA	1689.5	1289.5	0	1490	NA	NA	NA	NA	NA	NA	1089	NA	NA	NA	NA	NA
ENSG00000105576	TNPO2	protein_coding	NA	1689.5	1289.5	0	1618	NA	NA	NA	NA	NA	1067	1375	NA	NA	1098	NA	NA
ENSG00000135720	DYNC1LI2	protein_coding	NA	1691	1289.71	0	2019	282	NA	NA	NA	NA	1334	2908	767	NA	895	NA	823
ENSG00000069535	MAOB	protein_coding	NA	1692	1290.33	0	421	NA	NA	NA	NA	NA	1093	2357	NA	NA	NA	NA	NA
ENSG00000038382	TRIO	protein_coding	NA	1693	1291	0	NA	NA	NA	NA	NA	NA	1291	NA	NA	NA	NA	NA	NA
ENSG00000163930	BAP1	protein_coding	NA	1694.5	1292	0	NA	NA	NA	NA	NA	NA	1292	NA	NA	NA	NA	NA	NA
ENSG00000119414	PPP6C	protein_coding	NA	1694.5	1292	0	NA	NA	NA	NA	NA	NA	NA	1292	NA	NA	NA	NA	NA
ENSG00000163328	GPR155	protein_coding	NA	1696.5	1292.5	0	NA	NA	NA	NA	NA	NA	1799	786	NA	NA	NA	NA	NA
ENSG00000145687	SSBP2	protein_coding	NA	1696.5	1292.5	0	1725	NA	NA	NA	NA	NA	NA	860	NA	NA	NA	NA	NA
ENSG00000132463	GRSF1	protein_coding	NA	1698	1293.2	0	742	NA	NA	NA	NA	NA	2135	1369	NA	NA	1121	NA	1099
ENSG00000114948	ADAM23	protein_coding	NA	1699	1293.5	0	NA	NA	NA	NA	NA	NA	1351	1236	NA	NA	NA	NA	NA
ENSG00000148090	AUH	protein_coding	NA	1700	1294	0	NA	NA	NA	NA	NA	NA	NA	1294	NA	NA	NA	NA	NA
ENSG00000161057	PSMC2	protein_coding	NA	1701.5	1295	0	NA	NA	NA	NA	NA	NA	NA	1295	NA	NA	NA	NA	NA
ENSG00000121022	COPS5	protein_coding	NA	1701.5	1295	0	1119	NA	NA	NA	NA	NA	NA	1471	NA	NA	NA	NA	NA
ENSG00000078053	AMPH	protein_coding	NA	1703.5	1296	0	1271	NA	NA	NA	NA	NA	2107	510	NA	NA	NA	NA	NA
ENSG00000283103	AC010642.2	lncRNA	NA	1703.5	1296	0	NA	NA	NA	NA	NA	NA	NA	1296	NA	NA	NA	NA	NA
ENSG00000116521	SCAMP3	protein_coding	NA	1705.5	1297	0	NA	NA	NA	NA	NA	NA	NA	1297	NA	NA	NA	NA	NA
ENSG00000144369	FAM171B	protein_coding	NA	1705.5	1297	0	1604	NA	NA	NA	NA	NA	478	1809	NA	NA	NA	NA	NA
ENSG00000133706	LARS	protein_coding	NA	1707.5	1298	0	NA	NA	NA	NA	NA	NA	NA	1298	NA	NA	NA	NA	NA
ENSG00000158470	B4GALT5	protein_coding	NA	1707.5	1298	0	2102	NA	NA	NA	NA	NA	566	1226	NA	NA	NA	NA	NA
ENSG00000185046	ANKS1B	protein_coding	NA	1709	1298.67	0	906	NA	NA	NA	NA	NA	1094	1896	NA	NA	NA	NA	NA
ENSG00000146433	TMEM181	protein_coding	NA	1710	1299	0	NA	NA	NA	NA	NA	NA	NA	1299	NA	NA	NA	NA	NA
ENSG00000188573	FBLL1	protein_coding	NA	1711	1299.83	0	886	NA	NA	NA	NA	NA	2198	2686	NA	NA	643	430	956
ENSG00000020577	SAMD4A	protein_coding	NA	1712.5	1302	0	NA	NA	NA	NA	NA	NA	NA	2791	581	534	NA	NA	NA
ENSG00000099864	PALM	protein_coding	NA	1712.5	1302	0	NA	NA	NA	NA	NA	NA	1388	2242	685	NA	893	NA	NA
ENSG00000172500	FIBP	protein_coding	NA	1714	1302.33	0	962	NA	NA	NA	NA	NA	2238	707	NA	NA	NA	NA	NA
ENSG00000155096	AZIN1	protein_coding	NA	1715	1303.4	0	2037	NA	NA	NA	NA	NA	1118	1929	NA	NA	NA	838	595
ENSG00000110514	MADD	protein_coding	NA	1716	1303.8	0	1743	NA	NA	NA	NA	NA	1822	1919	NA	NA	222	813	NA
ENSG00000122203	KIAA1191	protein_coding	NA	1717	1304.2	0	1323	NA	NA	NA	NA	NA	2212	2093	NA	NA	650	243	NA
ENSG00000168092	PAFAH1B2	protein_coding	NA	1718	1304.62	0	1056	487	NA	NA	NA	NA	1972	3801	860	NA	681	748	832
ENSG00000122642	FKBP9	protein_coding	NA	1719	1305	0	1411	NA	NA	NA	NA	NA	984	1520	NA	NA	NA	NA	NA
ENSG00000155959	VBP1	protein_coding	NA	1720	1306.33	0	1149	NA	NA	NA	NA	NA	1359	1411	NA	NA	NA	NA	NA
ENSG00000241360	PDXP	protein_coding	NA	1721	1307.2	0	1546	NA	NA	NA	NA	NA	1098	2440	512	NA	NA	NA	940
ENSG00000144290	SLC4A10	protein_coding	NA	1722	1308	0	NA	NA	NA	NA	NA	NA	NA	1308	NA	NA	NA	NA	NA
ENSG00000115464	USP34	protein_coding	NA	1723.5	1309	0	NA	NA	NA	NA	NA	NA	NA	1309	NA	NA	NA	NA	NA
ENSG00000090316	MAEA	protein_coding	NA	1723.5	1309	0	798	750	NA	NA	NA	NA	NA	2379	NA	NA	NA	NA	NA
ENSG00000206418	RAB12	protein_coding	NA	1725	1310	0	NA	NA	NA	NA	NA	NA	NA	1310	NA	NA	NA	NA	NA
ENSG00000141959	PFKL	protein_coding	NA	1726	1311.43	0	1963	NA	NA	NA	NA	NA	806	3772	608	238	942	851	NA
ENSG00000154305	MIA3	protein_coding	NA	1728	1312	0	NA	NA	NA	NA	NA	NA	NA	1312	NA	NA	NA	NA	NA
ENSG00000078295	ADCY2	protein_coding	NA	1728	1312	0	1502	NA	NA	NA	NA	NA	562	1872	NA	NA	NA	NA	NA
ENSG00000266964	FXYD1	protein_coding	NA	1728	1312	0	1557	NA	NA	NA	NA	NA	1569	810	NA	NA	NA	NA	NA
ENSG00000169032	MAP2K1	protein_coding	NA	1730	1312.8	0	877	549	NA	NA	NA	NA	2168	2646	NA	NA	NA	NA	324
ENSG00000113811	SELENOK	protein_coding	NA	1731	1313	0	738	878	NA	NA	NA	NA	2001	1635	NA	NA	NA	NA	NA
ENSG00000144357	UBR3	protein_coding	NA	1732	1313.67	0	1718	NA	NA	NA	NA	NA	1652	571	NA	NA	NA	NA	NA
ENSG00000237949	LINC00844	lncRNA	NA	1733	1314.25	0	2000	NA	NA	NA	NA	NA	799	1566	892	NA	NA	NA	NA
ENSG00000187147	RNF220	protein_coding	NA	1734	1316.6	0	2014	NA	NA	NA	NA	NA	1572	1830	NA	NA	401	766	NA
ENSG00000036257	CUL3	protein_coding	NA	1735	1317	0	NA	NA	NA	NA	NA	NA	NA	1317	NA	NA	NA	NA	NA
ENSG00000139910	NOVA1	protein_coding	NA	1736	1317.75	0	1533	NA	NA	NA	NA	NA	2139	505	NA	NA	NA	NA	1094
ENSG00000161533	ACOX1	protein_coding	NA	1737	1319	0	NA	NA	NA	NA	NA	NA	NA	1319	NA	NA	NA	NA	NA
ENSG00000125304	TM9SF2	protein_coding	NA	1738	1321	0	1418	NA	NA	NA	NA	NA	1362	1183	NA	NA	NA	NA	NA
ENSG00000164187	LMBRD2	protein_coding	NA	1739.5	1322.33	0	447	NA	NA	NA	NA	NA	1930	1590	NA	NA	NA	NA	NA
ENSG00000124783	SSR1	protein_coding	NA	1739.5	1322.33	0	1642	NA	NA	NA	NA	NA	1741	584	NA	NA	NA	NA	NA
ENSG00000107872	FBXL15	protein_coding	NA	1741	1325	0	NA	NA	NA	NA	NA	NA	957	1693	NA	NA	NA	NA	NA
ENSG00000006125	AP2B1	protein_coding	NA	1742	1325.25	0	1731	NA	NA	NA	NA	NA	2206	2851	644	611	773	700	1086
ENSG00000169976	SF3B5	protein_coding	NA	1743	1325.67	0	1330	NA	NA	NA	NA	NA	1141	1506	NA	NA	NA	NA	NA
ENSG00000120438	TCP1	protein_coding	NA	1744	1327.25	0	1156	993	NA	NA	NA	NA	964	2196	NA	NA	NA	NA	NA
ENSG00000005075	POLR2J	protein_coding	NA	1745	1327.5	0	1454	NA	NA	NA	NA	NA	NA	1201	NA	NA	NA	NA	NA
ENSG00000183172	SMDT1	protein_coding	NA	1746	1327.67	0	1047	NA	NA	NA	NA	NA	1414	1522	NA	NA	NA	NA	NA
ENSG00000168917	SLC35G2	protein_coding	NA	1747	1328	0	1328	NA	NA	NA	NA	NA	NA	NA	NA	NA	NA	NA	NA
ENSG00000141540	TTYH2	protein_coding	NA	1748	1328.8	0	1774	NA	NA	NA	NA	NA	658	2861	251	NA	1100	NA	NA
ENSG00000177879	AP3S1	protein_coding	NA	1749	1330	0	1383	NA	NA	NA	NA	NA	NA	1277	NA	NA	NA	NA	NA
ENSG00000266472	MRPS21	protein_coding	NA	1750	1330.2	0	1492	847	NA	386	NA	NA	1158	2768	NA	NA	NA	NA	NA
ENSG00000181029	TRAPPC5	protein_coding	NA	1751	1330.5	0	830	567	NA	NA	NA	NA	2018	3085	759	NA	NA	NA	724
ENSG00000120129	DUSP1	protein_coding	NA	1752	1331.4	0	1617	NA	NA	NA	NA	NA	985	2181	NA	NA	838	NA	1036
ENSG00000151746	BICD1	protein_coding	NA	1753	1332	0	NA	NA	NA	NA	NA	NA	NA	1332	NA	NA	NA	NA	NA
ENSG00000172590	MRPL52	protein_coding	NA	1754	1332.33	0	2289	NA	NA	NA	NA	NA	319	1389	NA	NA	NA	NA	NA
ENSG00000108551	RASD1	protein_coding	NA	1755	1333.5	0	NA	NA	NA	NA	NA	NA	NA	2048	NA	619	NA	NA	NA
ENSG00000100764	PSMC1	protein_coding	NA	1756	1334.5	0	1318	NA	NA	NA	NA	NA	NA	1351	NA	NA	NA	NA	NA
ENSG00000177697	CD151	protein_coding	NA	1757	1334.67	0	1645	NA	NA	NA	NA	NA	NA	1582	NA	NA	777	NA	NA
ENSG00000239264	TXNDC5	protein_coding	NA	1758.5	1335	0	NA	NA	NA	NA	NA	NA	NA	1335	NA	NA	NA	NA	NA
ENSG00000198356	GET3	protein_coding	NA	1758.5	1335	0	NA	NA	NA	NA	NA	NA	1395	1275	NA	NA	NA	NA	NA
ENSG00000135506	OS9	protein_coding	NA	1760	1335.33	0	1274	NA	NA	NA	NA	NA	1011	1721	NA	NA	NA	NA	NA
ENSG00000183087	GAS6	protein_coding	NA	1761	1337.4	0	2262	NA	NA	NA	NA	NA	815	2457	805	NA	NA	348	NA
ENSG00000166454	ATMIN	protein_coding	NA	1762	1338	0	1049	NA	NA	NA	NA	NA	1778	1187	NA	NA	NA	NA	NA
ENSG00000115286	NDUFS7	protein_coding	NA	1763	1340.4	0	2041	575	NA	NA	NA	NA	1996	997	NA	NA	NA	NA	1093
ENSG00000132153	DHX30	protein_coding	NA	1764	1340.67	0	986	NA	NA	NA	NA	NA	1060	1976	NA	NA	NA	NA	NA
ENSG00000135390	ATP5MC2	protein_coding	NA	1765	1341.2	0	955	373	NA	NA	NA	NA	1144	3439	NA	NA	NA	NA	795
ENSG00000137100	DCTN3	protein_coding	NA	1766	1342.33	0	1298	NA	NA	NA	NA	NA	2061	668	NA	NA	NA	NA	NA
ENSG00000143401	ANP32E	protein_coding	NA	1767	1345	0	NA	NA	NA	NA	NA	NA	NA	1345	NA	NA	NA	NA	NA
ENSG00000158864	NDUFS2	protein_coding	NA	1768	1346	0	1378	NA	NA	NA	NA	NA	1887	1404	NA	NA	NA	NA	715
ENSG00000243279	PRAF2	protein_coding	NA	1769	1346.5	0	889	NA	NA	NA	NA	NA	1472	2153	NA	NA	NA	NA	872
ENSG00000115866	DARS	protein_coding	NA	1770	1347	0	NA	NA	NA	NA	NA	NA	NA	1347	NA	NA	NA	NA	NA
ENSG00000157827	FMNL2	protein_coding	NA	1771	1347.33	0	1543	NA	NA	NA	NA	NA	1576	923	NA	NA	NA	NA	NA
ENSG00000168906	MAT2A	protein_coding	NA	1772	1349.75	0	1154	NA	NA	NA	NA	NA	2085	1314	NA	NA	NA	846	NA
ENSG00000134108	ARL8B	protein_coding	NA	1774	1350	0	858	806	NA	NA	NA	NA	1708	2954	NA	NA	424	NA	NA
ENSG00000119640	ACYP1	protein_coding	NA	1774	1350	0	NA	NA	NA	NA	NA	NA	NA	1350	NA	NA	NA	NA	NA
[truncated: 2,131 more rows]

## Sheet: C_snRNAseq_NEvsOtherNeuronal
gene_id	gene_name	sum_gene	self_average	other_average	p_value	FDR	summary_logFC	significant
[truncated: 24,823 more rows]

[truncated: 3 more sheets: D_snRNAseq_NEvsAllOther, E_overlap_Visium_snRNAseq, F_snRNAseq_5HTvsOtherNeuronal]
